# Supplementary material for: Asymmetric synthesis of isochromanone derivatives via trapping carboxylic oxonium ylides and aldol cascade
Source: Royal Society of Chemistry journal article supplement (doi:10.1039/d1sc06025b), 2021-12-27
Supplement: d1sc06025b1.pdf [file d1sc06025b1.pdf]

# Asymmetric Synthesis of Isochromanone Derivatives via Trapping Carboxylic Oxonium Ylides and Aldol Cascade

Jiawen Lang, Siyuan Wang, Changli He, Xiaohua Liu\*, and Xiaoming Feng \*

*Key Laboratory of Green Chemistry & Technology, Ministry of Education, College of Chemistry, Sichuan University, Chengdu 610064, China*

E-mail: liuxh@scu.edu.cn, xmfeng@scu.edu.cn

## Table of Contents

|                                                                             |     |
|-----------------------------------------------------------------------------|-----|
| Table of Contents .....                                                     | 1   |
| (A) General information.....                                                | 2   |
| (B) Preparation of the substrates .....                                     | 2   |
| (C) Optimization of reaction conditions .....                               | 4   |
| (D) Experimental procedures .....                                           | 8   |
| (E) The analytical and spectral characterization data of the products.....  | 9   |
| (F) Large scale experiment.....                                             | 46  |
| (G) The transformations of the product .....                                | 47  |
| (H) Control experiments .....                                               | 47  |
| (I) $pK_{aH}$ prediction via XGBoost.....                                   | 50  |
| (J) X-ray crystal structure of the product C1 and F3.....                   | 51  |
| (K) Copy of $^1H$ , $^{13}C\{^1H\}$ , and $^{19}F\{^1H\}$ NMR Spectra. .... | 52  |
| (L) References .....                                                        | 112 |

## (A) General information

$^1\text{H}$  NMR spectra were recorded on commercial instruments (400 MHz or 600 MHz). Chemical shifts were reported in ppm from tetramethylsilane with the solvent resonance as the internal standard ( $\text{CDCl}_3$ ,  $\delta = 7.26$ ,  $\text{DMSO}-d_6$ ,  $\delta = 2.50$ ). Spectra were reported as follows: chemical shift ( $\delta$  ppm), multiplicity (s = singlet, d = doublet, t = triplet, q = quartet, m = multiplet, dd = doublet of doublets), coupling constants (Hz), integration and assignment.

$^{13}\text{C}\{^1\text{H}\}$  NMR spectra were collected on commercial instruments (101 MHz or 151 MHz) with complete proton decoupling. Chemical shifts are reported in ppm from the tetramethylsilane with the solvent resonance as internal standard ( $\text{CDCl}_3$ ,  $\delta = 77.0$ ,  $\text{DMSO}-d_6$ ,  $\delta = 39.5$ ).

$^{19}\text{F}\{^1\text{H}\}$  NMR spectra were collected at 376 MHz with complete proton decoupling.

Enantiomeric excesses (ee) were determined by HPLC analysis using the corresponding commercial chiralpak column as stated in the experimental procedures at 25 °C.

Optical rotations were measured with a Perkin-Elmer model 241 polarimeter and reported as follows:

$[\alpha]_D^{25}$  (c: g/100 mL, in  $\text{CHCl}_3$ , unless otherwise noted,  $\lambda = 589$  nm).

HRMS was recorded on a commercial apparatus (ESI Source).

IR spectra were recorded on SHIMADZU IR Tracer-100 FT-IR spectrophotometer.

Chromatography: Qingdao Haiyang silica gel, HG/T2354-92, HCP.

Solvents:  $\text{Et}_2\text{O}$  (diethyl ether), THF (tetrahydrofuran), and toluene were freshly distilled from sodium metal prior to use. EtOAc (ethyl acetate),  $\text{CHCl}_3$ ,  $\text{CH}_2\text{Cl}_2$ ,  $\text{CH}_2\text{ClCH}_2\text{Cl}$ ,  $\text{CHCl}_2\text{CH}_2\text{Cl}$  and  $\text{CHCl}_2\text{CHCl}_2$  were freshly distilled from  $\text{CaH}_2$  prior to use.

The preparation of acids<sup>1</sup>, diazoketones<sup>2</sup> and ligands<sup>3</sup> followed the literature.

## (B) Preparation of the substrates

General procedure for the synthesis of 2-acetylbenzoic acids **A21-A25**<sup>1a</sup> and 2-cinnamoylbenzoic acids **A1-A19**<sup>1b</sup>.

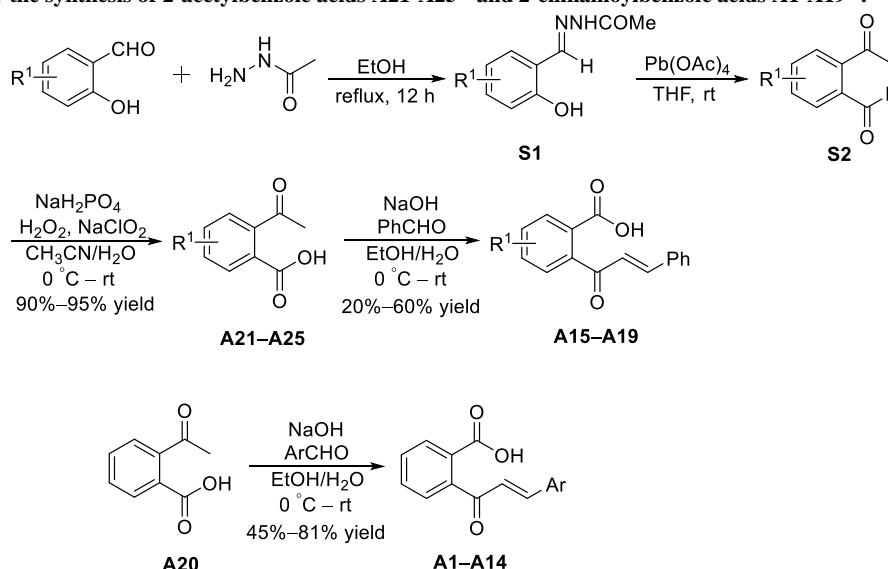

**General procedure 1:** To a stirred solution of salicylaldehyde derivative (30 mmol) in EtOH (150 mL) at room temperature was added acetophenone hydrazone (2.22 g, 30.0 mmol), and the reaction was heated to reflux for 12 h. Upon completion, the mixture was cooled to room temperature, concentrated and washed with PE. The crude **S1** was directly used in the next step without purification.

Product **S1** (30 mmol) was dissolved in 150 mL THF, then Pb(OAc)<sub>4</sub> (14.64 g, 33 mmol) was added slowly in portions while stirring. The reaction was stirred at room temperature for 2–3 h. After completion, the mixture was filtered and then the solvent was removed under reduced pressure. The residue was dissolved in 400 mL of EtOAc and washed with water (3x70 mL). The combined organic phases were successively washed with saturated aqueous NaHCO<sub>3</sub> and brine. The combined organic layers were dried over anhydrous Na<sub>2</sub>SO<sub>4</sub>, filtered and evaporated. The crude was purified by column chromatography on silica gel (PE/EtOAc = 15/1) to give product **S2**.

To a stirred solution of **S2** (18 mmol) in MeCN (180 mL) at 0 °C was successively added NaH<sub>2</sub>PO<sub>4</sub> (0.96 g, 6.18 mmol), H<sub>2</sub>O<sub>2</sub> (35% in H<sub>2</sub>O, 5.2 mL) and NaClO<sub>2</sub> (6.48 g, 72 mmol). The reaction mixture was vigorously stirred at 0 °C for 1 h and at room temperature for 2 h. After completion, the reaction mixture were added EtOAc (120 mL) and water (75 mL). The organic layer was separated, and the aqueous layer was extracted by EtOAc (3x50 mL). The combined organic layer was washed with water and brine, dried over anhydrous Na<sub>2</sub>SO<sub>4</sub>, filtered and evaporated. The resulting acid substrates **A21-A25** are generally pure enough to use without further purification unless other notification.

Substrates **A15-A19** were implemented following reported methods with modification<sup>1b</sup>. To a solution of compounds **A21-A25** (15 mmol) and corresponding aldehyde (18 mmol) in ethanol (15 mL) was added an aqueous solution of NaOH (4.0 M, 2.0 equiv) at 0 °C. The ice-bath was removed, and the reaction stirred at room temperature until complete consumption of starting material. The reaction was then acidified with 6 M HCl aqueous solution at 0 °C. Then the EtOH was removed completely by rotoevaporation and the remaining aqueous layer was extracted with EtOAc, the combined organic layers were dried over anhydrous Na<sub>2</sub>SO<sub>4</sub> and concentrated under reduced pressure. The crude solids were further purified by trituration using dichloromethane, ethanol and petroleum ether to provide pure ketoacids **A15-A19**.

Substrates **A1-A14** were synthesized as the same condition with those of **A15-A19**.

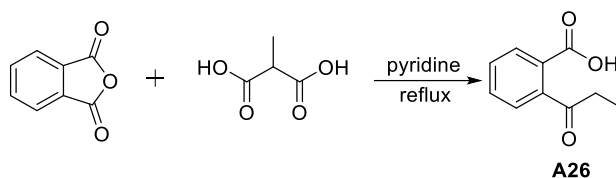

**General procedure 2<sup>1c</sup>:** A mixture of phthalic anhydride (12 mmol), malonic acid (10 mmol) and pyridine (0.79 g, 10 mmol) was refluxed for 3 h to 5 h. Upon completion, the resulting mixture was cooled to room temperature, and then water (9 mL) was added and the mixture was stirred for 30 min. The solution was treated with concentrated HCl to pH 3-4, extracted with ethyl acetate (2×10 mL). The organic layers were combined, dried over Na<sub>2</sub>SO<sub>4</sub> and evaporated under reduced pressure. The crude compound were further purified by trituration using dichloromethane, ethanol and petroleum ether to provide pure acid **A26**.

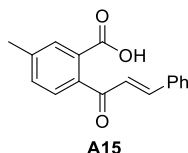

#### 2-cinnamoyl-5-methylbenzoic acid (A15)

Compound **A15** was obtained according to the general procedure 1 as a pale green solid (20% yield).

<sup>1</sup>H NMR (400 MHz, CDCl<sub>3</sub>) δ 9.62 (s, 1H), 7.98 (d, *J* = 8.0 Hz, 1H), 7.49 – 7.47 (m, 2H), 7.37 – 7.32 (m, 4H), 7.18 – 7.13 (m, 2H), 7.00 (d, *J* = 16.4 Hz, 1H), 2.44 (s, 3H);

<sup>13</sup>C{<sup>1</sup>H} NMR (101 MHz, CDCl<sub>3</sub>) δ 197.4, 171.0, 145.6, 144.3, 142.8, 134.3, 131.2, 130.5, 130.2, 128.8, 128.4, 128.1, 127.7, 124.9, 21.6 ppm;

**m.p.** 150.2 – 154.3 °C;

**HRMS** (ESI) *m/z* [M+Na]<sup>+</sup> calcd for C<sub>17</sub>H<sub>14</sub>O<sub>3</sub>Na: 289.0835, found: 289.0837;

**IR** (neat): 3028, 2921, 2653, 1689, 1648, 1600, 1495, 1447, 1408, 1287, 1193, 1126, 1059, 973, 866, 839, 787, 716, 604, 481, 456 cm<sup>-1</sup>.

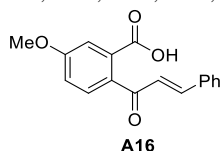

#### 2-cinnamoyl-5-methoxybenzoic acid (A16)

Compound **A16** was obtained according to the general procedure 1 as a pale yellow solid (36% yield).

<sup>1</sup>H NMR (400 MHz, CDCl<sub>3</sub>) δ 9.45 (s, 1H), 8.05 (d, *J* = 8.8 Hz, 1H), 7.49 – 7.46 (m, 2H), 7.37 – 7.33 (m, 3H), 7.14 (d, *J* = 16.4 Hz, 1H), 7.01 – 6.96 (m, 2H), 6.82 (d, *J* = 2.4 Hz, 1H), 3.88 (s, 3H);

<sup>13</sup>C{<sup>1</sup>H} NMR (101 MHz, CDCl<sub>3</sub>) δ 196.9, 170.5, 163.4, 145.6, 145.2, 134.3, 133.4, 130.6, 128.8, 128.4, 127.6, 119.4, 114.6, 112.9, 55.7 ppm;

**m.p.** 155.1 – 158.7 °C;

**HRMS** (ESI) *m/z* [M+Na]<sup>+</sup> calcd for C<sub>17</sub>H<sub>14</sub>O<sub>4</sub>Na: 305.0784, found: 305.0784;

**IR** (neat): 3054, 2934, 2655, 2361, 1676, 1596, 1572, 1406, 1332, 1283, 1237, 1176, 1025, 841, 762, 690, 597, 556, 485 cm<sup>-1</sup>.

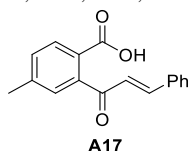

#### 2-cinnamoyl-4-methylbenzoic acid (A17)

Compound **A17** was obtained according to the general procedure 1 as a white solid (34% yield).

<sup>1</sup>H NMR (600 MHz, DMSO-*d*<sub>6</sub>) δ 13.12 (s, 1H), 7.70 – 7.68 (m, 3H), 7.49 (d, *J* = 7.8 Hz, 1H), 7.43 – 7.39 (m, 4H), 7.22 – 7.16 (m, 2H), 2.42 (s, 3H);

<sup>13</sup>C{<sup>1</sup>H} NMR (151 MHz, DMSO-*d*<sub>6</sub>) δ 195.2, 167.9, 143.7, 140.0, 138.4, 134.3, 132.2, 130.9, 130.6, 130.0, 129.0, 128.5, 127.8, 127.3, 20.7 ppm;

**m.p.** 190.1 – 194.2 °C;

**HRMS** (ESI) *m/z* [M+Na]<sup>+</sup> calcd for C<sub>17</sub>H<sub>14</sub>O<sub>3</sub>Na: 289.0835, found: 289.0839;

**IR** (neat): 2986, 2816, 2661, 2577, 2361, 1681, 1651, 1496, 1448, 1306, 1280, 1209, 1056, 970, 832, 766, 584, 457 cm<sup>-1</sup>.

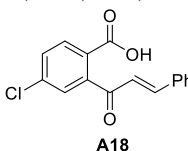

#### 4-chloro-2-cinnamoylbenzoic acid (A18)

Compound **A18** was obtained according to the general procedure 1 as a white solid (32% yield).

<sup>1</sup>H NMR (600 MHz, DMSO-*d*<sub>6</sub>) δ 7.89 (d, *J* = 2.4 Hz, 1H), 7.76 (dd, *J* = 8.4, 2.4 Hz, 1H), 7.71 – 7.70 (m, 2H), 7.55 (d, *J* = 8.4 Hz, 1H), 7.44 – 7.39 (m, 3H), 7.25 – 7.18 (m, 2H);

<sup>13</sup>C{<sup>1</sup>H} NMR (151 MHz, DMSO-*d*<sub>6</sub>) δ 194.6, 166.4, 144.7, 139.9, 134.5, 134.2, 132.6, 131.8, 130.7, 129.6, 129.3, 129.0, 128.6, 127.0 ppm;

**m.p.** 185.9 – 190.7 °C;

**HRMS** (ESI) *m/z* [M+Na]<sup>+</sup> calcd for C<sub>16</sub>H<sub>11</sub><sup>34.9689</sup>ClO<sub>3</sub>Na: 309.0289, found: 309.0290;

**HRMS** (ESI) *m/z* [M+Na]<sup>+</sup> calcd for C<sub>16</sub>H<sub>11</sub><sup>36.9659</sup>ClO<sub>3</sub>Na: 311.0260, found: 311.0255;

**IR** (neat): 3008, 2633, 2361, 1703, 1645, 1623, 1593, 1449, 1277, 1261, 1211, 1104, 1029, 833, 797, 763, 688, 574 cm<sup>-1</sup>.

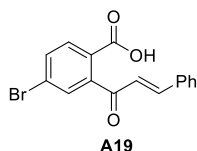

#### 4-bromo-2-cinnamoylbenzoic acid (A19)

Compound **A19** was obtained according to the general procedure 1 as a white solid (20% yield).

<sup>1</sup>H NMR (600 MHz, DMSO-*d*<sub>6</sub>) δ 8.03 (d, *J* = 2.4 Hz, 1H), 7.90 (dd, *J* = 8.4, 2.4 Hz, 1H), 7.73 – 7.68 (m, 2H), 7.48 (d, *J* = 8.4 Hz, 1H), 7.44 – 7.39 (m, 3H), 7.25 – 7.17 (m, 2H);

<sup>13</sup>C{<sup>1</sup>H} NMR (151 MHz, DMSO-*d*<sub>6</sub>) δ 194.7, 166.2, 144.7, 140.2, 134.7, 134.2, 132.6, 132.1, 130.7, 129.8, 129.0, 128.7, 127.0, 123.0 ppm;

m.p. 209.8 – 212.1 °C;

HRMS (ESI) *m/z* [M+Na]<sup>+</sup> calcd for C<sub>16</sub>H<sub>11</sub><sup>78,9183</sup>BrO<sub>3</sub>Na: 352.9784, found: 352.9787;

HRMS (ESI) *m/z* [M+Na]<sup>+</sup> calcd for C<sub>16</sub>H<sub>11</sub><sup>80,9163</sup>BrO<sub>3</sub>Na: 354.9763, found: 354.9765;

IR (neat): 3307, 2988, 2937, 2361, 2338, 1719, 1611, 1424, 1372, 1334, 1276, 1198, 1142, 1035, 964, 883, 751, 695, 570, 471 cm<sup>-1</sup>.

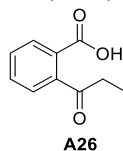

#### 2-propionylbenzoic acid (A26)

Compound **A26** was obtained according to the general procedure 2 as a white solid (78% yield).

<sup>1</sup>H NMR (400 MHz, CDCl<sub>3</sub>) δ 7.79 (d, *J* = 7.6 Hz, 1H), 7.67 (td, *J* = 7.6, 1.2 Hz, 1H), 7.55 – 7.49 (m, 2H), 4.89 (s, 1H), 2.21 (s, 2H), 0.88 (t, *J* = 7.2 Hz, 3H);

<sup>13</sup>C{<sup>1</sup>H} NMR (151 MHz, DMSO-*d*<sub>6</sub>) δ 168.1, 149.2, 134.7, 130.3, 126.7, 124.5, 122.8, 108.7, 31.5, 7.8 ppm;

m.p. 93.5 – 98.0 °C;

HRMS (ESI) *m/z* [M]<sup>-</sup> calcd for C<sub>10</sub>H<sub>9</sub>O<sub>3</sub>: 177.0546, found: 177.0549;

IR (neat): 3361, 2980, 2941, 2361, 2337, 1740, 1461, 1416, 1380, 1344, 1276, 1262, 1135, 1061, 897, 761, 697 cm<sup>-1</sup>.

### (C) Optimization of reaction conditions

**Table S1.** The screening of ligands.

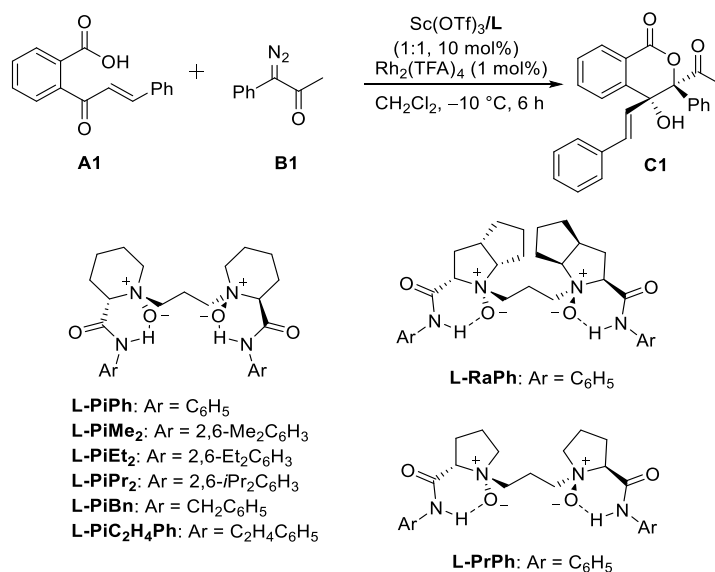

| entry <sup>a</sup> | ligand                    | yield (%) <sup>b</sup> | ee (%) <sup>c</sup> |
|--------------------|---------------------------|------------------------|---------------------|
| 1                  | <b>L-PiPh</b>             | 40                     | 66                  |
| 2 <sup>d</sup>     | <b>L-RaPh</b>             | 20                     | 2                   |
| 3                  | <b>L-PrPh</b>             | 34                     | 6                   |
| 4                  | <b>L-PiPr<sub>2</sub></b> | 26                     | 0                   |
| 5                  | <b>L-PiEt<sub>2</sub></b> | 24                     | 0                   |
| 6                  | <b>L-PiMe<sub>2</sub></b> | 25                     | 8                   |
| 7                  | <b>L-PiBn</b>             | 66                     | 94                  |



<sup>a</sup> Unless otherwise noted, the reactions were performed with **A1** (0.10 mmol), **B1** (2.0 equiv), Sc(OTf)<sub>3</sub> (10 mol%), **Ligand** (10 mol%), Rh<sub>2</sub>(TFA)<sub>4</sub> (1 mol%), in CH<sub>2</sub>Cl<sub>2</sub> (2.0 mL) at -10 °C for 6 h. <sup>b</sup> Isolated yield. <sup>c</sup> Determined by chiral HPLC.

**Table S2.** The screening of metal salts.

| entry <sup>a</sup> | metal salts          | yield (%) <sup>b</sup> | ee (%) <sup>c</sup> |
|--------------------|----------------------|------------------------|---------------------|
| 1                  | Sc(OTf) <sub>3</sub> | 75                     | 97                  |
| 2                  | Ni(OTf) <sub>2</sub> | 29                     | 60                  |
| 3                  | Mg(OTf) <sub>2</sub> | 22                     | 49                  |
| 4                  | Cu(OTf) <sub>2</sub> | 26                     | 6                   |
| 5                  | Zn(OTf) <sub>2</sub> | 37                     | 20                  |
| 6                  | Fe(OTf) <sub>3</sub> | 84                     | 97                  |
| 7                  | Co(OTf) <sub>2</sub> | 57                     | 80                  |
| 8                  | Fe(OTf) <sub>2</sub> | 67                     | 0                   |

<sup>a</sup> Unless otherwise noted, the reactions were performed with **A1** (0.10 mmol), **B1** (2.0 equiv), metal salts (10 mol%), **L-PiC<sub>2</sub>H<sub>4</sub>Ph** (10 mol%), Rh<sub>2</sub>(TFA)<sub>4</sub> (1 mol%), in CH<sub>2</sub>Cl<sub>2</sub> (2.0 mL) at -10 °C for 6 h. <sup>b</sup> Isolated yield. <sup>c</sup> Determined by chiral HPLC.

**Table S3.** The screening of temperature.

| entry <sup>a</sup> | T (°C) | yield (%) <sup>b</sup> | ee (%) <sup>c</sup> |
|--------------------|--------|------------------------|---------------------|
| 1                  | 10     | 88                     | 92                  |
| 2                  | 0      | 83                     | 97                  |
| 3                  | -10    | 84                     | 97                  |
| 4                  | -20    | 84                     | 97                  |

<sup>a</sup> Unless otherwise noted, the reactions were performed with **A1** (0.10 mmol), **B1** (2.0 equiv), Fe(OTf)<sub>3</sub> (10 mol%), **L-PiC<sub>2</sub>H<sub>4</sub>Ph** (10 mol%), Rh<sub>2</sub>(TFA)<sub>4</sub> (1 mol%), in CH<sub>2</sub>Cl<sub>2</sub> (2.0 mL) at T °C for 6 h. <sup>b</sup> Isolated yield. <sup>c</sup> Determined by chiral HPLC.

**Table S4.** The screening of solvents.

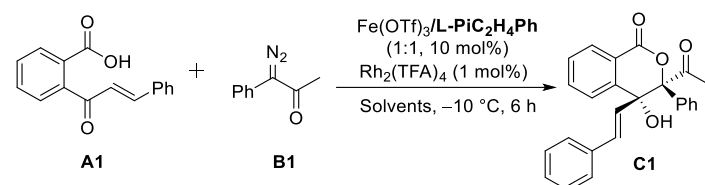

| entry <sup>a</sup> | solvents                             | yield (%) <sup>b</sup> | ee (%) <sup>c</sup> |
|--------------------|--------------------------------------|------------------------|---------------------|
| 1                  | THF                                  | 10                     | 4                   |
| 2                  | EtOAc                                | 32                     | 0                   |
| 3                  | Toluene                              | 11                     | 6                   |
| 4                  | Et <sub>2</sub> O                    | 54                     | 95                  |
| 5                  | CH <sub>2</sub> Cl <sub>2</sub>      | 84                     | 97                  |
| 6                  | CHCl <sub>3</sub>                    | 80                     | 91                  |
| 7                  | CH <sub>2</sub> ClCH <sub>2</sub> Cl | 78                     | 97                  |
| 8                  | CHCl <sub>2</sub> CH <sub>2</sub> Cl | 31                     | 5                   |
| 9                  | CHCl <sub>2</sub> CHCl <sub>2</sub>  | 82                     | 96                  |

<sup>a</sup> Unless otherwise noted, the reactions were performed with **A1** (0.10 mmol), **B1** (2.0 equiv), Fe(OTf)<sub>3</sub> (10 mol%), **L-PiC<sub>2</sub>H<sub>4</sub>Ph** (10 mol%), Rh<sub>2</sub>(TFA)<sub>4</sub> (1 mol%), in Solvents (2.0 mL) at -10 °C for 6 h. <sup>b</sup> Isolated yield. <sup>c</sup> Determined by chiral HPLC.

**Table S5.** The screening of counter ion of Fe(III) salt.

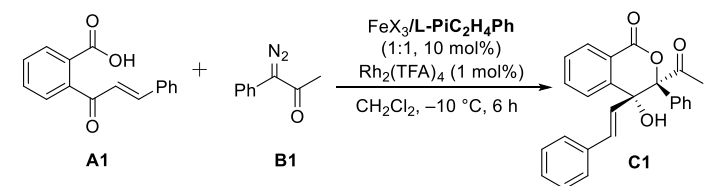

| entry <sup>a</sup> | FeX <sub>3</sub>     | yield (%) <sup>b</sup> | ee (%) <sup>c</sup> |
|--------------------|----------------------|------------------------|---------------------|
| 1                  | FeCl <sub>3</sub>    | 85                     | -8                  |
| 2                  | Fe(NTf) <sub>3</sub> | 78                     | 88                  |
| 3                  | Fe(OTf) <sub>3</sub> | 84                     | 97                  |

<sup>a</sup> Unless otherwise noted, the reactions were performed with **A1** (0.10 mmol), **B1** (2.0 equiv), FeX<sub>3</sub> (10 mol%), **L-PiC<sub>2</sub>H<sub>4</sub>Ph** (10 mol%), Rh<sub>2</sub>(TFA)<sub>4</sub> (1 mol%), in CH<sub>2</sub>Cl<sub>2</sub> (2.0 mL) at -10 °C for 6 h. <sup>b</sup> Isolated yield. <sup>c</sup> Determined by chiral HPLC.

**Table S6.** The screening of ratio between Fe(OTf)<sub>3</sub> and **L-PiC<sub>2</sub>H<sub>4</sub>Ph**.

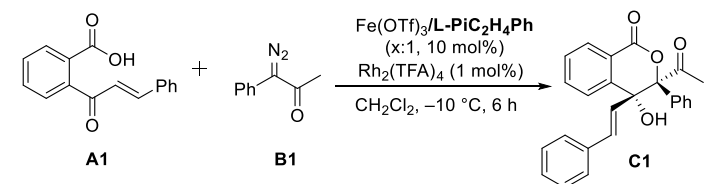

| entry <sup>a</sup> | x:1   | yield (%) <sup>b</sup> | ee (%) <sup>c</sup> |
|--------------------|-------|------------------------|---------------------|
| 1                  | 0.8:1 | 82                     | 96                  |
| 2                  | 1:1   | 84                     | 97                  |
| 3                  | 1.2:1 | 91                     | 97                  |
| 4                  | 1.5:1 | 85                     | 95                  |

<sup>a</sup> Unless otherwise noted, the reactions were performed with **A1** (0.10 mmol), **B1** (2.0 equiv), Fe(OTf)<sub>3</sub> (10x mol%), **L-PiC<sub>2</sub>H<sub>4</sub>Ph** (10 mol%), Rh<sub>2</sub>(TFA)<sub>4</sub> (1 mol%), in CH<sub>2</sub>Cl<sub>2</sub> (2.0 mL) at -10 °C for 6 h. <sup>b</sup> Isolated yield. <sup>c</sup> Determined by chiral HPLC.

**Table S8.** The screening of other ligands

**A1** + **B1**  $\xrightarrow[\text{CH}_2\text{Cl}_2, -10\text{ }^\circ\text{C}, 6\text{ h}]{\text{Fe(OTf)}_3/\text{L} (1.2:1, 10\text{ mol}\%), \text{Rh}_2(\text{TFA})_4 (1\text{ mol}\%)}$  **C1**

**L1**

**L2**

**L3**

**L4**

**L5**

**L6**

**L-PiC<sub>2</sub>H<sub>4</sub>Ph:**  
R = C<sub>2</sub>H<sub>4</sub>Ph

| entry <sup>a</sup> | <b>L</b>                                | yield (%) <sup>b</sup> | ee (%) <sup>c</sup> |
|--------------------|-----------------------------------------|------------------------|---------------------|
| 1                  | <b>L1</b>                               | 20                     | 5                   |
| 2                  | <b>L2</b>                               | Trace                  | —                   |
| 3                  | <b>L3</b>                               | 26                     | 0                   |
| 4 <sup>d</sup>     | <b>L4</b>                               | 23                     | 0                   |
| 5                  | <b>L5</b>                               | 24                     | 0                   |
| 6                  | <b>L6</b>                               | 21                     | 0                   |
| 7                  | <b>L-PiC<sub>2</sub>H<sub>4</sub>Ph</b> | 91                     | 97                  |

<sup>a</sup> Unless otherwise noted, the reactions were performed with **A1** (0.10 mmol), **B1** (2.0 equiv), Fe(OTf)<sub>3</sub> (12 mol%), **L** (10 mol%), Rh<sub>2</sub>(TFA)<sub>4</sub> (1 mol%), in CH<sub>2</sub>Cl<sub>2</sub> (2.0 mL) at -10 °C for 6 h. <sup>b</sup> Isolated yield. <sup>c</sup> Determined by chiral HPLC. <sup>d</sup> Without using of Fe(OTf)<sub>3</sub> and Rh<sub>2</sub>(TFA)<sub>4</sub>.

**Table S7.** The screening of amount of Fe(OTf)<sub>3</sub> and **L-PiC<sub>2</sub>H<sub>4</sub>Ph**.

**A1** + **B1**  $\xrightarrow[\text{CH}_2\text{Cl}_2, -10\text{ }^\circ\text{C}, 6\text{ h}]{\text{Fe(OTf)}_3/\text{L-PiC}_2\text{H}_4\text{Ph} (1.2:1, x\text{ mol}\%), \text{Rh}_2(\text{TFA})_4 (1\text{ mol}\%)}$  **C1**

| entry <sup>a</sup> | x  | yield (%) <sup>b</sup> | ee (%) <sup>c</sup> |
|--------------------|----|------------------------|---------------------|
| 1                  | 10 | 91                     | 97                  |
| 2                  | 5  | 91                     | 97                  |
| 3                  | 2  | 91                     | 97                  |

<sup>a</sup> Unless otherwise noted, the reactions were performed with **A1** (0.10 mmol), **B1** (2.0 equiv), Fe(OTf)<sub>3</sub> (1.2x mol%), **L-PiC<sub>2</sub>H<sub>4</sub>Ph** (x mol%), Rh<sub>2</sub>(TFA)<sub>4</sub> (1 mol%), in CH<sub>2</sub>Cl<sub>2</sub> (2.0 mL) at -10 °C for 6 h. <sup>b</sup> Isolated yield. <sup>c</sup> Determined by chiral HPLC.

**Table S9.** The screening of rhodium source.

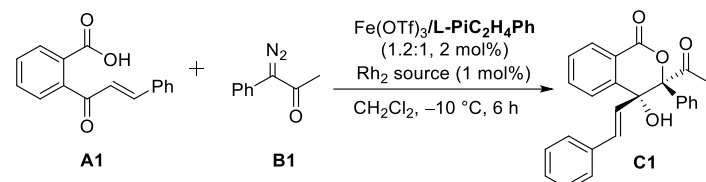

| entry <sup>a</sup> | Rh <sub>2</sub> source             | yield (%) <sup>b</sup> | ee (%) <sup>c</sup> |
|--------------------|------------------------------------|------------------------|---------------------|
| 1                  | Rh <sub>2</sub> (TFA) <sub>4</sub> | 91                     | 97                  |
| 2                  | Rh <sub>2</sub> (Oct) <sub>4</sub> | 59                     | 93                  |
| 3                  | Rh <sub>2</sub> (OAc) <sub>4</sub> | 76                     | 94                  |
| 4                  | Rh <sub>2</sub> (esp) <sub>4</sub> | 64                     | 93                  |
| 5                  | Rh <sub>2</sub> (piv) <sub>4</sub> | 68                     | 94                  |

<sup>a</sup> Unless otherwise noted, the reactions were performed with **A1** (0.10 mmol), **B1** (2.0 equiv), Fe(OTf)<sub>3</sub> (2.4 mol%), **L-PiC<sub>2</sub>H<sub>4</sub>Ph** (2 mol%), Rh<sub>2</sub> source (1 mol%), in CH<sub>2</sub>Cl<sub>2</sub> (2.0 mL) at -10 °C for 6 h. <sup>b</sup> Isolated yield. <sup>c</sup> Determined by chiral HPLC.

## (D) Experimental procedures

### General procedure for the preparation of the racemic products.

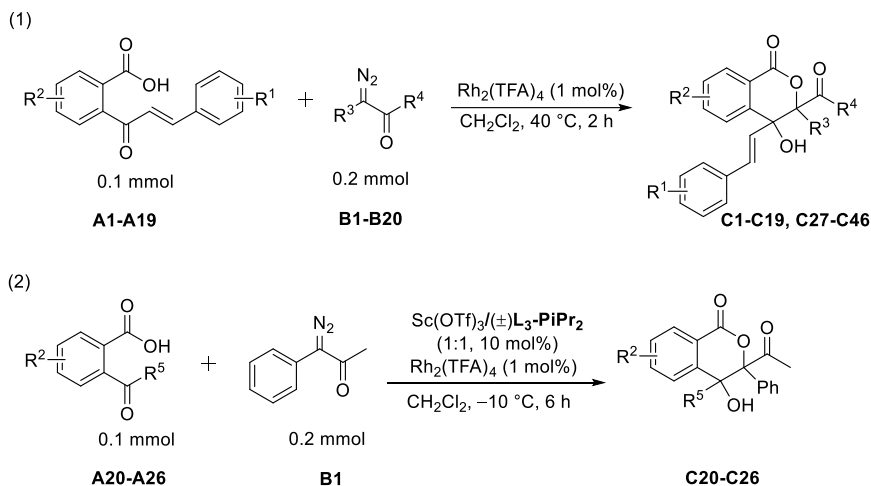

General produce for (1): To a test tube, Rh<sub>2</sub>(TFA)<sub>4</sub> (1 mol%) and the substrates **A1-A19** (0.10 mmol) were added under an N<sub>2</sub> atmosphere. Then CH<sub>2</sub>Cl<sub>2</sub> was added and the mixture was stirred at 40 °C, and a solution of the corresponding α-diazo ketones **B1-B20** (0.20 mmol in 1.0 mL CH<sub>2</sub>Cl<sub>2</sub>) was added. After the addition was completed, the reaction was stirred at 40 °C for 2 h, The crude reaction mixture was purified using column chromatography on silica gel (PE/CH<sub>2</sub>Cl<sub>2</sub> = 1:1) to afford racemic products.

General produce for (2): To an oven-dried reaction tube under nitrogen atmosphere were added the Sc(OTf)<sub>3</sub> (4.9 mg, 10 mol %), (±)**L<sub>3</sub>-PiPr<sub>2</sub>** (6.5 mg, 10 mol %), and CH<sub>2</sub>Cl<sub>2</sub> (1.0 mL). The mixture was stirred at 35 °C for 30 min. Then the solution was evaporated in vacuo and nitrogen was introduced. After that, CH<sub>2</sub>Cl<sub>2</sub> (1.0 mL), Rh<sub>2</sub>(TFA)<sub>4</sub> (0.7 mg, 1 mol %), acids **A20-A26** (0.10 mmol) were added subsequently. The reaction mixture was stirred at 35 °C for 20 min. After the solution was cooled to -10 °C, α-diazo ketone **B1** (0.20 mmol in 1.0 mL CH<sub>2</sub>Cl<sub>2</sub>) was added, and the reaction mixture was stirred at -10 °C for 6 h. The reaction system was purified by column chromatography on silica gel (PE/CH<sub>2</sub>Cl<sub>2</sub> = 1:1.5) to afford the desired products.

## Representative experimental procedure for the catalytic asymmetric reactions

(1)

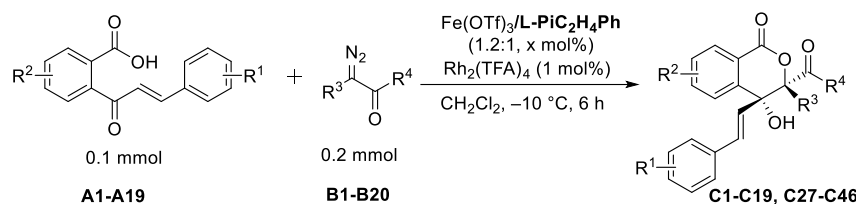

(2)

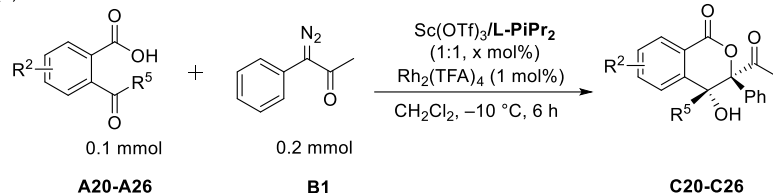

General produce for (1): In a glovebox, ketoacids **A1-A19** (0.1 mmol),  $\text{Rh}_2(\text{TFA})_4$  (0.70 mg, 0.001 mmol, 1 mol%) and  $\text{Fe}(\text{OTf})_3/\text{L-PiC}_2\text{H}_4\text{Ph}$  (1.2:1, x mol%) were weighted into a dried test tube. Anhydrous  $\text{CH}_2\text{Cl}_2$  (1.0 mL) was added and the solution was stirred at  $35^\circ\text{C}$  for 0.5 h. After the solution was cooled to  $-10^\circ\text{C}$ ,  $\alpha$ -diazoketones **B1-B20** (0.20 mmol in 1.0 mL  $\text{CH}_2\text{Cl}_2$ ) was added, the reaction mixture was stirred at  $-10^\circ\text{C}$  for 6 h. The reaction system was purified by column chromatography on silica gel ( $\text{PE}/\text{CH}_2\text{Cl}_2 = 1:1$ ) to afford the desired product.

General produce for (2): The corresponding products **C20-C26** were obtained by using  $\text{Sc}(\text{OTf})_3/\text{L-PiPr}_2$  (1:1, x mol%) as the catalyst in the same reaction conditions.

## (E) The analytical and spectral characterization data of the products

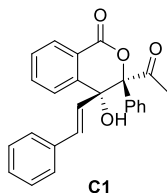

### (3S,4R)-3-acetyl-4-hydroxy-3-phenyl-4-((E)-styryl)isochroman-1-one

The residue was purified by column chromatography on silica gel ( $\text{PE}/\text{CH}_2\text{Cl}_2 = 1/1$ ) to afford the desired product **C1**; 0.1 mmol scale reaction; 34.9 mg, white solid, 91% yield, 97% ee; determined by HPLC analysis [Daicel chiralpak IA, *n*-hexane/*i*-PrOH = 90/10, 1.0 mL/min,  $\lambda = 254$  nm,  $t_1 = 7.08$  min,  $t_2 = 8.72$  min];

$^1\text{H}$  NMR (400 MHz,  $\text{CDCl}_3$ )  $\delta$  8.14 – 8.12 (m, 1H), 7.82 (dd,  $J = 8.0, 1.2$  Hz, 1H), 7.75 – 7.67 (m, 3H), 7.49 (td,  $J = 7.6, 1.2$  Hz, 1H), 7.46 – 7.40 (m, 3H), 7.22 – 7.14 (m, 3H), 7.10 – 7.07 (m, 2H), 6.11 (d,  $J = 15.6$  Hz, 1H), 5.99 (d,  $J = 15.6$  Hz, 1H), 5.26 (s, 1H), 2.14 (s, 3H);

$^{13}\text{C}\{^1\text{H}\}$  NMR (101 MHz,  $\text{CDCl}_3$ )  $\delta$  211.1, 163.0, 146.2, 135.9, 135.7, 132.1, 131.3, 130.2, 129.2, 128.6, 128.4, 128.3, 127.9, 127.7, 126.6, 126.5, 125.1, 122.0, 90.6, 76.8, 27.4 ppm;

m.p.  $136.6 - 139.0^\circ\text{C}$ ;

HRMS (ESI)  $m/z$   $[\text{M}+\text{Na}]^+$  calcd for  $\text{C}_{25}\text{H}_{20}\text{O}_4\text{Na}$ : 407.1254, found: 407.1255;

$[\alpha]_D^{21} = +480.3$  ( $c = 0.38$  in  $\text{CHCl}_3$ );

IR (neat): 3465, 3062, 3027, 2924, 1740, 1706, 1602, 1495, 1451, 1358, 1287, 1248, 1081, 969, 770, 751, 717, 694  $\text{cm}^{-1}$ .

HPLC spectrum of **C1**

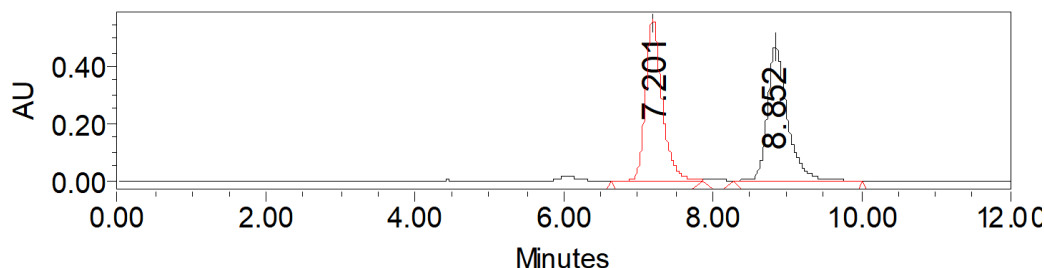

|   | Retention Time | Area    | % Area |
|---|----------------|---------|--------|
| 1 | 7.201          | 8657338 | 49.78  |

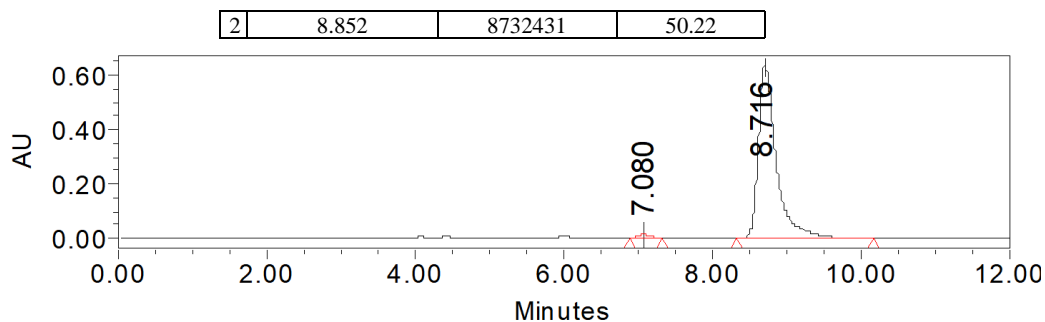

|   | Retention Time | Area     | % Area |
|---|----------------|----------|--------|
| 1 | 7.080          | 173259   | 1.58   |
| 2 | 8.716          | 10823763 | 98.42  |

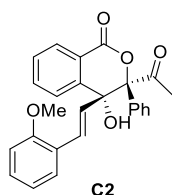

**(3S,4R)-3-acetyl-4-hydroxy-4-((E)-2-methoxystyryl)-3-phenylisochroman-1-one**

The residue was purified by column chromatography on silica gel (PE/EtOAc = 10/1) to afford the desired product **C2**; 0.1 mmol scale reaction; 35.6 mg, white solid, 86% yield, 95% ee; determined by HPLC analysis [Daicel chiralpak IA, *n*-hexane/*i*-PrOH = 90/10, 1.0 mL/min,  $\lambda$  = 254 nm,  $t_1$  = 7.59 min,  $t_2$  = 9.92 min];

$^1\text{H}$  NMR (400 MHz,  $\text{CDCl}_3$ )  $\delta$  8.12 – 8.10 (m, 1H), 7.83 (d,  $J$  = 7.6 Hz, 1H), 7.74 – 7.69 (m, 3H), 7.50 – 7.37 (m, 4H), 7.15 – 7.11 (m, 1H), 7.09 – 7.07 (m, 1H), 6.79 (t,  $J$  = 7.6 Hz, 1H), 6.73 (d,  $J$  = 8.4 Hz, 1H), 6.40 (d,  $J$  = 16.4 Hz, 1H), 6.04 (d,  $J$  = 16.0 Hz, 1H), 5.22 (s, 1H), 3.65 (s, 3H), 2.13 (s, 3H);

$^{13}\text{C}\{^1\text{H}\}$  NMR (101 MHz,  $\text{CDCl}_3$ )  $\delta$  211.2, 163.2, 156.9, 146.5, 135.7, 131.5, 130.1, 129.1, 129.0, 128.4, 128.2, 127.4, 127.2, 126.6, 125.2, 125.1, 122.0, 120.4, 110.8, 90.7, 55.3, 27.5 ppm;

m.p. 84.0 – 87.0 °C;

HRMS (ESI)  $m/z$   $[\text{M}+\text{Na}]^+$  calcd for  $\text{C}_{26}\text{H}_{22}\text{O}_5\text{Na}$ : 437.1359, found: 437.1355;

$[\alpha]_D^{21}$  = +508.3 ( $c$  = 0.40 in  $\text{CHCl}_3$ );

IR (neat): 3465, 3068, 3014, 2938, 2837, 1738, 1706, 1600, 1490, 1459, 1357, 1288, 1247, 1084, 1031, 753, 712  $\text{cm}^{-1}$ .

HPLC spectrum of **C2**

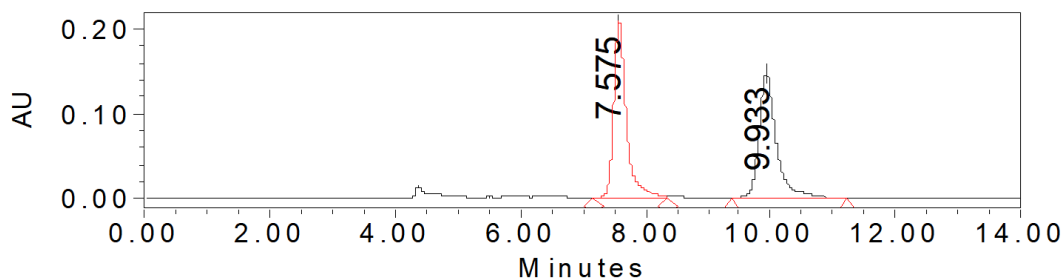

|   | Retention Time | Area    | % Area |
|---|----------------|---------|--------|
| 1 | 7.575          | 2912842 | 50.44  |
| 2 | 9.933          | 2861923 | 49.56  |

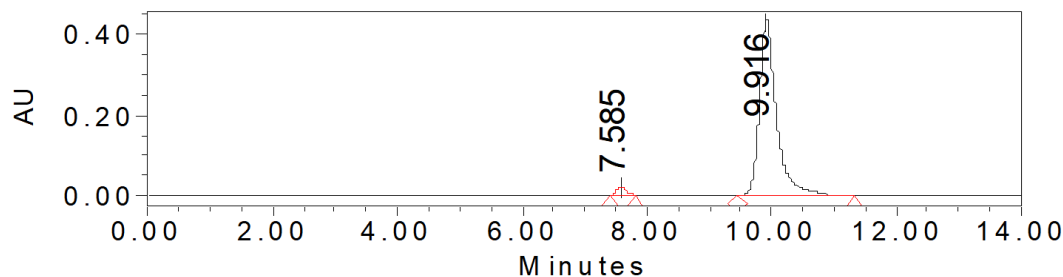

|   | Retention Time | Area    | % Area |
|---|----------------|---------|--------|
| 1 | 7.585          | 221101  | 2.55   |
| 2 | 9.916          | 8464312 | 97.45  |

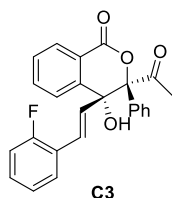

**(3S,4R)-3-acetyl-4-((E)-2-fluorostyryl)-4-hydroxy-3-phenylisochroman-1-one**

The residue was purified by column chromatography on silica gel (PE/CH<sub>2</sub>Cl<sub>2</sub> = 1/1) to afford the desired product **C3**; 0.1 mmol scale reaction; 32.1 mg, white solid, 80% yield, 94% ee; determined by HPLC analysis [Daicel chiralpak IA, *n*-hexane/*i*-PrOH = 90/10, 1.0 mL/min,  $\lambda$  = 254 nm,  $t_1$  = 6.84 min,  $t_2$  = 8.12 min];

<sup>1</sup>H NMR (400 MHz, CDCl<sub>3</sub>)  $\delta$  8.12 (dd,  $J$  = 8.0, 1.2 Hz, 1H), 7.83 – 7.81 (m, 1H), 7.75 – 7.68 (m, 3H), 7.49 (td,  $J$  = 7.6, 1.2 Hz, 1H), 7.45 – 7.40 (m, 3H), 7.15 – 7.10 (m, 2H), 6.98 – 6.94 (m, 1H), 6.92 – 6.87 (m, 1H), 6.32 (d,  $J$  = 16.0 Hz, 1H), 6.12 (dd,  $J$  = 16.0, 1.6 Hz, 1H), 5.26 (d,  $J$  = 1.6 Hz, 1H), 2.14 (s, 3H);

<sup>13</sup>C{<sup>1</sup>H} NMR (101 MHz, CDCl<sub>3</sub>)  $\delta$  211.0, 163.0, 161.5 (d,  $J_{C-F}$  = 251.5 Hz), 146.2, 135.8, 131.3, 130.3, 130.1 (d,  $J_{C-F}$  = 5.1 Hz), 129.3, 129.2, 128.6, 128.3, 127.6 (d,  $J_{C-F}$  = 4.0 Hz), 126.5, 125.1, 124.6 (d,  $J_{C-F}$  = 3.0 Hz), 123.9, 123.9 (d,  $J_{C-F}$  = 11.1 Hz), 121.9, 115.6 (d,  $J_{C-F}$  = 21.2 Hz), 90.5, 76.8, 27.4 ppm;

<sup>19</sup>F{<sup>1</sup>H} NMR (376 MHz, CDCl<sub>3</sub>)  $\delta$  -117.17 ppm;

m.p. 145.2 – 147.1 °C;

HRMS (ESI)  $m/z$  [M+Na]<sup>+</sup> calcd for C<sub>25</sub>H<sub>19</sub>FO<sub>4</sub>Na: 425.1159, found: 425.1158;

[ $\alpha$ ]<sub>D</sub><sup>21</sup> = +522.9 ( $c$  = 0.31 in CHCl<sub>3</sub>);

IR (neat): 3465, 3067, 2924, 1740, 1708, 1603, 1489, 1453, 1358, 1287, 1248, 1083, 755, 706, 573 cm<sup>-1</sup>.

HPLC spectrum of **C3**

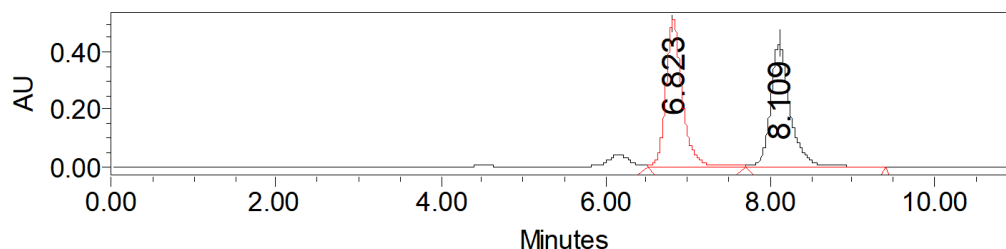

|   | Retention Time | Area    | % Area |
|---|----------------|---------|--------|
| 1 | 6.823          | 7205129 | 50.16  |
| 2 | 8.109          | 7159026 | 49.84  |

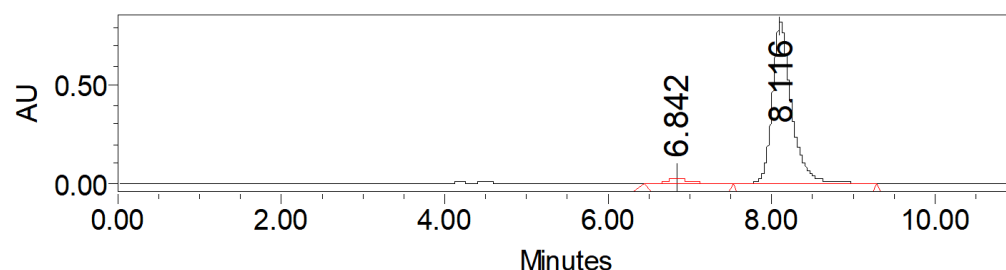

|   | Retention Time | Area     | % Area |
|---|----------------|----------|--------|
| 1 | 6.842          | 387357   | 2.81   |
| 2 | 8.116          | 13407445 | 97.19  |

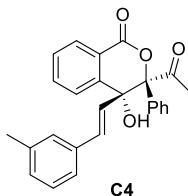

**(3S,4R)-3-acetyl-4-((E)-3-methylstyryl)-4-hydroxy-3-phenylisochroman-1-one**

The residue was purified by column chromatography on silica gel (PE/CH<sub>2</sub>Cl<sub>2</sub> = 1/1) to afford the desired product **C4**; 0.1 mmol scale reaction; 36.2 mg, white solid, 91% yield, 92% ee; determined by HPLC analysis [Daicel chiralpak IA, *n*-hexane/*i*-PrOH = 90/10, 1.0 mL/min,  $\lambda$  = 254 nm,  $t_1$  = 6.07 min,  $t_2$  = 7.31 min];

<sup>1</sup>H NMR (400 MHz, CDCl<sub>3</sub>)  $\delta$  8.13 (d,  $J$  = 7.6 Hz, 1H), 7.81 (d,  $J$  = 8.0 Hz, 1H), 7.75 – 7.68 (m, 3H), 7.51 – 7.39 (m, 4H), 7.09 (t,  $J$  = 7.6 Hz, 1H), 6.98 (d,  $J$  = 7.6 Hz, 1H), 6.91 – 6.89 (m, 2H), 6.08 (d,  $J$  = 16.0 Hz, 1H), 5.97 (d,  $J$  = 16.0 Hz, 1H), 5.25 (s, 1H), 2.24 (s, 3H), 2.14 (s, 3H);

<sup>13</sup>C{<sup>1</sup>H} NMR (101 MHz, CDCl<sub>3</sub>)  $\delta$  211.2, 163.1, 146.3, 137.9, 135.9, 135.7, 132.2, 131.3, 130.2, 129.2, 128.7, 128.5, 128.3, 128.3, 127.4, 127.4, 126.6, 125.1, 123.7, 122.0, 90.6, 76.8, 27.5, 21.2 ppm;

m.p. 71.0 – 73.3 °C;

**HRMS** (ESI)  $m/z$   $[M+Na]^+$  calcd for  $C_{26}H_{22}O_4Na$ : 421.1410, found: 421.1409;

$[\alpha]_D^{20} = +491.7$  ( $c = 1.07$  in  $CHCl_3$ );

**IR** (neat): 3463, 3019, 2855, 1737, 1705, 1602, 1492, 1451, 1357, 1286, 1247, 1215, 1080, 1037, 969, 751, 712, 693, 564  $cm^{-1}$ .

HPLC spectrum of **C4**

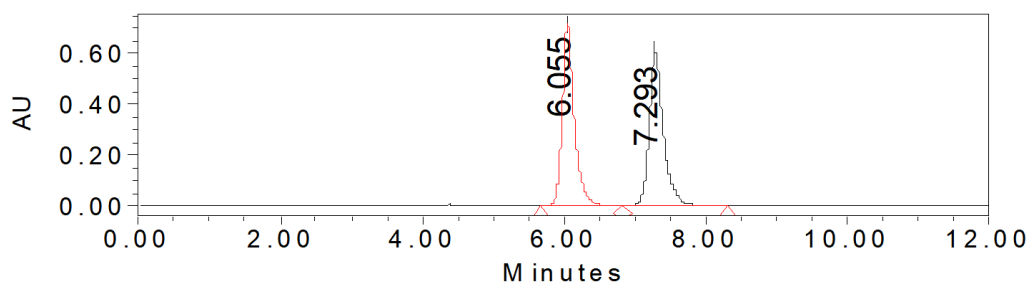

|   | Retention Time | Area    | % Area |
|---|----------------|---------|--------|
| 1 | 6.055          | 8467393 | 49.78  |
| 2 | 7.293          | 8542637 | 50.22  |

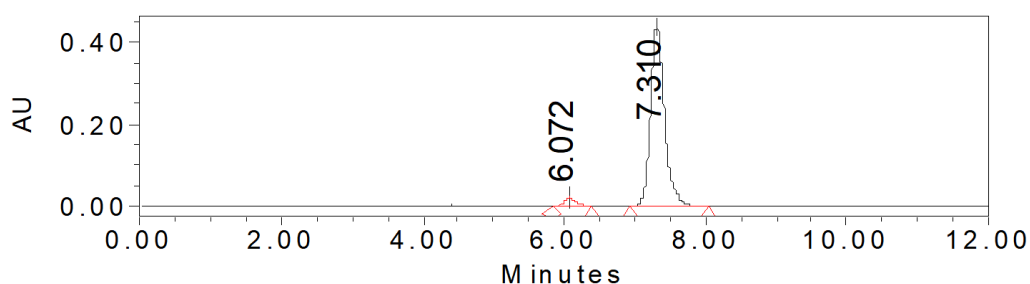

|   | Retention Time | Area    | % Area |
|---|----------------|---------|--------|
| 1 | 6.072          | 249309  | 3.95   |
| 2 | 7.310          | 6059396 | 96.05  |

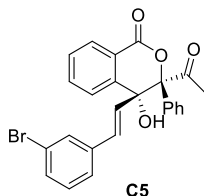

**(3*S*,4*R*)-3-acetyl-4-((*E*)-3-bromostyryl)-4-hydroxy-3-phenylisochroman-1-one**

The residue was purified by column chromatography on silica gel (PE/ $CH_2Cl_2$  = 1/1) to afford the desired product **C5**; 0.1 mmol scale reaction; 23.2 mg, white solid, 50% yield, 95% ee; determined by HPLC analysis [Daicel chiralpak IA, *n*-hexane/*i*-PrOH = 90/10, 1.0 mL/min,  $\lambda$  = 254 nm,  $t_1$  = 6.89 min,  $t_2$  = 8.12 min];

**$^1H$  NMR** (400 MHz,  $CDCl_3$ )  $\delta$  8.12 (d,  $J$  = 7.6 Hz, 1H), 7.80 – 7.78 (m, 1H), 7.73 (t,  $J$  = 7.6 Hz, 1H), 7.67 – 7.65 (m, 2H), 7.49 (t,  $J$  = 7.6 Hz, 1H), 7.45 – 7.42 (m, 3H), 7.29 – 7.26 (m, 1H), 7.21 (s, 1H), 7.07 – 7.03 (m, 1H), 7.00 – 6.98 (m, 1H), 6.07 (d,  $J$  = 16.0 Hz, 1H), 5.99 (d,  $J$  = 16.0 Hz, 1H), 5.26 (s, 1H), 2.13 (s, 3H);

**$^{13}C\{^1H\}$  NMR** (101 MHz,  $CDCl_3$ )  $\delta$  211.0, 162.9, 146.0, 138.1, 135.8, 131.2, 130.8, 130.5, 130.4, 129.9, 129.5, 129.3, 129.1, 128.7, 128.3, 126.5, 125.2, 125.1, 122.5, 121.9, 90.5, 76.6, 27.4 ppm;

**m.p.** 69.8 – 74.2  $^{\circ}C$ ;

**HRMS** (ESI)  $m/z$   $[M+Na]^+$  calcd for  $C_{25}H_{19}^{78,9183}BrO_4Na$ : 485.0359, found: 485.0362;

**HRMS** (ESI)  $m/z$   $[M+Na]^+$  calcd for  $C_{25}H_{19}^{80,9163}BrO_4Na$ : 487.0338, found: 487.0341;

$[\alpha]_D^{20} = +426.1$  ( $c = 0.64$  in  $CHCl_3$ );

**IR** (neat): 3464, 3021, 2925, 1738, 1706, 1600, 1563, 1452, 1357, 1287, 1248, 1210, 1080, 969, 757, 690, 560  $cm^{-1}$ .

HPLC spectrum of **C5**



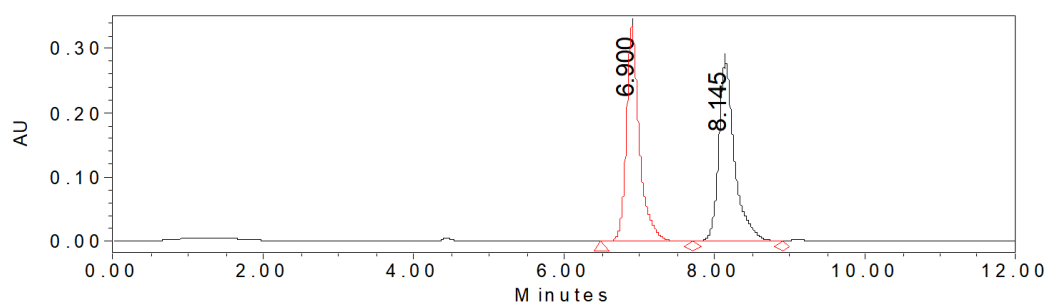

|   | Retention Time | Area    | % Area |
|---|----------------|---------|--------|
| 1 | 6.900          | 4093288 | 49.84  |
| 2 | 8.145          | 4119141 | 50.16  |

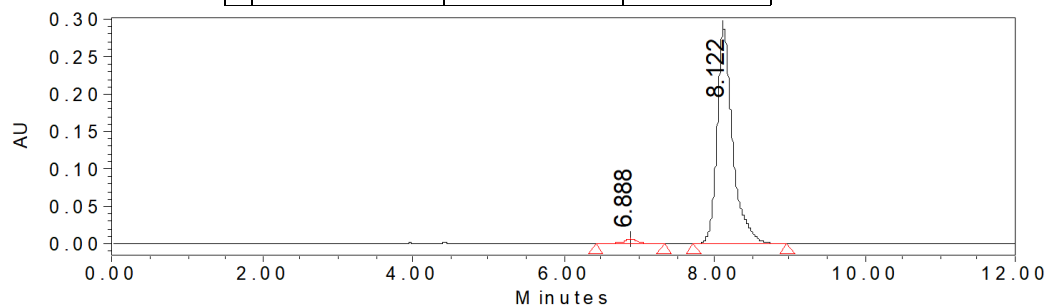

|   | Retention Time | Area    | % Area |
|---|----------------|---------|--------|
| 1 | 6.888          | 104683  | 2.45   |
| 2 | 8.122          | 4172597 | 97.55  |

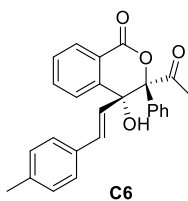

**(3*S*,4*R*)-3-acetyl-4-hydroxy-4-((*E*)-4-methylstyryl)-3-phenylisochroman-1-one**

The residue was purified by column chromatography on silica gel (PE/CH<sub>2</sub>Cl<sub>2</sub> = 1/1) to afford the desired product **C6**; 0.1 mmol scale reaction; 32.3 mg, white solid, 81% yield, 94% ee; determined by HPLC analysis [Daicel chiralpak IA, *n*-hexane/*i*-PrOH = 90/10, 1.0 mL/min,  $\lambda$  = 254 nm,  $t_1$  = 9.52 min,  $t_2$  = 11.00 min];

<sup>1</sup>H NMR (400 MHz, CDCl<sub>3</sub>)  $\delta$  8.13 (dd,  $J$  = 7.6, 1.2 Hz, 1H), 7.82 (dd,  $J$  = 7.6, 1.2 Hz, 1H), 7.75 – 7.68 (m, 3H), 7.49 (td,  $J$  = 7.6, 1.6 Hz, 1H), 7.46 – 7.40 (m, 3H), 7.02 – 6.97 (m, 4H), 6.06 (d,  $J$  = 16.0 Hz, 1H), 5.94 (dd,  $J$  = 16.0, 1.2 Hz, 1H), 5.25 (d,  $J$  = 1.2 Hz, 1H), 2.26 (s, 3H), 2.14 (s, 3H);

<sup>13</sup>C{<sup>1</sup>H} NMR (101 MHz, CDCl<sub>3</sub>)  $\delta$  211.1, 163.0, 146.3, 137.8, 135.7, 133.1, 132.1, 131.3, 130.1, 129.1, 129.0, 128.5, 128.2, 126.7, 126.6, 126.5, 125.1, 122.0, 90.6, 76.8, 27.4, 21.1 ppm;

**m.p.** 72.8 – 76.3 °C;

**HRMS** (ESI)  $m/z$  [M+Na]<sup>+</sup> calcd for C<sub>26</sub>H<sub>22</sub>O<sub>4</sub>Na: 421.1410, found: 421.1397;

$[\alpha]_D^{20}$  = +494.1 ( $c$  = 1.32 in CHCl<sub>3</sub>);

**IR** (neat): 3463, 3023, 2921, 1737, 1705, 1603, 1451, 1357, 1286, 1247, 1211, 1081, 1040, 971, 754, 712, 583 cm<sup>-1</sup>.

HPLC spectrum of **C6**

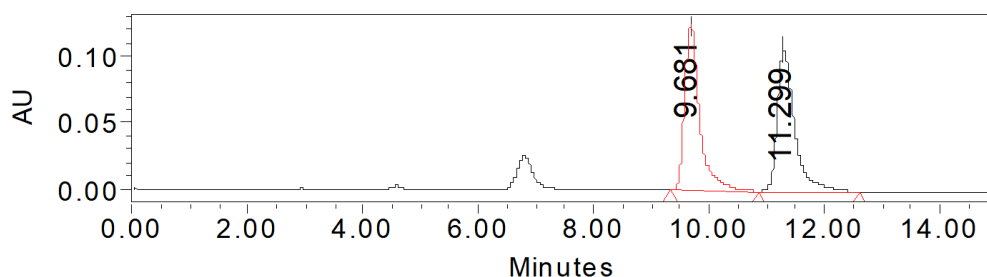

|   | Retention Time | Area    | % Area |
|---|----------------|---------|--------|
| 1 | 9.681          | 2295327 | 50.50  |
| 2 | 11.299         | 2249855 | 49.50  |

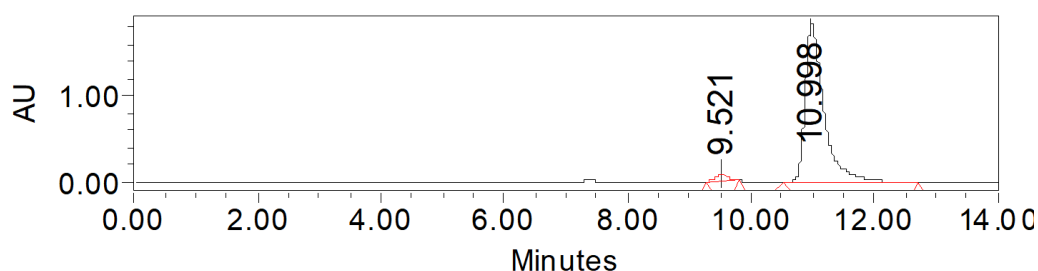

|   | Retention Time | Area     | % Area |
|---|----------------|----------|--------|
| 1 | 9.521          | 1206459  | 3.01   |
| 2 | 10.998         | 38874867 | 96.99  |

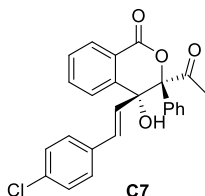

**(3S,4R)-3-acetyl-4-((E)-4-chlorostyryl)-4-hydroxy-3-phenylisochroman-1-one**

The residue was purified by column chromatography on silica gel (PE/CH<sub>2</sub>Cl<sub>2</sub> = 1/1) to afford the desired product **C7**; 0.1 mmol scale reaction; 38.5 mg, white solid, 92% yield, 95% ee; determined by HPLC analysis [Daicel chiralpak IA, *n*-hexane/*i*-PrOH = 90/10, 1.0 mL/min,  $\lambda$  = 254 nm,  $t_1$  = 10.51 min,  $t_2$  = 11.57 min];

<sup>1</sup>H NMR (400 MHz, CDCl<sub>3</sub>)  $\delta$  8.13 – 8.12 (m, 1H), 7.81 – 7.79 (m, 1H), 7.75 – 7.71 (m, 1H), 7.67 – 7.64 (m, 2H), 7.50 (td,  $J$  = 7.6, 1.2 Hz, 1H), 7.45 – 7.40 (m, 3H), 7.17 – 7.14 (m, 2H), 7.02 – 6.98 (m, 2H), 6.06 (d,  $J$  = 16.0 Hz, 1H), 5.95 (dd,  $J$  = 16.0, 1.2 Hz, 1H), 5.25 (d,  $J$  = 1.2 Hz, 1H), 2.13 (s, 3H);

<sup>13</sup>C{<sup>1</sup>H} NMR (101 MHz, CDCl<sub>3</sub>)  $\delta$  211.1, 163.0, 146.1, 135.8, 134.4, 133.6, 131.3, 130.9, 130.3, 129.3, 128.7, 128.6, 128.3, 128.3, 127.8, 126.5, 125.1, 122.0, 90.6, 76.7, 27.4 ppm;

**m.p.** 120.6 – 123.0 °C;

**HRMS** (ESI)  $m/z$  [M+Na]<sup>+</sup> calcd for C<sub>25</sub>H<sub>19</sub><sup>34.9689</sup>ClO<sub>4</sub>Na: 441.0864, found: 441.0866;

**HRMS** (ESI)  $m/z$  [M+Na]<sup>+</sup> calcd for C<sub>25</sub>H<sub>19</sub><sup>36.9659</sup>ClO<sub>4</sub>Na: 443.0835, found: 443.0831;

$[\alpha]_D^{20}$  = +388.0 ( $c$  = 0.61 in CHCl<sub>3</sub>);

**IR** (neat): 3464, 3026, 1738, 1706, 1492, 1452, 1357, 1288, 1248, 1211, 1085, 1042, 970, 755, 727, 579 cm<sup>-1</sup>.

HPLC spectrum of **C7**

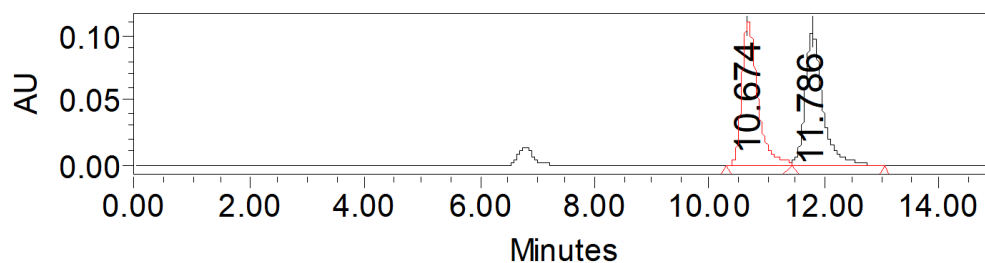

|   | Retention Time | Area    | % Area |
|---|----------------|---------|--------|
| 1 | 10.674         | 2150903 | 49.06  |
| 2 | 11.786         | 2233024 | 50.94  |

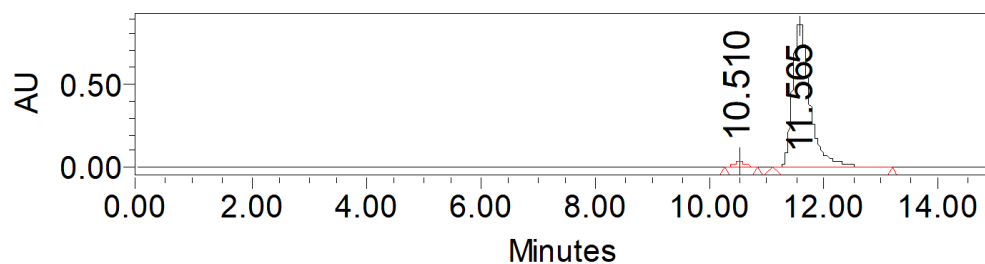

|   | Retention Time | Area     | % Area |
|---|----------------|----------|--------|
| 1 | 10.510         | 495033   | 2.56   |
| 2 | 11.565         | 18846445 | 97.44  |

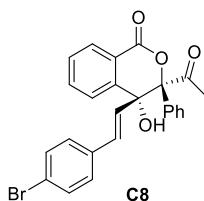

**(3*S*,4*R*)-3-acetyl-4-((*E*)-4-bromostyryl)-4-hydroxy-3-phenylisochroman-1-one**

The residue was purified by column chromatography on silica gel (PE/CH<sub>2</sub>Cl<sub>2</sub> = 1/1) to afford the desired product **C8**; 0.1 mmol scale reaction; 30.1 mg, white solid, 65% yield, 98% ee; determined by HPLC analysis [Daicel chiralpak IA, *n*-hexane/*i*-PrOH = 90/10, 1.0 mL/min,  $\lambda$  = 254 nm,  $t_1$  = 8.54 min,  $t_2$  = 9.79 min];

<sup>1</sup>H NMR (400 MHz, CDCl<sub>3</sub>)  $\delta$  8.12 (dd,  $J$  = 7.6, 1.2 Hz, 1H), 7.80 (dd,  $J$  = 7.6, 1.2 Hz, 1H), 7.73 (td,  $J$  = 7.2, 1.2 Hz, 1H), 7.67 – 7.65 (m, 2H), 7.50 (td,  $J$  = 7.6, 1.2 Hz, 1H), 7.45 – 7.40 (m, 3H), 7.32 – 7.29 (m, 2H), 6.95 – 6.92 (m, 2H), 6.05 (d,  $J$  = 16.0 Hz, 1H), 5.97 (d,  $J$  = 16.0 Hz, 1H), 5.26 (s, 1H), 2.13 (s, 3H);

<sup>13</sup>C{<sup>1</sup>H} NMR (101 MHz, CDCl<sub>3</sub>)  $\delta$  211.0, 163.0, 146.0, 135.8, 134.9, 131.5, 131.2, 130.9, 130.3, 129.3, 128.7, 128.4, 128.3, 128.1, 126.5, 125.1, 121.9, 121.8, 90.5, 76.7, 27.4 ppm;

**m.p.** 110.3 – 112.5 °C;

**HRMS** (ESI)  $m/z$  [M+Na]<sup>+</sup> calcd for C<sub>25</sub>H<sub>19</sub><sup>78,9183</sup>BrO<sub>4</sub>Na: 485.0359, found: 485.0369;

**HRMS** (ESI)  $m/z$  [M+Na]<sup>+</sup> calcd for C<sub>25</sub>H<sub>19</sub><sup>80,9163</sup>BrO<sub>4</sub>Na: 487.0338, found: 487.0348;

$[\alpha]_D^{20}$  = +433.1 ( $c$  = 0.82 in CHCl<sub>3</sub>);

**IR** (neat): 3465, 3066, 2927, 1738, 1706, 1602, 1488, 1452, 1358, 1287, 1247, 1078, 970, 756, 723, 575 cm<sup>-1</sup>.

HPLC spectrum of **C8**

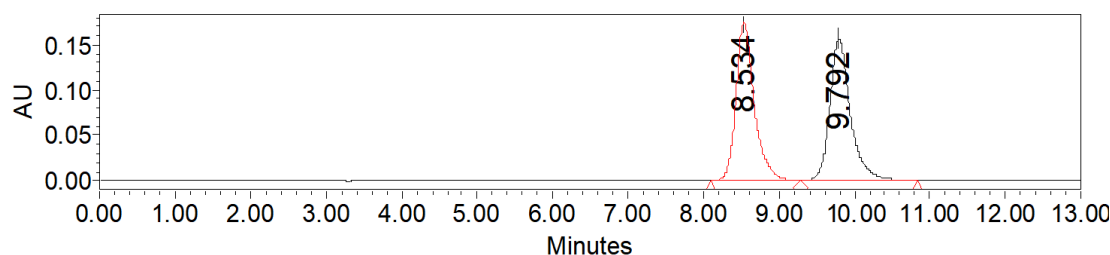

|   | Retention Time | Area    | % Area |
|---|----------------|---------|--------|
| 1 | 8.534          | 2979293 | 49.98  |
| 2 | 9.792          | 2981247 | 50.02  |

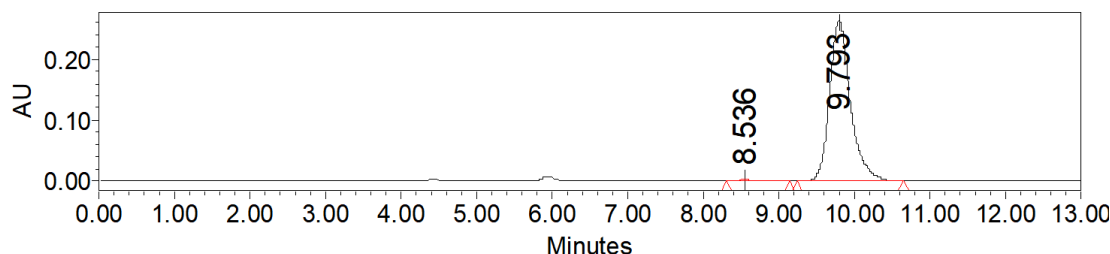

|   | Retention Time | Area    | % Area |
|---|----------------|---------|--------|
| 1 | 8.536          | 53136   | 1.05   |
| 2 | 9.793          | 5018478 | 98.95  |

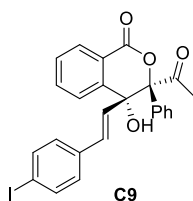

**(3*S*,4*R*)-3-acetyl-4-((*E*)-4-iodostyryl)-4-hydroxy-3-phenylisochroman-1-one**

The residue was purified by column chromatography on silica gel (PE/CH<sub>2</sub>Cl<sub>2</sub> = 1/1) to afford the desired product **C9**; 0.1 mmol scale reaction; 29.6 mg, white solid, 58% yield, 96% ee; determined by HPLC analysis [Daicel chiralpak IA, *n*-hexane/*i*-PrOH = 90/10, 1.0 mL/min,  $\lambda$  = 254 nm,  $t_1$  = 11.93 min,  $t_2$  = 13.06 min];

<sup>1</sup>H NMR (400 MHz, CDCl<sub>3</sub>)  $\delta$  8.12 (dd,  $J$  = 8.0, 1.2 Hz, 1H), 7.81 – 7.78 (m, 1H), 7.73 (td,  $J$  = 7.6, 1.2 Hz, 1H), 7.66 – 7.64 (m, 2H), 7.52 – 7.47 (m, 3H), 7.45 – 7.39 (m, 3H), 6.82 – 6.80 (m, 2H), 6.04 (d,  $J$  = 16.0 Hz, 1H), 5.98 (d,  $J$  = 16.0 Hz, 1H), 5.25 (s, 1H), 2.13 (s, 3H);

<sup>13</sup>C{<sup>1</sup>H} NMR (101 MHz, CDCl<sub>3</sub>)  $\delta$  211.0, 163.0, 146.0, 137.5, 135.8, 135.4, 131.2, 131.0, 130.3, 129.2, 128.7, 128.5, 128.3, 128.3, 126.5, 125.1, 121.9, 93.4, 90.5, 27.4 ppm;

**m.p.** 73.2 – 75.4 °C;

**HRMS** (ESI)  $m/z$  [M+Na]<sup>+</sup> calcd for C<sub>25</sub>H<sub>19</sub>IO<sub>4</sub>Na: 533.0220, found: 533.0229;

$[\alpha]_D^{21}$  = +416.3 ( $c$  = 0.71 in CHCl<sub>3</sub>);

**IR** (neat): 3464, 3064, 2924, 1737, 1705, 1602, 1484, 1452, 1357, 1287, 1247, 1212, 1082, 970, 755, 721, 572  $\text{cm}^{-1}$ .

HPLC spectrum of **C9**

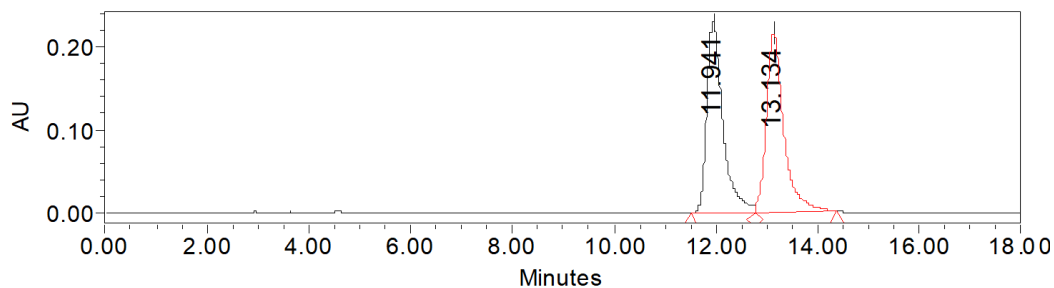

|   | Retention Time | Area    | % Area |
|---|----------------|---------|--------|
| 1 | 11.941         | 5068533 | 49.41  |
| 2 | 13.134         | 5189784 | 50.59  |

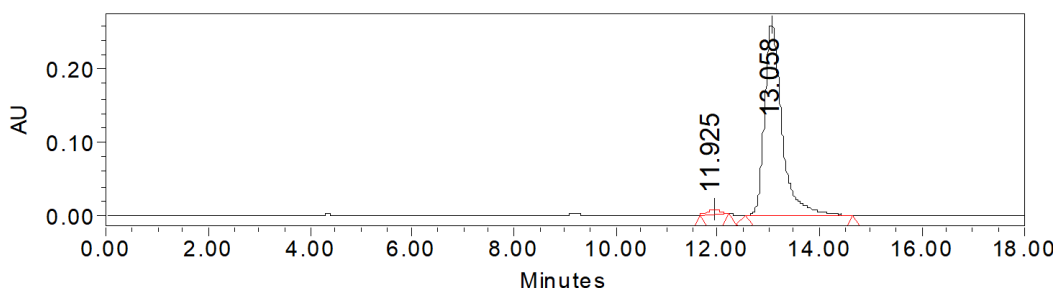

|   | Retention Time | Area    | % Area |
|---|----------------|---------|--------|
| 1 | 11.925         | 125552  | 1.97   |
| 2 | 13.058         | 6245403 | 98.03  |

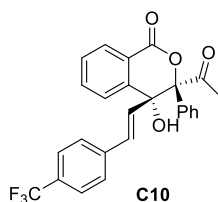

**(3S,4R)-3-acetyl-4-hydroxy-3-phenyl-4-((E)-4-(trifluoromethyl)styryl)isochroman-1-one**

The residue was purified by column chromatography on silica gel (PE/CH<sub>2</sub>Cl<sub>2</sub> = 1/1) to afford the desired product **C10**; 0.1 mmol scale reaction; 29.4 mg, white solid, 65% yield, 95% ee; determined by HPLC analysis [Daicel chiralpak IC, *n*-hexane/*i*-PrOH = 98/2, 1.0 mL/min,  $\lambda$  = 254 nm,  $t_1$  = 6.60 min,  $t_2$  = 7.24 min];

<sup>1</sup>H NMR (400 MHz, CDCl<sub>3</sub>)  $\delta$  8.14 (d,  $J$  = 7.6 Hz, 1H), 7.81 (d,  $J$  = 7.6 Hz, 1H), 7.74 (t,  $J$  = 7.6 Hz, 1H), 7.68 – 7.66 (m, 2H), 7.51 (t,  $J$  = 7.6 Hz, 1H), 7.45 – 7.42 (m, 5H), 7.17 (d,  $J$  = 8.0 Hz, 2H), 6.19 (d,  $J$  = 15.6 Hz, 1H), 6.10 (d,  $J$  = 16.0 Hz, 1H), 5.30 (s, 1H), 2.14 (s, 3H);

<sup>13</sup>C{<sup>1</sup>H} NMR (101 MHz, CDCl<sub>3</sub>)  $\delta$  211.0, 162.9, 145.9, 139.4, 135.9, 131.2, 130.5, 130.4, 130.2, 129.8 (q,  $J_{\text{C-F}}$  = 32.3 Hz), 129.3, 128.8, 128.3, 126.8, 126.4, 125.3 (q,  $J_{\text{C-F}}$  = 272.7 Hz), 125.4 (q,  $J_{\text{C-F}}$  = 4.0 Hz), 125.1, 121.9, 90.5, 76.6, 27.4 ppm;

<sup>19</sup>F{<sup>1</sup>H} NMR (376 MHz, CDCl<sub>3</sub>)  $\delta$  -62.59 ppm;

**m.p.** 76.7 – 80.7 °C;

**HRMS** (ESI)  $m/z$  [M+Na]<sup>+</sup> calcd for C<sub>26</sub>H<sub>19</sub>F<sub>3</sub>O<sub>4</sub>Na: 475.1128, found: 475.1135;

$[\alpha]_D^{21}$  = +452.4 ( $c$  = 1.09 in CHCl<sub>3</sub>);

**IR** (neat): 3465, 3069, 2926, 1740, 1707, 1608, 1452, 1358, 1324, 1288, 1248, 1164, 1122, 1070, 755, 715, 575  $\text{cm}^{-1}$ .

HPLC spectrum of **C10**

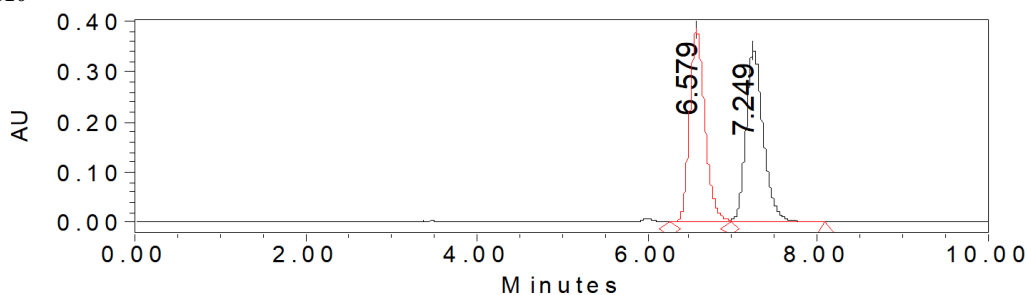

|   | Retention Time | Area    | % Area |
|---|----------------|---------|--------|
| 1 | 6.579          | 4860281 | 49.75  |
| 2 | 7.249          | 4908214 | 50.25  |

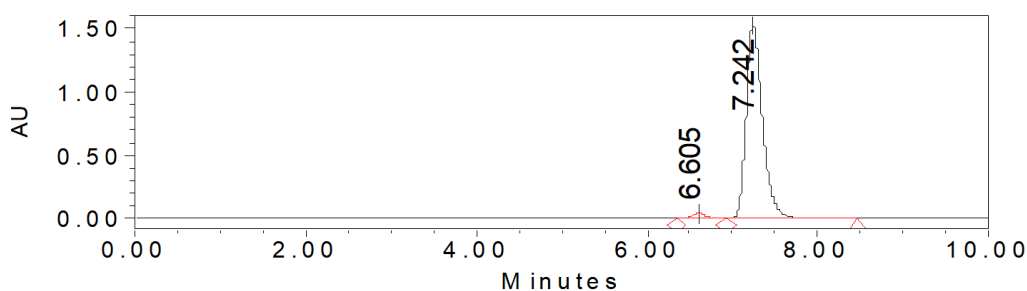

|   | Retention Time | Area     | % Area |
|---|----------------|----------|--------|
| 1 | 6.605          | 504812   | 2.41   |
| 2 | 7.242          | 20413363 | 97.59  |

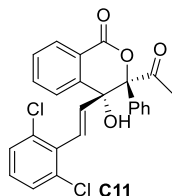

**(3*S*,4*R*)-3-acetyl-4-((*E*)-2,6-dichlorostyryl)-4-hydroxy-3-phenylisochroman-1-one**

The residue was purified by column chromatography on silica gel (PE/CH<sub>2</sub>Cl<sub>2</sub> = 1/1) to afford the desired product **C11**; 0.1 mmol scale reaction; 33.5 mg, white solid, 74% yield, 98% ee; determined by HPLC analysis [Daicel chiralpak IA, *n*-hexane/*i*-PrOH = 90/10, 1.0 mL/min,  $\lambda$  = 254 nm,  $t_1$  = 6.85 min,  $t_2$  = 8.48 min];

<sup>1</sup>H NMR (400 MHz, CDCl<sub>3</sub>)  $\delta$  8.11 (dd,  $J$  = 8.0, 1.2 Hz, 1H), 7.88 (d,  $J$  = 8.0 Hz, 1H), 7.79 – 7.73 (m, 3H), 7.48 (td,  $J$  = 7.6, 1.2 Hz, 1H), 7.45 – 7.40 (m, 3H), 7.14 (d,  $J$  = 8.0 Hz, 2H), 6.97 (d,  $J$  = 8.0 Hz, 1H), 6.26 (d,  $J$  = 16.0 Hz, 1H), 6.05 (dd,  $J$  = 16.0, 1.2 Hz, 1H), 5.34 (d,  $J$  = 1.6 Hz, 1H), 2.13 (s, 3H);

<sup>13</sup>C{<sup>1</sup>H} NMR (101 MHz, CDCl<sub>3</sub>)  $\delta$  211.0, 162.8, 146.0, 135.8, 135.4, 134.2, 133.6, 131.3, 130.2, 129.1, 128.7, 128.4, 128.3, 128.0, 126.7, 126.2, 125.2, 121.9, 90.1, 77.1, 27.2 ppm;

**m.p.** 148.4 – 151.7 °C;

**HRMS** (ESI)  $m/z$  [M+Na]<sup>+</sup> calcd for C<sub>25</sub>H<sub>18</sub><sup>34.9689</sup>Cl<sub>2</sub>O<sub>4</sub>Na: 475.0474, found: 475.0485;

**HRMS** (ESI)  $m/z$  [M+Na]<sup>+</sup> calcd for C<sub>25</sub>H<sub>18</sub><sup>36.9659</sup>Cl<sub>2</sub>O<sub>4</sub>Na: 477.0445, found: 477.0455;

$[\alpha]_D^{20}$  = +393.9 ( $c$  = 0.93 in CHCl<sub>3</sub>);

**IR** (neat): 3462, 3021, 2922, 1738, 1705, 1602, 1495, 1428, 1357, 1286, 1247, 1209, 1082, 1042, 967, 755, 729, 705, 573 cm<sup>-1</sup>.

HPLC spectrum of **C11**

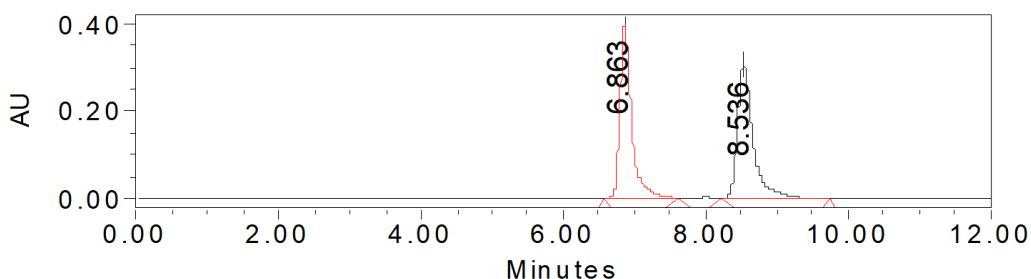

|   | Retention Time | Area    | % Area |
|---|----------------|---------|--------|
| 1 | 6.863          | 4668688 | 49.88  |
| 2 | 8.536          | 4690519 | 50.12  |

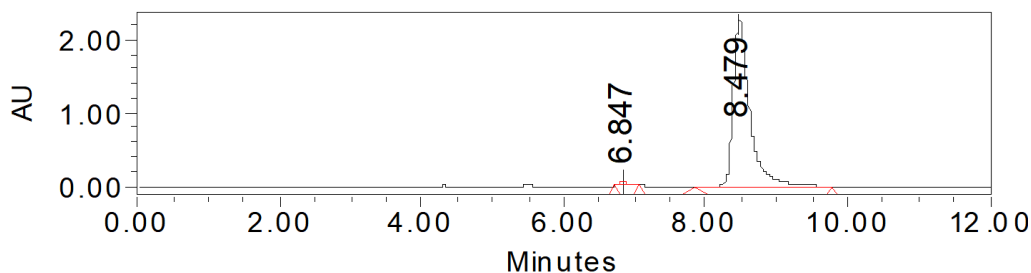

|   | Retention Time | Area     | % Area |
|---|----------------|----------|--------|
| 1 | 6.847          | 380137   | 1.04   |
| 2 | 8.479          | 36058456 | 98.96  |

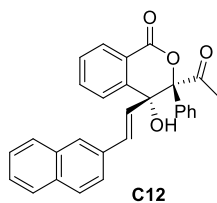

**(3S,4R)-3-acetyl-4-((E)-2-(naphthalen-2-yl)vinyl)-3-phenylisochroman-1-one**

The residue was purified by column chromatography on silica gel (PE/CH<sub>2</sub>Cl<sub>2</sub> = 1/1) to afford the desired product **C12**; 0.1 mmol scale reaction; 26.5 mg, white solid, 61% yield, 95% ee; determined by HPLC analysis [Daicel chiralpak IA, *n*-hexane/*i*-PrOH = 90/10, 1.0 mL/min,  $\lambda$  = 254 nm,  $t_1$  = 12.16 min,  $t_2$  = 14.14 min];

<sup>1</sup>H NMR (400 MHz, CDCl<sub>3</sub>)  $\delta$  8.18 – 8.16 (m, 1H), 7.86 (dd,  $J$  = 8.0, 1.2 Hz, 1H), 7.77 – 7.65 (m, 6H), 7.51 (td,  $J$  = 7.6, 1.2 Hz, 1H), 7.48 – 7.39 (m, 6H), 7.30 – 7.27 (m, 1H), 6.29 (d,  $J$  = 15.6 Hz, 1H), 6.13 (dd,  $J$  = 16.0, 1.2 Hz, 1H), 5.31 (d,  $J$  = 0.8 Hz, 1H), 2.16 (s, 3H);

<sup>13</sup>C{<sup>1</sup>H} NMR (101 MHz, CDCl<sub>3</sub>)  $\delta$  211.1, 163.1, 146.3, 135.8, 133.4, 133.3, 133.0, 132.2, 131.4, 130.3, 129.2, 128.6, 128.3, 128.0, 128.0, 127.9, 127.5, 127.0, 126.6, 126.2, 126.0, 125.2, 123.4, 122.0, 90.7, 76.9, 27.4 ppm;

**m.p.** 128.1 – 130.8 °C;

**HRMS** (ESI)  $m/z$  [M+Na]<sup>+</sup> calcd for C<sub>29</sub>H<sub>22</sub>O<sub>4</sub>Na: 457.1410, found: 457.1403;

**[ $\alpha$ ]<sub>D</sub><sup>22</sup>** = +532.3 ( $c$  = 0.83 in CHCl<sub>3</sub>);

**IR** (neat): 3464, 3020, 1738, 1706, 1602, 1452, 1356, 1287, 1248, 1082, 751, 710, 583 cm<sup>-1</sup>.

HPLC spectrum of **C12**

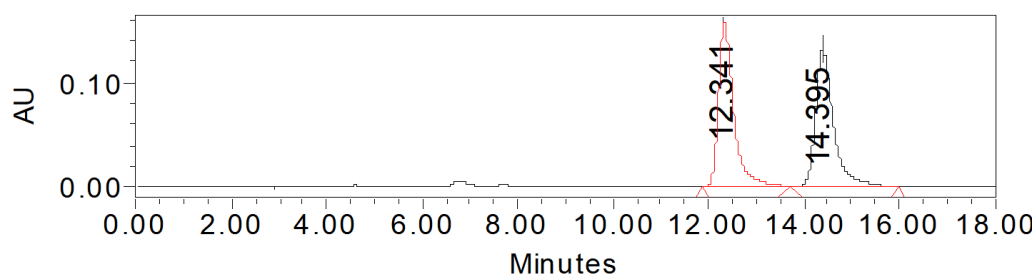

|   | Retention Time | Area    | % Area |
|---|----------------|---------|--------|
| 1 | 12.341         | 3591537 | 50.09  |
| 2 | 14.395         | 3578357 | 49.91  |

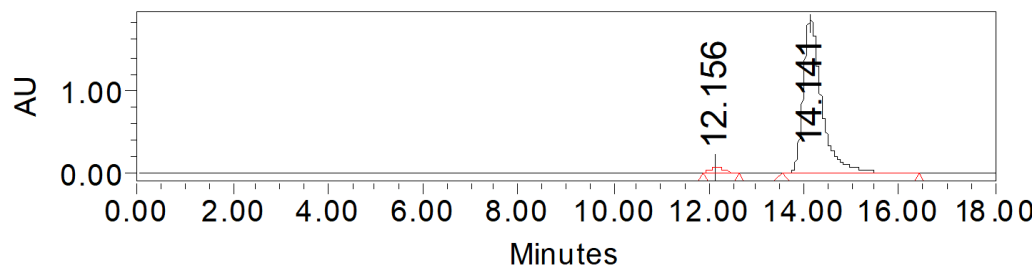

|   | Retention Time | Area     | % Area |
|---|----------------|----------|--------|
| 1 | 12.156         | 1222421  | 2.36   |
| 2 | 14.141         | 50546689 | 97.64  |

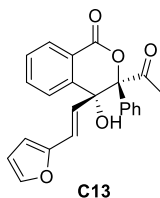

**(3S,4R)-3-acetyl-4-((E)-2-(furan-2-yl)vinyl)-4-hydroxy-3-phenylisochroman-1-one**

The residue was purified by column chromatography on silica gel (PE/CH<sub>2</sub>Cl<sub>2</sub> = 1/1) to afford the desired product **C13**; 0.1 mmol scale reaction; 26.2 mg, white solid, 70% yield, 94% ee; determined by HPLC analysis [Daicel chiralpak IA, *n*-hexane/*i*-PrOH = 90/10, 1.0 mL/min,  $\lambda$  = 254 nm,  $t_1$  = 7.26 min,  $t_2$  = 9.78 min];

<sup>1</sup>H NMR (400 MHz, CDCl<sub>3</sub>)  $\delta$  8.10 (dd,  $J$  = 7.6, 1.2 Hz, 1H), 7.77 (dd,  $J$  = 7.6, 1.2 Hz, 1H), 7.73 – 7.65 (m, 3H), 7.47 (td,  $J$  = 7.6, 1.2 Hz, 1H), 7.44 – 7.38 (m, 3H), 7.21 (d,  $J$  = 2.0 Hz, 1H), 6.24 (dd,  $J$  = 3.2, 1.6 Hz, 1H), 6.05 – 6.03 (m, 1H), 6.00 – 5.99 (m, 2H), 5.22 (d,  $J$  = 0.8 Hz, 1H), 2.12 (s, 3H);

<sup>13</sup>C{<sup>1</sup>H} NMR (101 MHz, CDCl<sub>3</sub>)  $\delta$  211.1, 163.0, 151.7, 146.4, 142.2, 135.8, 131.2, 130.3, 129.1, 128.5, 128.3, 126.6, 125.8, 124.9, 121.8, 119.9, 111.2, 109.3, 90.6, 76.6, 27.4 ppm;

**m.p.** 75.9 – 78.2 °C;

**HRMS** (ESI)  $m/z$  [M+Na]<sup>+</sup> calcd for C<sub>23</sub>H<sub>18</sub>O<sub>5</sub>Na: 397.1046, found: 397.1037;

$[\alpha]_D^{21} = +496.8$  ( $c = 0.34$  in  $\text{CHCl}_3$ );

**IR** (neat): 3464, 3025, 2924, 2338, 1739, 1706, 1602, 1491, 1452, 1357, 1287, 1248, 1081, 963, 750, 708, 576  $\text{cm}^{-1}$ .

HPLC spectrum of **C13**

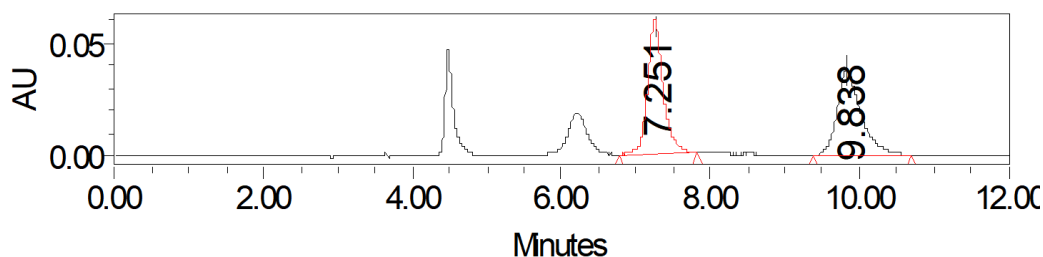

|   | Retention Time | Area   | % Area |
|---|----------------|--------|--------|
| 1 | 7.251          | 852548 | 50.47  |
| 2 | 9.838          | 836522 | 49.53  |

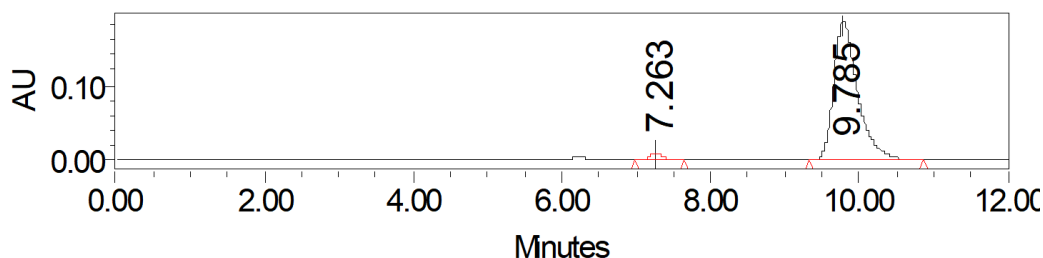

|   | Retention Time | Area    | % Area |
|---|----------------|---------|--------|
| 1 | 7.263          | 130677  | 3.05   |
| 2 | 9.785          | 4156254 | 96.95  |

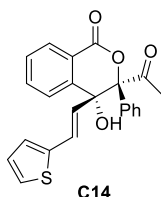

**C14**

**(3S,4R)-3-acetyl-4-hydroxy-3-phenyl-4-((E)-2-(thiophen-2-yl)vinyl)isochroman-1-one**

The residue was purified by column chromatography on silica gel ( $\text{PE}/\text{CH}_2\text{Cl}_2 = 1/1$ ) to afford the desired product **C14**; 0.1 mmol scale reaction; 27.7 mg, white solid, 71% yield, 94% ee; determined by HPLC analysis [Daicel chiralpak IA, *n*-hexane/*i*-PrOH = 90/10, 1.0 mL/min,  $\lambda = 254$  nm,  $t_1 = 7.50$  min,  $t_2 = 11.29$  min];

**$^1\text{H}$  NMR** (400 MHz,  $\text{CDCl}_3$ )  $\delta$  8.13 – 8.11 (m, 1H), 7.80 (dd,  $J = 7.6, 1.2$  Hz, 1H), 7.73 (td,  $J = 7.2, 1.2$  Hz, 1H), 7.67 – 7.64 (m, 2H), 7.49 (td,  $J = 7.6, 1.2$  Hz, 1H), 7.46 – 7.38 (m, 3H), 7.08 – 7.06 (m, 1H), 6.84 (dd,  $J = 4.8, 3.6$  Hz, 1H), 6.74 – 6.72 (m, 1H), 6.20 (d,  $J = 16.0$  Hz, 1H), 5.82 (dd,  $J = 15.6, 1.2$  Hz, 1H), 5.23 (d,  $J = 1.2$  Hz, 1H), 2.13 (s, 3H);

**$^{13}\text{C}\{^1\text{H}\}$  NMR** (101 MHz,  $\text{CDCl}_3$ )  $\delta$  211.1, 163.0, 146.0, 140.9, 135.8, 131.2, 130.3, 129.2, 128.6, 128.3, 127.2, 127.0, 126.7, 126.5, 125.2, 125.1, 124.9, 121.9, 90.6, 76.6, 27.5 ppm;

**m.p.** 70.7 – 73.3  $^\circ\text{C}$ ;

**HRMS** (ESI)  $m/z$   $[\text{M}+\text{Na}]^+$  calcd for  $\text{C}_{23}\text{H}_{18}\text{O}_4\text{SNa}$ : 413.0818, found: 413.0825;

$[\alpha]_D^{21} = +481.3$  ( $c = 0.26$  in  $\text{CHCl}_3$ );

**IR** (neat): 3463, 3069, 2924, 2361, 1739, 1706, 1602, 1452, 1356, 1287, 1248, 1210, 1082, 959, 753, 700, 564  $\text{cm}^{-1}$ .

HPLC spectrum of **C14**

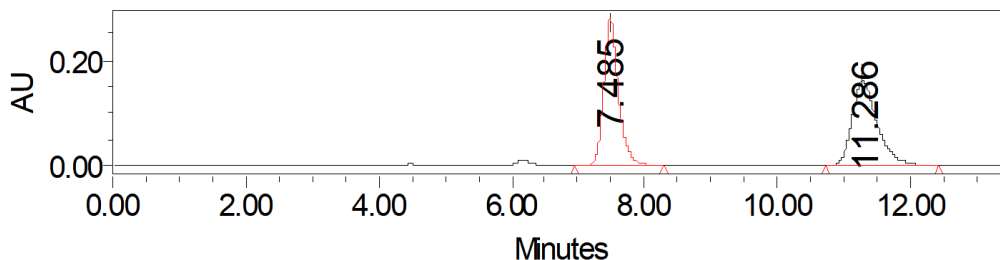

|   | Retention Time | Area    | % Area |
|---|----------------|---------|--------|
| 1 | 7.485          | 4364926 | 50.15  |

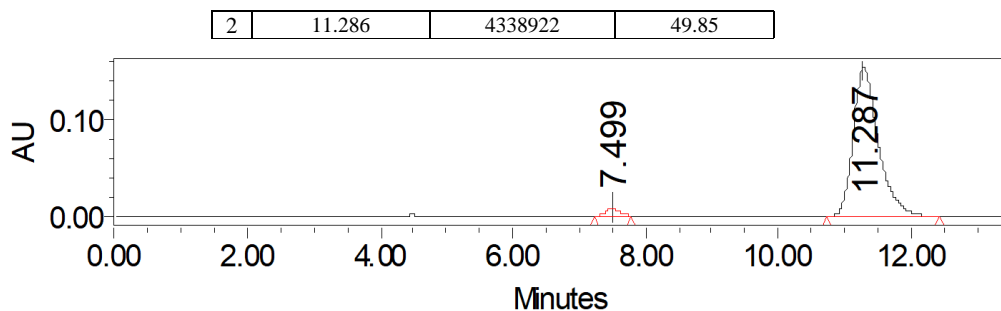

|   | Retention Time | Area    | % Area |
|---|----------------|---------|--------|
| 1 | 7.499          | 124095  | 2.94   |
| 2 | 11.287         | 4102791 | 97.06  |

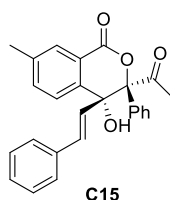

**(3S,4R)-3-acetyl-4-hydroxy-7-methyl-3-phenyl-4-((E)-styryl)isochroman-1-one**

The residue was purified by column chromatography on silica gel (PE/CH<sub>2</sub>Cl<sub>2</sub> = 1/1) to afford the desired product **C15**; 0.1 mmol scale reaction; 30.2 mg, white solid, 76% yield, 95% ee; determined by HPLC analysis [Daicel chiralpak IC, *n*-hexane/*i*-PrOH = 90/10, 1.0 mL/min,  $\lambda$  = 254 nm,  $t_1$  = 5.56 min,  $t_2$  = 6.61 min];

<sup>1</sup>H NMR (400 MHz, CDCl<sub>3</sub>)  $\delta$  8.01 (d,  $J$  = 8.0 Hz, 1H), 7.69 – 7.66 (m, 2H), 7.60 (s, 1H), 7.45 – 7.38 (m, 3H), 7.29 – 7.27 (m, 1H), 7.22 – 7.14 (m, 3H), 7.11 – 7.08 (m, 2H), 6.11 (d,  $J$  = 16.0 Hz, 1H), 5.98 (d,  $J$  = 16.0 Hz, 1H), 5.22 (s, 1H), 2.47 (s, 3H), 2.13 (s, 3H);

<sup>13</sup>C{<sup>1</sup>H} NMR (101 MHz, CDCl<sub>3</sub>)  $\delta$  211.4, 163.2, 147.2, 146.2, 136.0, 131.9, 131.4, 130.4, 129.5, 129.1, 128.4, 128.3, 127.9, 127.8, 126.6, 126.6, 125.5, 119.3, 90.6, 76.8, 27.5, 22.2 ppm;

**m.p.** 128.7 – 131.6 °C;

**HRMS** (ESI)  $m/z$  [M+Na]<sup>+</sup> calcd for C<sub>26</sub>H<sub>22</sub>O<sub>4</sub>Na: 421.1410, found: 421.1408;

**[ $\alpha$ ]<sub>D</sub><sup>21</sup>** = +407.1 ( $c$  = 0.96 in CHCl<sub>3</sub>);

**IR** (neat): 3461, 3024, 2922, 2361, 1737, 1704, 1607, 1495, 1448, 1357, 1283, 1256, 1214, 1071, 770, 748, 693, 591, 550 cm<sup>-1</sup>.

HPLC spectrum of **C15**

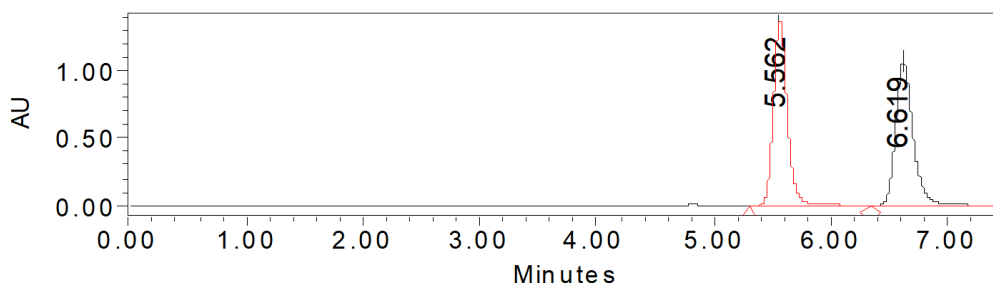

|   | Retention Time | Area     | % Area |
|---|----------------|----------|--------|
| 1 | 5.562          | 11101522 | 49.86  |
| 2 | 6.619          | 11162483 | 50.14  |

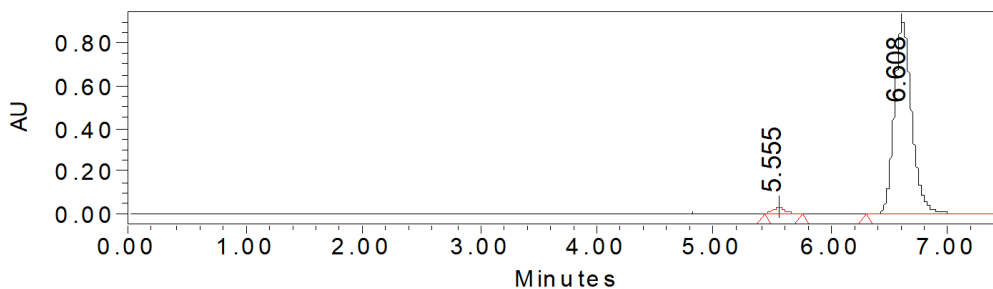

|   | Retention Time | Area    | % Area |
|---|----------------|---------|--------|
| 1 | 5.555          | 238836  | 2.50   |
| 2 | 6.608          | 9302608 | 97.50  |



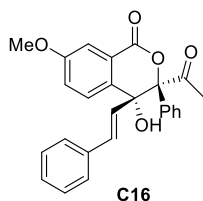

**(3S,4R)-3-acetyl-4-hydroxy-7-methoxy-3-phenyl-4-((E)-styryl)isochroman-1-one**

The residue was purified by column chromatography on silica gel (PE/CH<sub>2</sub>Cl<sub>2</sub> = 1/1) to afford the desired product **C16**; 0.1 mmol scale reaction; 31.5 mg, white solid, 76% yield, 92% ee; determined by HPLC analysis [Daicel chiralpak IA, *n*-hexane/*i*-PrOH = 90/10, 1.0 mL/min,  $\lambda$  = 254 nm,  $t_1$  = 12.05 min,  $t_2$  = 13.84 min];

<sup>1</sup>H NMR (400 MHz, CDCl<sub>3</sub>)  $\delta$  8.07 (dd,  $J$  = 8.8, 1.2 Hz, 1H), 7.69 – 7.66 (m, 2H), 7.45 – 7.38 (m, 3H), 7.26 – 7.25 (m, 1H), 7.22 – 7.14 (m, 3H), 7.11 – 7.09 (m, 2H), 6.98 – 6.95 (m, 1H), 6.13 (d,  $J$  = 16.0 Hz, 1H), 5.98 (d,  $J$  = 16.0 Hz, 1H), 5.29 (s, 1H), 3.91 (s, 3H), 2.14 (s, 3H);

<sup>13</sup>C{<sup>1</sup>H} NMR (101 MHz, CDCl<sub>3</sub>)  $\delta$  211.6, 165.6, 162.9, 149.1, 135.9, 132.8, 132.0, 131.4, 129.1, 128.4, 128.2, 127.9, 127.5, 126.6, 115.3, 114.3, 109.1, 90.5, 76.9, 55.8, 27.4 ppm;

**m.p.** 87.5 – 91.6 °C;

**HRMS** (ESI)  $m/z$  [M+Na]<sup>+</sup> calcd for C<sub>26</sub>H<sub>22</sub>O<sub>5</sub>Na: 437.1360, found: 437.1360;

$[\alpha]_D^{21}$  = +312.4 ( $c$  = 0.44 in CHCl<sub>3</sub>);

**IR** (neat): 3462, 3061, 2941, 2361, 1732, 1707, 1603, 1492, 1448, 1264, 1214, 1077, 771, 751, 695, 590, 552 cm<sup>-1</sup>.

HPLC spectrum of **C16**

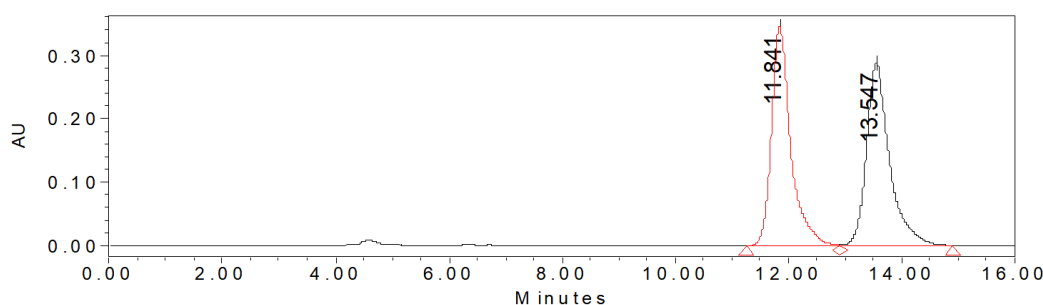

|   | Retention Time | Area    | % Area |
|---|----------------|---------|--------|
| 1 | 11.841         | 8116330 | 49.92  |
| 2 | 13.547         | 8142419 | 50.08  |

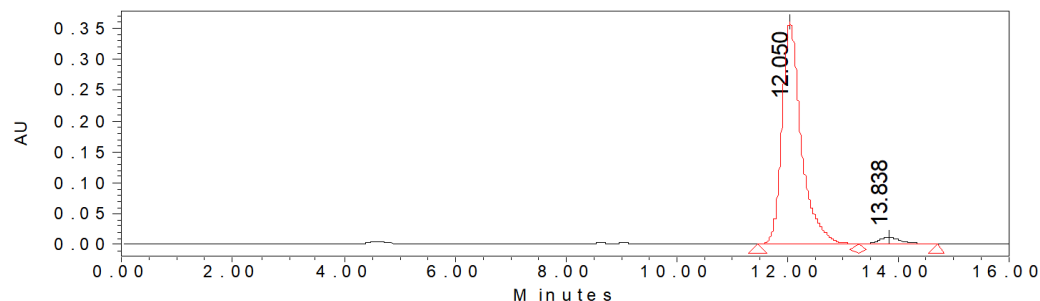

|   | Retention Time | Area    | % Area |
|---|----------------|---------|--------|
| 1 | 12.050         | 8767417 | 96.30  |
| 2 | 13.838         | 337137  | 3.70   |

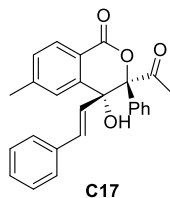

**(3S,4R)-3-acetyl-4-hydroxy-6-methyl-3-phenyl-4-((E)-styryl)isochroman-1-one**

The residue was purified by column chromatography on silica gel (PE/CH<sub>2</sub>Cl<sub>2</sub> = 1/1) to afford the desired product **C17**; 0.1 mmol scale reaction; 28.3 mg, white solid, 71% yield, 91% ee; determined by HPLC analysis [Daicel chiralpak IA, *n*-hexane/*i*-PrOH = 90/10, 1.0 mL/min,  $\lambda$  = 254 nm,  $t_1$  = 7.31 min,  $t_2$  = 8.91 min];

<sup>1</sup>H NMR (400 MHz, CDCl<sub>3</sub>)  $\delta$  7.93 – 7.92 (m, 1H), 7.70 – 7.67 (m, 3H), 7.55 – 7.52 (m, 1H), 7.46 – 7.38 (m, 3H), 7.21 – 7.13 (m, 3H), 7.09 – 7.06 (m, 2H), 6.07 (d,  $J$  = 16.0 Hz, 1H), 5.96 (dd,  $J$  = 16.0, 1.2 Hz, 1H), 5.21 (d,  $J$  = 1.2 Hz, 1H), 2.44 (s, 3H), 2.13 (s, 3H);

<sup>13</sup>C{<sup>1</sup>H} NMR (101 MHz, CDCl<sub>3</sub>)  $\delta$  211.2, 163.6, 143.3, 138.7, 136.7, 136.0, 132.0, 131.4, 130.4, 129.1, 128.4, 128.3, 127.9, 127.9, 126.6, 126.6, 125.1, 121.8, 90.6, 76.8, 27.5, 21.0 ppm;

**m.p.** 66.6 – 69.8 °C;

**HRMS** (ESI)  $m/z$  [M+Na]<sup>+</sup> calcd for C<sub>26</sub>H<sub>22</sub>O<sub>4</sub>Na: 421.1410, found: 421.1407;

$[\alpha]_D^{21}$  = +472.0 ( $c$  = 0.49 in CHCl<sub>3</sub>);

**IR** (neat): 3464, 3060, 3026, 2924, 1736, 1705, 1613, 1494, 1357, 1283, 1251, 1210, 1181, 1079, 1044, 969, 749, 695, 593, 561  $\text{cm}^{-1}$ .

HPLC spectrum of **C17**

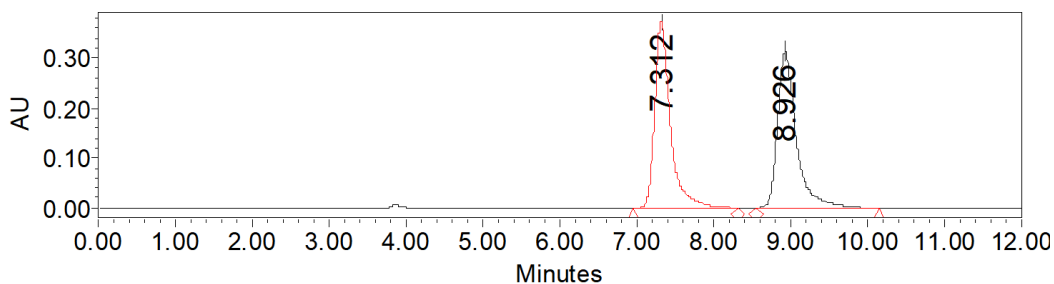

|   | Retention Time | Area    | % Area |
|---|----------------|---------|--------|
| 1 | 7.312          | 5329922 | 50.02  |
| 2 | 8.926          | 5324603 | 49.98  |

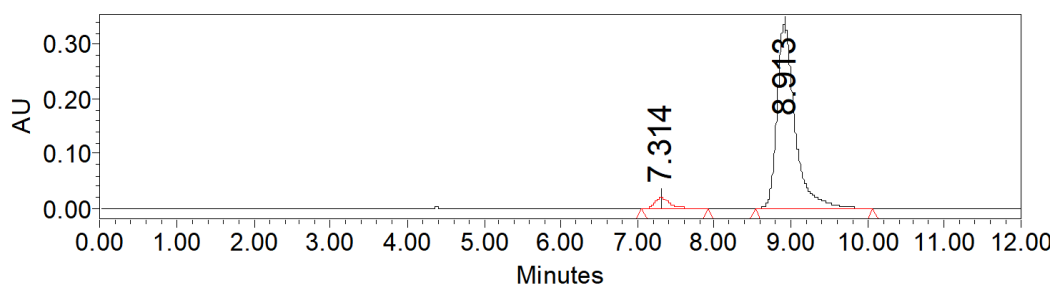

|   | Retention Time | Area    | % Area |
|---|----------------|---------|--------|
| 1 | 7.314          | 254877  | 4.42   |
| 2 | 8.913          | 5507908 | 95.58  |

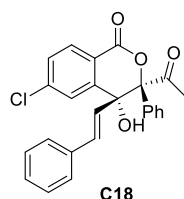

**(3*S*,4*R*)-3-acetyl-6-chloro-4-hydroxy-3-phenyl-4-((*E*)-styryl)isochroman-1-one**

The residue was purified by column chromatography on silica gel (PE/ $\text{CH}_2\text{Cl}_2$  = 1/1) to afford the desired product **C18**; 0.1 mmol scale reaction; 30.1 mg, white solid, 72% yield, 95% ee; determined by HPLC analysis [Daicel chiralpak IA, *n*-hexane/*i*-PrOH = 90/10, 1.0 mL/min,  $\lambda$  = 254 nm,  $t_1$  = 6.27 min,  $t_2$  = 8.39 min];

**$^1\text{H}$  NMR** (400 MHz,  $\text{CDCl}_3$ )  $\delta$  8.09 (d,  $J$  = 2.0 Hz, 1H), 7.77 (d,  $J$  = 8.4 Hz, 1H), 7.70 – 7.63 (m, 3H), 7.45 – 7.41 (m, 3H), 7.22 – 7.15 (m, 3H), 7.09 – 7.06 (m, 2H), 6.09 (d,  $J$  = 16.0 Hz, 1H), 5.93 (dd,  $J$  = 16.0, 0.8 Hz, 1H), 5.26 (d,  $J$  = 0.8 Hz, 1H), 2.14 (s, 3H);

**$^{13}\text{C}\{^1\text{H}\}$  NMR** (101 MHz,  $\text{CDCl}_3$ )  $\delta$  210.9, 161.9, 144.7, 135.8, 135.7, 134.9, 132.5, 131.0, 129.8, 129.4, 128.4, 128.4, 128.1, 127.3, 127.1, 126.7, 126.5, 123.5, 90.7, 76.7, 27.4 ppm;

**m.p.** 58.7 – 63.4  $^\circ\text{C}$ ;

**HRMS** (ESI)  $m/z$  [ $\text{M}+\text{Na}$ ] $^+$  calcd for  $\text{C}_{25}\text{H}_{19}^{34.9689}\text{ClO}_4\text{Na}$ : 441.0864, found: 441.0858;

**HRMS** (ESI)  $m/z$  [ $\text{M}+\text{Na}$ ] $^+$  calcd for  $\text{C}_{25}\text{H}_{19}^{36.9659}\text{ClO}_4\text{Na}$ : 443.0835, found: 443.0829;

**$[\alpha]_D^{22}$**  = +410.1 ( $c$  = 0.50 in  $\text{CHCl}_3$ );

**IR** (neat): 3464, 3063, 2925, 1742, 1707, 1598, 1449, 1358, 1299, 1243, 1078, 969, 752, 695, 593, 559  $\text{cm}^{-1}$ .

HPLC spectrum of **C18**

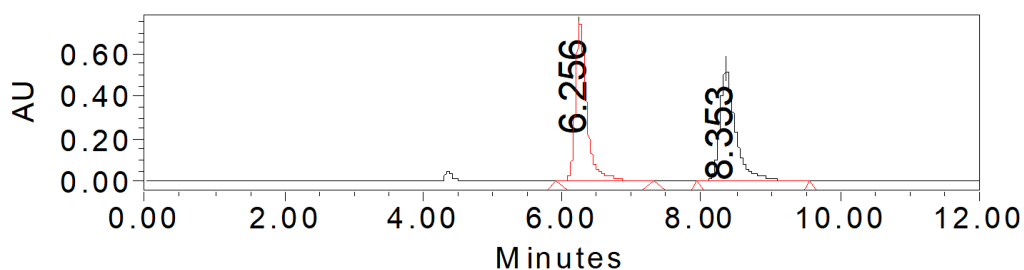

|   | Retention Time | Area    | % Area |
|---|----------------|---------|--------|
| 1 | 6.256          | 8582517 | 50.01  |
| 2 | 8.353          | 8580724 | 49.99  |

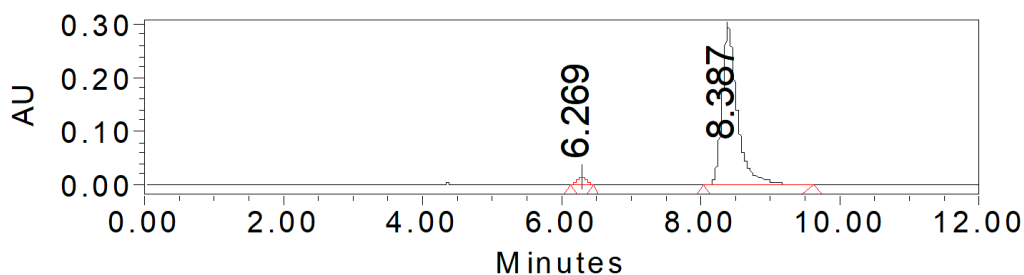

|   | Retention Time | Area    | % Area |
|---|----------------|---------|--------|
| 1 | 6.269          | 121592  | 2.57   |
| 2 | 8.387          | 4610064 | 97.43  |

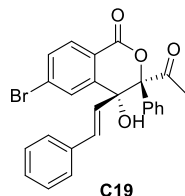

**(3S,4R)-3-acetyl-6-bromo-4-hydroxy-3-phenyl-4-((E)-styryl)isochroman-1-one**

The residue was purified by column chromatography on silica gel (PE/CH<sub>2</sub>Cl<sub>2</sub> = 1/1) to afford the desired product **C19**; 0.1 mmol scale reaction; 35.7 mg, white solid, 77% yield, 95% ee; determined by HPLC analysis [Daicel chiralpak IA, *n*-hexane/*i*-PrOH = 90/10, 1.0 mL/min,  $\lambda$  = 254 nm,  $t_1$  = 6.94 min,  $t_2$  = 9.82 min];

<sup>1</sup>H NMR (400 MHz, CDCl<sub>3</sub>)  $\delta$  8.25 – 8.24 (m, 1H), 7.85 – 7.83 (m, 1H), 7.70 (d,  $J$  = 8.4 Hz, 1H), 7.66 – 7.64 (m, 2H), 7.46 – 7.39 (m, 3H), 7.23 – 7.15 (m, 3H), 7.09 – 7.07 (m, 2H), 6.09 (d,  $J$  = 16.0 Hz, 1H), 5.93 (d,  $J$  = 16.0 Hz, 1H), 5.26 (s, 1H), 2.14 (s, 3H);

<sup>13</sup>C{<sup>1</sup>H} NMR (101 MHz, CDCl<sub>3</sub>)  $\delta$  210.9, 161.8, 145.2, 138.7, 135.7, 132.8, 132.5, 131.0, 129.4, 128.4, 128.4, 128.1, 127.2, 127.1, 126.7, 126.5, 123.6, 122.6, 90.6, 76.7, 27.5 ppm;

**m.p.** 70.9 – 75.0 °C;

**HRMS** (ESI)  $m/z$  [M+Na]<sup>+</sup> calcd for C<sub>25</sub>H<sub>19</sub><sup>78,9183</sup>BrO<sub>4</sub>Na: 485.0359, found: 485.0359;

**HRMS** (ESI)  $m/z$  [M+Na]<sup>+</sup> calcd for C<sub>25</sub>H<sub>19</sub><sup>80,9163</sup>BrO<sub>4</sub>Na: 487.0339, found: 487.0338;

$[\alpha]_D^{21}$  = +422.9 ( $c$  = 0.40 in CHCl<sub>3</sub>);

**IR** (neat): 3463, 3063, 3027, 2361, 2337, 1742, 1706, 1594, 1450, 1358, 1241, 1215, 1083, 969, 769, 754, 695, 593, 557 cm<sup>-1</sup>.

HPLC spectrum of **C19**

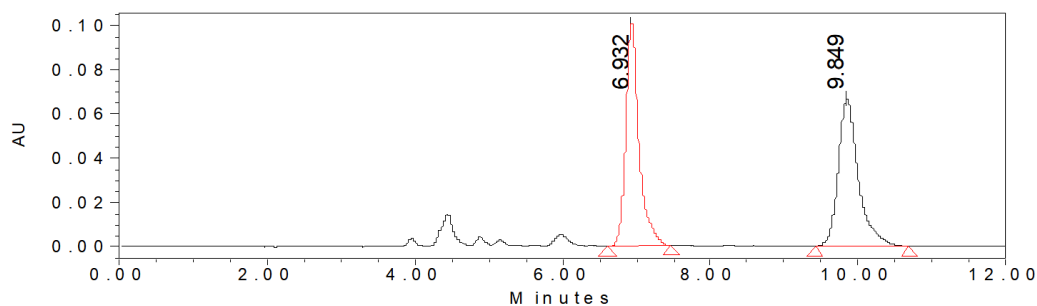

|   | Retention Time | Area    | % Area |
|---|----------------|---------|--------|
| 1 | 6.932          | 1252127 | 49.93  |
| 2 | 9.849          | 1255614 | 50.07  |

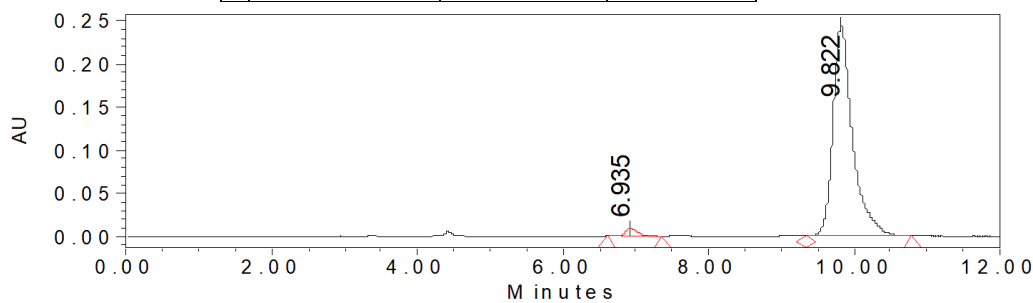

|   | Retention Time | Area    | % Area |
|---|----------------|---------|--------|
| 1 | 6.935          | 115818  | 2.46   |
| 2 | 9.822          | 4590776 | 97.54  |

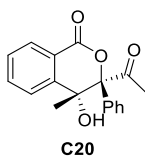

**(3S,4R)-3-acetyl-4-hydroxy-4-methyl-3-phenylisochroman-1-one**

The residue was purified by column chromatography on silica gel (PE/CH<sub>2</sub>Cl<sub>2</sub> = 1/1.5) to afford the desired product **C20**; 0.1 mmol scale reaction; 26.7 mg, white solid, 90% yield, 94% ee; determined by HPLC analysis [Daicel chiralpak IA, *n*-hexane/*i*-PrOH = 90/10, 1.0 mL/min,  $\lambda$  = 230 nm,  $t_1$  = 5.61 min,  $t_2$  = 6.48 min];

<sup>1</sup>H NMR (400 MHz, CDCl<sub>3</sub>)  $\delta$  8.06 (d,  $J$  = 8.0 Hz, 1H), 7.82 (d,  $J$  = 7.6 Hz, 1H), 7.76 – 7.68 (m, 3H), 7.50 – 7.42 (m, 4H), 4.86 (s, 1H), 2.08 (s, 3H), 1.16 (s, 3H);

<sup>13</sup>C{<sup>1</sup>H} NMR (101 MHz, CDCl<sub>3</sub>)  $\delta$  211.2, 163.0, 149.2, 135.7, 131.6, 130.3, 129.2, 128.5, 128.2, 126.5, 124.1, 121.3, 90.7, 74.5, 27.3, 25.8 ppm;

**m.p.** 100.2 – 102.8 °C;

**HRMS** (ESI)  $m/z$  [M+Na]<sup>+</sup> calcd for C<sub>18</sub>H<sub>16</sub>O<sub>4</sub>Na: 319.0941, found: 319.0940;

$[\alpha]_D^{21}$  = +421.7 ( $c$  = 0.95 in CHCl<sub>3</sub>);

**IR** (neat): 3476, 3067, 2933, 1738, 1706, 1603, 1452, 1357, 1290, 1257, 1212, 1099, 1052, 755, 705, 602, 579, 559 cm<sup>-1</sup>.

HPLC spectrum of **C20**

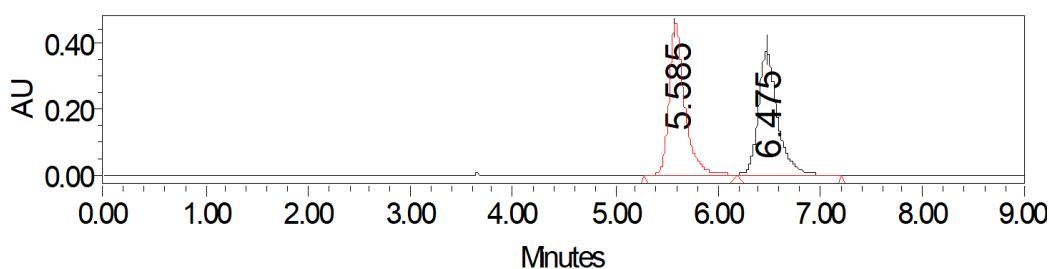

|   | Retention Time | Area    | % Area |
|---|----------------|---------|--------|
| 1 | 5.585          | 4893032 | 50.02  |
| 2 | 6.475          | 4889725 | 49.98  |

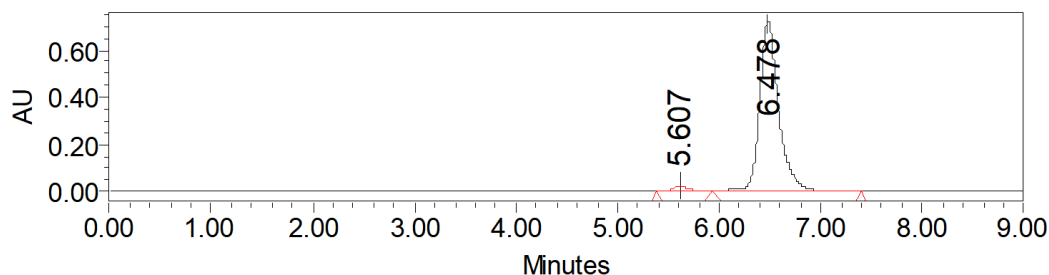

|   | Retention Time | Area    | % Area |
|---|----------------|---------|--------|
| 1 | 5.607          | 281685  | 2.90   |
| 2 | 6.478          | 9417063 | 97.10  |

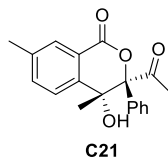

**(3S,4R)-3-acetyl-4-hydroxy-4,7-dimethyl-3-phenylisochroman-1-one**

The residue was purified by column chromatography on silica gel (PE/CH<sub>2</sub>Cl<sub>2</sub> = 1/1.5) to afford the desired product **C21**; 0.1 mmol scale reaction; 14.9 mg, white solid, 48% yield, 91% ee; determined by HPLC analysis [Daicel chiralpak IC, *n*-hexane/*i*-PrOH = 90/10, 1.0 mL/min,  $\lambda$  = 230 nm,  $t_1$  = 5.97 min,  $t_2$  = 7.88 min];

<sup>1</sup>H NMR (400 MHz, CDCl<sub>3</sub>)  $\delta$  7.94 (d,  $J$  = 8.0 Hz, 1H), 7.75 – 7.72 (m, 2H), 7.60 (s, 1H), 7.49 – 7.44 (m, 3H), 7.23 (dd,  $J$  = 8.0, 1.6 Hz, 1H), 4.83 (s, 1H), 2.47 (s, 3H), 2.08 (s, 3H), 1.15 (s, 3H);

<sup>13</sup>C{<sup>1</sup>H} NMR (101 MHz, CDCl<sub>3</sub>)  $\delta$  211.5, 163.1, 149.2, 147.1, 131.6, 130.4, 129.2, 129.1, 128.5, 126.6, 124.5, 118.6, 90.6, 74.5, 27.3, 25.8, 22.2 ppm;

**m.p.** 164.7 – 169.3 °C;

**HRMS** (ESI)  $m/z$  [M+Na]<sup>+</sup> calcd for C<sub>19</sub>H<sub>18</sub>O<sub>4</sub>Na: 333.1097, found: 333.1094;

$[\alpha]_D^{21}$  = +301.7 ( $c$  = 0.29 in CHCl<sub>3</sub>);

**IR** (neat): 3475, 2922, 2361, 1740, 1706, 1610, 1449, 1359, 1269, 1218, 1105, 1054, 773, 701, 588 cm<sup>-1</sup>.

HPLC spectrum of **C21**

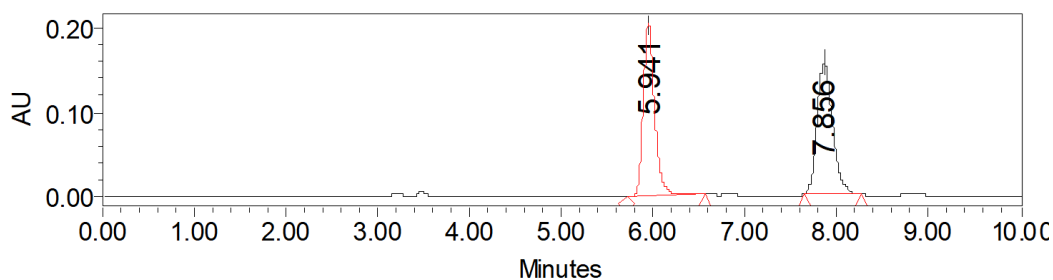

|   | Retention Time | Area    | % Area |
|---|----------------|---------|--------|
| 1 | 5.941          | 1737080 | 48.64  |
| 2 | 7.856          | 1834056 | 51.36  |

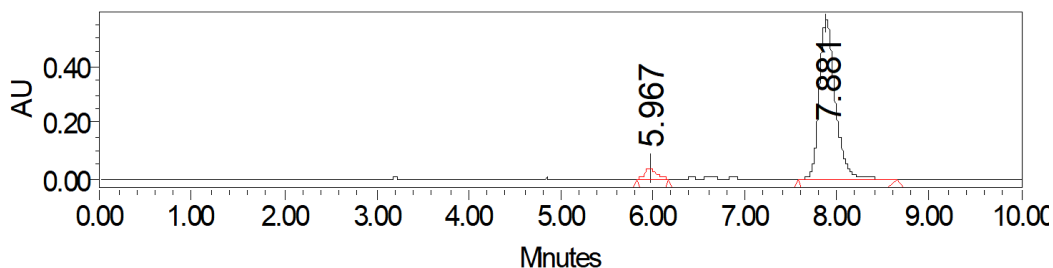

|   | Retention Time | Area    | % Area |
|---|----------------|---------|--------|
| 1 | 5.967          | 311761  | 4.41   |
| 2 | 7.881          | 6763155 | 95.59  |

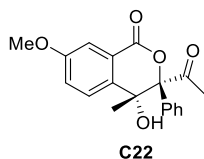

**(3S,4R)-3-acetyl-4-hydroxy-7-methoxy-4-methyl-3-phenylisochroman-1-one**

The residue was purified by column chromatography on silica gel (PE/CH<sub>2</sub>Cl<sub>2</sub> = 1/1.5) to afford the desired product **C22**; 0.1 mmol scale reaction; 16.0 mg, white solid, 49% yield, 96% ee; determined by HPLC analysis [Daicel chiralpak IC, *n*-hexane/*i*-PrOH = 90/10, 1.0 mL/min,  $\lambda$  = 230 nm,  $t_1$  = 8.78 min,  $t_2$  = 12.07 min];

<sup>1</sup>H NMR (400 MHz, CDCl<sub>3</sub>)  $\delta$  7.99 (d,  $J$  = 8.8 Hz, 1H), 7.74 – 7.71 (m, 2H), 7.49 – 7.41 (m, 3H), 7.27 – 7.26 (m, 1H), 6.91 (dd,  $J$  = 8.4, 2.4 Hz, 1H), 4.89 (s, 1H), 3.92 (s, 3H), 2.08 (s, 3H), 1.15 (s, 3H);

<sup>13</sup>C{<sup>1</sup>H} NMR (101 MHz, CDCl<sub>3</sub>)  $\delta$  211.6, 165.6, 162.8, 152.0, 132.9, 131.6, 129.1, 128.4, 126.6, 114.8, 113.6, 108.4, 90.5, 74.6, 55.8, 27.2, 25.6 ppm;

**m.p.** 127.2 – 129.8 °C;

**HRMS** (ESI)  $m/z$  [M+Na]<sup>+</sup> calcd for C<sub>19</sub>H<sub>18</sub>O<sub>5</sub>Na: 349.1046, found: 349.1041;

**[ $\alpha$ ]<sub>D</sub><sup>28</sup>** = +372.5 ( $c$  = 0.49 in CHCl<sub>3</sub>);

**IR** (neat): 3476, 2933, 2846, 2332, 1732, 1605, 1492, 1449, 1358, 1329, 1274, 1093, 1049, 773, 733, 702, 597 cm<sup>-1</sup>.

HPLC spectrum of **C22**

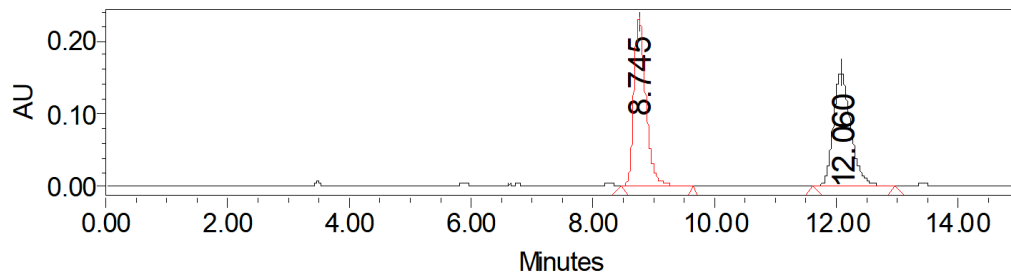

|   | Retention Time | Area    | % Area |
|---|----------------|---------|--------|
| 1 | 8.745          | 3198032 | 50.29  |
| 2 | 12.060         | 3160710 | 49.71  |

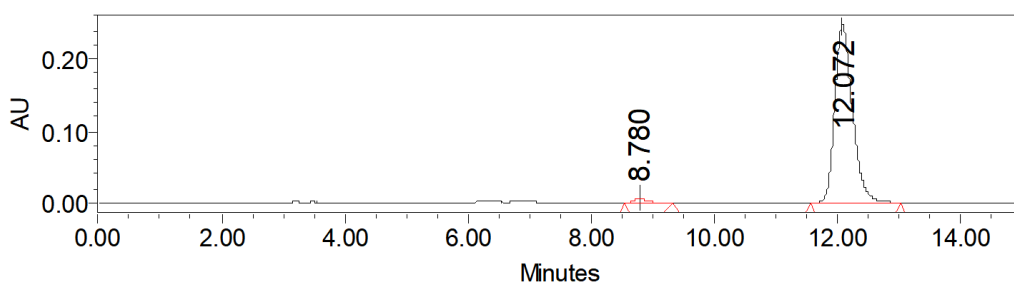

|   | Retention Time | Area    | % Area |
|---|----------------|---------|--------|
| 1 | 8.780          | 100233  | 1.99   |
| 2 | 12.072         | 4925776 | 98.01  |

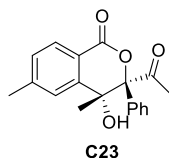

**(3S,4R)-3-acetyl-4-hydroxy-4,6-dimethyl-3-phenylisochroman-1-one**

The residue was purified by column chromatography on silica gel (PE/CH<sub>2</sub>Cl<sub>2</sub> = 1/1.5) to afford the desired product **C23**; 0.1 mmol scale reaction; 25.8 mg, white solid, 83% yield, 94% ee; determined by HPLC analysis [Daicel chiralpak IC, *n*-hexane/*i*-PrOH = 90/10, 1.0 mL/min,  $\lambda$  = 230 nm,  $t_1$  = 5.40 min,  $t_2$  = 6.46 min];

<sup>1</sup>H NMR (400 MHz, CDCl<sub>3</sub>)  $\delta$  7.86 (s, 1H), 7.75 – 7.73 (m, 2H), 7.69 (d,  $J$  = 8.0 Hz, 1H), 7.52 – 7.43 (m, 4H), 4.83 (s, 1H), 2.41 (s, 3H), 2.07 (s, 3H), 1.14 (s, 3H);

<sup>13</sup>C{<sup>1</sup>H} NMR (101 MHz, CDCl<sub>3</sub>)  $\delta$  211.3, 163.2, 146.4, 138.3, 136.6, 131.6, 130.4, 129.1, 128.5, 126.5, 124.1, 121.1, 90.7, 74.5, 27.3, 25.8, 20.9 ppm;

**m.p.** 116.6 – 118.1 °C;

**HRMS** (ESI)  $m/z$  [M+Na]<sup>+</sup> calcd for C<sub>19</sub>H<sub>18</sub>O<sub>4</sub>Na: 333.1097, found: 333.1093;

$[\alpha]_D^{21}$  = +419.4 ( $c$  = 0.79 in CHCl<sub>3</sub>);

**IR** (neat): 3477, 2987, 2929, 1737, 1707, 1495, 1447, 1358, 1262, 1212, 1181, 1110, 1051, 780, 737, 698, 563 cm<sup>-1</sup>.

HPLC spectrum of **C23**

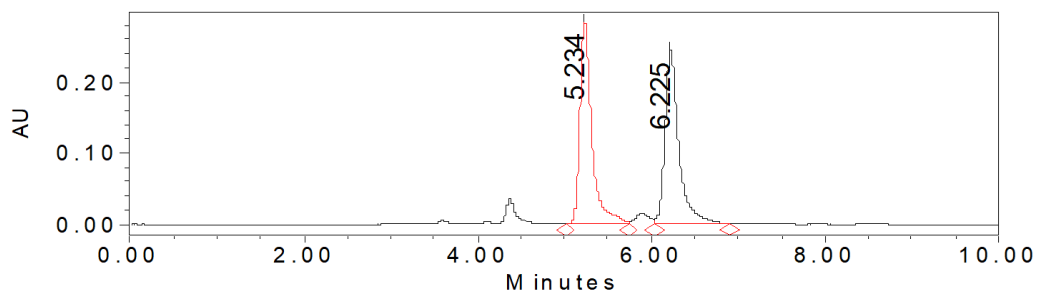

|   | Retention Time | Area    | % Area |
|---|----------------|---------|--------|
| 1 | 5.234          | 2742574 | 50.09  |
| 2 | 6.225          | 2732882 | 49.91  |

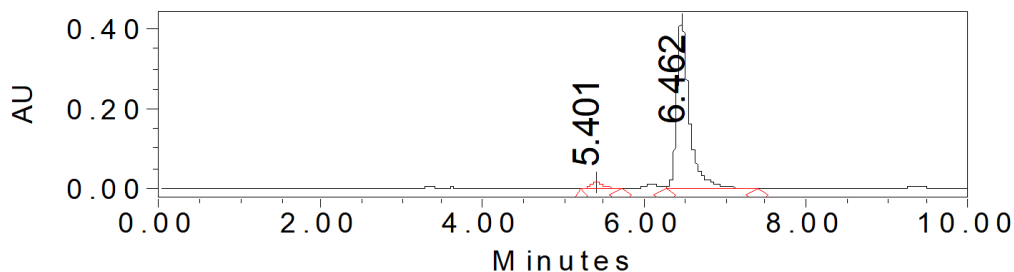

|   | Retention Time | Area    | % Area |
|---|----------------|---------|--------|
| 1 | 5.401          | 142897  | 3.01   |
| 2 | 6.462          | 4605005 | 96.99  |

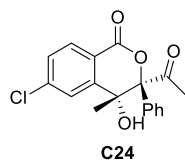

**(3S,4R)-3-acetyl-6-chloro-4-hydroxy-4-methyl-3-phenylisochroman-1-one**

The residue was purified by column chromatography on silica gel (PE/CH<sub>2</sub>Cl<sub>2</sub> = 1/1.5) to afford the desired product **C24**; 0.1 mmol scale reaction; 13.9 mg, white solid, 42% yield, 94% ee; determined by HPLC analysis [Daicel chiralpak IA, *n*-hexane/*i*-PrOH = 90/10, 1.0 mL/min,  $\lambda$  = 230 nm,  $t_1$  = 5.37 min,  $t_2$  = 6.69 min];

<sup>1</sup>H NMR (400 MHz, CDCl<sub>3</sub>)  $\delta$  8.02 (d,  $J$  = 2.4 Hz, 1H), 7.77 (d,  $J$  = 8.4 Hz, 1H), 7.73 – 7.69 (m, 2H), 7.66 (dd,  $J$  = 8.4, 2.4 Hz, 1H), 7.50 – 7.43 (m, 3H), 4.88 (s, 1H), 2.08 (s, 3H), 1.14 (s, 3H);

<sup>13</sup>C{<sup>1</sup>H} NMR (101 MHz, CDCl<sub>3</sub>)  $\delta$  210.9, 161.8, 147.6, 135.7, 134.5, 131.2, 129.9, 129.3, 128.6, 126.4, 126.0, 122.8, 90.7, 74.3, 27.2, 25.8 ppm;

**m.p.** 110.7 – 114.9 °C;

**HRMS** (ESI)  $m/z$  [M+Na]<sup>+</sup> calcd for C<sub>18</sub>H<sub>15</sub><sup>34.9689</sup>ClO<sub>4</sub>Na: 353.0551, found: 353.0551;

**HRMS** (ESI)  $m/z$  [M+Na]<sup>+</sup> calcd for C<sub>18</sub>H<sub>15</sub><sup>36.9659</sup>ClO<sub>4</sub>Na: 355.0522, found: 355.0518;

$[\alpha]_D^{20}$  = +387.4 ( $c$  = 0.52 in CHCl<sub>3</sub>);

**IR** (neat): 3474, 3068, 2856, 1740, 1707, 1458, 1409, 1358, 1248, 1213, 1109, 1049, 840, 766, 719, 699, 604, 558 cm<sup>-1</sup>.

HPLC spectrum of **C24**

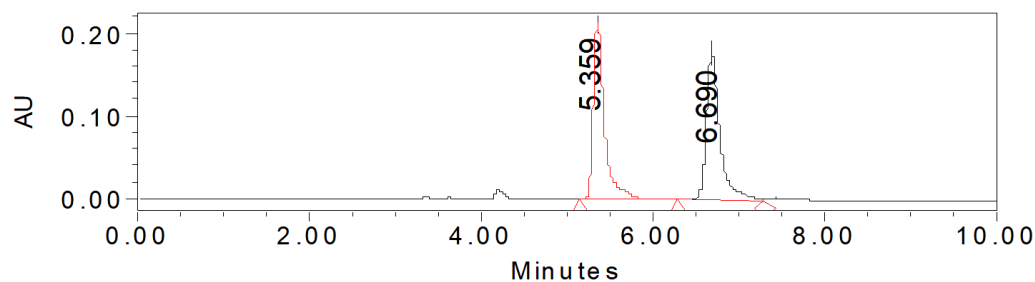

|   | Retention Time | Area    | % Area |
|---|----------------|---------|--------|
| 1 | 5.359          | 1987684 | 50.16  |
| 2 | 6.690          | 1974887 | 49.84  |

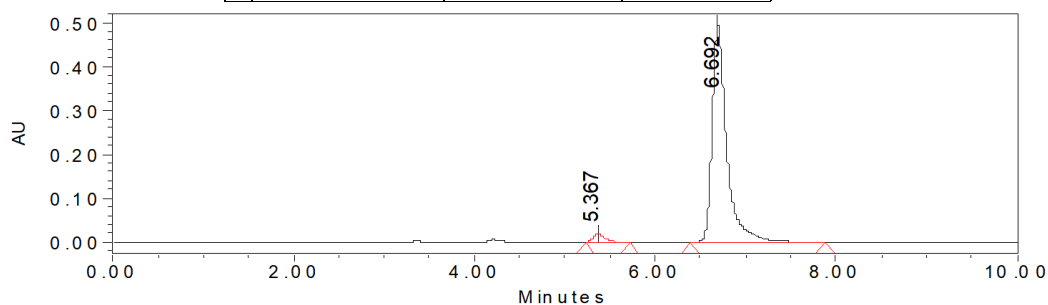

|   | Retention Time | Area    | % Area |
|---|----------------|---------|--------|
| 1 | 5.367          | 161919  | 2.79   |
| 2 | 6.692          | 5634501 | 97.21  |

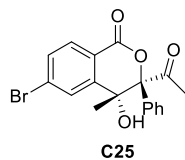

**(3S,4R)-3-acetyl-6-bromo-4-hydroxy-4-methyl-3-phenylisochroman-1-one**

The residue was purified by column chromatography on silica gel (PE/CH<sub>2</sub>Cl<sub>2</sub> = 1/1.5) to afford the desired product **C25**; 0.1 mmol scale reaction; 30.8 mg, white solid, 82% yield, 94% ee; determined by HPLC analysis [Daicel chiralpak IA, *n*-hexane/*i*-PrOH = 90/10, 1.0 mL/min,  $\lambda$  = 230 nm,  $t_1$  = 5.49 min,  $t_2$  = 7.01 min];

<sup>1</sup>H NMR (400 MHz, CDCl<sub>3</sub>)  $\delta$  8.18 (d,  $J$  = 2.0 Hz, 1H), 7.81 (dd,  $J$  = 8.4, 2.0 Hz, 1H), 7.73 – 7.69 (m, 3H), 7.50 – 7.45 (m, 3H), 4.87 (s, 1H), 2.08 (s, 3H), 1.14 (s, 3H);

<sup>13</sup>C{<sup>1</sup>H} NMR (101 MHz, CDCl<sub>3</sub>)  $\delta$  210.9, 161.7, 148.1, 138.6, 132.9, 131.2, 129.3, 128.6, 126.4, 126.2, 123.0, 122.2, 90.7, 74.4, 27.2, 25.8 ppm;

**m.p.** 110.4 – 113.6 °C;

**HRMS** (ESI)  $m/z$  [M+Na]<sup>+</sup> calcd for C<sub>18</sub>H<sub>15</sub><sup>78.9183</sup>BrO<sub>4</sub>Na: 397.0046, found: 397.0044;

**HRMS** (ESI)  $m/z$  [M+Na]<sup>+</sup> calcd for C<sub>18</sub>H<sub>15</sub><sup>80.9163</sup>BrO<sub>4</sub>Na: 399.0025, found: 399.0023;

$[\alpha]_D^{21}$  = +332.6 ( $c$  = 0.63 in CHCl<sub>3</sub>);

**IR** (neat): 3474, 3067, 2932, 2361, 1743, 1707, 1449, 1404, 1358, 1245, 1213, 1108, 1050, 762, 713, 700, 609, 556 cm<sup>-1</sup>.

HPLC spectrum of **C25**

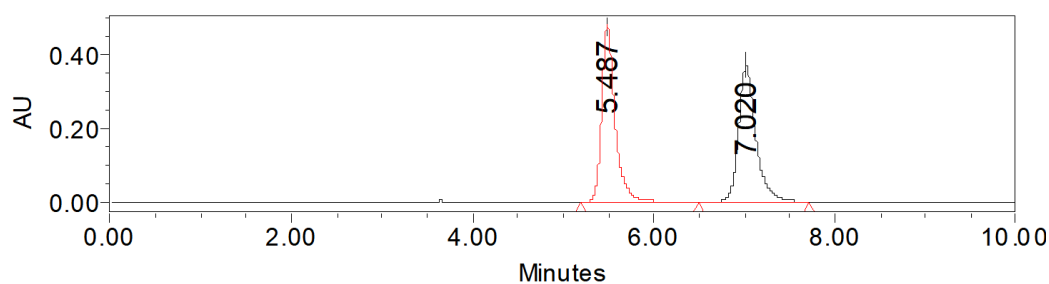

|   | Retention Time | Area    | % Area |
|---|----------------|---------|--------|
| 1 | 5.487          | 4845550 | 50.14  |
| 2 | 7.020          | 4818639 | 49.86  |

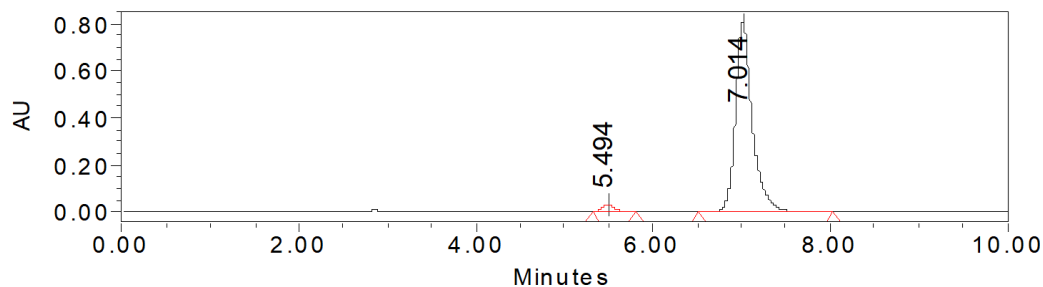

|   | Retention Time | Area     | % Area |
|---|----------------|----------|--------|
| 1 | 5.494          | 309841   | 2.78   |
| 2 | 7.014          | 10826655 | 97.22  |

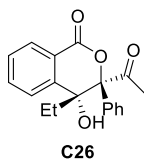

**(3S,4R)-3-acetyl-4-ethyl-4-hydroxy-3-phenylisochroman-1-one**

The residue was purified by column chromatography on silica gel (PE/CH<sub>2</sub>Cl<sub>2</sub> = 1/1.5) to afford the desired product **C26**; 0.1 mmol scale reaction; 19.6 mg, colorless oil, 63% yield, 96% ee; determined by HPLC analysis [Daicel chiralpak IA, *n*-hexane/*i*-PrOH = 90/10, 1.0 mL/min,  $\lambda$  = 230 nm,  $t_1$  = 5.05 min,  $t_2$  = 6.05 min];

<sup>1</sup>H NMR (400 MHz, CDCl<sub>3</sub>)  $\delta$  8.06 (d,  $J$  = 7.6 Hz, 1H), 7.76 – 7.67 (m, 4H), 7.49 – 7.42 (m, 4H), 4.83 (d,  $J$  = 2.4 Hz, 1H), 2.05 (s, 3H), 1.66 – 1.58 (m, 2H), 1.39 – 1.30 (m, 1H), 0.58 (t,  $J$  = 7.2 Hz, 3H);

<sup>13</sup>C{<sup>1</sup>H} NMR (101 MHz, CDCl<sub>3</sub>)  $\delta$  211.4, 163.1, 146.6, 134.7, 131.5, 130.3, 129.1, 128.5, 128.3, 126.7, 126.0, 121.8, 91.1, 76.5, 29.4, 27.2, 6.5 ppm;

HRMS (ESI)  $m/z$  [M+Na]<sup>+</sup> calcd for C<sub>19</sub>H<sub>18</sub>O<sub>4</sub>Na: 333.1097, found: 333.1093;

[ $\alpha$ ]<sub>D</sub><sup>21</sup> = +374.7 ( $c$  = 0.44 in CHCl<sub>3</sub>);

IR (neat): 3478, 2974, 2937, 2361, 1741, 1707, 1603, 1452, 1358, 1289, 1249, 1102, 1068, 772, 752, 710, 594 cm<sup>-1</sup>.

HPLC spectrum of **C26**

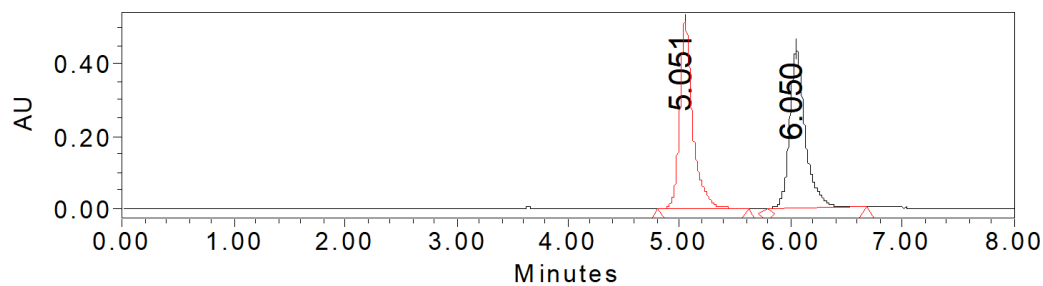

|   | Retention Time | Area    | % Area |
|---|----------------|---------|--------|
| 1 | 5.051          | 4250009 | 49.59  |
| 2 | 6.050          | 4320069 | 50.41  |



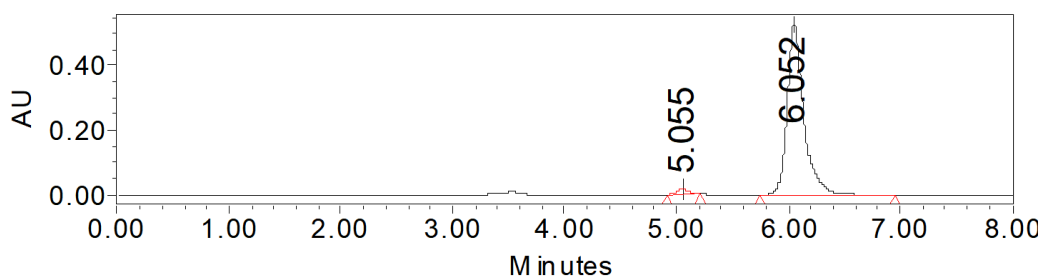

|   | Retention Time | Area    | % Area |
|---|----------------|---------|--------|
| 1 | 5.055          | 110384  | 1.99   |
| 2 | 6.052          | 5436258 | 98.01  |

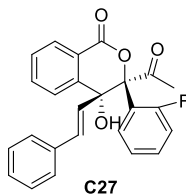

**(3S,4R)-3-acetyl-3-(2-fluorophenyl)-4-hydroxy-4-((E)-styryl)isochroman-1-one**

The residue was purified by column chromatography on silica gel (PE/CH<sub>2</sub>Cl<sub>2</sub> = 1/1) to afford the desired product **C27**; 0.1 mmol scale reaction; 29.7 mg, white solid, 74% yield, 82% ee; determined by HPLC analysis [Daicel chiralpak ID, *n*-hexane/*i*-PrOH = 80/20, 1.0 mL/min,  $\lambda$  = 254 nm,  $t_1$  = 7.95 min,  $t_2$  = 15.79 min];

<sup>1</sup>H NMR (400 MHz, CDCl<sub>3</sub>)  $\delta$  8.08 (d,  $J$  = 7.6 Hz, 1H), 7.79 – 7.70 (m, 3H), 7.46 (td,  $J$  = 7.6, 1.6 Hz, 1H), 7.42 – 7.37 (m, 1H), 7.24 – 7.18 (m, 4H), 7.14 – 7.10 (m, 3H), 6.15 (d,  $J$  = 16.0 Hz, 1H), 6.01 (d,  $J$  = 16.0 Hz, 1H), 4.71 (s, 1H), 2.23 (s, 3H);

<sup>13</sup>C{<sup>1</sup>H} NMR (101 MHz, CDCl<sub>3</sub>)  $\delta$  206.9, 162.6, 159.6 (d,  $J_{C-F}$  = 249.5 Hz), 146.2, 135.9, 135.8, 131.7, 131.3 (d,  $J_{C-F}$  = 8.1 Hz), 130.2, 129.9 (d,  $J_{C-F}$  = 3.0 Hz), 128.4, 128.2, 128.0, 127.9, 126.6, 124.8, 124.1 (d,  $J_{C-F}$  = 3.0 Hz), 121.5, 120.9 (d,  $J_{C-F}$  = 11.1 Hz), 116.3 (d,  $J_{C-F}$  = 23.2 Hz), 88.3 (d,  $J_{C-F}$  = 5.1 Hz), 76.5, 26.4 ppm;

<sup>19</sup>F{<sup>1</sup>H} NMR (376 MHz, CDCl<sub>3</sub>)  $\delta$  -109.72 ppm;

**m.p.** 135.5 – 138.4 °C;

**HRMS** (ESI)  $m/z$  [M+Na]<sup>+</sup> calcd for C<sub>25</sub>H<sub>19</sub>FO<sub>4</sub>Na: 425.1160, found: 425.1158;

**[ $\alpha$ ]<sub>D</sub><sup>27</sup>** = +438.1 ( $c$  = 0.58 in CHCl<sub>3</sub>);

**IR** (neat): 3500, 3067, 2924, 2360, 1740, 1490, 1453, 1359, 1284, 1246, 1077, 1035, 768, 694 cm<sup>-1</sup>.

HPLC spectrum of **C27**

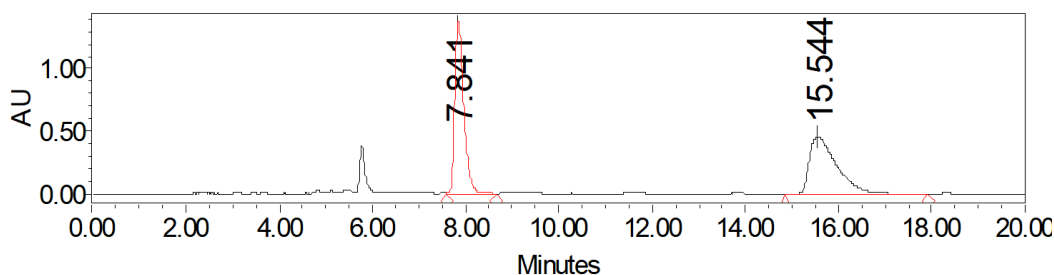

|   | Retention Time | Area     | % Area |
|---|----------------|----------|--------|
| 1 | 7.841          | 18064852 | 49.71  |
| 2 | 15.544         | 18275148 | 50.29  |

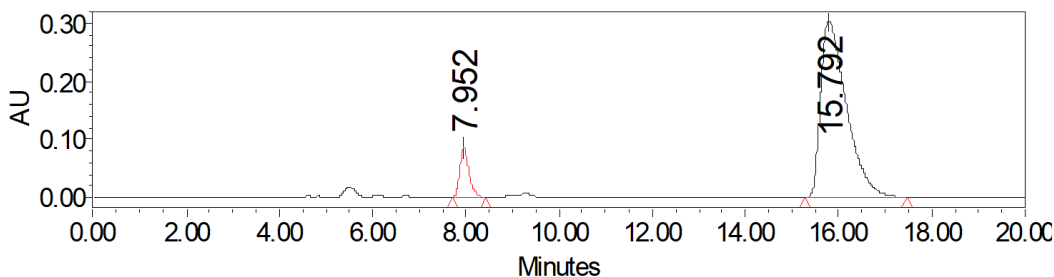

|   | Retention Time | Area     | % Area |
|---|----------------|----------|--------|
| 1 | 7.952          | 1153454  | 8.93   |
| 2 | 15.792         | 11761161 | 91.07  |

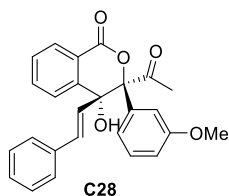

**(3*S*,4*R*)-3-acetyl-4-hydroxy-3-(3-methoxyphenyl)-4-((*E*)-styryl)isochroman-1-one**

The residue was purified by column chromatography on silica gel (PE/CH<sub>2</sub>Cl<sub>2</sub> = 1/2) to afford the desired product **C28**; 0.1 mmol scale reaction; 38.1 mg, white solid, 92% yield, 96% ee; determined by HPLC analysis [Daicel chiralpak IA, *n*-hexane/*i*-PrOH = 90/10, 1.0 mL/min, λ = 254 nm, t<sub>1</sub> = 9.91 min, t<sub>2</sub> = 11.16 min];

<sup>1</sup>H NMR (400 MHz, CDCl<sub>3</sub>) δ 8.11 (d, *J* = 7.2 Hz, 1H), 7.81 (d, *J* = 7.6 Hz, 1H), 7.73 (td, *J* = 7.6, 1.6 Hz, 1H), 7.49 (td, *J* = 7.6, 1.2 Hz, 1H), 7.34 (t, *J* = 8.0 Hz, 1H), 7.26 – 7.16 (m, 5H), 7.11 – 7.09 (m, 2H), 6.96 – 6.93 (m, 1H), 6.11 (d, *J* = 16.0 Hz, 1H), 6.00 (d, *J* = 16.0 Hz, 1H), 5.21 (s, 1H), 3.79 (s, 3H), 2.14 (s, 3H);

<sup>13</sup>C{<sup>1</sup>H} NMR (101 MHz, CDCl<sub>3</sub>) δ 211.0, 163.0, 159.5, 146.3, 136.0, 135.8, 132.8, 132.1, 130.2, 129.3, 128.6, 128.4, 128.0, 127.8, 126.6, 125.2, 122.0, 118.9, 114.9, 112.3, 90.5, 76.8, 55.4, 27.4 ppm;

**m.p.** 99.8 – 104.2 °C;

**HRMS** (ESI) *m/z* [M+Na]<sup>+</sup> calcd for C<sub>26</sub>H<sub>22</sub>O<sub>5</sub>Na: 437.1359, found: 437.1359;

[α]<sub>D</sub><sup>21</sup> = +488.7 (*c* = 0.99 in CHCl<sub>3</sub>);

**IR** (neat): 3464, 3023, 2924, 1737, 1706, 1602, 1490, 1454, 1357, 1287, 1247, 1078, 1040, 969, 749, 721, 691, 558 cm<sup>-1</sup>.

HPLC spectrum of **C28**

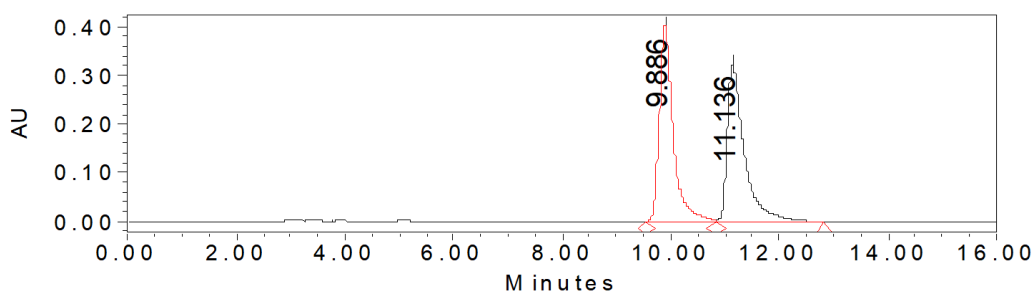

|   | Retention Time | Area    | % Area |
|---|----------------|---------|--------|
| 1 | 9.886          | 7221578 | 50.17  |
| 2 | 11.136         | 7172165 | 49.83  |

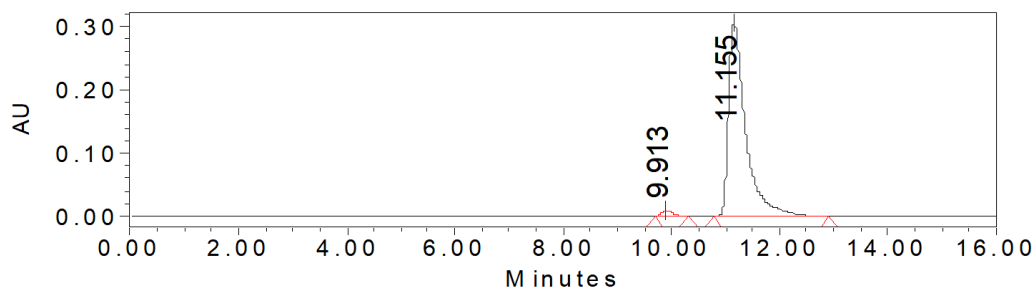

|   | Retention Time | Area    | % Area |
|---|----------------|---------|--------|
| 1 | 9.913          | 129424  | 1.87   |
| 2 | 11.155         | 6781096 | 98.13  |

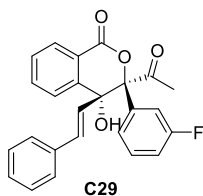

**(3*S*,4*R*)-3-acetyl-3-(3-fluorophenyl)-4-hydroxy-4-((*E*)-styryl)isochroman-1-one**

The residue was purified by column chromatography on silica gel (PE/CH<sub>2</sub>Cl<sub>2</sub> = 1/1) to afford the desired product **C29**; 0.1 mmol scale reaction; 35.0 mg, white solid, 87% yield, 94% ee; determined by HPLC analysis [Daicel chiralpak IA, *n*-hexane/*i*-PrOH = 90/10, 1.0 mL/min, λ = 254 nm, t<sub>1</sub> = 8.00 min, t<sub>2</sub> = 9.23 min];

<sup>1</sup>H NMR (400 MHz, CDCl<sub>3</sub>) δ 8.13 – 8.11 (m, 1H), 7.81 (dd, *J* = 8.0, 1.2 Hz, 1H), 7.74 (td, *J* = 7.6, 1.6 Hz, 1H), 7.52 – 7.44 (m, 3H), 7.43 – 7.37 (m, 1H), 7.23 – 7.17 (m, 3H), 7.13 – 7.08 (m, 3H), 6.17 (d, *J* = 15.6 Hz, 1H), 5.98 (dd, *J* = 15.6, 1.2 Hz, 1H), 5.22 (d, *J* = 1.2 Hz, 1H), 2.14 (s, 3H);

<sup>13</sup>C{<sup>1</sup>H} NMR (101 MHz, CDCl<sub>3</sub>) δ 210.8, 162.6, 162.6 (d, *J*<sub>C-F</sub> = 247.4 Hz), 146.1, 135.9, 135.8, 134.0 (d, *J*<sub>C-F</sub> = 8.1 Hz), 132.3, 130.3, 129.9 (d, *J*<sub>C-F</sub> = 8.1 Hz), 128.7, 128.4, 128.1, 127.2, 126.6, 125.1, 122.3 (d, *J*<sub>C-F</sub> = 4.0 Hz), 121.8, 116.3 (d, *J*<sub>C-F</sub> = 21.2 Hz), 114.1 (d, *J*<sub>C-F</sub> = 25.3 Hz), 89.9, 76.8, 27.4 ppm;

<sup>19</sup>F{<sup>1</sup>H} NMR (376 MHz, CDCl<sub>3</sub>) δ -111.59 ppm;

**m.p.** 64.6 – 67.0 °C;

**HRMS** (ESI)  $m/z$   $[M+Na]^+$  calcd for  $C_{25}H_{19}FO_4Na$ : 425.1159, found: 425.1151;

$[\alpha]_D^{21} = +448.5$  ( $c = 1.02$  in  $CHCl_3$ );

**IR** (neat): 3466, 3078, 3026, 1739, 1707, 1589, 1487, 1442, 1358, 1288, 1248, 1210, 1079, 970, 786, 750, 721, 689, 558  $cm^{-1}$ .

HPLC spectrum of **C29**

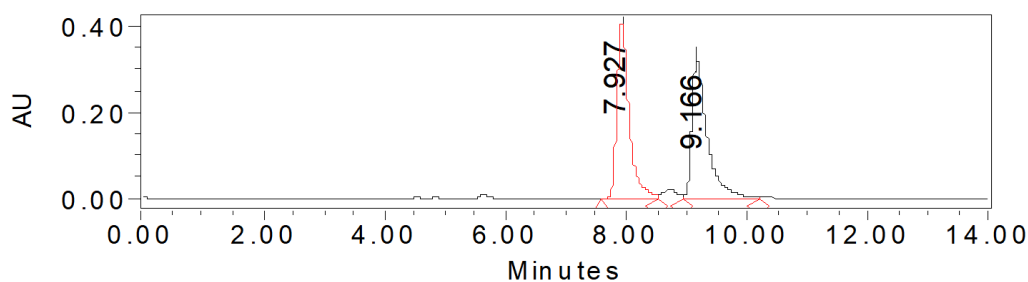

|   | Retention Time | Area    | % Area |
|---|----------------|---------|--------|
| 1 | 7.927          | 5734876 | 49.68  |
| 2 | 9.166          | 5809593 | 50.32  |

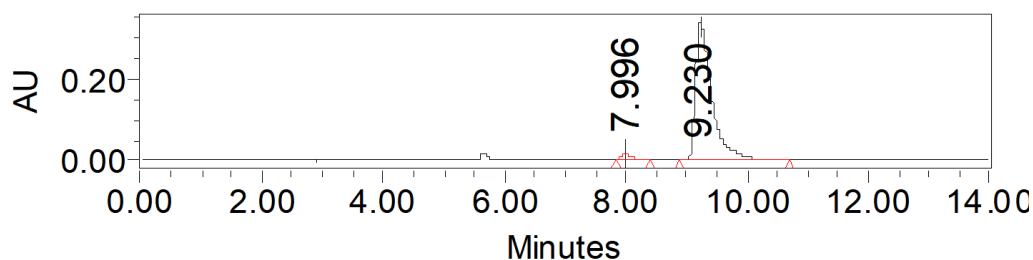

|   | Retention Time | Area    | % Area |
|---|----------------|---------|--------|
| 1 | 7.996          | 190711  | 2.88   |
| 2 | 9.230          | 6435069 | 97.12  |

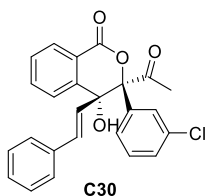

**(3*S*,4*R*)-3-acetyl-3-(3-chlorophenyl)-4-hydroxy-4-((*E*)-styryl)isochroman-1-one**

The residue was purified by column chromatography on silica gel (PE/ $CH_2Cl_2$  = 1/1) to afford the desired product **C30**; 0.1 mmol scale reaction; 33.9 mg, white solid, 81% yield, 93% ee; determined by HPLC analysis [Daicel chiralpak IA, *n*-hexane/*i*-PrOH = 90/10, 1.0 mL/min,  $\lambda$  = 254 nm,  $t_1$  = 7.95 min,  $t_2$  = 9.71 min];

**$^1H$  NMR** (400 MHz,  $CDCl_3$ )  $\delta$  8.13 – 8.11 (m, 1H), 7.82 – 7.79 (m, 1H), 7.75 – 7.71 (m, 2H), 7.60 (dt,  $J$  = 7.2, 1.2 Hz, 1H), 7.50 (td,  $J$  = 7.2, 1.2 Hz, 1H), 7.39 – 7.34 (m, 2H), 7.23 – 7.17 (m, 3H), 7.11 – 7.09 (m, 2H), 6.17 (d,  $J$  = 16.0 Hz, 1H), 5.97 (dd,  $J$  = 16.0, 1.2 Hz, 1H), 5.20 (d,  $J$  = 1.2 Hz, 1H), 2.14 (s, 3H);

**$^{13}C\{^1H\}$  NMR** (101 MHz,  $CDCl_3$ )  $\delta$  210.7, 162.6, 146.0, 135.9, 135.8, 134.5, 133.5, 132.4, 130.3, 129.6, 129.4, 128.7, 128.4, 128.1, 127.2, 126.8, 126.7, 125.1, 124.8, 121.8, 89.9, 76.8, 27.5 ppm;

**m.p.** 60.2 – 64.4  $^{\circ}C$ ;

**HRMS** (ESI)  $m/z$   $[M+Na]^+$  calcd for  $C_{25}H_{19}^{34.9689}ClO_4Na$ : 441.0864, found: 441.0866;

**HRMS** (ESI)  $m/z$   $[M+Na]^+$  calcd for  $C_{25}H_{19}^{36.9659}ClO_4Na$ : 443.0835, found: 443.0836;

$[\alpha]_D^{20} = +462.4$  ( $c = 0.73$  in  $CHCl_3$ );

**IR** (neat): 3067, 2924, 1741, 1707, 1600, 1477, 1454, 1358, 1287, 1247, 1213, 1080, 970, 772, 750, 690, 560  $cm^{-1}$ .

HPLC spectrum of **C30**

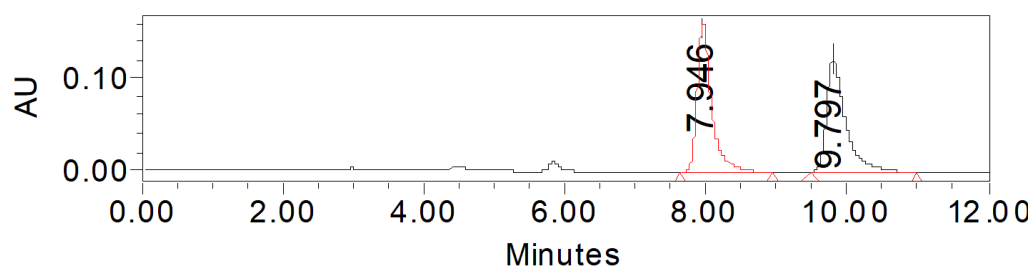

|   | Retention Time | Area    | % Area |
|---|----------------|---------|--------|
| 1 | 7.946          | 2348109 | 49.90  |
| 2 | 9.797          | 2357440 | 50.10  |

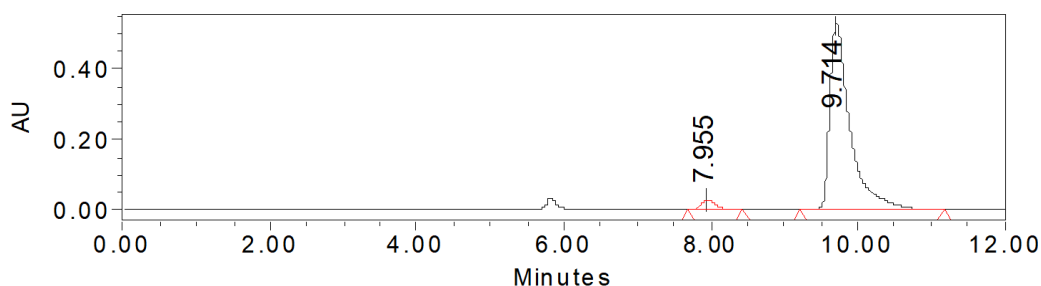

|   | Retention Time | Area     | % Area |
|---|----------------|----------|--------|
| 1 | 7.955          | 378559   | 3.57   |
| 2 | 9.714          | 10234872 | 96.43  |

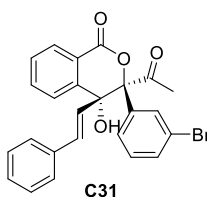

**(3S,4R)-3-acetyl-3-(3-bromophenyl)-4-hydroxy-4-((E)-styryl)isochroman-1-one**

The residue was purified by column chromatography on silica gel (PE/CH<sub>2</sub>Cl<sub>2</sub> = 1/1) to afford the desired product **C31**; 0.1 mmol scale reaction; 40.3 mg, white solid, 87% yield, 93% ee; determined by HPLC analysis [Daicel chiralpak IA, *n*-hexane/*i*-PrOH = 90/10, 1.0 mL/min,  $\lambda$  = 254 nm,  $t_1$  = 8.13 min,  $t_2$  = 10.12 min];

**<sup>1</sup>H NMR** (400 MHz, CDCl<sub>3</sub>)  $\delta$  8.12 (d,  $J$  = 7.6 Hz, 1H), 7.89 – 7.88 (m, 1H), 7.80 (d,  $J$  = 8.0 Hz, 1H), 7.76 – 7.72 (m, 1H), 7.65 – 7.62 (m, 1H), 7.56 – 7.53 (m, 1H), 7.52 – 7.48 (m, 1H), 7.30 (t,  $J$  = 8.0 Hz, 1H), 7.23 – 7.17 (m, 3H), 7.11 – 7.09 (m, 2H), 6.16 (d,  $J$  = 16.0 Hz, 1H), 5.95 (d,  $J$  = 16.0 Hz, 1H), 5.18 (s, 1H), 2.14 (s, 3H);

**<sup>13</sup>C{<sup>1</sup>H} NMR** (101 MHz, CDCl<sub>3</sub>)  $\delta$  210.8, 162.6, 146.0, 135.9, 135.8, 133.6, 132.5, 132.4, 130.3, 129.8, 129.6, 128.7, 128.4, 128.1, 127.2, 126.7, 125.3, 125.1, 122.6, 121.8, 89.8, 76.8, 27.5 ppm;

**m.p.** 109.5 – 111.7 °C;

**HRMS** (ESI)  $m/z$  [M+Na]<sup>+</sup> calcd for C<sub>25</sub>H<sub>19</sub><sup>78,9183</sup>BrO<sub>4</sub>Na: 485.0359, found: 485.0362;

**HRMS** (ESI)  $m/z$  [M+Na]<sup>+</sup> calcd for C<sub>25</sub>H<sub>19</sub><sup>80,9163</sup>BrO<sub>4</sub>Na: 487.0338, found: 487.0341;

**[ $\alpha$ ]<sub>D</sub><sup>20</sup>** = +394.8 ( $c$  = 0.53 in CHCl<sub>3</sub>);

**IR** (neat): 3464, 3024, 2920, 2361, 1741, 1707, 1600, 1566, 1454, 1357, 1287, 1246, 1210, 1078, 969, 748, 718, 692, 558 cm<sup>-1</sup>.

HPLC spectrum of **C31**

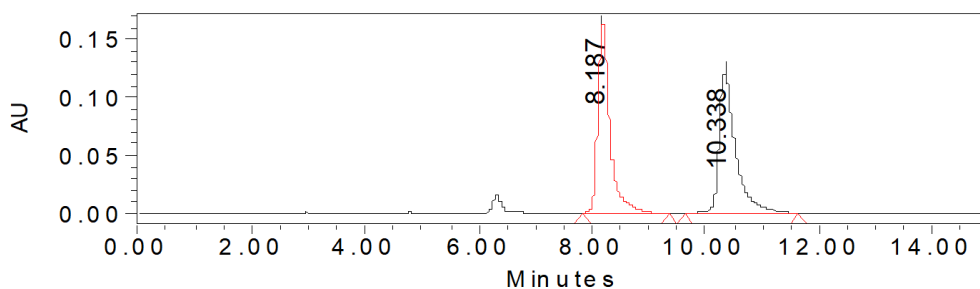

|   | Retention Time | Area    | % Area |
|---|----------------|---------|--------|
| 1 | 8.187          | 2433017 | 49.61  |
| 2 | 10.338         | 2471409 | 50.39  |

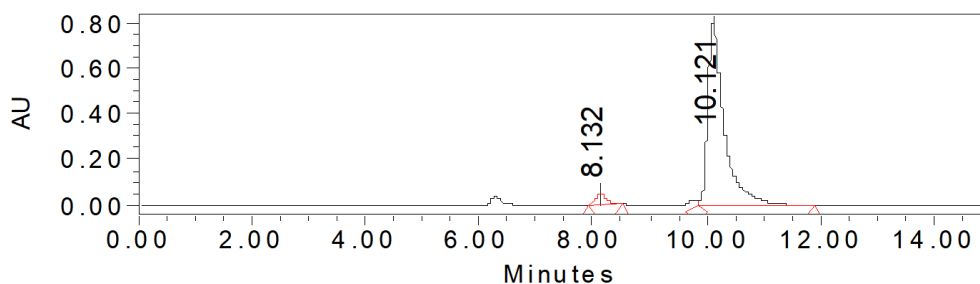

|  | Retention Time | Area | % Area |
|--|----------------|------|--------|
|--|----------------|------|--------|

|   |        |          |       |
|---|--------|----------|-------|
| 1 | 8.132  | 576315   | 3.43  |
| 2 | 10.121 | 16203249 | 96.57 |

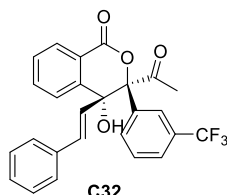

**C32**

**(3S,4R)-3-acetyl-4-hydroxy-4-((E)-styryl)-3-(3-(trifluoromethyl)phenyl)isochroman-1-one**

The residue was purified by column chromatography on silica gel (PE/CH<sub>2</sub>Cl<sub>2</sub> = 1/1) to afford the desired product **C32**; 0.1 mmol scale reaction; 38.4 mg, white solid, 85% yield, 92% ee; determined by HPLC analysis [Daicel chiralpak IA, *n*-hexane/*i*-PrOH = 90/10, 1.0 mL/min,  $\lambda$  = 254 nm,  $t_1$  = 6.38 min,  $t_2$  = 7.94 min];

<sup>1</sup>H NMR (400 MHz, CDCl<sub>3</sub>)  $\delta$  8.14 (dd,  $J$  = 8.0, 1.2 Hz, 1H), 8.00 (s, 1H), 7.89 – 7.86 (m, 1H), 7.81 – 7.79 (m, 1H), 7.75 (td,  $J$  = 7.2, 1.2 Hz, 1H), 7.69 – 7.67 (m, 1H), 7.58 – 7.49 (m, 2H), 7.22 – 7.14 (m, 3H), 7.08 – 7.05 (m, 2H), 6.14 (d,  $J$  = 16.0 Hz, 1H), 5.92 (dd,  $J$  = 15.6, 1.2 Hz, 1H), 5.21 (d,  $J$  = 1.2 Hz, 1H), 2.16 (s, 3H);

<sup>13</sup>C{<sup>1</sup>H} NMR (101 MHz, CDCl<sub>3</sub>)  $\delta$  210.8, 162.6, 145.9, 136.0, 135.7, 132.7, 132.5, 130.9 (q,  $J_{C-F}$  = 32.3 Hz), 130.4, 129.9, 129.9, 128.8, 128.4, 128.1, 127.0, 126.6, 126.5 (d,  $J_{C-F}$  = 273.7 Hz), 126.1 (d,  $J_{C-F}$  = 4.0 Hz), 125.1, 123.7 (d,  $J_{C-F}$  = 4.0 Hz), 121.7, 90.0, 76.8, 27.6 ppm;

<sup>19</sup>F{<sup>1</sup>H} NMR (376 MHz, CDCl<sub>3</sub>)  $\delta$  -62.49 ppm;

m.p. 50.5 – 52.5 °C;

HRMS (ESI)  $m/z$  [M+Na]<sup>+</sup> calcd for C<sub>26</sub>H<sub>19</sub>F<sub>3</sub>O<sub>4</sub>Na: 475.1128, found: 475.1129;

[ $\alpha$ ]<sub>D</sub><sup>21</sup> = +410.2 ( $c$  = 0.54 in CHCl<sub>3</sub>);

IR (neat): 3468, 2922, 2360, 1743, 1709, 1603, 1450, 1329, 1247, 1168, 1128, 1078, 768, 749, 696, 556 cm<sup>-1</sup>.

HPLC spectrum of **C32**

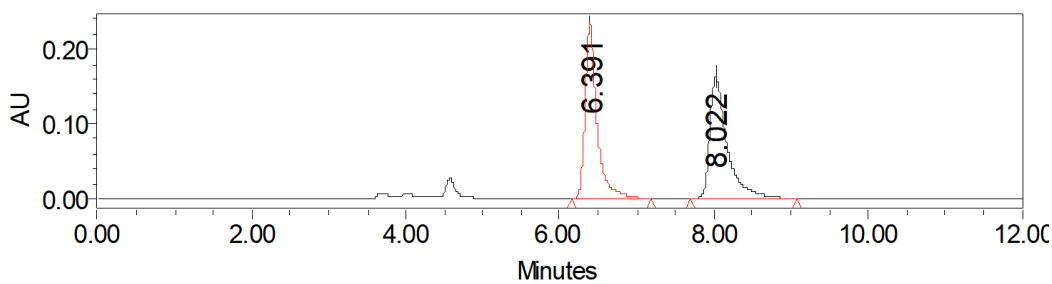

|   | Retention Time | Area    | % Area |
|---|----------------|---------|--------|
| 1 | 6.391          | 2560894 | 49.64  |
| 2 | 8.022          | 2597578 | 50.36  |

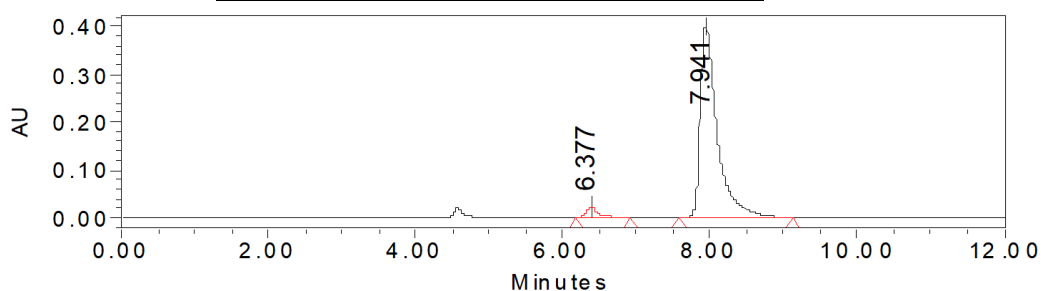

|   | Retention Time | Area    | % Area |
|---|----------------|---------|--------|
| 1 | 6.377          | 245154  | 3.64   |
| 2 | 7.941          | 6490950 | 96.36  |

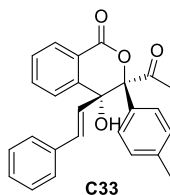

**C33**

**(3S,4R)-3-acetyl-4-hydroxy-4-((E)-styryl)-3-(p-tolyl)isochroman-1-one**

The residue was purified by column chromatography on silica gel (PE/CH<sub>2</sub>Cl<sub>2</sub> = 1/1) to afford the desired product **C33**; 0.1 mmol scale reaction; 36.6 mg, white solid, 92% yield, 94% ee; determined by HPLC analysis [Daicel chiralpak IA, *n*-hexane/*i*-PrOH = 90/10, 1.0 mL/min,  $\lambda$  = 254 nm,  $t_1$  = 8.59 min,  $t_2$  = 14.75 min];

**<sup>1</sup>H NMR** (400 MHz, CDCl<sub>3</sub>) δ 8.12 (d, *J* = 7.6 Hz, 1H), 7.82 – 7.80 (m, 1H), 7.72 (td, *J* = 7.6, 1.2 Hz, 1H), 7.56 (d, *J* = 8.4 Hz, 2H), 7.48 (td, *J* = 7.6, 1.2 Hz, 1H), 7.24 – 7.16 (m, 5H), 7.12 – 7.09 (m, 2H), 6.12 (d, *J* = 16.0 Hz, 1H), 6.01 (d, *J* = 16.0 Hz, 1H), 5.24 (s, 1H), 2.37 (s, 3H), 2.12 (s, 3H);

**<sup>13</sup>C{<sup>1</sup>H} NMR** (101 MHz, CDCl<sub>3</sub>) δ 211.2, 163.2, 146.4, 139.1, 136.0, 135.7, 132.0, 130.2, 129.0, 128.5, 128.4, 127.9, 127.9, 127.8, 126.7, 126.5, 125.1, 122.1, 90.7, 76.8, 27.3, 21.1 ppm;

**m.p.** 62.8 – 67.0 °C;

**HRMS** (ESI) *m/z* [M+Na]<sup>+</sup> calcd for C<sub>26</sub>H<sub>22</sub>O<sub>4</sub>Na: 421.1410, found: 421.1413;

[α]<sub>D</sub><sup>20</sup> = +509.1 (*c* = 0.58 in CHCl<sub>3</sub>);

**IR** (neat): 3463, 3029, 2920, 2361, 1740, 1706, 1603, 1453, 1358, 1289, 1248, 1081, 969, 769, 725, 693, 559 cm<sup>-1</sup>.

HPLC spectrum of **C33**

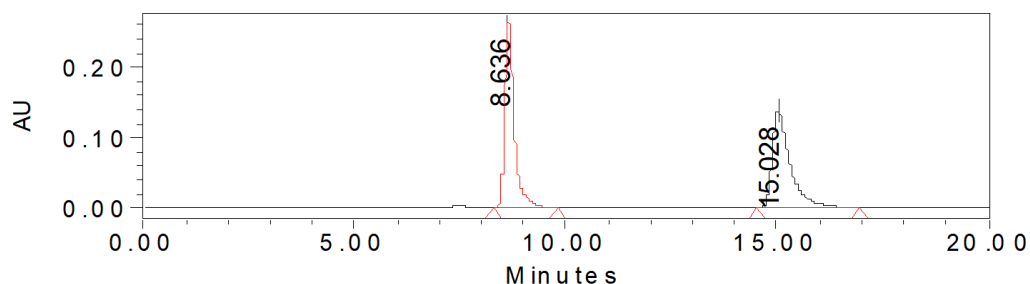

|   | Retention Time | Area    | % Area |
|---|----------------|---------|--------|
| 1 | 8.636          | 4200436 | 50.14  |
| 2 | 15.028         | 4176196 | 49.86  |

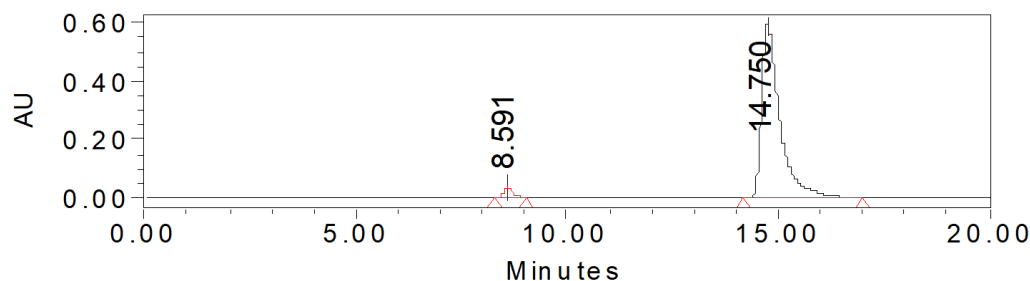

|   | Retention Time | Area     | % Area |
|---|----------------|----------|--------|
| 1 | 8.591          | 540084   | 2.92   |
| 2 | 14.750         | 17960208 | 97.08  |

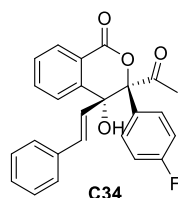

**(3S,4R)-3-acetyl-3-(4-fluorophenyl)-4-hydroxy-4-((E)-styryl)isochroman-1-one**

The residue was purified by column chromatography on silica gel (PE/CH<sub>2</sub>Cl<sub>2</sub> = 1/1) to afford the desired product **C34**; 0.1 mmol scale reaction; 37.4 mg, white solid, 93% yield, 94% ee; determined by HPLC analysis [Daicel chiralpak IA, *n*-hexane/*i*-PrOH = 90/10, 1.0 mL/min, λ = 254 nm, t<sub>1</sub> = 8.26 min, t<sub>2</sub> = 11.27 min];

**<sup>1</sup>H NMR** (400 MHz, CDCl<sub>3</sub>) δ 8.12 (dd, *J* = 8.0, 1.2 Hz, 1H), 7.80 (dd, *J* = 8.0, 1.2 Hz, 1H), 7.73 (td, *J* = 7.6, 1.6 Hz, 1H), 7.70 – 7.66 (m, 2H), 7.50 (td, *J* = 7.6, 1.6 Hz, 1H), 7.23 – 7.16 (m, 3H), 7.15 – 7.08 (m, 4H), 6.13 (d, *J* = 16.0 Hz, 1H), 5.96 (dd, *J* = 16.0, 1.2 Hz, 1H), 5.22 (d, *J* = 1.2 Hz, 1H), 2.13 (s, 3H);

**<sup>13</sup>C{<sup>1</sup>H} NMR** (101 MHz, CDCl<sub>3</sub>) δ 211.1, 163.2 (d, *J*<sub>C-F</sub> = 250.5 Hz), 162.8, 146.1, 135.9, 135.8, 132.3, 130.3, 128.7, 128.6 (d, *J*<sub>C-F</sub> = 12.1 Hz), 128.4, 128.1, 127.3, 127.2 (d, *J*<sub>C-F</sub> = 3.0 Hz), 126.6, 125.1, 121.9, 115.4 (d, *J*<sub>C-F</sub> = 21.2 Hz), 90.2, 76.8, 27.4 ppm;

**<sup>19</sup>F{<sup>1</sup>H} NMR** (376 MHz, CDCl<sub>3</sub>) δ -112.16 ppm;

**m.p.** 63.3 – 64.7 °C;

**HRMS** (ESI) *m/z* [M+Na]<sup>+</sup> calcd for C<sub>25</sub>H<sub>19</sub>FO<sub>4</sub>Na: 425.1160, found: 425.1165;

[α]<sub>D</sub><sup>21</sup> = +444.7 (*c* = 0.60 in CHCl<sub>3</sub>);

**IR** (neat) 3466, 3027, 2341, 1740, 1706, 1603, 1509, 1358, 1288, 1243, 1164, 1080, 970, 840, 727, 693, 559 cm<sup>-1</sup>.

HPLC spectrum of **C34**

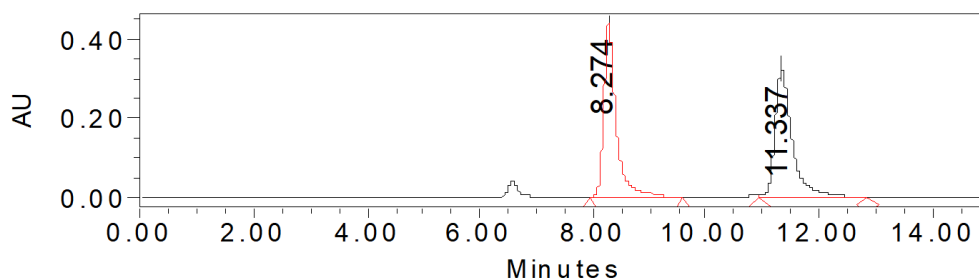

|   | Retention Time | Area    | % Area |
|---|----------------|---------|--------|
| 1 | 8.274          | 6837263 | 50.14  |
| 2 | 11.337         | 6799990 | 49.86  |

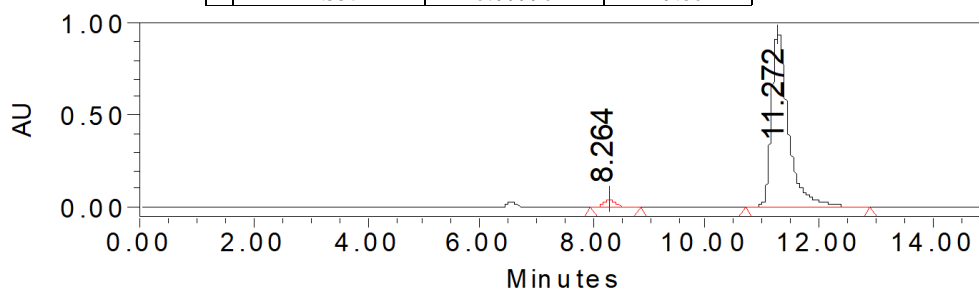

|   | Retention Time | Area     | % Area |
|---|----------------|----------|--------|
| 1 | 8.264          | 606208   | 2.94   |
| 2 | 11.272         | 19991680 | 97.06  |

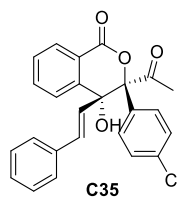

**(3S,4R)-3-acetyl-3-(4-chlorophenyl)-4-hydroxy-4-((E)-styryl)isochroman-1-one**

The residue was purified by column chromatography on silica gel (PE/CH<sub>2</sub>Cl<sub>2</sub> = 1/1) to afford the desired product **C35**; 0.1 mmol scale reaction; 37.3 mg, white solid, 89% yield, 92% ee; determined by HPLC analysis [Daicel chiralpak IA, *n*-hexane/*i*-PrOH = 90/10, 1.0 mL/min,  $\lambda$  = 254 nm,  $t_1$  = 7.81 min,  $t_2$  = 13.00 min];

<sup>1</sup>H NMR (400 MHz, CDCl<sub>3</sub>)  $\delta$  8.12 (d,  $J$  = 7.6 Hz, 1H), 7.80 (d,  $J$  = 7.6 Hz, 1H), 7.73 (td,  $J$  = 7.6, 1.2 Hz, 1H), 7.66 – 7.62 (m, 2H), 7.50 (td,  $J$  = 7.6, 1.2 Hz, 1H), 7.42 – 7.39 (m, 2H), 7.23 – 7.16 (m, 3H), 7.11 – 7.09 (m, 2H), 6.14 (d,  $J$  = 16.0 Hz, 1H), 5.96 (d,  $J$  = 16.0 Hz, 1H), 5.20 (s, 1H), 2.13 (s, 3H);

<sup>13</sup>C{<sup>1</sup>H} NMR (101 MHz, CDCl<sub>3</sub>)  $\delta$  211.0, 162.7, 146.1, 135.9, 135.7, 135.5, 132.4, 130.3, 130.0, 128.7, 128.6, 128.5, 128.1, 128.0, 127.2, 126.7, 125.1, 121.8, 90.1, 76.8, 27.4 ppm;

**m.p.** 71.9 – 74.7 °C;

**HRMS** (ESI)  $m/z$  [M+Na]<sup>+</sup> calcd for C<sub>25</sub>H<sub>19</sub><sup>34.9689</sup>ClO<sub>4</sub>Na: 441.0864, found: 441.0862;

**HRMS** (ESI)  $m/z$  [M+Na]<sup>+</sup> calcd for C<sub>25</sub>H<sub>19</sub><sup>36.9659</sup>ClO<sub>4</sub>Na: 443.0835, found: 443.0833;

$[\alpha]_D^{20}$  = +411.7 ( $c$  = 1.12 in CHCl<sub>3</sub>);

**IR** (neat): 3466, 3026, 1739, 1706, 1600, 1492, 1454, 1357, 1287, 1247, 1210, 1080, 1013, 969, 804, 750, 693, 591, 557 cm<sup>-1</sup>.

HPLC spectrum of **C35**

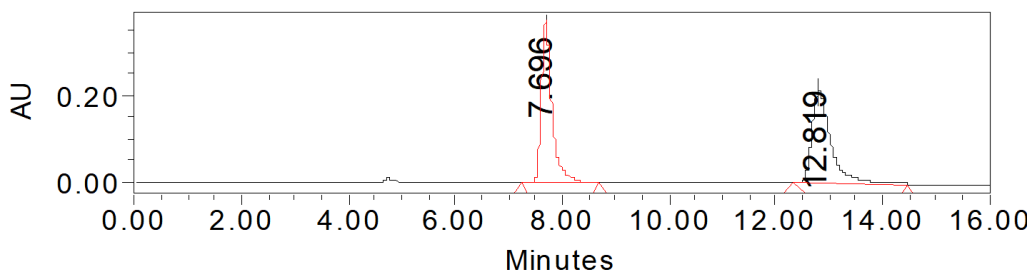

|   | Retention Time | Area    | % Area |
|---|----------------|---------|--------|
| 1 | 7.696          | 5295053 | 50.06  |
| 2 | 12.819         | 5281477 | 49.94  |

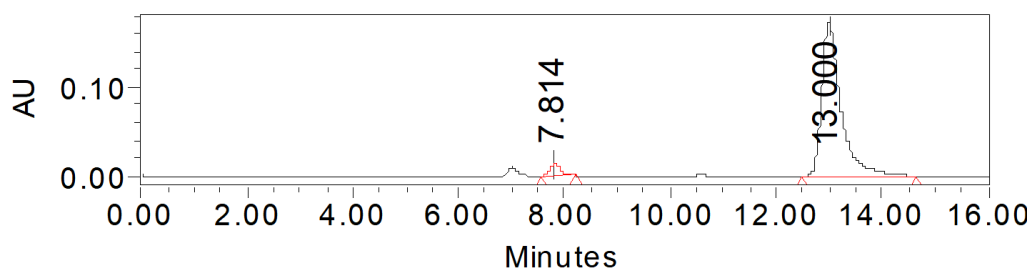

|   | Retention Time | Area    | % Area |
|---|----------------|---------|--------|
| 1 | 7.814          | 173841  | 3.82   |
| 2 | 13.000         | 4377555 | 96.18  |

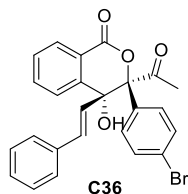

**(3S,4R)-3-acetyl-3-(4-bromophenyl)-4-hydroxy-4-((E)-styryl)isochroman-1-one**

The residue was purified by column chromatography on silica gel (PE/CH<sub>2</sub>Cl<sub>2</sub> = 1/1) to afford the desired product **C36**; 0.1 mmol scale reaction; 42.5 mg, white solid, 92% yield, 95% ee; determined by HPLC analysis [Daicel chiralpak IA, *n*-hexane/*i*-PrOH = 90/10, 1.0 mL/min,  $\lambda$  = 254 nm,  $t_1$  = 8.64 min,  $t_2$  = 14.68 min];

<sup>1</sup>H NMR (400 MHz, CDCl<sub>3</sub>)  $\delta$  8.12 (dd,  $J$  = 7.6, 0.8 Hz, 1H), 7.81 – 7.79 (m, 1H), 7.73 (td,  $J$  = 7.6, 1.2 Hz, 1H), 7.60 – 7.54 (m, 4H), 7.51 – 7.47 (m, 1H), 7.23 – 7.15 (m, 3H), 7.11 – 7.08 (m, 2H), 6.15 (d,  $J$  = 16.0 Hz, 1H), 5.97 (dd,  $J$  = 16.0, 1.2 Hz, 1H), 5.19 (d,  $J$  = 1.2 Hz, 1H), 2.13 (s, 3H); <sup>13</sup>C{<sup>1</sup>H} NMR (101 MHz, CDCl<sub>3</sub>)  $\delta$  210.8, 162.7, 146.0, 135.9, 135.7, 132.4, 131.5, 130.5, 130.3, 128.7, 128.4, 128.3, 128.1, 127.2, 126.6, 125.0, 123.8, 121.8, 90.1, 76.8, 27.4 ppm;

**m.p.** 75.0 – 76.2 °C;

**HRMS** (ESI)  $m/z$  [M+Na]<sup>+</sup> calcd for C<sub>25</sub>H<sub>19</sub><sup>78.9183</sup>BrO<sub>4</sub>Na: 485.0359, found: 485.0367;

**HRMS** (ESI)  $m/z$  [M+Na]<sup>+</sup> calcd for C<sub>25</sub>H<sub>19</sub><sup>80.9163</sup>BrO<sub>4</sub>Na: 487.0338, found: 487.0348;

$[\alpha]_D^{21}$  = +458.8 ( $c$  = 1.12 in CHCl<sub>3</sub>);

**IR** (neat): 3465, 3026, 2360, 1739, 1706, 1602, 1489, 1454, 1358, 1287, 1247, 1211, 1076, 1009, 969, 751, 694, 591, 556 cm<sup>-1</sup>.

HPLC spectrum of **C36**

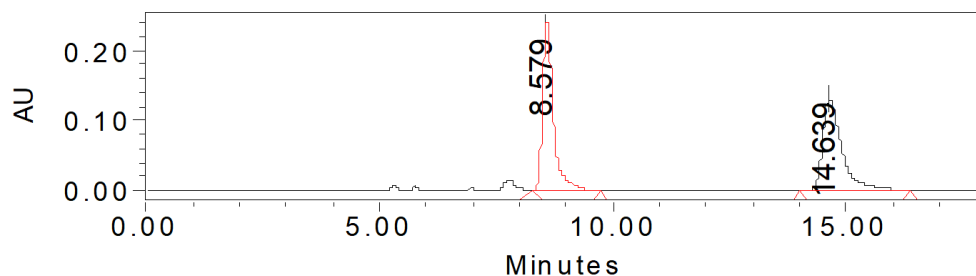

|   | Retention Time | Area    | % Area |
|---|----------------|---------|--------|
| 1 | 8.579          | 3803496 | 50.29  |
| 2 | 14.639         | 3760034 | 49.71  |

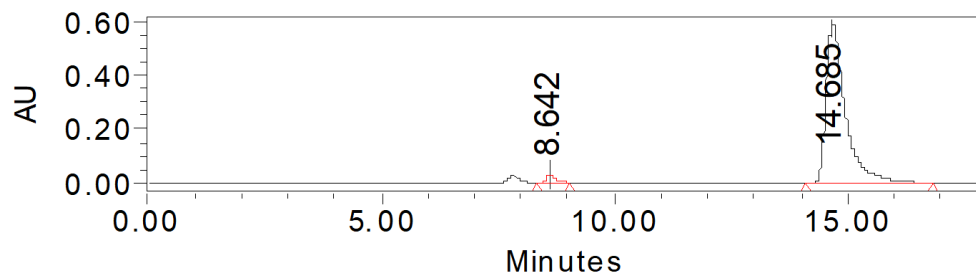

|   | Retention Time | Area     | % Area |
|---|----------------|----------|--------|
| 1 | 8.642          | 410260   | 2.34   |
| 2 | 14.685         | 17143417 | 97.66  |



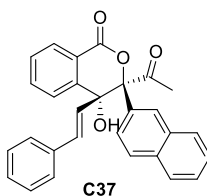

**(3S,4R)-3-acetyl-4-hydroxy-3-(naphthalen-2-yl)-4-((E)-styryl)isochroman-1-one**

The residue was purified by column chromatography on silica gel (PE/CH<sub>2</sub>Cl<sub>2</sub> = 1.5/1) to afford the desired product **C37**; 0.1 mmol scale reaction; 38.6 mg, white solid, 89% yield, 94% ee; determined by HPLC analysis [Daicel chiralpak IC, *n*-hexane/*i*-PrOH = 90/10, 1.0 mL/min, λ = 254 nm, t<sub>1</sub> = 5.74 min, t<sub>2</sub> = 6.59 min];

<sup>1</sup>H NMR (400 MHz, CDCl<sub>3</sub>) δ 8.19 (d, *J* = 2.0 Hz, 1H), 8.16 (dd, *J* = 8.0, 1.2 Hz, 1H), 7.93 – 7.90 (m, 2H), 7.88 – 7.81 (m, 3H), 7.76 (td, *J* = 7.6, 1.2 Hz, 1H), 7.57 – 7.50 (m, 3H), 7.17 – 7.10 (m, 3H), 7.05 – 7.03 (m, 2H), 6.11 (d, *J* = 16.0 Hz, 1H), 6.03 (d, *J* = 16.0 Hz, 1H), 5.35 (s, 1H), 2.16 (s, 3H);

<sup>13</sup>C{<sup>1</sup>H} NMR (101 MHz, CDCl<sub>3</sub>) δ 211.1, 163.1, 146.3, 135.9, 135.8, 133.3, 132.7, 132.3, 130.3, 128.8, 128.7, 128.3, 128.1, 127.9, 127.8, 127.5, 127.0, 126.6, 126.6, 126.5, 125.2, 123.7, 122.1, 90.7, 77.1, 27.5 ppm;

**m.p.** 85.9 – 89.9 °C;

**HRMS** (ESI) *m/z* [M+Na]<sup>+</sup> calcd for C<sub>29</sub>H<sub>22</sub>O<sub>4</sub>Na: 457.1410, found: 457.1406;

[α]<sub>D</sub><sup>21</sup> = +510.6 (*c* = 0.66 in CHCl<sub>3</sub>);

**IR** (neat): 3464, 3060, 3024, 2361, 1738, 1705, 1601, 1454, 1357, 1285, 1247, 1217, 1079, 969, 814, 768, 748, 693, 558, 477 cm<sup>-1</sup>.

HPLC spectrum of **C37**

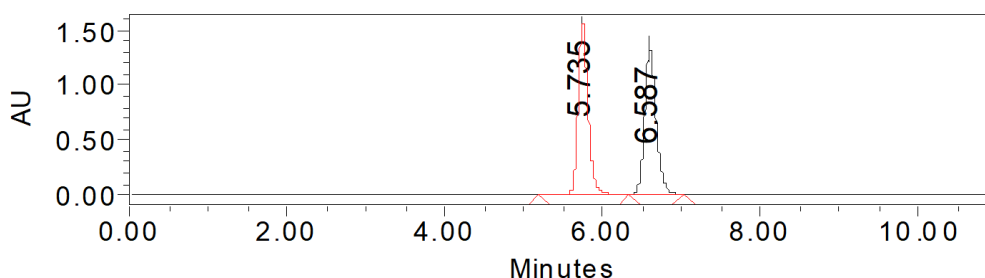

|   | Retention Time | Area     | % Area |
|---|----------------|----------|--------|
| 1 | 5.735          | 14129712 | 50.29  |
| 2 | 6.587          | 13967910 | 49.71  |

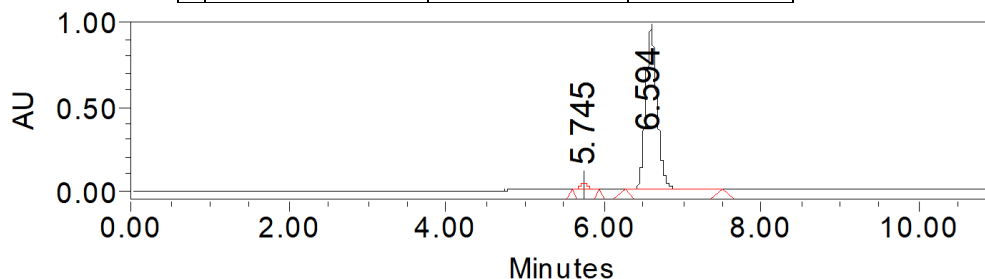

|   | Retention Time | Area    | % Area |
|---|----------------|---------|--------|
| 1 | 5.745          | 289571  | 2.83   |
| 2 | 6.594          | 9956580 | 97.17  |

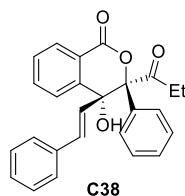

**(3S,4R)-4-hydroxy-3-phenyl-3-propionyl-4-((E)-styryl)isochroman-1-one**

The residue was purified by column chromatography on silica gel (PE/CH<sub>2</sub>Cl<sub>2</sub> = 1.5/1) to afford the desired product **C38**; 0.1 mmol scale reaction; 37.4 mg, colorless oil, 94% yield, 89% ee; determined by HPLC analysis [Daicel chiralpak IA, *n*-hexane/*i*-PrOH = 90/10, 1.0 mL/min, λ = 254 nm, t<sub>1</sub> = 8.56 min, t<sub>2</sub> = 10.11 min];

<sup>1</sup>H NMR (400 MHz, CDCl<sub>3</sub>) δ 8.11 (d, *J* = 7.6 Hz, 1H), 7.82 (d, *J* = 7.6 Hz, 1H), 7.73 (t, *J* = 7.6 Hz, 1H), 7.66 – 7.64 (m, 2H), 7.49 (t, *J* = 7.6 Hz, 1H), 7.44 – 7.37 (m, 3H), 7.21 – 7.13 (m, 3H), 7.09 – 7.07 (m, 2H), 6.09 (d, *J* = 16.0 Hz, 1H), 5.98 (d, *J* = 16.0 Hz, 1H), 5.38 (s, 1H), 2.64 – 2.54 (m, 1H), 2.46 – 2.36 (m, 1H), 0.85 (t, *J* = 7.2 Hz, 3H);

<sup>13</sup>C{<sup>1</sup>H} NMR (101 MHz, CDCl<sub>3</sub>) δ 214.1, 163.2, 146.3, 136.0, 135.7, 132.1, 131.7, 130.2, 129.1, 128.6, 128.4, 128.3, 127.9, 127.8, 126.6, 126.5, 125.2, 122.1, 90.7, 76.8, 32.9, 7.6 ppm;

**HRMS** (ESI) *m/z* [M+Na]<sup>+</sup> calcd for C<sub>26</sub>H<sub>22</sub>O<sub>4</sub>Na: 421.1410, found: 421.1416;

[α]<sub>D</sub><sup>21</sup> = +474.4 (*c* = 0.36 in CHCl<sub>3</sub>);

**IR** (neat): 3463, 2925, 1739, 1705, 1602, 1452, 1287, 1248, 1081, 1044, 969, 750, 707, 694  $\text{cm}^{-1}$ .

HPLC spectrum of **C38**

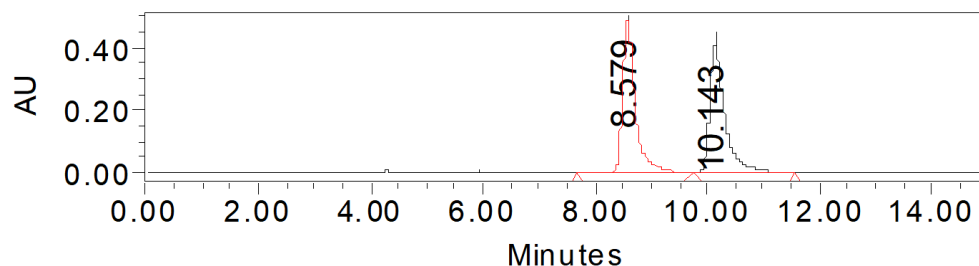

|   | Retention Time | Area    | % Area |
|---|----------------|---------|--------|
| 1 | 8.579          | 7730654 | 50.05  |
| 2 | 10.143         | 7716495 | 49.95  |

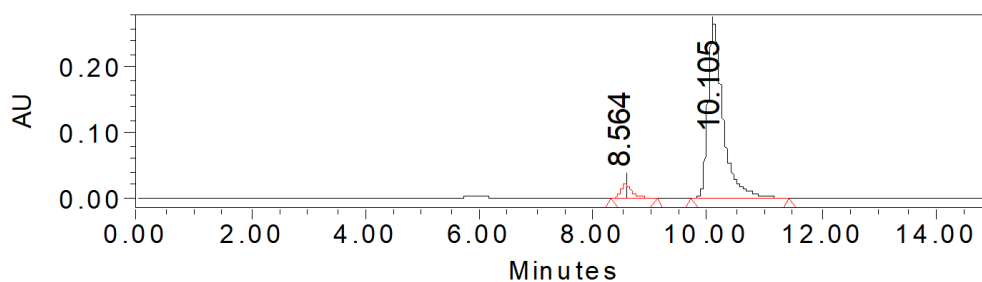

|   | Retention Time | Area    | % Area |
|---|----------------|---------|--------|
| 1 | 8.564          | 286227  | 5.40   |
| 2 | 10.105         | 5012049 | 94.60  |

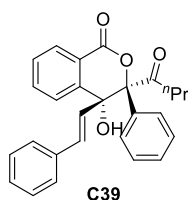

**(3*S*,4*R*)-3-butyl-4-hydroxy-3-phenyl-4-((*E*)-styryl)isochroman-1-one**

The residue was purified by column chromatography on silica gel (PE/ $\text{CH}_2\text{Cl}_2$  = 1.5/1) to afford the desired product **C39**; 0.1 mmol scale reaction; 37.9 mg, colorless oil, 92% yield, 87% ee; determined by HPLC analysis [Daicel chiralpak IA, *n*-hexane/*i*-PrOH = 90/10, 1.0 mL/min,  $\lambda$  = 254 nm,  $t_1$  = 6.15 min,  $t_2$  = 7.90 min];

**$^1\text{H}$  NMR** (400 MHz,  $\text{CDCl}_3$ )  $\delta$  8.12 (dd,  $J$  = 7.6, 1.2 Hz, 1H), 7.82 (dd,  $J$  = 7.6, 1.2 Hz, 1H), 7.75 – 7.70 (m, 1H), 7.68 – 7.65 (m, 2H), 7.49 (td,  $J$  = 7.6, 1.2 Hz, 1H), 7.45 – 7.37 (m, 3H), 7.21 – 7.13 (m, 3H), 7.10 – 7.06 (m, 2H), 6.10 (d,  $J$  = 16.0 Hz, 1H), 5.99 (d,  $J$  = 15.6 Hz, 1H), 5.39 (s, 1H), 2.56 – 2.47 (m, 1H), 2.43 – 2.35 (m, 1H), 1.45 – 1.31 (m, 2H), 0.65 (t,  $J$  = 7.2 Hz, 3H);

**$^{13}\text{C}\{^1\text{H}\}$  NMR** (101 MHz,  $\text{CDCl}_3$ )  $\delta$  213.4, 163.2, 146.4, 136.0, 135.8, 132.2, 131.5, 130.2, 129.1, 128.6, 128.4, 128.3, 128.0, 127.9, 126.7, 126.6, 125.2, 122.2, 90.6, 76.9, 41.2, 16.7, 13.2 ppm;

**HRMS** (ESI)  $m/z$   $[\text{M}+\text{Na}]^+$  calcd for  $\text{C}_{27}\text{H}_{24}\text{O}_4\text{Na}$ : 435.1567, found: 435.1563;

$[\alpha]_D^{20}$  = +414.1 ( $c$  = 1.34 in  $\text{CHCl}_3$ );

**IR** (neat): 3463, 2966, 1738, 1703, 1603, 1495, 1452, 1362, 1286, 1247, 1081, 1049, 969, 749, 695, 560  $\text{cm}^{-1}$ .

HPLC spectrum of **C39**

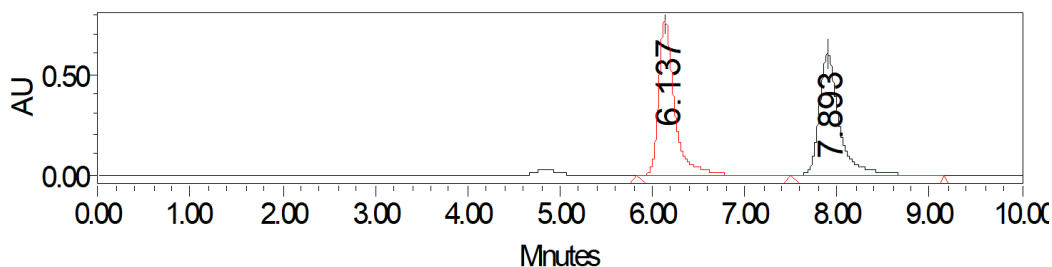

|   | Retention Time | Area    | % Area |
|---|----------------|---------|--------|
| 1 | 6.137          | 9112916 | 50.10  |
| 2 | 7.893          | 9075824 | 49.90  |

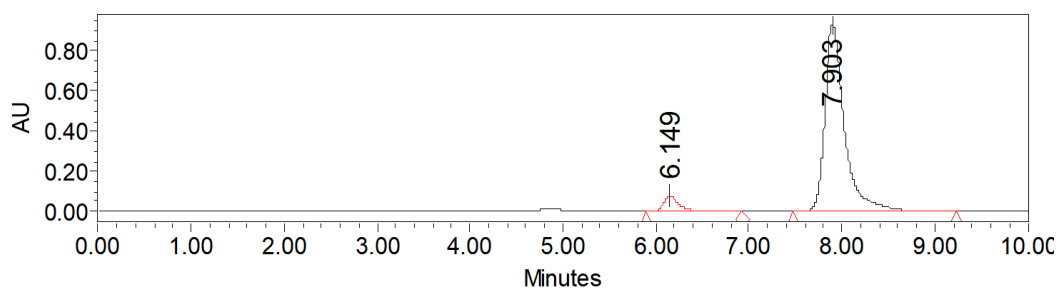

|   | Retention Time | Area     | % Area |
|---|----------------|----------|--------|
| 1 | 6.149          | 953327   | 6.35   |
| 2 | 7.903          | 14051612 | 93.65  |

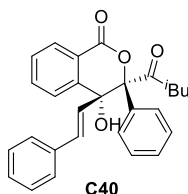

**(3S,4R)-4-hydroxy-3-(3-methylbutanoyl)-3-phenyl-4-((E)-styryl)isochroman-1-one**

The residue was purified by column chromatography on silica gel (PE/CH<sub>2</sub>Cl<sub>2</sub> = 1.5/1) to afford the desired product **C40**; 0.1 mmol scale reaction; 42.2 mg, colorless oil, 99% yield, 82% ee; determined by HPLC analysis [Daicel chiralpak IA, *n*-hexane/*i*-PrOH = 90/10, 1.0 mL/min,  $\lambda$  = 254 nm,  $t_1$  = 6.60 min,  $t_2$  = 8.98 min];

<sup>1</sup>H NMR (400 MHz, CDCl<sub>3</sub>)  $\delta$  8.12 (dd,  $J$  = 8.0, 1.2 Hz, 1H), 7.83 (dd,  $J$  = 7.6, 1.2 Hz, 1H), 7.75 – 7.67 (m, 3H), 7.49 (td,  $J$  = 7.6, 1.2 Hz, 1H), 7.45 – 7.38 (m, 3H), 7.21 – 7.13 (m, 3H), 7.09 – 7.06 (m, 2H), 6.11 (d,  $J$  = 15.6 Hz, 1H), 5.99 (d,  $J$  = 16.0 Hz, 1H), 5.41 (s, 1H), 2.42 – 2.30 (m, 2H), 2.01 – 1.91 (m, 1H), 0.66 (d,  $J$  = 6.8 Hz, 3H), 0.61 (d,  $J$  = 6.4 Hz, 3H);

<sup>13</sup>C{<sup>1</sup>H} NMR (101 MHz, CDCl<sub>3</sub>)  $\delta$  212.8, 163.1, 146.3, 135.9, 135.7, 132.1, 131.3, 130.1, 129.1, 128.5, 128.4, 128.3, 128.2, 127.9, 127.8, 126.6, 125.1, 122.2, 90.4, 76.8, 47.8, 23.4, 22.2, 21.6 ppm;

HRMS (ESI)  $m/z$  [M+Na]<sup>+</sup> calcd for C<sub>28</sub>H<sub>26</sub>O<sub>4</sub>Na: 449.1723, found: 449.1724;

[ $\alpha$ ]<sub>D</sub><sup>21</sup> = +352.3 ( $c$  = 1.10 in CHCl<sub>3</sub>);

IR (neat): 3464, 3062, 2960, 2360, 1739, 1702, 1602, 1495, 1452, 1364, 1287, 1247, 1159, 1081, 1050, 1035, 969, 748, 700, 560 cm<sup>-1</sup>.

HPLC spectrum of **C40**

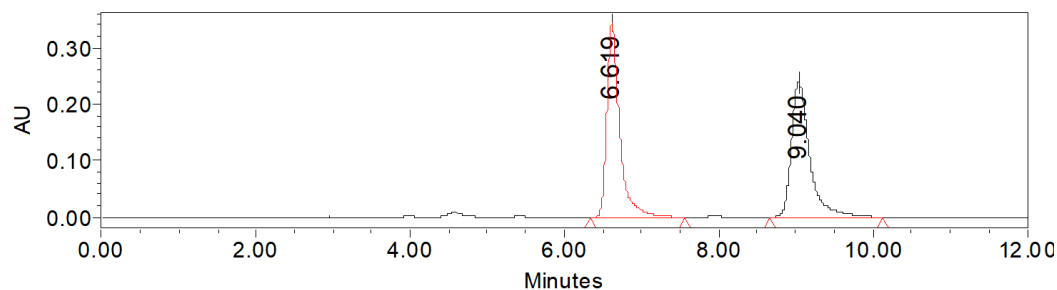

|   | Retention Time | Area    | % Area |
|---|----------------|---------|--------|
| 1 | 6.619          | 3892206 | 50.08  |
| 2 | 9.040          | 3879362 | 49.92  |

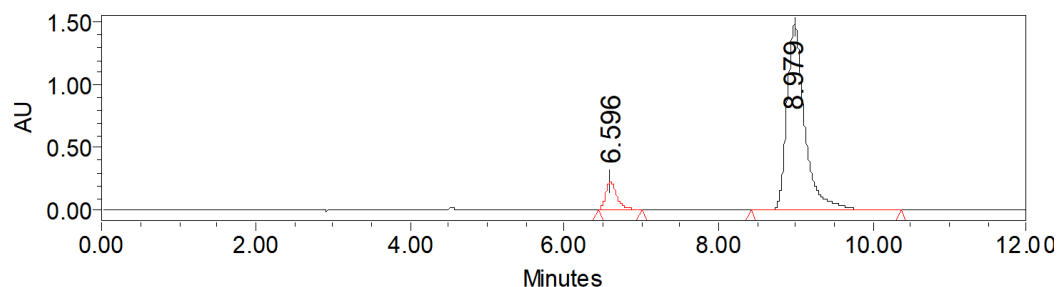

|   | Retention Time | Area     | % Area |
|---|----------------|----------|--------|
| 1 | 6.596          | 2397820  | 9.00   |
| 2 | 8.979          | 24256870 | 91.00  |

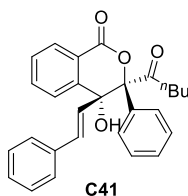

**(3*S*,4*R*)-4-hydroxy-3-pentanoyl-3-phenyl-4-((*E*)-styryl)isochroman-1-one**

The residue was purified by column chromatography on silica gel (PE/CH<sub>2</sub>Cl<sub>2</sub> = 1.5/1) to afford the desired product **C41**; 0.1 mmol scale reaction; 42.2 mg, colorless oil, 99% yield, 85% ee; determined by HPLC analysis [Daicel chiralpak IA, *n*-hexane/*i*-PrOH = 90/10, 1.0 mL/min, λ = 254 nm, t<sub>1</sub> = 7.01 min, t<sub>2</sub> = 8.94 min];

<sup>1</sup>H NMR (400 MHz, CDCl<sub>3</sub>) δ 8.12 (dd, *J* = 7.6, 1.2 Hz, 1H), 7.84 – 7.82 (m, 1H), 7.73 (td, *J* = 7.6, 1.2 Hz, 1H), 7.69 – 7.66 (m, 2H), 7.49 (td, *J* = 7.6, 1.2 Hz, 1H), 7.45 – 7.39 (m, 3H), 7.21 – 7.13 (m, 3H), 7.10 – 7.06 (m, 2H), 6.11 (d, *J* = 16.0 Hz, 1H), 6.00 (d, *J* = 15.6 Hz, 1H), 5.40 (s, 1H), 2.59 – 2.51 (m, 1H), 2.44 – 2.36 (m, 1H), 1.45 – 1.24 (m, 2H), 1.12 – 0.89 (m, 3H), 0.71 (t, *J* = 7.6 Hz, 3H);

<sup>13</sup>C{<sup>1</sup>H} NMR (101 MHz, CDCl<sub>3</sub>) δ 213.5, 163.1, 146.3, 136.0, 135.7, 132.1, 131.5, 130.1, 129.1, 128.5, 128.3, 128.2, 127.9, 127.8, 126.6, 126.5, 125.1, 122.1, 90.6, 76.8, 39.0, 25.2, 21.6, 13.5 ppm;

HRMS (ESI) *m/z* [M+Na]<sup>+</sup> calcd for C<sub>28</sub>H<sub>26</sub>O<sub>4</sub>Na: 449.1723, found: 449.1720;

[α]<sub>D</sub><sup>20</sup> = +405.7 (*c* = 1.36 in CHCl<sub>3</sub>);

IR (neat): 3463, 3062, 2959, 2960, 2932, 1738, 1703, 1602, 1495, 1451, 1373, 1286, 1247, 1081, 1050, 969, 770, 749, 694, 560 cm<sup>-1</sup>.

HPLC spectrum of **C41**

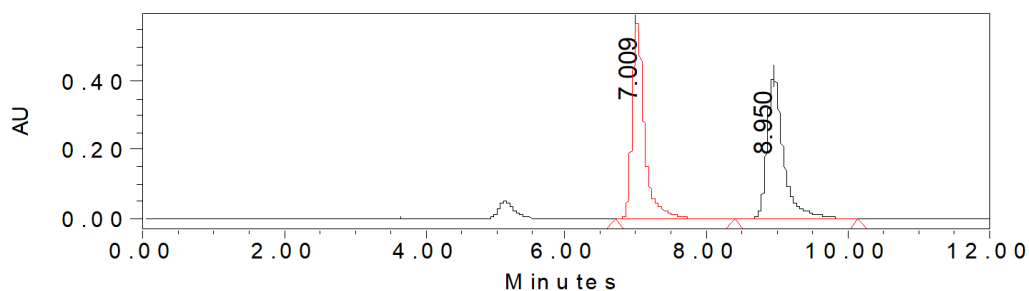

|   | Retention Time | Area    | % Area |
|---|----------------|---------|--------|
| 1 | 7.009          | 6787094 | 50.12  |
| 2 | 8.950          | 6754122 | 49.88  |

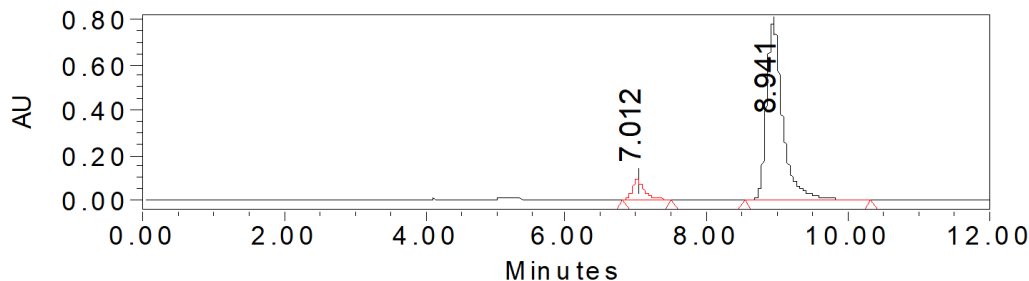

|   | Retention Time | Area     | % Area |
|---|----------------|----------|--------|
| 1 | 7.012          | 1039951  | 7.57   |
| 2 | 8.941          | 12702235 | 92.43  |

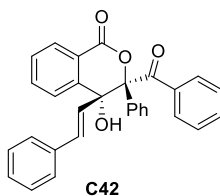

**(3*S*,4*R*)-3-benzoyl-4-hydroxy-3-phenyl-4-((*E*)-styryl)isochroman-1-one**

The residue was purified by column chromatography on silica gel (PE/CH<sub>2</sub>Cl<sub>2</sub> = 1.5/1) to afford the desired product **C42**; 0.1 mmol scale reaction; 44.2 mg, white solid, 99% yield, 87% ee; determined by HPLC analysis [Daicel chiralpak IA, *n*-hexane/*i*-PrOH = 85/15, 1.0 mL/min, λ = 254 nm, t<sub>1</sub> = 7.30 min, t<sub>2</sub> = 11.52 min];

<sup>1</sup>H NMR (400 MHz, CDCl<sub>3</sub>) δ 7.89 – 7.84 (m, 2H), 7.73 – 7.66 (m, 5H), 7.46 – 7.37 (m, 5H), 7.28 – 7.16 (m, 5H), 7.15 – 7.11 (m, 2H), 6.16 – 6.08 (m, 2H), 5.53 (s, 1H);

<sup>13</sup>C{<sup>1</sup>H} NMR (101 MHz, CDCl<sub>3</sub>) δ 202.2, 162.9, 146.6, 136.1, 135.5, 134.0, 134.0, 132.7, 132.4, 130.7, 130.0, 129.1, 128.4, 128.3, 128.3, 128.3, 127.9, 127.7, 126.6, 126.4, 125.0, 122.3, 90.8, 77.6 ppm;

m.p. 87.2 – 88.9 °C;

HRMS (ESI) *m/z* [M+Na]<sup>+</sup> calcd for C<sub>30</sub>H<sub>22</sub>O<sub>4</sub>Na: 469.1410, found: 469.1413;

[α]<sub>D</sub><sup>21</sup> = +504.2 (*c* = 0.81 in CHCl<sub>3</sub>);

IR (neat): 3465, 3062, 3027, 2361, 1741, 1665, 1599, 1450, 1370, 1286, 1245, 1076, 772, 709, 691 cm<sup>-1</sup>.

HPLC spectrum of **C42**

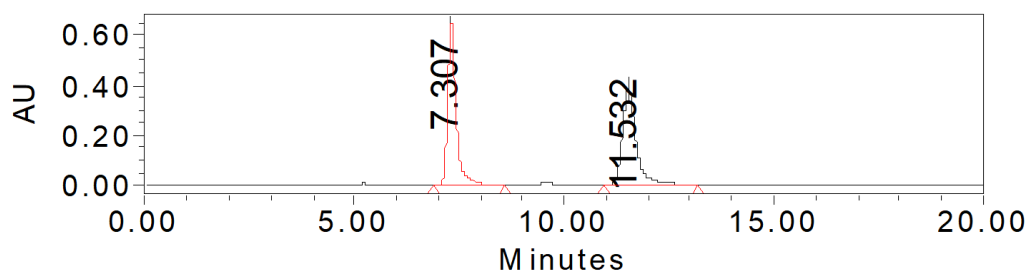

|   | Retention Time | Area    | % Area |
|---|----------------|---------|--------|
| 1 | 7.307          | 8882979 | 50.13  |
| 2 | 11.532         | 8836635 | 49.87  |

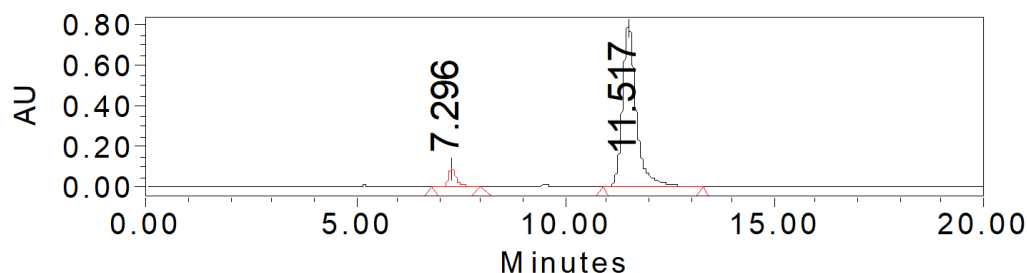

|   | Retention Time | Area     | % Area |
|---|----------------|----------|--------|
| 1 | 7.296          | 1294355  | 6.53   |
| 2 | 11.517         | 18539573 | 93.47  |

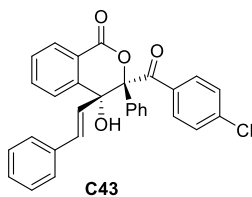

**(3*S*,4*R*)-3-(4-chlorobenzoyl)-4-hydroxy-3-phenyl-4-((*E*)-styryl)isochroman-1-one**

The residue was purified by column chromatography on silica gel (PE/CH<sub>2</sub>Cl<sub>2</sub> = 1.5/1) to afford the desired product **C43**; 0.1 mmol scale reaction; 47.6 mg, white solid, 99% yield, 72% ee; determined by HPLC analysis [Daicel chiralpak IA, *n*-hexane/*i*-PrOH = 85/15, 1.0 mL/min, λ = 254 nm, t<sub>1</sub> = 7.75 min, t<sub>2</sub> = 16.88 min];

<sup>1</sup>H NMR (400 MHz, CDCl<sub>3</sub>) δ 7.90 (d, *J* = 7.6 Hz, 1H), 7.84 (d, *J* = 7.6 Hz, 1H), 7.73 – 7.65 (m, 5H), 7.44 – 7.37 (m, 4H), 7.24 – 7.11 (m, 7H), 6.15 – 6.06 (m, 2H), 5.40 (s, 1H);

<sup>13</sup>C{<sup>1</sup>H} NMR (101 MHz, CDCl<sub>3</sub>) δ 200.6, 162.7, 146.6, 140.7, 136.0, 135.6, 132.5, 132.5, 132.2, 132.1, 130.1, 129.2, 128.8, 128.4, 128.4, 128.0, 127.9, 127.6, 126.6, 126.4, 125.0, 122.2, 90.8, 77.5 ppm;

m.p. 200.8 – 205.6 °C;

HRMS (ESI) *m/z* [M+Na]<sup>+</sup> calcd for C<sub>30</sub>H<sub>21</sub><sup>34.9689</sup>ClO<sub>4</sub>Na: 503.1021, found: 503.1020;

HRMS (ESI) *m/z* [M+Na]<sup>+</sup> calcd for C<sub>30</sub>H<sub>21</sub><sup>36.9659</sup>ClO<sub>4</sub>Na: 505.0991, found: 505.0995;

[α]<sub>D</sub><sup>20</sup> = +385.4 (*c* = 1.57 in CHCl<sub>3</sub>);

IR (neat): 3469, 3063, 3027, 2361, 1740, 1667, 1585, 1492, 1451, 1366, 1285, 1244, 1077, 844, 752, 669, 587 cm<sup>-1</sup>.

HPLC spectrum of **C43**

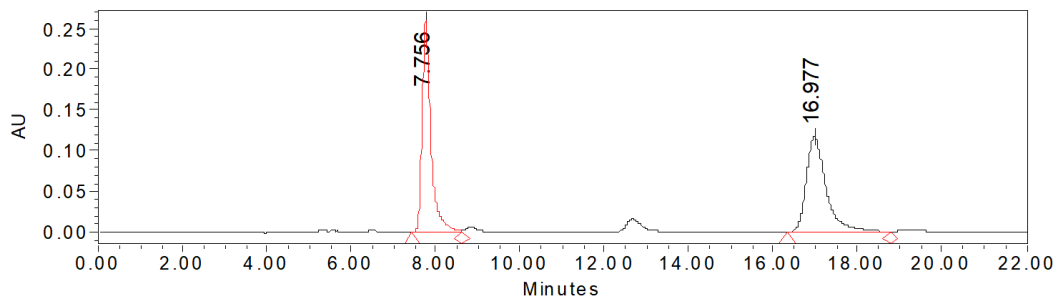

|   | Retention Time | Area    | % Area |
|---|----------------|---------|--------|
| 1 | 7.756          | 3805376 | 50.16  |
| 2 | 16.977         | 3781716 | 49.84  |

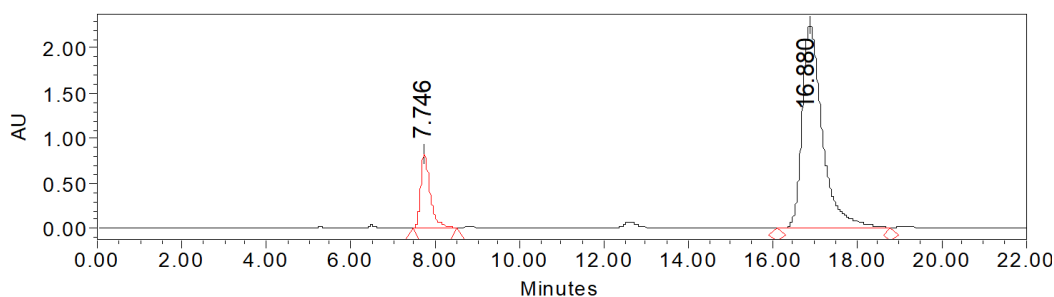

|   | Retention Time | Area     | % Area |
|---|----------------|----------|--------|
| 1 | 7.746          | 12319879 | 13.72  |
| 2 | 16.880         | 77448401 | 86.28  |

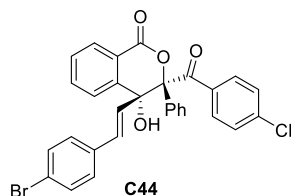

**(3S,4R)-4-((E)-4-bromostyryl)-3-(4-chlorobenzoyl)-4-hydroxy-3-phenylisochroman-1-one**

The residue was purified by column chromatography on silica gel (PE/EtOAc = 15/1) to afford the desired product **C44**; 0.1 mmol scale reaction; 42.0 mg, white solid, 75% yield, 84% ee; determined by HPLC analysis [Daicel chiralpak IA, *n*-hexane/*i*-PrOH = 80/20, 1.0 mL/min,  $\lambda$  = 254 nm,  $t_1$  = 7.13 min,  $t_2$  = 14.83 min];

$^1\text{H}$  NMR (400 MHz,  $\text{CDCl}_3$ )  $\delta$  7.90 (d,  $J$  = 7.6 Hz, 1H), 7.83 (d,  $J$  = 8.0 Hz, 1H), 7.73 (t,  $J$  = 7.6 Hz, 1H), 7.67 – 7.65 (m, 4H), 7.45 – 7.41 (m, 4H), 7.33 (d,  $J$  = 8.0 Hz, 2H), 7.26 – 7.24 (m, 2H), 6.98 (d,  $J$  = 8.4 Hz, 2H), 6.11 – 6.03 (m, 2H), 5.41 (s, 1H);

$^{13}\text{C}\{^1\text{H}\}$  NMR (101 MHz,  $\text{CDCl}_3$ )  $\delta$  200.5, 162.7, 146.4, 140.8, 135.7, 134.9, 132.4, 132.2, 132.0, 131.6, 131.3, 130.2, 129.3, 128.8, 128.5, 128.4, 128.3, 128.2, 126.3, 125.0, 122.1, 121.9, 90.7, 77.4 ppm;

m.p. 100.8 – 105.4 °C;

HRMS (ESI)  $m/z$   $[\text{M}+\text{Na}]^+$  calcd for  $\text{C}_{30}\text{H}_{20}^{78.9183}\text{Br}^{34.9689}\text{ClO}_4\text{Na}$ : 581.0126, found: 581.0135;

HRMS (ESI)  $m/z$   $[\text{M}+\text{Na}]^+$  calcd for  $\text{C}_{30}\text{H}_{20}^{80.9163}\text{Br}^{36.9659}\text{ClO}_4\text{Na}$ : 583.0105, found: 583.0115;

$[\alpha]_D^{20}$  = +349.7 ( $c$  = 0.93 in  $\text{CHCl}_3$ );

IR (neat): 3468, 3066, 3029, 2926, 1739, 1666, 1586, 1487, 1451, 1284, 1244, 1076, 1011, 828, 769, 757, 590  $\text{cm}^{-1}$ .

HPLC spectrum of **C44**

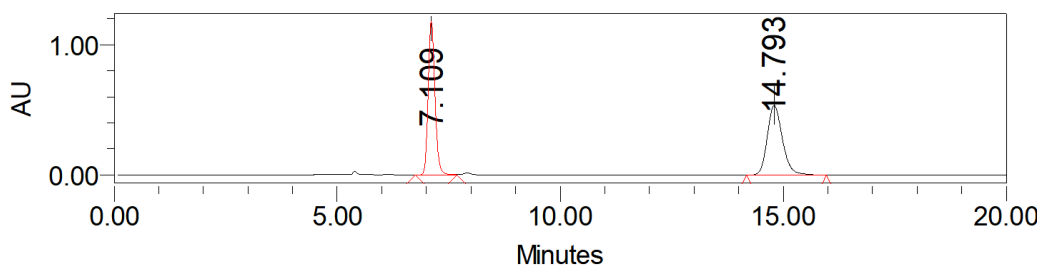

|   | Retention Time | Area     | % Area |
|---|----------------|----------|--------|
| 1 | 7.109          | 12432245 | 49.63  |
| 2 | 14.793         | 12617477 | 50.37  |

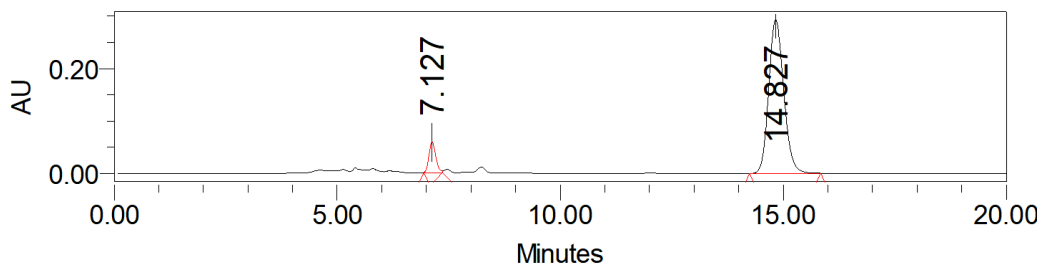

|   | Retention Time | Area    | % Area |
|---|----------------|---------|--------|
| 1 | 7.127          | 613886  | 8.22   |
| 2 | 14.827         | 6854498 | 91.78  |

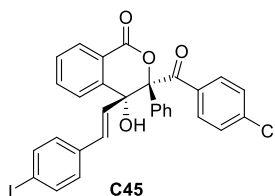

**(3*S*,4*R*)-3-(4-chlorobenzoyl)-4-hydroxy-4-((*E*)-4-iodostyryl)-3-phenylisochroman-1-one**

The residue was purified by column chromatography on silica gel (PE/EtOAc = 15/1) to afford the desired product **C45**; 0.1 mmol scale reaction; 37.6 mg, white solid, 62% yield, 86% ee; determined by HPLC analysis [Daicel chiralpak IA, *n*-hexane/*i*-PrOH = 80/20, 1.0 mL/min,  $\lambda$  = 254 nm,  $t_1$  = 7.47 min,  $t_2$  = 15.86 min];

$^1\text{H}$  NMR (400 MHz,  $\text{CDCl}_3$ )  $\delta$  7.90 (d,  $J$  = 8.0 Hz, 1H), 7.83 (d,  $J$  = 8.0 Hz, 1H), 7.73 (t,  $J$  = 7.6 Hz, 1H), 7.67 – 7.64 (m, 4H), 7.54 (d,  $J$  = 8.0 Hz, 2H), 7.45 – 7.41 (m, 4H), 7.26 – 7.24 (m, 2H), 6.85 (d,  $J$  = 8.0 Hz, 2H), 6.12 – 6.02 (m, 2H), 5.41 (s, 1H);

$^{13}\text{C}\{^1\text{H}\}$  NMR (101 MHz,  $\text{CDCl}_3$ )  $\delta$  200.5, 162.7, 146.3, 140.9, 137.5, 135.8, 135.5, 132.4, 132.2, 132.0, 131.4, 130.3, 129.3, 128.8, 128.5, 128.4, 126.3, 125.0, 122.1, 93.5, 90.7, 77.4 ppm;

**m.p.** 101.6 – 106.5 °C;

**HRMS** (ESI)  $m/z$   $[\text{M}+\text{K}]^+$  calcd for  $\text{C}_{30}\text{H}_{20}^{34.9689}\text{ClIO}_4\text{K}$ : 644.9726, found: 644.9726;

**HRMS** (ESI)  $m/z$   $[\text{M}+\text{K}]^+$  calcd for  $\text{C}_{30}\text{H}_{20}^{36.9659}\text{ClIO}_4\text{K}$ : 646.9697, found: 646.9703;

$[\alpha]_{\text{D}}^{20}$  = +280.8 ( $c$  = 0.95 in  $\text{CHCl}_3$ );

**IR** (neat): 3467, 3064, 3031, 2925, 1739, 1666, 1586, 1487, 1451, 1283, 1246, 1220, 1089, 973, 837, 771, 534  $\text{cm}^{-1}$ .

HPLC spectrum of **C45**

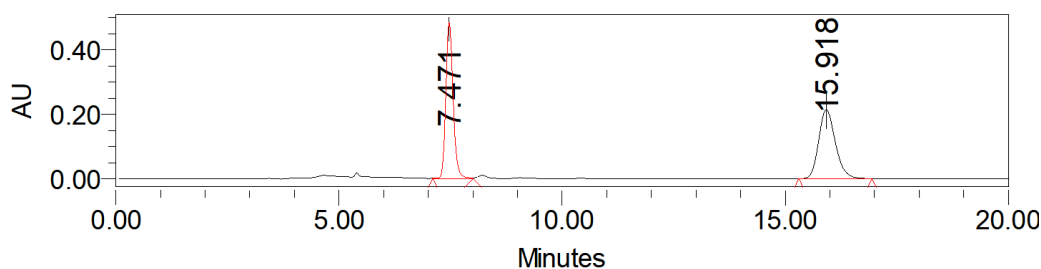

|   | Retention Time | Area    | % Area |
|---|----------------|---------|--------|
| 1 | 7.471          | 5495027 | 49.68  |
| 2 | 15.918         | 5566895 | 50.32  |

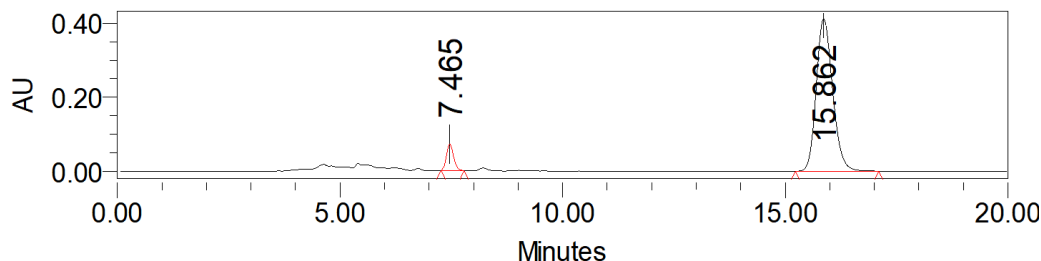

|   | Retention Time | Area     | % Area |
|---|----------------|----------|--------|
| 1 | 7.465          | 784920   | 6.94   |
| 2 | 15.862         | 10528162 | 93.06  |

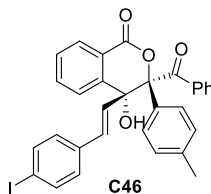

**(3*S*,4*R*)-3-benzoyl-4-hydroxy-4-((*E*)-4-iodostyryl)-3-(*p*-tolyl)isochroman-1-one**

The residue was purified by column chromatography on silica gel (PE/EtOAc = 15/1) to afford the desired product **C46**; 0.1 mmol scale reaction; 37.5 mg, white solid, 64% yield, 93% ee; determined by HPLC analysis [Daicel chiralpak IC, *n*-hexane/*i*-PrOH = 98/2, 1.0 mL/min,  $\lambda$  = 254 nm,  $t_1$  = 8.84 min,  $t_2$  = 9.90 min];

$^1\text{H}$  NMR (600 MHz,  $\text{CDCl}_3$ )  $\delta$  7.87 – 7.83 (m, 2H), 7.72 (td,  $J$  = 7.2, 1.2 Hz, 1H), 7.67 – 7.66 (m, 2H), 7.57 – 7.54 (m, 4H), 7.47 – 7.39 (m, 2H), 7.29 – 7.26 (m, 2H), 7.23 (d,  $J$  = 7.8 Hz, 2H), 6.89 – 6.88 (m, 2H), 6.14 (d,  $J$  = 15.6 Hz, 1H), 6.07 (d,  $J$  = 15.6 Hz, 1H), 5.52 (s, 1H), 2.36 (s, 3H);

$^{13}\text{C}\{^1\text{H}\}$  NMR (151 MHz,  $\text{CDCl}_3$ )  $\delta$  202.3, 163.0, 146.5, 139.1, 137.5, 135.6, 135.6, 134.0, 131.2, 130.7, 130.1, 129.6, 129.1, 128.7, 128.4, 128.4, 126.3, 125.0, 122.4, 93.4, 90.8, 77.6, 21.2 ppm;

**m.p.** 102.2 – 106.8 °C;

**HRMS** (ESI)  $m/z$   $[\text{M}+\text{Na}]^+$  calcd for  $\text{C}_{31}\text{H}_{23}\text{IO}_4\text{Na}$ : 609.0533, found: 609.0535;

$[\alpha]_{\text{D}}^{22}$  = +288.1 ( $c$  = 0.81 in  $\text{CHCl}_3$ );

**IR** (neat): 3463, 3064, 3030, 2922, 1741, 1666, 1660, 1483, 1450, 1286, 1244, 1079, 1005, 971, 769, 693, 588  $\text{cm}^{-1}$ .

HPLC spectrum of **C46**

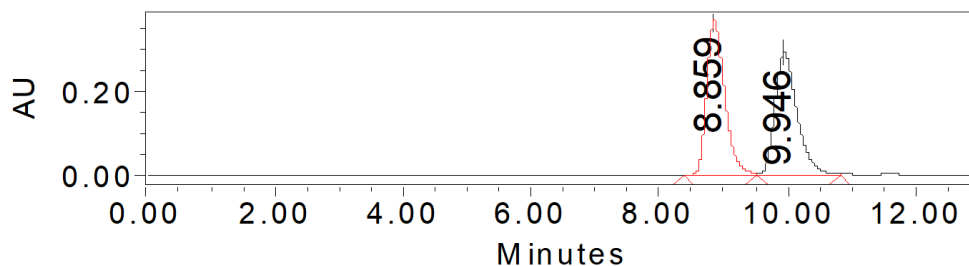

|   | Retention Time | Area    | % Area |
|---|----------------|---------|--------|
| 1 | 8.859          | 7180977 | 50.05  |
| 2 | 9.946          | 7166952 | 49.95  |

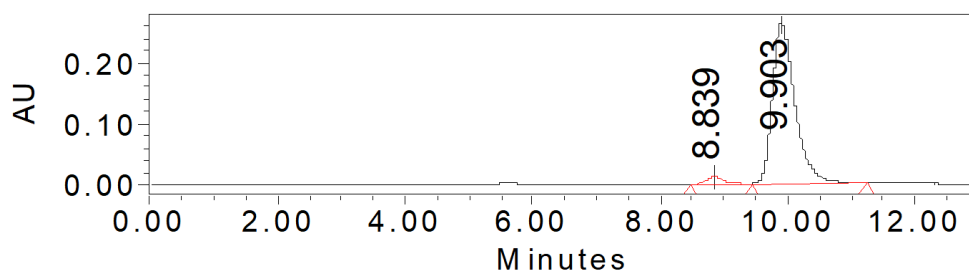

|   | Retention Time | Area    | % Area |
|---|----------------|---------|--------|
| 1 | 8.839          | 240582  | 3.56   |
| 2 | 9.903          | 6511716 | 96.44  |

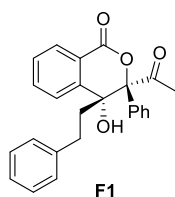

**(3S,4R)-3-acetyl-4-hydroxy-4-phenethyl-3-phenylisochroman-1-one**

The residue was purified by column chromatography on silica gel (PE/EtOAc = 5/1) to afford the desired product **F1**; 0.1 mmol scale reaction; 36.9 mg, colorless oil, 96% yield, 97% ee; determined by HPLC analysis [Daicel chiralpak IA, *n*-hexane/*i*-PrOH = 90/10, 1.0 mL/min,  $\lambda$  = 230 nm,  $t_1$  = 5.49 min,  $t_2$  = 7.40 min];

**$^1\text{H}$  NMR** (400 MHz,  $\text{CDCl}_3$ )  $\delta$  8.13 – 8.10 (m, 1H), 7.85 – 7.82 (m, 1H), 7.78 – 7.72 (m, 3H), 7.51 – 7.41 (m, 4H), 7.15 – 7.05 (m, 3H), 6.89 – 6.86 (m, 2H), 4.96 (d,  $J$  = 2.8 Hz, 1H), 2.60 (td,  $J$  = 13.2, 4.4 Hz, 1H), 2.11 – 2.03 (m, 4H), 1.96 – 1.87 (m, 1H), 1.63 (td,  $J$  = 13.6, 4.4 Hz, 1H);

**$^{13}\text{C}\{^1\text{H}\}$  NMR** (101 MHz,  $\text{CDCl}_3$ )  $\delta$  211.3, 162.9, 146.7, 141.2, 134.9, 131.2, 130.5, 129.2, 128.6, 128.5, 128.2, 126.6, 125.8, 125.8, 121.7, 91.0, 76.2, 38.1, 28.4, 27.2 ppm;

**HRMS** (ESI)  $m/z$  [ $\text{M}+\text{Na}$ ] $^+$  calcd for  $\text{C}_{25}\text{H}_{22}\text{O}_4\text{Na}$ : 409.1410, found: 409.1415;

$[\alpha]_D^{28} = +405.2$  ( $c$  = 0.71 in  $\text{CHCl}_3$ );

**IR** (neat): 3473, 3065, 3027, 2930, 1739, 1707, 1602, 1495, 1452, 1355, 1284, 1246, 1210, 1089, 1040, 756, 707, 587  $\text{cm}^{-1}$ .

HPLC spectrum of **F1**

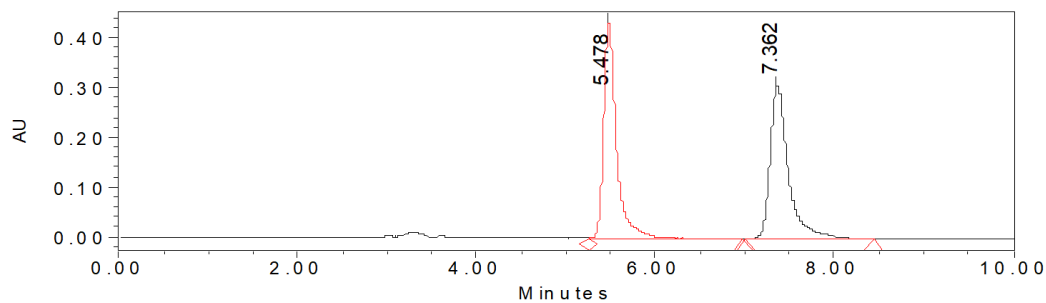

|   | Retention Time | Area    | % Area |
|---|----------------|---------|--------|
| 1 | 5.478          | 4352013 | 49.97  |
| 2 | 7.362          | 4357269 | 50.03  |



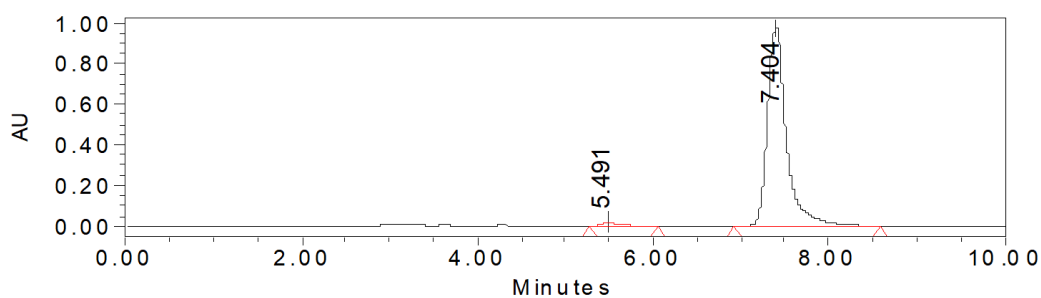

|   | Retention Time | Area     | % Area |
|---|----------------|----------|--------|
| 1 | 5.491          | 195444   | 1.30   |
| 2 | 7.404          | 14807457 | 98.70  |

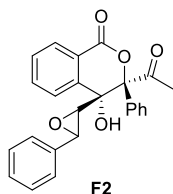

**(3S,4S)-3-acetyl-4-hydroxy-3-phenyl-4-((2S,3R)-3-phenyloxiran-2-yl)isochroman-1-one**

The residue was purified by column chromatography on silica gel (PE/EtOAc = 5/1) to afford the desired product **F2**; 0.1 mmol scale reaction; 35.2 mg, colorless oil, 88% yield, 87:13 dr, >99% ee/>99% ee; determined by HPLC analysis [Daicel chiralpak IE, *n*-hexane/*i*-PrOH = 95/5, 1.0 mL/min,  $\lambda$  = 230 nm,  $t_1$  = 25.49 min,  $t_2$  = 42.18 min];

$^1\text{H}$  NMR (400 MHz,  $\text{CDCl}_3$ )  $\delta$  8.14 – 8.12 (m, 1H), 7.86 – 7.84 (m, 1H), 7.78 (td,  $J$  = 7.6, 1.2 Hz, 1H), 7.73 – 7.69 (m, 2H), 7.54 (td,  $J$  = 7.6, 1.2 Hz, 1H), 7.46 – 7.39 (m, 3H), 7.19 – 7.14 (m, 3H), 6.73 – 6.70 (m, 2H), 4.98 (d,  $J$  = 1.2 Hz, 1H), 3.31 (d,  $J$  = 2.0 Hz, 1H), 3.00 – 2.99 (m, 1H), 2.10 (s, 3H);

$^{13}\text{C}\{^1\text{H}\}$  NMR (101 MHz,  $\text{CDCl}_3$ )  $\delta$  210.5, 162.4, 143.0, 135.6, 135.4, 131.1, 130.3, 129.3, 129.1, 128.8, 128.0, 128.0, 126.4, 125.7, 125.3, 122.4, 89.7, 74.1, 63.3, 55.5, 26.9 ppm;

HRMS (ESI)  $m/z$   $[\text{M}+\text{K}]^+$  calcd for  $\text{C}_{25}\text{H}_{20}\text{O}_5\text{K}$ : 439.0942, found: 439.0944;

$[\alpha]_D^{28}$  = +226.7 ( $c$  = 0.76 in  $\text{CHCl}_3$ );

IR (neat): 3464, 3021, 2926, 2334, 1738, 1710, 1602, 1493, 1454, 1358, 1288, 1249, 1212, 1078, 1038, 906, 752, 721, 695, 580  $\text{cm}^{-1}$ .

HPLC spectrum of **F2**

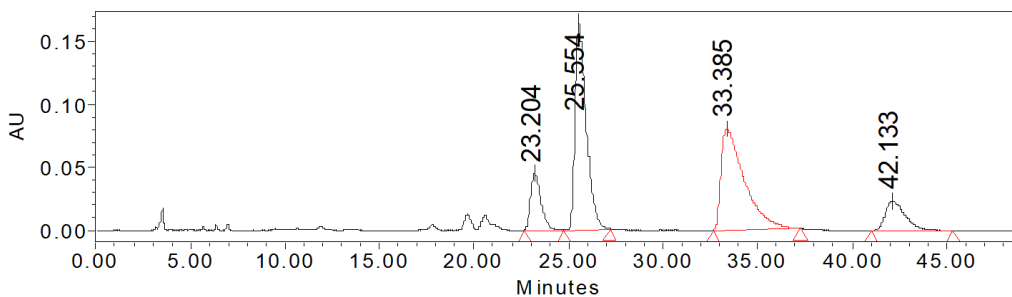

|   | Retention Time | Area    | % Area |
|---|----------------|---------|--------|
| 1 | 23.204         | 1714503 | 9.99   |
| 2 | 25.554         | 6876961 | 40.08  |
| 3 | 33.385         | 6840723 | 39.87  |
| 4 | 42.133         | 1725535 | 10.06  |

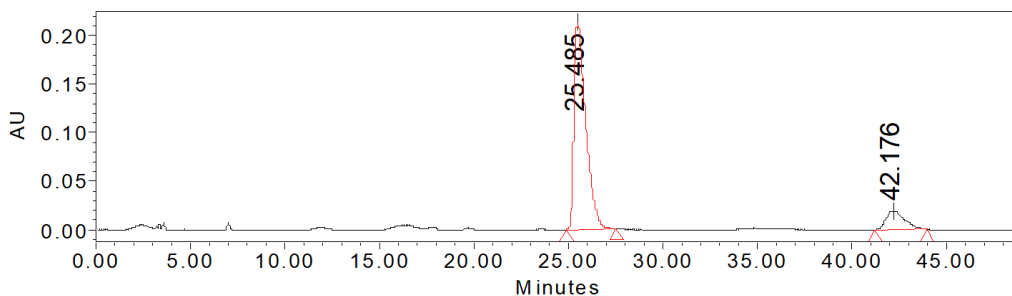

|   | Retention Time | Area    | % Area |
|---|----------------|---------|--------|
| 1 | 25.485         | 9323401 | 87.32  |

|   |        |         |       |
|---|--------|---------|-------|
| 2 | 42.176 | 1353773 | 12.68 |
|---|--------|---------|-------|

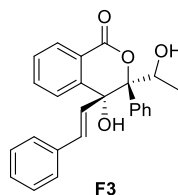

**F3**

**(3R,4R)-4-hydroxy-3-((R)-1-hydroxyethyl)-3-phenyl-4-((E)-styryl)isochroman-1-one**

The residue was purified by column chromatography on silica gel (PE/EtOAc = 4/1) to afford the desired product **F3**; 0.1 mmol scale reaction; 35.1 mg, white solid, 91% yield, 97% ee; determined by HPLC analysis [Daicel chiralpak ID, *n*-hexane/*i*-PrOH = 80/20, 1.0 mL/min,  $\lambda$  = 254 nm,  $t_1$  = 4.99 min,  $t_2$  = 5.66 min];

$^1\text{H}$  NMR (400 MHz,  $\text{CDCl}_3$ )  $\delta$  8.08 (dd,  $J$  = 7.6, 1.2 Hz, 1H), 7.97 – 7.94 (m, 2H), 7.88 (dd,  $J$  = 8.0, 1.2 Hz, 1H), 7.73 (td,  $J$  = 7.6, 1.4 Hz, 1H), 7.50 (td,  $J$  = 7.6, 1.2 Hz, 1H), 7.42 – 7.33 (m, 3H), 7.17 – 7.09 (m, 3H), 7.01 – 6.99 (m, 2H), 6.12 (d,  $J$  = 16.0 Hz, 1H), 6.01 (d,  $J$  = 16.0 Hz, 1H), 5.27 (s, 1H), 4.47 – 4.41 (m, 1H), 2.88 (d,  $J$  = 5.2 Hz, 1H), 1.03 (d,  $J$  = 6.4 Hz, 3H);

$^{13}\text{C}\{^1\text{H}\}$  NMR (101 MHz,  $\text{CDCl}_3$ )  $\delta$  163.1, 143.9, 136.1, 135.2, 134.9, 131.0, 130.4, 129.3, 128.3, 128.3, 128.1, 127.8, 127.7, 127.3, 126.5, 125.4, 123.2, 86.1, 77.7, 72.4, 18.9 ppm;

**m.p.** 149.1 – 152.0 °C;

**HRMS** (ESI)  $m/z$   $[\text{M}+\text{Na}]^+$  calcd for  $\text{C}_{25}\text{H}_{22}\text{O}_4\text{Na}$ : 409.1410, found: 409.1412;

$[\alpha]_D^{28}$  = +302.0 ( $c$  = 0.75 in  $\text{CHCl}_3$ );

**IR** (neat): 3350, 3022, 2925, 2856, 1706, 1602, 1493, 1451, 1415, 1375, 1294, 1250, 1218, 1093, 1024, 965, 751, 695, 560  $\text{cm}^{-1}$ .

HPLC spectrum of **F3**

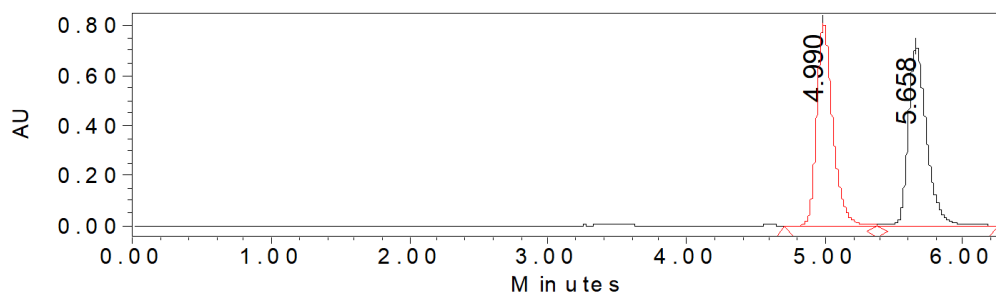

|   | Retention Time | Area    | % Area |
|---|----------------|---------|--------|
| 1 | 4.990          | 6511575 | 50.01  |
| 2 | 5.658          | 6508858 | 49.99  |

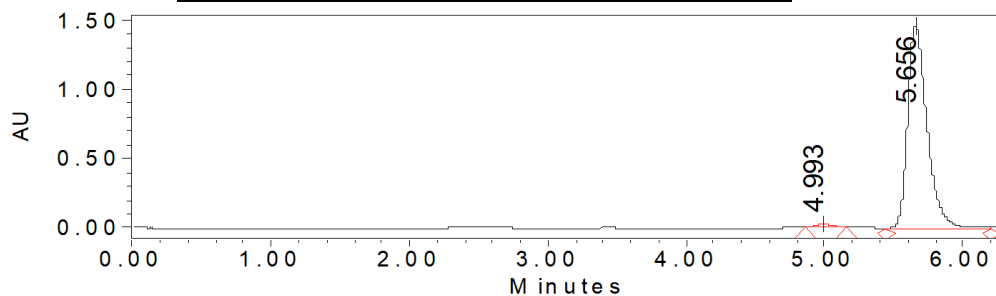

|   | Retention Time | Area     | % Area |
|---|----------------|----------|--------|
| 1 | 4.993          | 191598   | 1.35   |
| 2 | 5.656          | 13992313 | 98.65  |

## (F) Large scale experiment

### General experimental procedure for the scale-up reaction

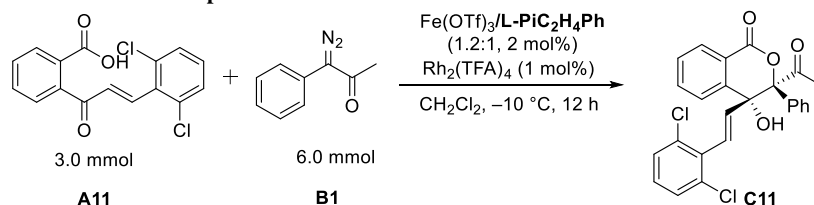

Ketoacid **A11** (3.0 mmol, 0.96 g),  $\text{Rh}_2(\text{TFA})_4$  (21.0 mg, 0.001 mmol, 1 mol%) were weighted into a oven-dried reaction tube. Then, in a glove box, prepared in advance  $\text{Fe}(\text{OTf})_3/\text{L-PiC}_2\text{H}_4\text{Ph}$  catalyst (72.0 mg, 0.02 mmol, 2 mol%) was added to the tube, anhydrous  $\text{CH}_2\text{Cl}_2$  (35.0 mL) was added and the resulting solution was stirred at 35 °C for 2–3 h. After the solution was cooled to –10 °C for 20 min,  $\alpha$ -diazoketones **B1** solution (6.0 mmol,

0.96 g, 25 mL CH<sub>2</sub>Cl<sub>2</sub>) was slowly added, the reaction mixture was stirred at –10 °C for 12 h. The reaction system was purified by column chromatography on silica gel (PE/CH<sub>2</sub>Cl<sub>2</sub> = 1.5:1) to afford the desired product **C11** in 71% yield (0.963g) with 97% ee.

## (G) The transformations of the product

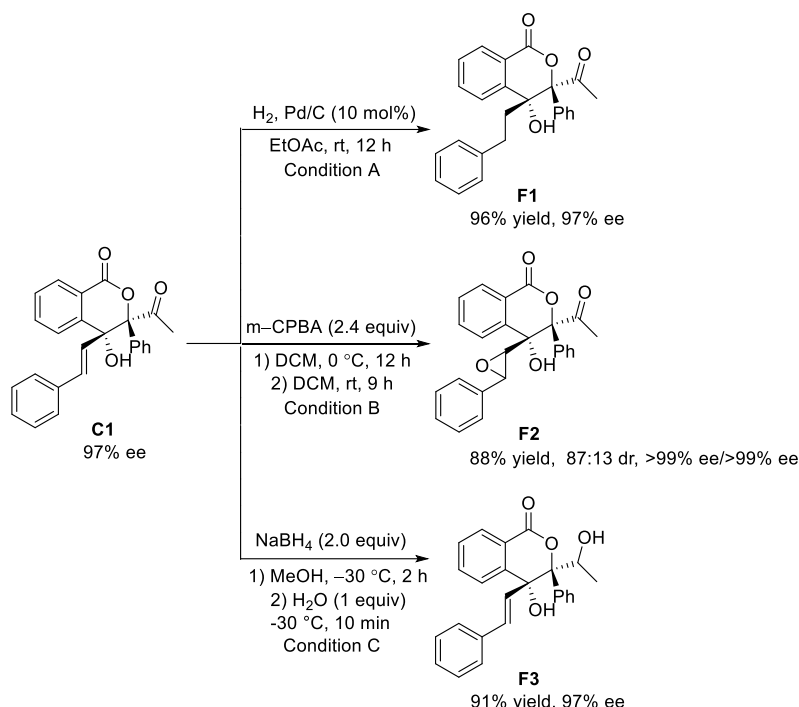

Condition A: The compound **C1** (38.4 mg, 0.10 mmol, 97% ee) was dissolved in EtOAc (2 mL), and 10% Pd/C (3.84 mg) was added to the mixture. Under H<sub>2</sub> atmosphere using balloon, the mixture was stirred at rt for 12 h. After completion of the reaction, the reaction mixture was filtered through a pad of celite, and the solvent was removed under reduced pressure and the obtained crude compound was purified by column chromatography on silica gel (PE/EtOAc = 5/1) to give the product **F1** in 96% yield with 97% ee.

Condition B: A reaction tube was charged with **C1** (38.4 mg, 0.10 mmol, 97% ee), *m*-CPBA (2.0 equiv, 48.8 mg) and anhydrous CH<sub>2</sub>Cl<sub>2</sub> (1.0 mL). The resulting solution was stirred at 0 °C for 12 h, then continued to react for 9 h at room temperature. The reaction would be quenched by NaHCO<sub>3</sub> (aq). The resulting solution was extracted with CH<sub>2</sub>Cl<sub>2</sub> (3×10 mL). The combined organic layers were dried over Na<sub>2</sub>SO<sub>4</sub>, filtered and concentrated in vacuo. The residue was purified by column chromatography on silica gel (PE/EtOAc = 5/1) to afford the desired product **F2** in 88% yield with 87:13 dr and >99% ee/>99% ee.

Condition C: An oven-dried test tube was charged with **C1** (38.4 mg, 0.10 mmol, 97% ee) and NaBH<sub>4</sub> (2.0 equiv, 7.6 mg) under N<sub>2</sub> atmosphere. After MeOH (2.0 mL) was added under –30 °C, the mixture was stirred at –30 °C for 2 h. Then the reaction was quenched by H<sub>2</sub>O (15 μL) at –30 °C. The reaction system was purified by column chromatography on silica gel (PE/EtOAc = 4/1) to afford the desired product **F3** in 91% yield with 97% ee.

## (H) Control experiments

### Control experiment 1

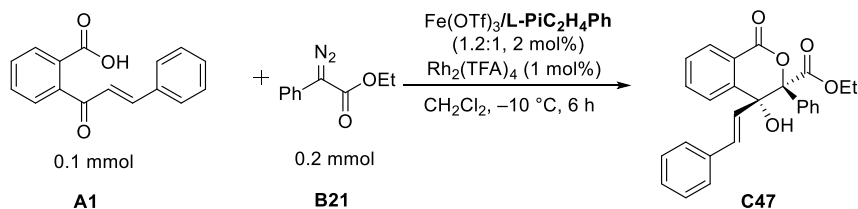

In a glovebox, ketoacid **A1** (0.1 mmol), Rh<sub>2</sub>(TFA)<sub>4</sub> (0.70 mg, 0.001 mmol, 1 mol%), and Fe(OTf)<sub>3</sub>/*L*-PiC<sub>2</sub>H<sub>4</sub>Ph (2.0 mol%, 1.2:1) were weighed into a dried test tube. Anhydrous CH<sub>2</sub>Cl<sub>2</sub> (1.0 mL) was added and the solution was stirred at 35 °C for 0.5 h. After the solution was cooled to –10 °C, ethyl 2-diazo-2-phenylacetate **B21** (0.20 mmol in 1.0 mL CH<sub>2</sub>Cl<sub>2</sub>) was added, and the reaction mixture was stirred at –10 °C for 6 h. The reaction system was purified by column chromatography on silica gel (PE/EtOAc = 10:1) to afford the desired product **C47** in 99% yield without enantioselectivity.

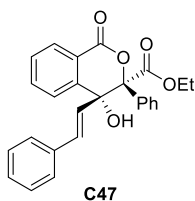

**C47:** HPLC analysis [Daicel chiralpak IA, n-hexane/i-PrOH = 80/20, 1.0 mL/min,  $\lambda$  = 254 nm,  $t_1$  = 7.23 min,  $t_2$  = 8.66 min];

**$^1\text{H}$  NMR** (400 MHz,  $\text{CDCl}_3$ )  $\delta$  8.12 (dd,  $J$  = 7.6, 1.2 Hz, 1H), 7.83 – 7.79 (m, 3H), 7.73 (td,  $J$  = 7.6, 1.6 Hz, 1H), 7.53 – 7.49 (m, 1H), 7.44 – 7.38 (m, 3H), 7.22 – 7.17 (m, 3H), 7.13 – 7.11 (m, 2H), 6.20 (d,  $J$  = 15.6 Hz, 1H), 6.08 (dd,  $J$  = 15.6, 1.2 Hz, 1H), 5.25 (d,  $J$  = 1.2 Hz, 1H), 4.19 – 4.11 (m, 1H), 4.06 – 3.97 (m, 1H), 1.01 (t,  $J$  = 7.2 Hz, 3H);

**$^{13}\text{C}\{^1\text{H}\}$  NMR** (101 MHz,  $\text{CDCl}_3$ )  $\delta$  172.2, 163.2, 145.2, 135.9, 135.3, 132.8, 132.0, 129.8, 129.1, 128.8, 128.4, 128.0, 128.0, 126.9, 126.7, 126.6, 125.1, 122.9, 87.1, 76.6, 63.1, 13.5 ppm;

**HRMS** (ESI)  $m/z$   $[\text{M}+\text{Na}]^+$  calcd for  $\text{C}_{26}\text{H}_{22}\text{O}_5\text{Na}$ : 437.1359, found: 437.1358;

HPLC spectrum of **C47**

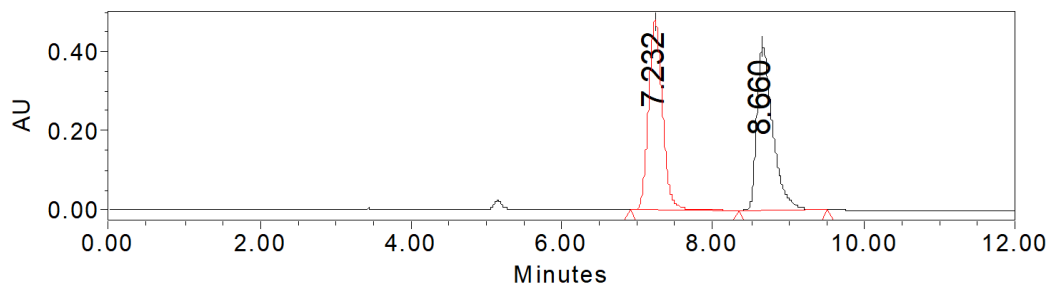

|   | Retention Time | Area    | % Area |
|---|----------------|---------|--------|
| 1 | 7.232          | 6122554 | 50.34  |
| 2 | 8.660          | 6040087 | 49.66  |

Control experiment 2

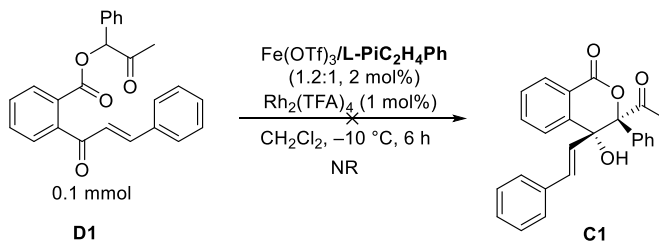

In a glovebox, intermediate **D1** (0.1 mmol),  $\text{Rh}_2(\text{TFA})_4$  (0.70 mg, 0.001 mmol, 1 mol%) and  $\text{Fe}(\text{OTf})_3/\text{L-PiC}_2\text{H}_4\text{Ph}$  (2.0 mol%, 1.2:1) were weighed into a dried test tube. Anhydrous  $\text{CH}_2\text{Cl}_2$  (1.0 mL) was added and the solution was stirred at 35 °C for 0.5 h. After the solution was cooled to –10 °C, the reaction mixture was stirred at –10 °C for 6 h. No reaction happened in this condition.

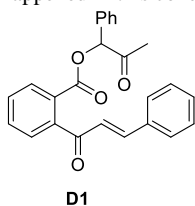

**$^1\text{H}$  NMR** (400 MHz,  $\text{CDCl}_3$ )  $\delta$  8.13 (dd,  $J$  = 8.0, 1.2 Hz, 1H), 7.66 – 7.62 (m, 1H), 7.59 – 7.55 (m, 1H), 7.46 – 7.44 (m, 3H), 7.41 – 7.33 (m, 8H), 7.21 (d,  $J$  = 16.4 Hz, 1H), 6.93 (d,  $J$  = 16.4 Hz, 1H), 6.10 (s, 1H), 2.11 (s, 3H);

**$^{13}\text{C}\{^1\text{H}\}$  NMR** (101 MHz,  $\text{CDCl}_3$ )  $\delta$  201.2, 196.0, 165.5, 145.5, 142.2, 134.3, 132.7, 132.6, 130.6, 130.6, 129.7, 129.3, 128.9, 128.8, 128.4, 128.2, 128.1, 127.6, 127.1, 81.9, 26.1 ppm;

**HRMS** (ESI)  $m/z$   $[\text{M}+\text{Na}]^+$  calcd for  $\text{C}_{25}\text{H}_{20}\text{O}_4\text{Na}$ : 407.1254, found: 407.1251;

Control experiment 3

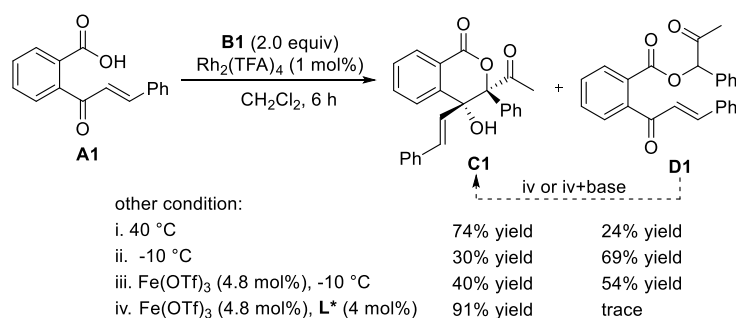

Condition i: In a glovebox, ketoacid **A1** (0.1 mmol) and Rh<sub>2</sub>(TFA)<sub>4</sub> (0.70 mg, 0.001 mmol, 1 mol%) were weighted into a dried test tube. Anhydrous CH<sub>2</sub>Cl<sub>2</sub> (1.0 mL) was added and the solution was stirred at 40 °C.  $\alpha$ -diazoketone **B1** (0.20 mmol in 1.0 mL CH<sub>2</sub>Cl<sub>2</sub>) was added, the reaction mixture was stirred at 40 °C for 6 h. The reaction system was purified by column chromatography on silica gel (PE/CH<sub>2</sub>Cl<sub>2</sub> = 1:1) to afford the racemic product **C1** in 74% yield and racemic intermediate **D1** in 24% yield.

Condition ii: In a glovebox, ketoacid **A1** (0.1 mmol) and Rh<sub>2</sub>(TFA)<sub>4</sub> (0.70 mg, 0.001 mmol, 1 mol%) were weighted into a dried test tube. Anhydrous CH<sub>2</sub>Cl<sub>2</sub> (1.0 mL) was added and the solution was stirred at -10 °C. Then,  $\alpha$ -diazoketone **B1** (0.20 mmol in 1.0 mL CH<sub>2</sub>Cl<sub>2</sub>) was added at -10 °C, and the reaction mixture was stirred at -10 °C for 6 h. The reaction system was purified by column chromatography on silica gel (PE/CH<sub>2</sub>Cl<sub>2</sub> = 1:1) to afford the racemic product **C1** in 30% yield and racemic intermediate **D1** in 69% yield.

Condition iii: In a glovebox, ketoacid **A1** (0.1 mmol), Rh<sub>2</sub>(TFA)<sub>4</sub> (0.70 mg, 0.001 mmol, 1 mol%) and Fe(OTf)<sub>3</sub> (4.8 mol%) were weighted into a dried test tube. Anhydrous CH<sub>2</sub>Cl<sub>2</sub> (1.0 mL) was added and the solution was stirred at 35 °C for 0.5 h. After the solution was cooled to -10 °C,  $\alpha$ -diazoketone **B1** (0.20 mmol in 1.0 mL CH<sub>2</sub>Cl<sub>2</sub>) was added, and the reaction mixture was stirred at -10 °C for 6 h. The reaction system was purified by column chromatography on silica gel (PE/CH<sub>2</sub>Cl<sub>2</sub> = 1:1) to afford the racemic product **C1** in 40% yield and racemic intermediate **D1** in 54% yield.

Condition iv: In a glovebox, ketoacid **A1** (0.1 mmol), Rh<sub>2</sub>(TFA)<sub>4</sub> (0.70 mg, 0.001 mmol, 1 mol%) and Fe(OTf)<sub>3</sub>/L<sup>\*</sup>-PiC<sub>2</sub>H<sub>4</sub>Ph (4 mol%, 1.2:1) were weighted into a dried test tube. Anhydrous CH<sub>2</sub>Cl<sub>2</sub> (1.0 mL) was added and the solution was stirred at 35 °C for 0.5 h. After the solution was cooled to -10 °C,  $\alpha$ -diazoketone **B1** (0.20 mmol in 1.0 mL CH<sub>2</sub>Cl<sub>2</sub>) was added, and the reaction mixture was stirred at -10 °C for 6 h. The reaction system was purified by column chromatography on silica gel (PE/EtOAc = 10:1) to afford the desired product **C1** in 91% yield with 97% ee and racemic intermediate **D1** in trace yield.

#### Control experiment 4

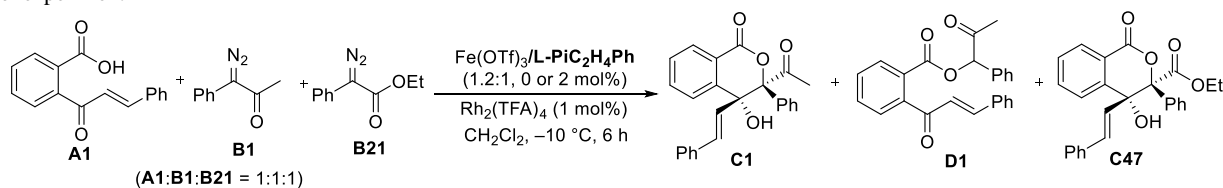

1) with Fe-L: **C1** (45% yield, 95% ee); **C47** (51% yield, 0% ee)  
 2) without Fe-L: **C1** (18% yield); **D1** (32% yield); **C47** (54% yield)

Condition 1: In a glovebox, ketoacid **A1** (0.1 mmol), Rh<sub>2</sub>(TFA)<sub>4</sub> (0.70 mg, 0.001 mmol, 1 mol%) and Fe(OTf)<sub>3</sub>/L<sup>\*</sup>-PiC<sub>2</sub>H<sub>4</sub>Ph (2.0 mol%, 1.2:1) were weighted into a dried test tube. Anhydrous CH<sub>2</sub>Cl<sub>2</sub> (1.0 mL) was added and the solution was stirred at 35 °C for 0.5 h. After the solution was cooled to -10 °C,  $\alpha$ -diazoketone **B1** (0.10 mmol) and  $\alpha$ -diazoester **B27** (0.10 mmol) in 1.0 mL CH<sub>2</sub>Cl<sub>2</sub> were added, and the reaction mixture was stirred at -10 °C for 6 h. The reaction system was purified by column chromatography on silica gel (PE/EtOAc = 10:1) to afford the desired product **C1** in 45% yield with 95% ee and **C47** in 51% yield with 0% ee.

Condition 1: In a glovebox, ketoacid **A1** (0.1 mmol), Rh<sub>2</sub>(TFA)<sub>4</sub> (0.70 mg, 0.001 mmol, 1 mol%) weighted into a dried test tube. Anhydrous CH<sub>2</sub>Cl<sub>2</sub> (1.0 mL) was added. After the solution was cooled to -10 °C,  $\alpha$ -diazoketone **B1** (0.10 mmol) and  $\alpha$ -diazoester **B27** (0.10 mmol) in 1.0 mL CH<sub>2</sub>Cl<sub>2</sub> were added, and the reaction mixture was stirred at -10 °C for 6 h. The reaction system was purified by column chromatography on silica gel (PE/EtOAc = 10:1) to afford the desired product **C1** in 18% yield, **D1** in 32% yield and **C47** in 54% yield.

#### Control experiment 5

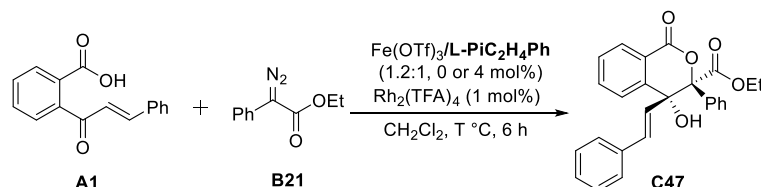

| Entry <sup>a</sup> | T   | Background reaction: yield (%) <sup>b</sup> | Cat: yield (%) <sup>b</sup> | ee (%) <sup>c</sup> |
|--------------------|-----|---------------------------------------------|-----------------------------|---------------------|
| 1                  | -30 | 91                                          | 92                          | 0                   |
| 2                  | -40 | 90                                          | 90                          | 0                   |
| 3                  | -50 | 87                                          | 89                          | 0                   |
| 4                  | -60 | 85                                          | 82                          | 0                   |

<sup>a</sup> Unless otherwise noted, all reactions were carried out with **A1** (0.10 mmol), **B21** (2.0 equiv), Fe(OTf)<sub>3</sub>/L<sup>\*</sup>-PiC<sub>2</sub>H<sub>4</sub>Ph (1:1, 0 or 4 mol%), Rh<sub>2</sub>(TFA)<sub>4</sub> (1 mol%), in CH<sub>2</sub>Cl<sub>2</sub> (2.0 mL) at T °C for 6 h. <sup>b</sup> Isolated yield. <sup>c</sup> Determined by chiral HPLC analysis on a chiral stationary phase. All dr value were up to >19:1 detected by <sup>1</sup>H NMR.

#### Control experiment 6

| A1                 | B21                                |           | C47                 | D2                         |                         |
|--------------------|------------------------------------|-----------|---------------------|----------------------------|-------------------------|
| Entry <sup>a</sup> | Rh <sub>2</sub> source             | Conv. (%) | C47/D2 <sup>b</sup> | C47 yield (%) <sup>b</sup> | C47 ee (%) <sup>c</sup> |
| 1                  | Rh <sub>2</sub> (TFA) <sub>4</sub> | >99       | 85/15               | 85                         | 0                       |
| 2                  | Rh <sub>2</sub> (OAc) <sub>4</sub> | >99       | 88/12               | 88                         | 0                       |
| 3                  | Rh <sub>2</sub> (esp) <sub>4</sub> | >99       | 70/30               | 70                         | 0                       |
| 4                  | Rh <sub>2</sub> (Oct) <sub>4</sub> | >99       | 80/20               | 80                         | 0                       |
| 5                  | Rh <sub>2</sub> (piv) <sub>4</sub> | >99       | 35/65               | 35                         | 0                       |

<sup>a</sup> Unless otherwise noted, the reactions were performed with **A1** (0.10 mmol), **B21** (0.20 mmol), Fe(OTf)<sub>3</sub> (4.8 mol%), **L-PiC<sub>2</sub>H<sub>4</sub>Ph** (4 mol%), Rh<sub>2</sub> source (1 mol%), in CH<sub>2</sub>Cl<sub>2</sub> (2.0 mL) at -60 °C for 6 h. <sup>b</sup> Isolated yield. <sup>c</sup> Determined by chiral HPLC.

## (I) pK<sub>aH</sub> prediction via XGBoost

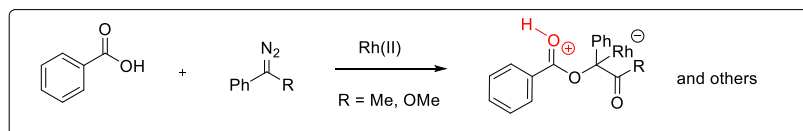

pK<sub>aH</sub> prediction via XGBoost (Agenw. Chem. Int. Ed. 2020, 59, 19282)

|                              |               |                              |               |                              |               |                              |              |                              |               |                              |              |                              |               |                              |              |
|------------------------------|---------------|------------------------------|---------------|------------------------------|---------------|------------------------------|--------------|------------------------------|---------------|------------------------------|--------------|------------------------------|---------------|------------------------------|--------------|
| <br>H <sub>2</sub> O<br>DMSO | 3.15<br>10.62 | <br>H <sub>2</sub> O<br>DMSO | 3.31<br>10.06 | <br>H <sub>2</sub> O<br>DMSO | 3.21<br>10.12 | <br>H <sub>2</sub> O<br>DMSO | 3.54<br>9.26 | <br>H <sub>2</sub> O<br>DMSO | -2.40<br>7.13 | <br>H <sub>2</sub> O<br>DMSO | 1.88<br>8.09 | <br>H <sub>2</sub> O<br>DMSO | -1.05<br>5.65 | <br>H <sub>2</sub> O<br>DMSO | 1.50<br>7.73 |
|                              |               |                              |               |                              |               |                              |              |                              |               |                              |              |                              |               |                              |              |
| <br>H <sub>2</sub> O<br>DMSO | 3.95<br>11.46 | <br>H <sub>2</sub> O<br>DMSO | 3.40<br>10.70 | <br>H <sub>2</sub> O<br>DMSO | 3.30<br>10.35 | <br>H <sub>2</sub> O<br>DMSO | 3.42<br>9.85 | <br>H <sub>2</sub> O<br>DMSO | -0.87<br>7.19 | <br>H <sub>2</sub> O<br>DMSO | 1.45<br>7.51 | <br>H <sub>2</sub> O<br>DMSO | 0.64<br>6.22  | <br>H <sub>2</sub> O<br>DMSO | 1.10<br>7.42 |
|                              |               |                              |               |                              |               |                              |              |                              |               |                              |              |                              |               |                              |              |

pK<sub>a</sub> prediction via XGBoost (Agenw. Chem. Int. Ed. 2020, 59, 19282)

17

18

19

20

21

22

| R   | 17               |              | 18               |              | 19               |              | 20               |       | 21               |       | 22               |       |
|-----|------------------|--------------|------------------|--------------|------------------|--------------|------------------|-------|------------------|-------|------------------|-------|
|     | H <sub>2</sub> O | DMSO         | H <sub>2</sub> O | DMSO         | H <sub>2</sub> O | DMSO         | H <sub>2</sub> O | DMSO  | H <sub>2</sub> O | DMSO  | H <sub>2</sub> O | DMSO  |
| Me  | 7.82             | 16.17        | 7.51             | 13.06        | 7.69             | 13.36        | 7.60             | 13.92 | 8.04             | 13.37 | 6.77             | 12.77 |
| OMe | <b>10.30</b>     | <b>17.43</b> | <b>7.23</b>      | <b>13.43</b> | 7.60             | 13.92        | 7.52             | 12.16 | 7.52             | 12.16 | 6.04             | 11.52 |
| Ph  | 8.56             | 16.53        | 7.77             | 13.55        | <b>7.31</b>      | <b>11.64</b> | 8.01             | 12.53 | 6.75             | 12.15 | 6.11             | 9.70  |

website: <http://isyn.luosizgroup.com/prediction>

## (J) X-ray crystal structure of the product C1 and F3

Single crystal of **C1** was obtained by recrystallization in hexane, CH<sub>2</sub>Cl<sub>2</sub> and <sup>t</sup>PrOH; CCDC (**C1**: 2004207) contains the supplementary crystallographic data which can be obtained free of charge from The Cambridge Crystallographic Data Center.

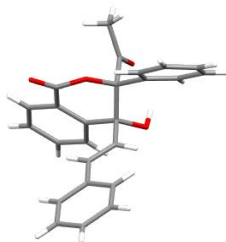

|                                                   |                                                |
|---------------------------------------------------|------------------------------------------------|
| Formula                                           | C <sub>25</sub> H <sub>20</sub> O <sub>4</sub> |
| Formula mass (amu)                                | 384.41                                         |
| Space group                                       | P 61                                           |
| <i>a</i> (Å)                                      | 17.6742 (3)                                    |
| <i>b</i> (Å)                                      | 17.6742 (3)                                    |
| <i>c</i> (Å)                                      | 11.6231 (3)                                    |
| $\alpha$ (deg)                                    | 90                                             |
| $\beta$ (deg)                                     | 90                                             |
| $\gamma$ (deg)                                    | 120                                            |
| <i>V</i> (Å <sup>3</sup> )                        | 3144.36 (15)                                   |
| <i>Z</i>                                          | 6                                              |
| $\lambda$ (Å)                                     | 1.54178                                        |
| <i>T</i> (K)                                      | 170                                            |
| $\rho_{\text{calcd}}$ (g cm <sup>-3</sup> )       | 1.218                                          |
| $\mu$ (mm <sup>-1</sup> )                         | 0.663                                          |
| Transmission factors                              | 0.797, 0.975                                   |
| $\theta_{\text{max}}$ (deg)                       | 80.488                                         |
| No. of unique data, including $F_o^2 < 0$         | 4224                                           |
| No. of unique data, with $F_o^2 > 2\sigma(F_o^2)$ | 4032                                           |
| No. of variables                                  | 268                                            |
| $R(F)$ for $F_o^2 > 2\sigma(F_o^2)$ <sup>a</sup>  | 0.0383                                         |
| $R_w(F_o^2)$ <sup>b</sup>                         | 0.1046                                         |
| Goodness of fit                                   | 1.089                                          |

<sup>a</sup>  $R(F) = \sum ||F_o| - |F_c|| / \sum |F_o|$ .

<sup>b</sup>  $R_w(F_o^2) = [\sum [w(F_o^2 - F_c^2)^2] / \sum wF_o^4]^{1/2}$ ;  $w^{-1} = [\sigma^2(F_o^2) + (Ap)^2 + Bp]$ , where  $p = [\max(F_o^2, 0) + 2F_c^2] / 3$

Single crystal of **F3** was obtained by recrystallization in hexane, CH<sub>2</sub>Cl<sub>2</sub> and <sup>t</sup>PrOH; CCDC (**F3**: 2085693) contains the supplementary crystallographic data which can be obtained free of charge from The Cambridge Crystallographic Data Center.

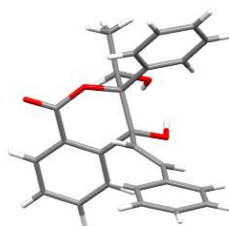

|                                             |                                                |
|---------------------------------------------|------------------------------------------------|
| Formula                                     | C <sub>25</sub> H <sub>22</sub> O <sub>4</sub> |
| Formula mass (amu)                          | 386.42                                         |
| Space group                                 | P 21 21 21                                     |
| <i>a</i> (Å)                                | 6.5263 (1)                                     |
| <i>b</i> (Å)                                | 13.9032 (3)                                    |
| <i>c</i> (Å)                                | 21.5712 (4)                                    |
| $\alpha$ (deg)                              | 90                                             |
| $\beta$ (deg)                               | 90                                             |
| $\gamma$ (deg)                              | 90                                             |
| <i>V</i> (Å <sup>3</sup> )                  | 1957.29 (6)                                    |
| <i>Z</i>                                    | 4                                              |
| $\lambda$ (Å)                               | 1.54178                                        |
| <i>T</i> (K)                                | 173                                            |
| $\rho_{\text{calcd}}$ (g cm <sup>-3</sup> ) | 1.311                                          |

|                                                   |              |
|---------------------------------------------------|--------------|
| $\mu$ (mm <sup>-1</sup> )                         | 0.711        |
| Transmission factors                              | 0.794, 0.940 |
| $\theta_{\max}$ (deg)                             | 68.254       |
| No. of unique data, including $F_o^2 < 0$         | 3454         |
| No. of unique data, with $F_o^2 > 2\sigma(F_o^2)$ | 3307         |
| No. of variables                                  | 271          |
| $R(F)$ for $F_o^2 > 2\sigma(F_o^2)$ <sup>a</sup>  | 0.0282       |
| $R_w(F_o^2)$ <sup>b</sup>                         | 0.0752       |
| Goodness of fit                                   | 1.127        |

<sup>a</sup>  $R(F) = \sum ||F_o| - |F_c|| / \sum |F_o|$ .

<sup>b</sup>  $R_w(F_o^2) = [\sum [w(F_o^2 - F_c^2)^2] / \sum w F_o^4]^{1/2}$ ;  $w^{-1} = [\sigma^2(F_o^2) + (Ap)^2 + Bp]$ , where  $p = [\max(F_o^2, 0) + 2F_c^2] / 3$

# (K) Copy of <sup>1</sup>H, <sup>13</sup>C{<sup>1</sup>H}, and <sup>19</sup>F{<sup>1</sup>H} NMR Spectra.

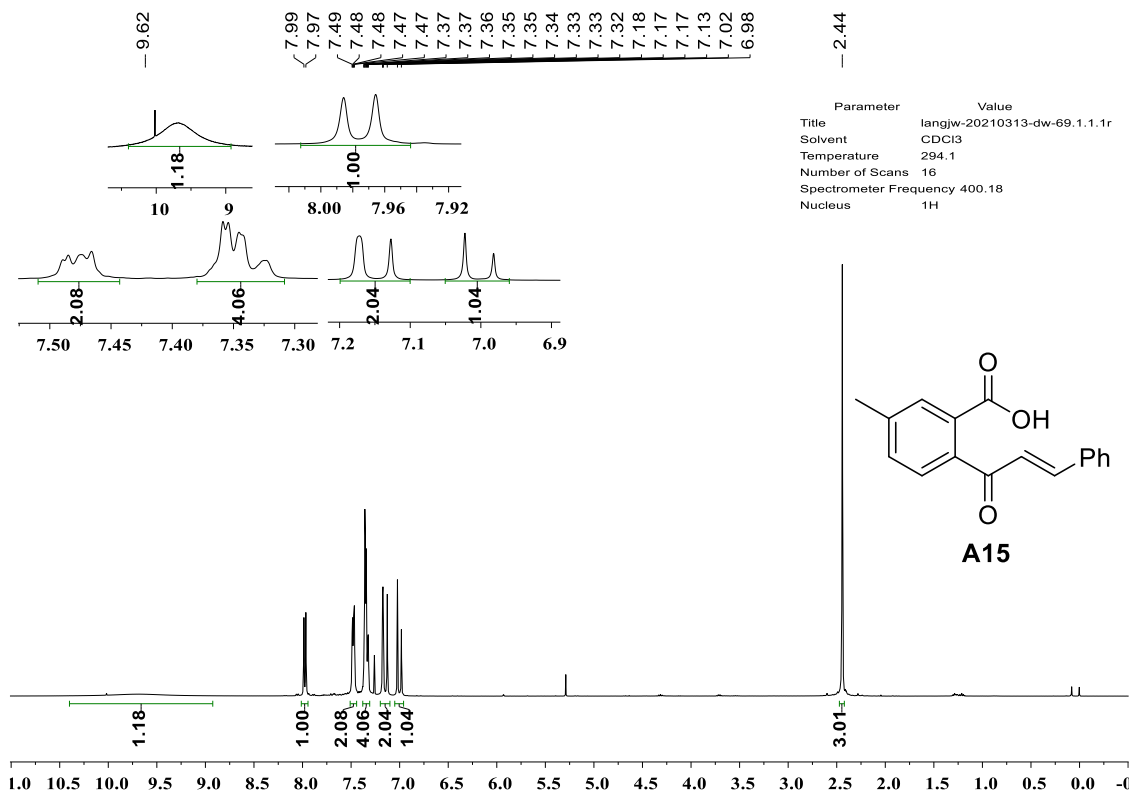



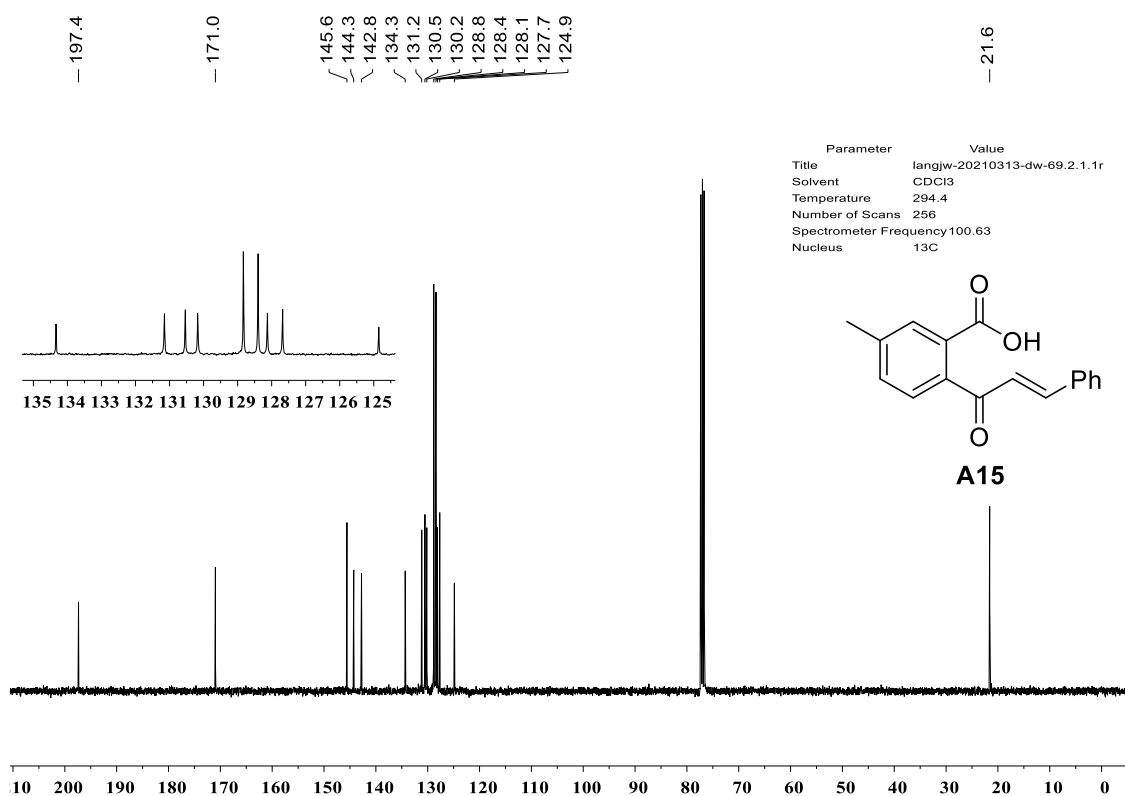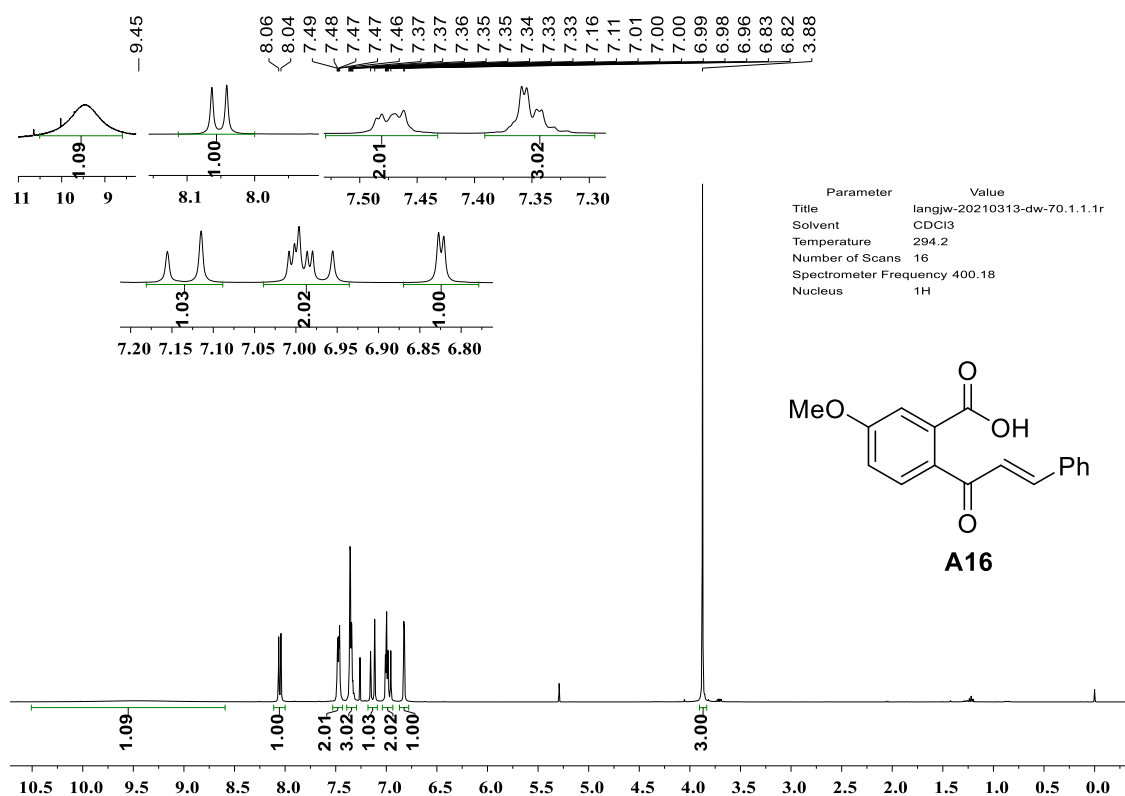

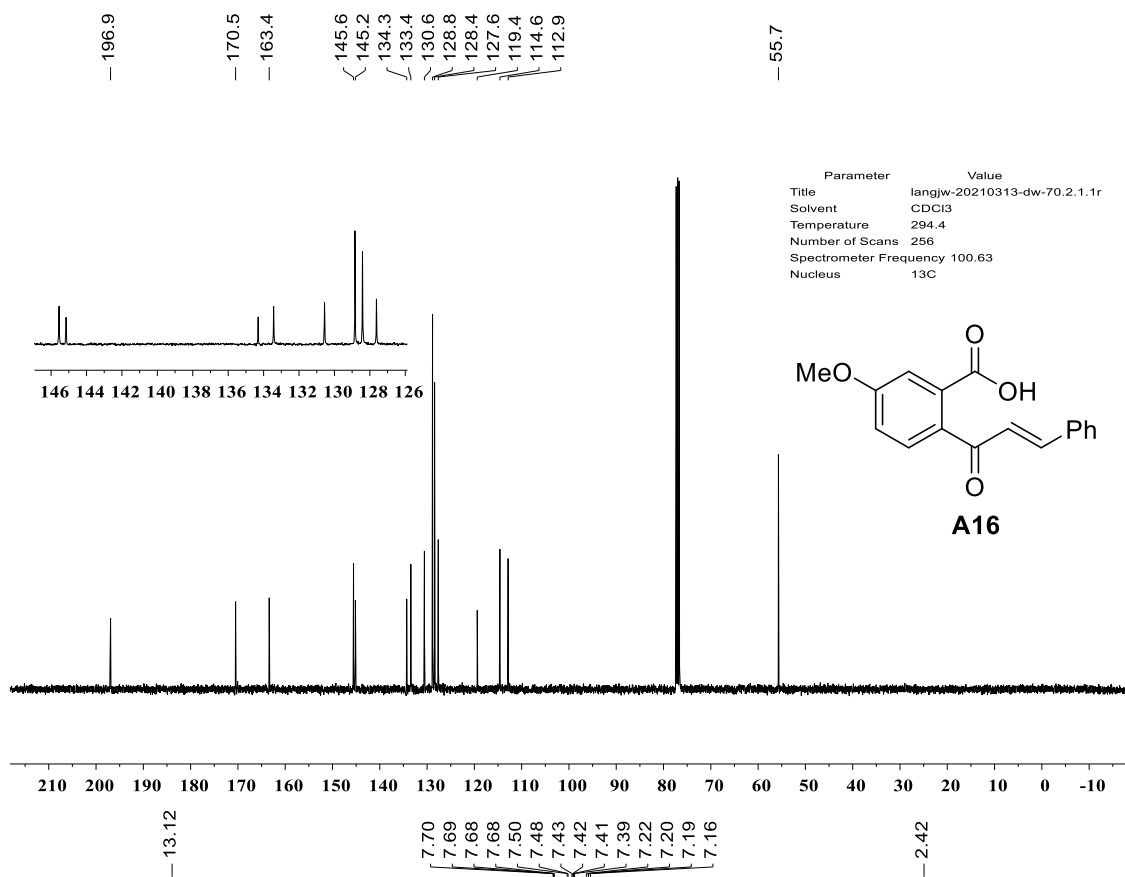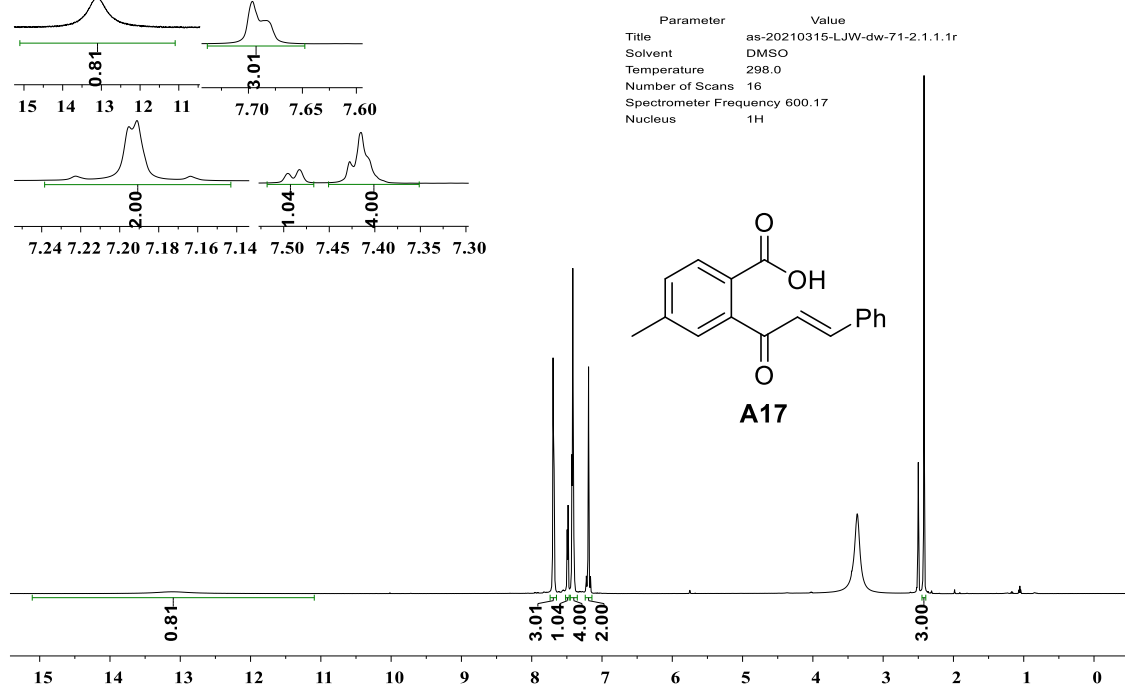

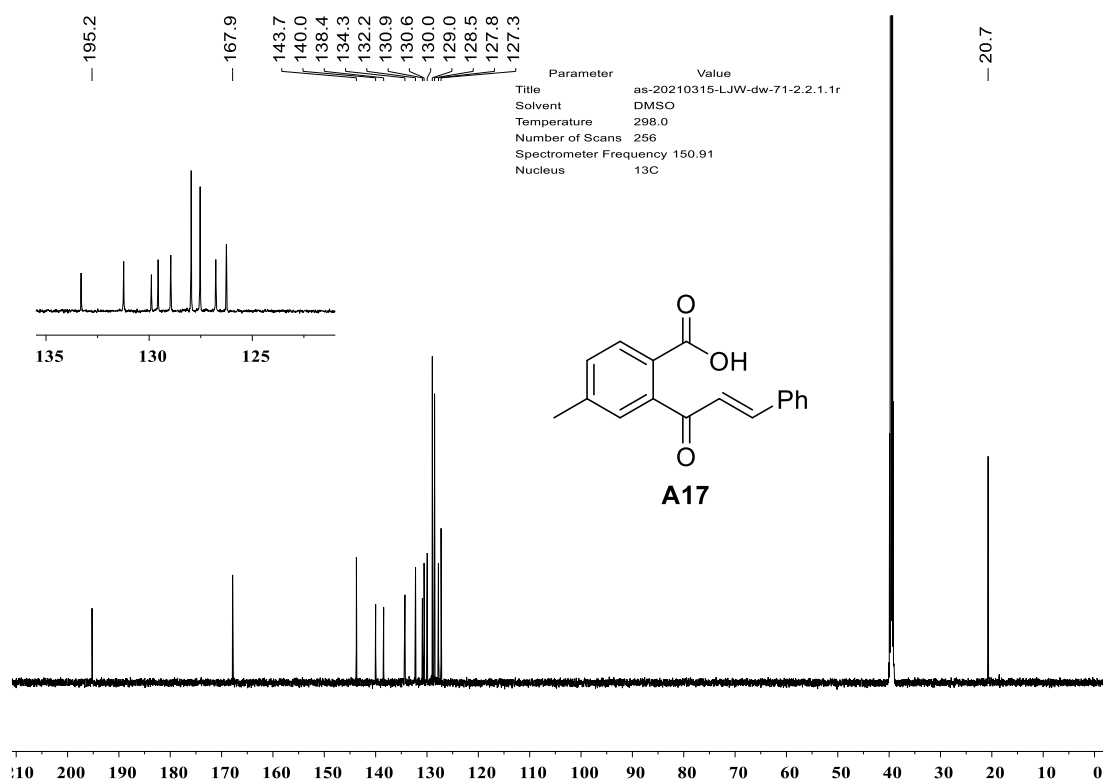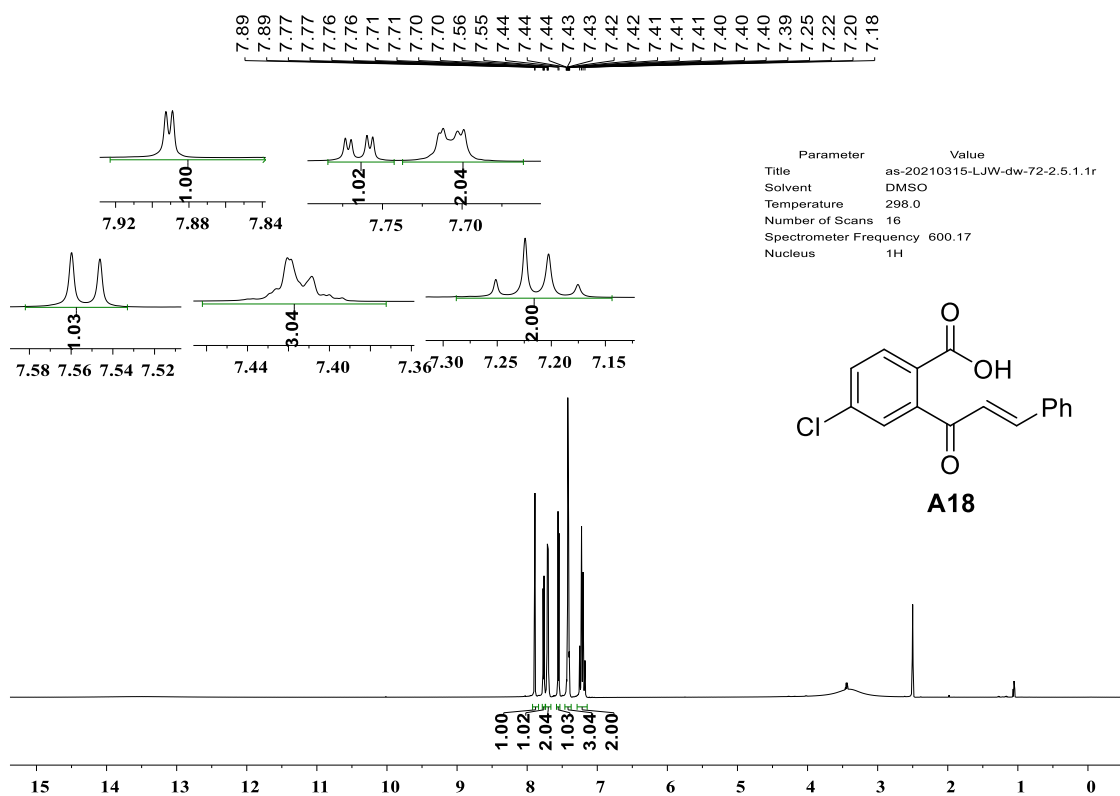

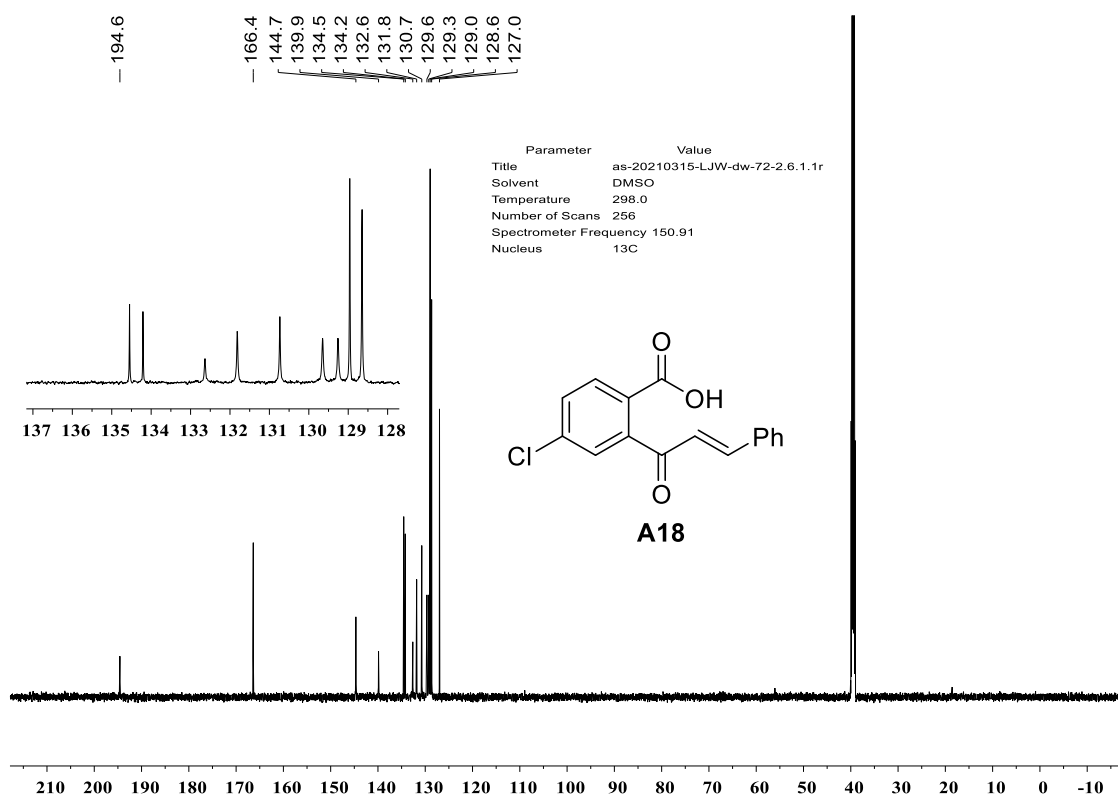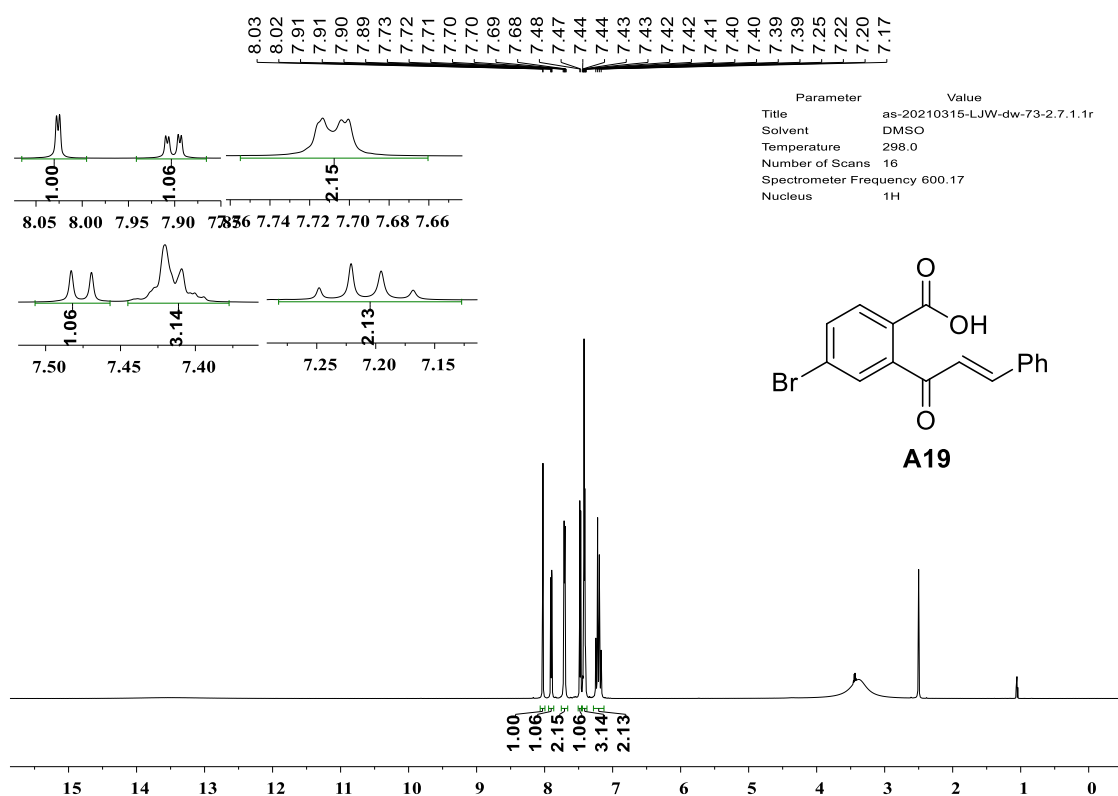

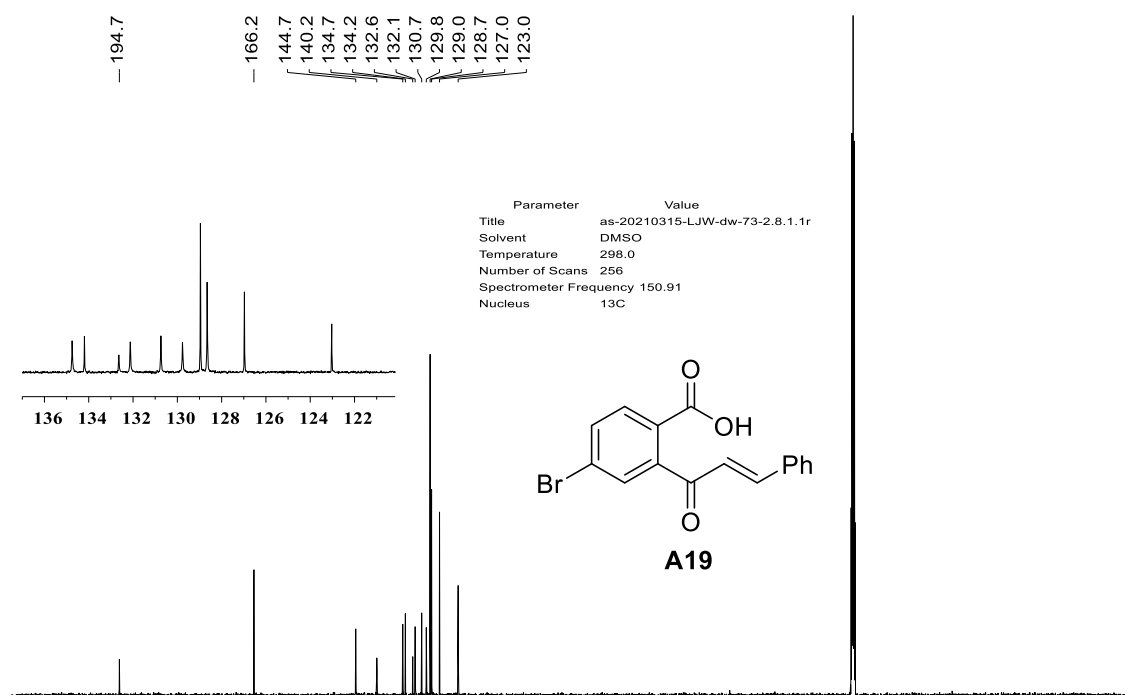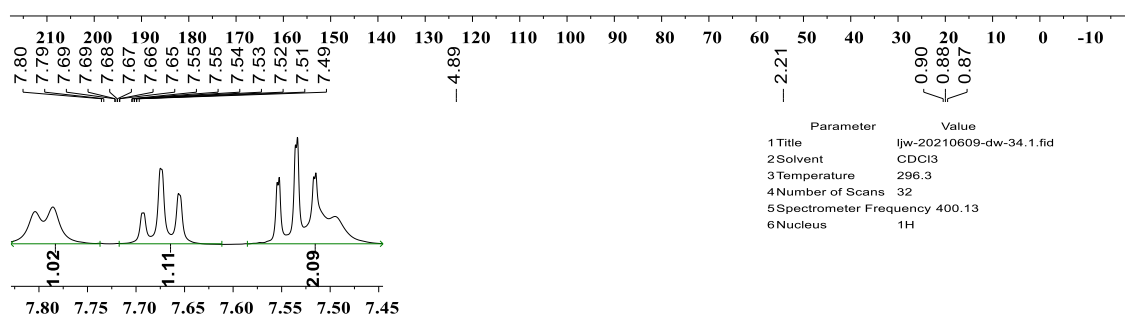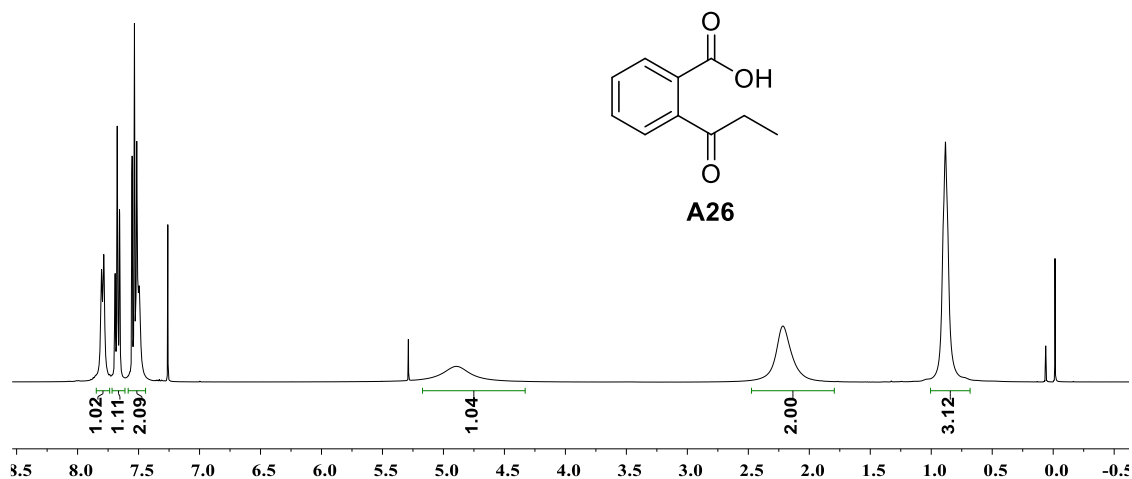

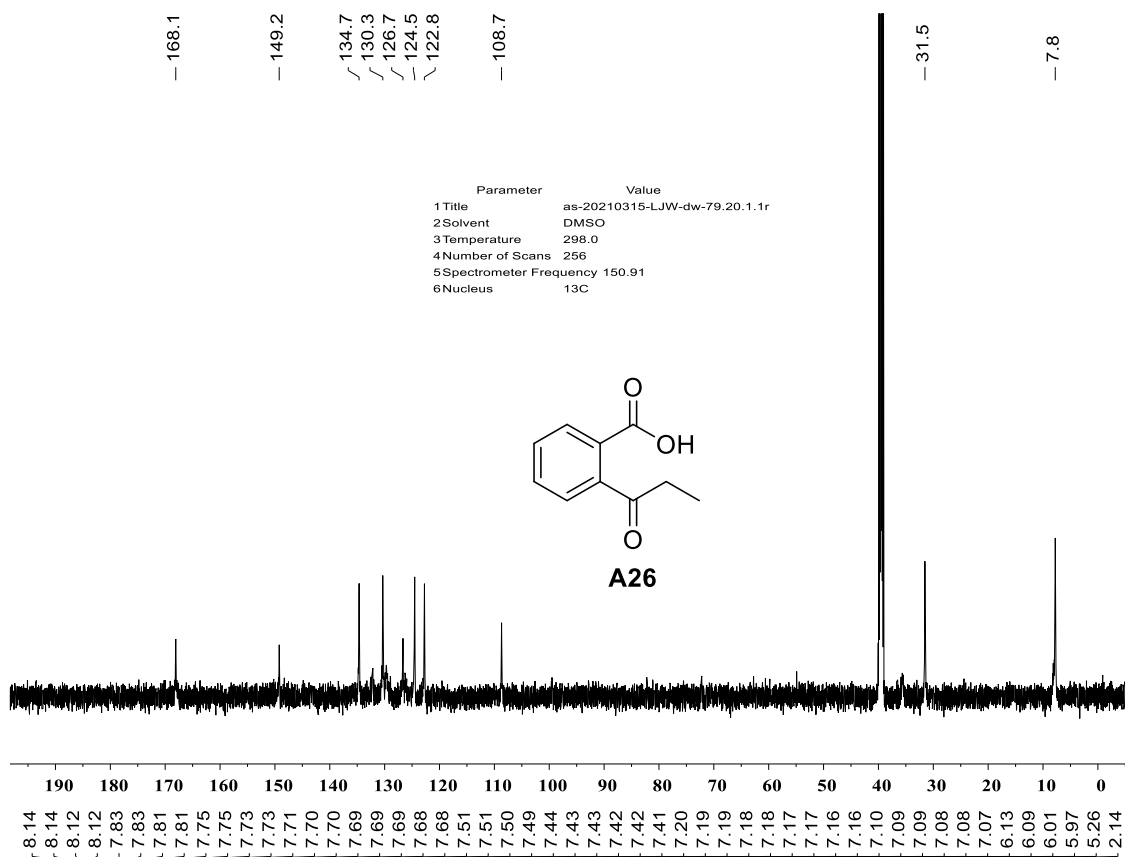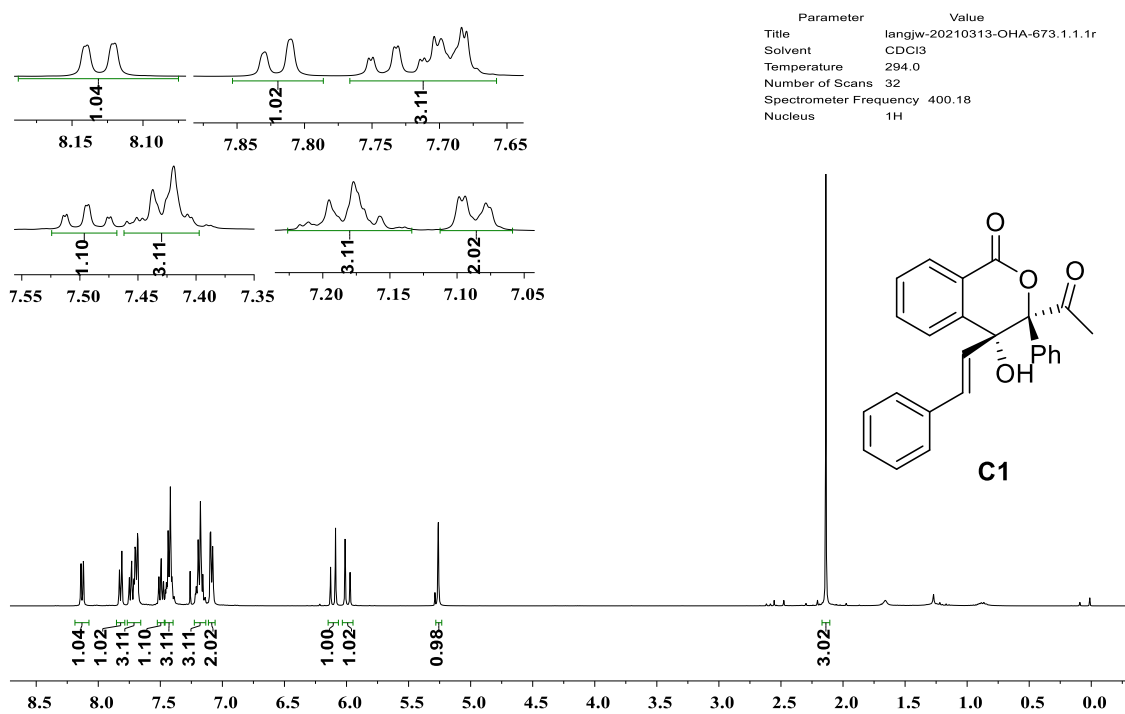

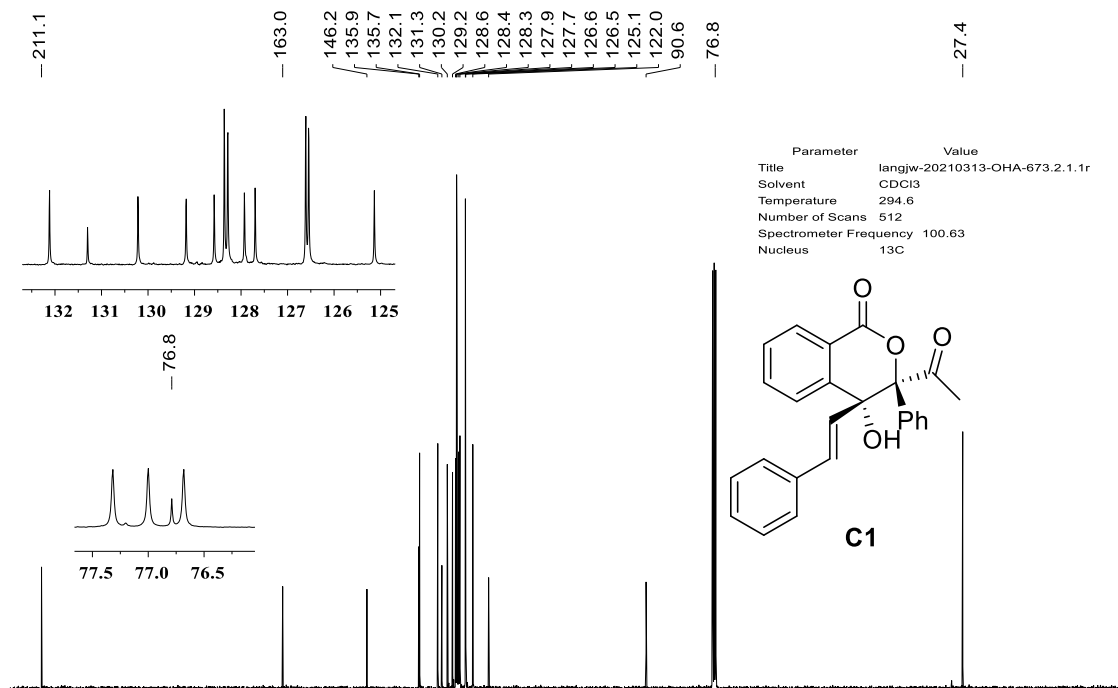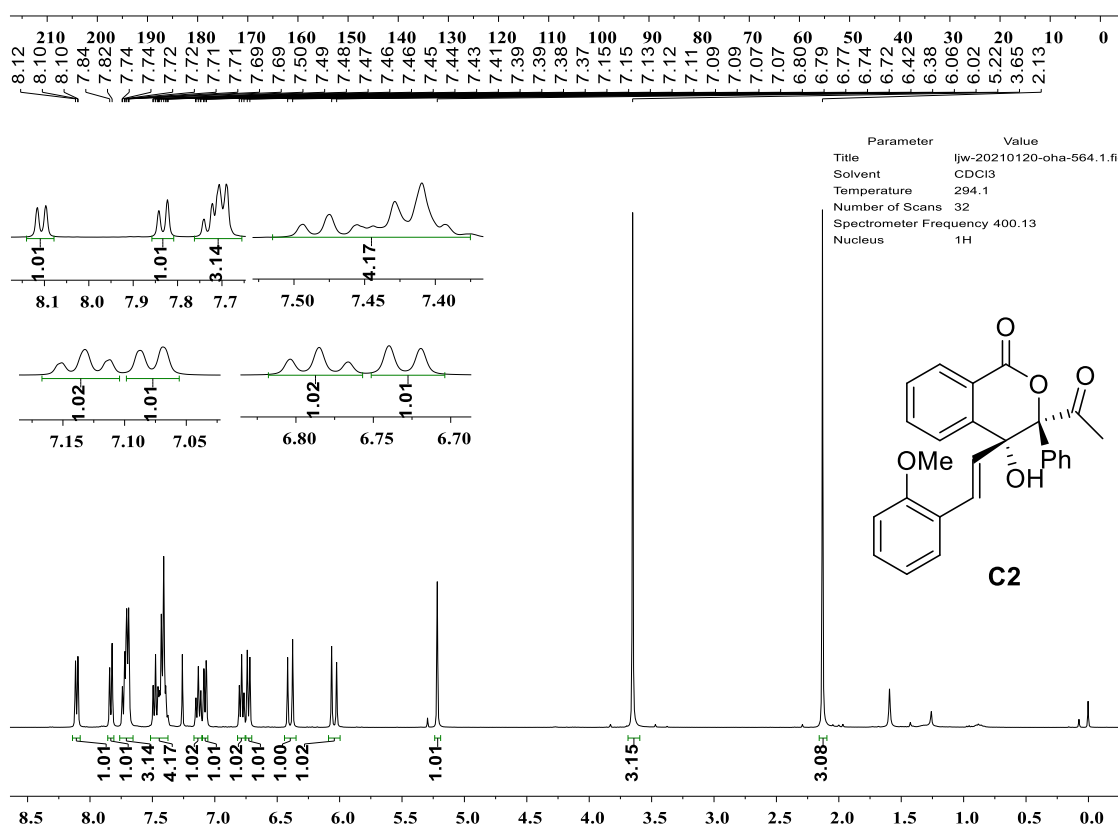

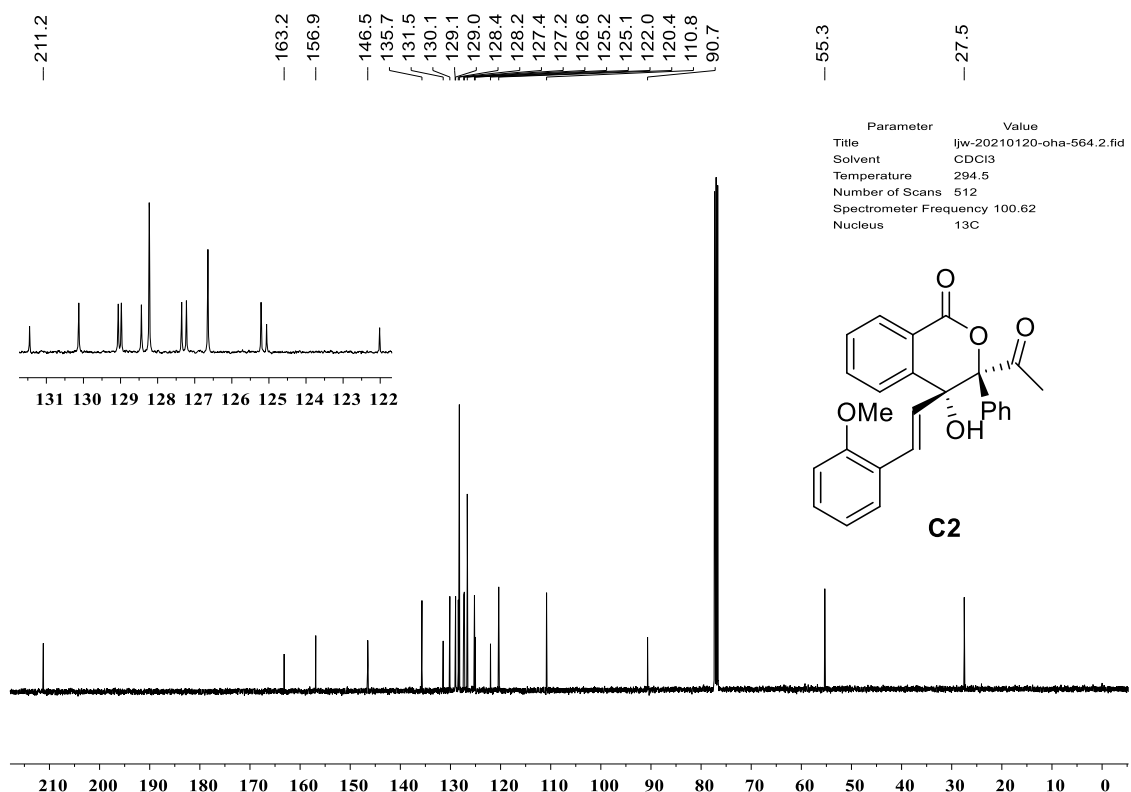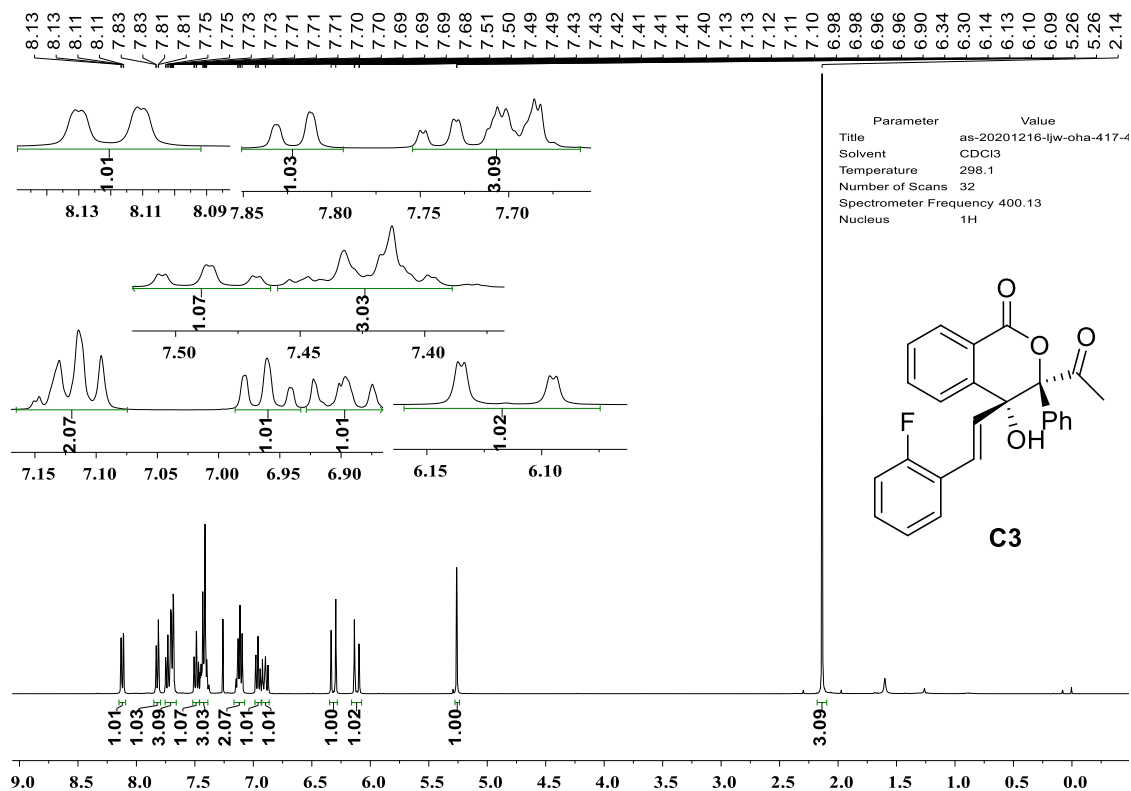



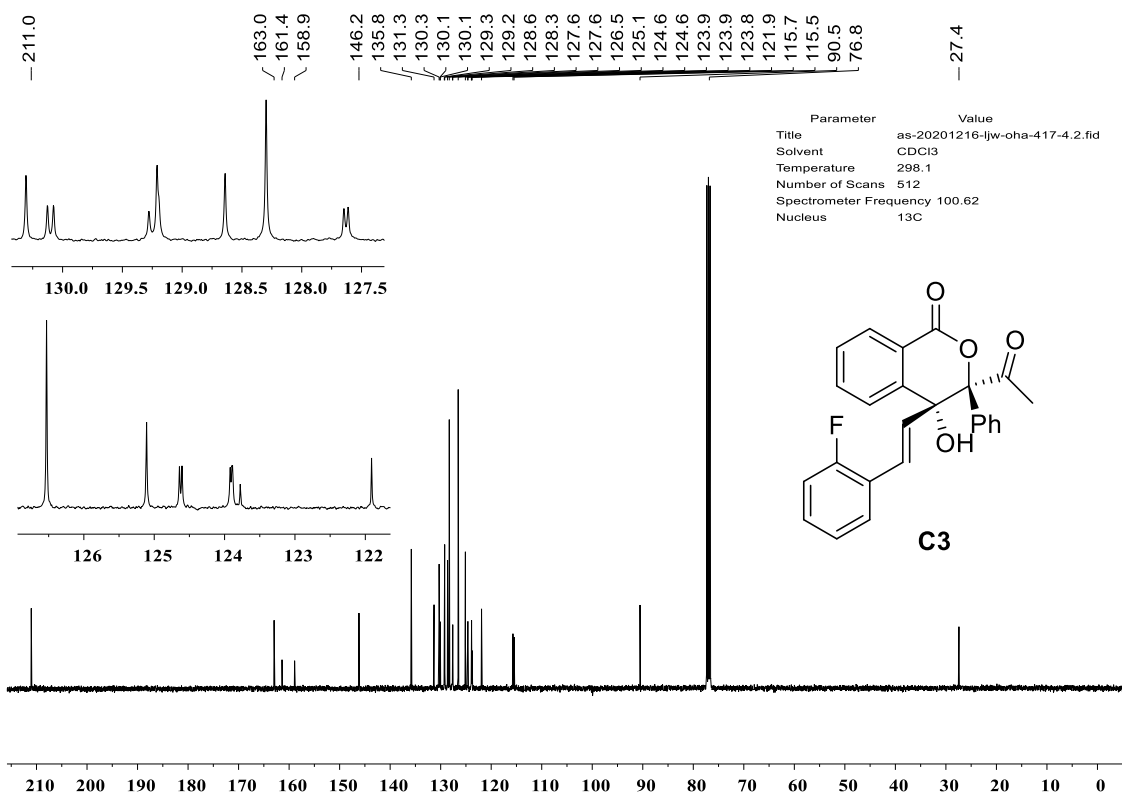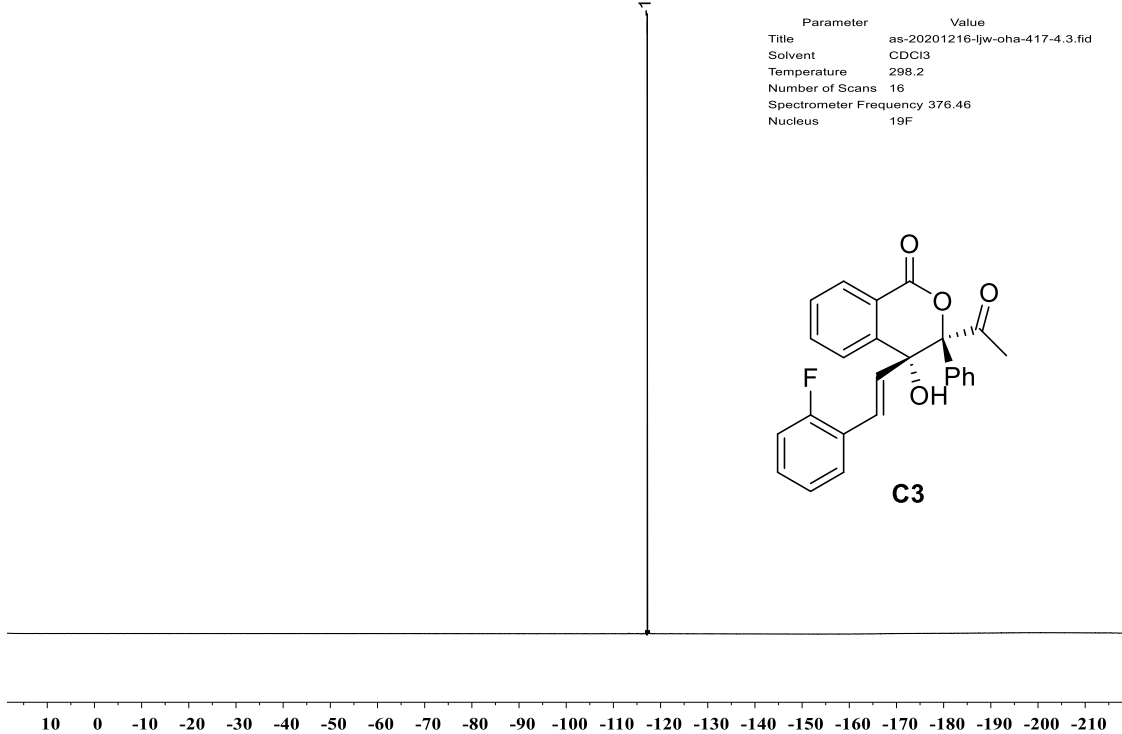

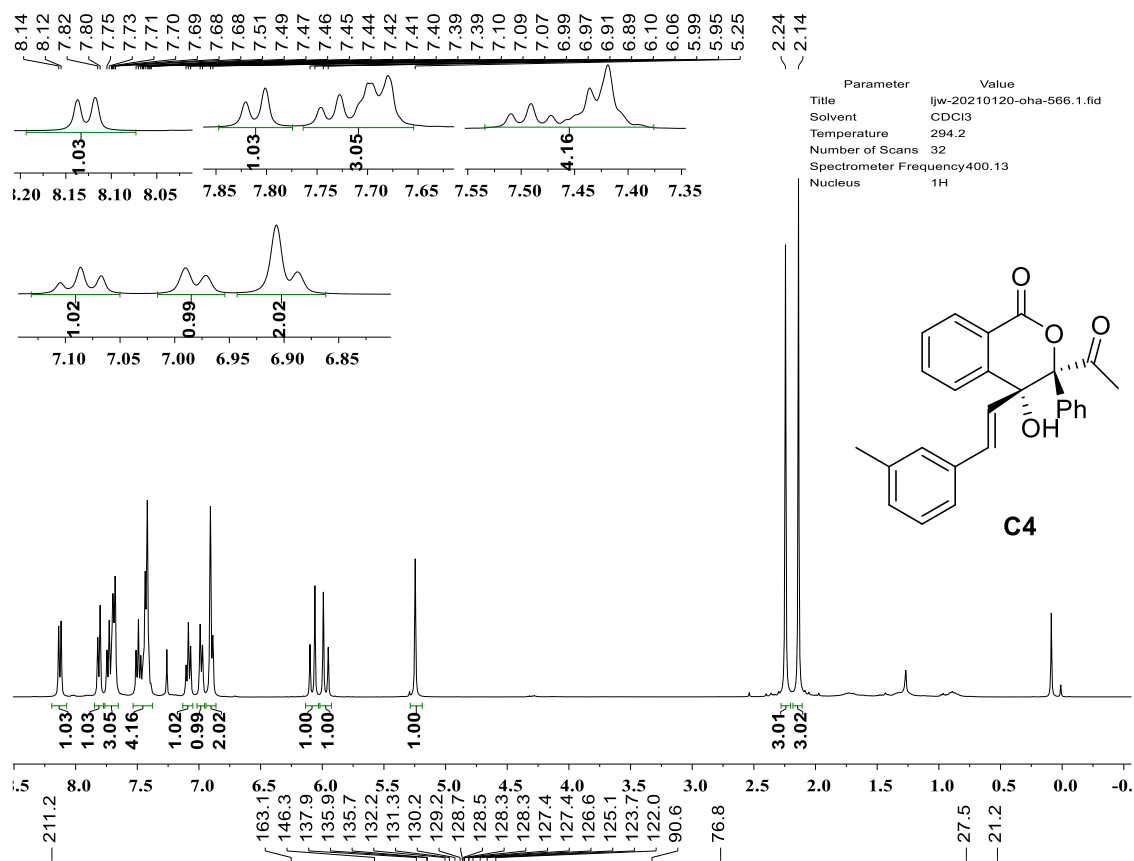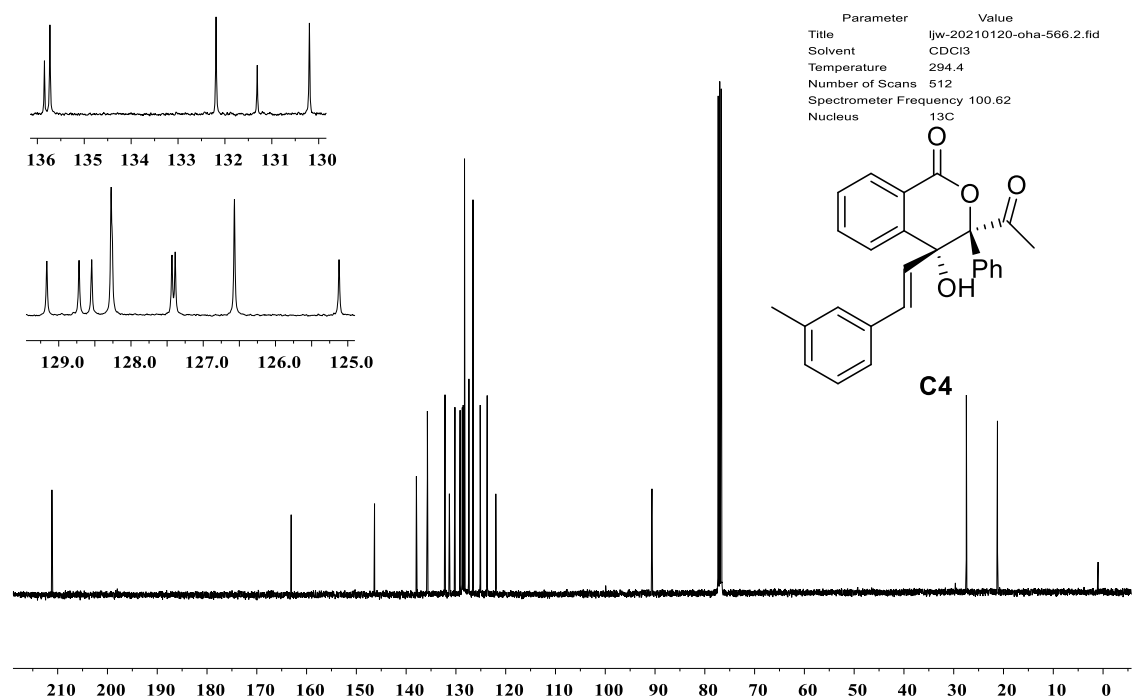

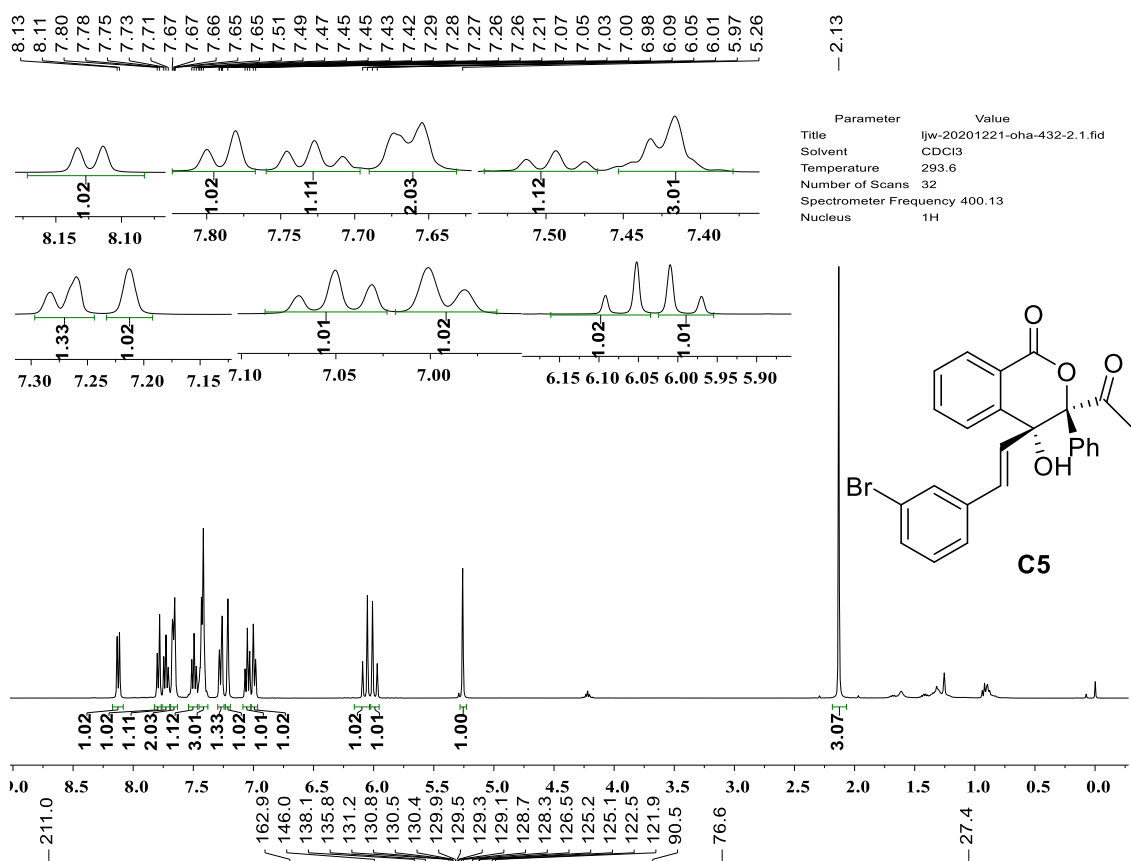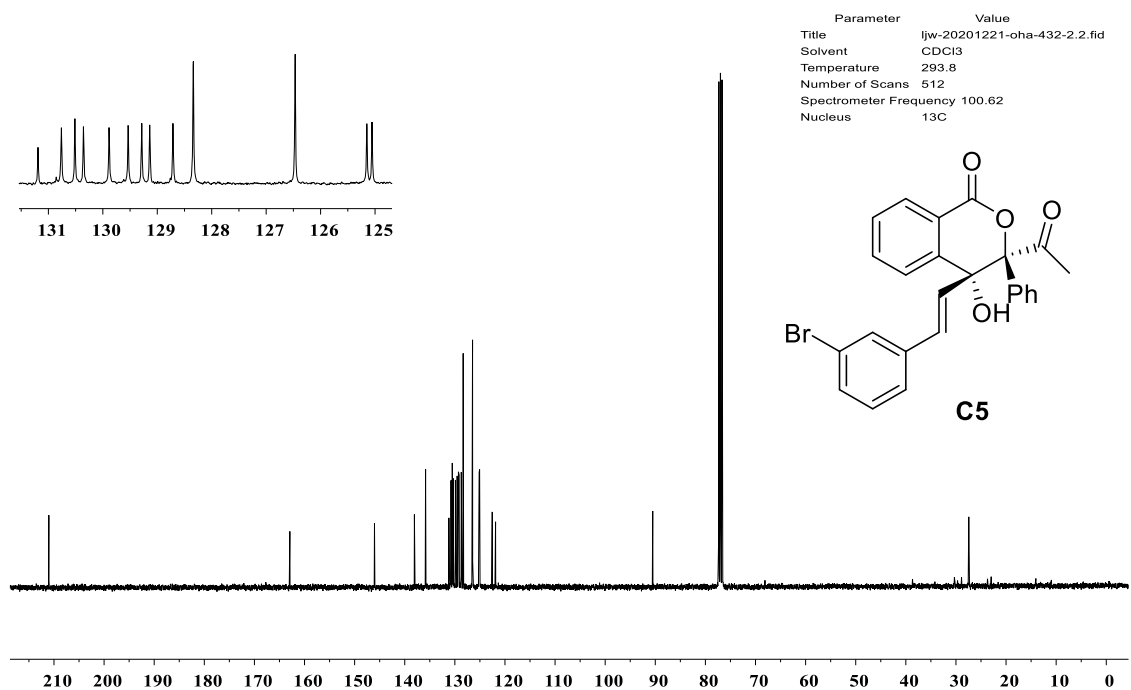

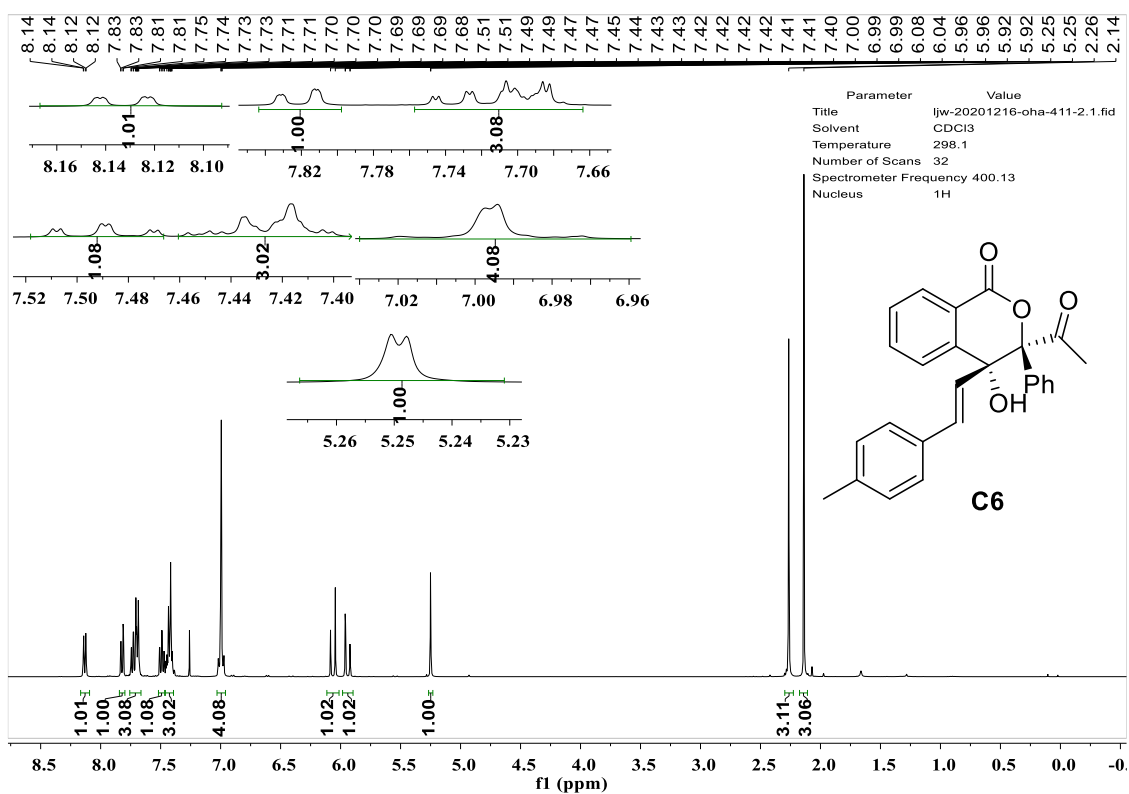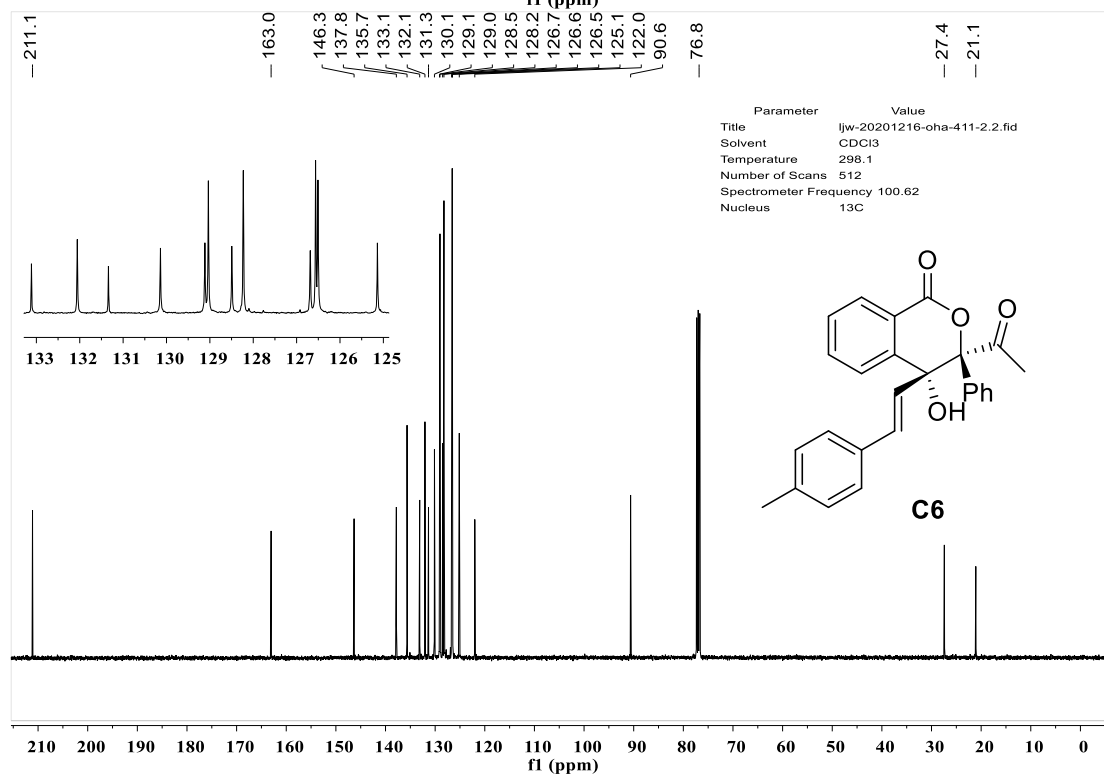

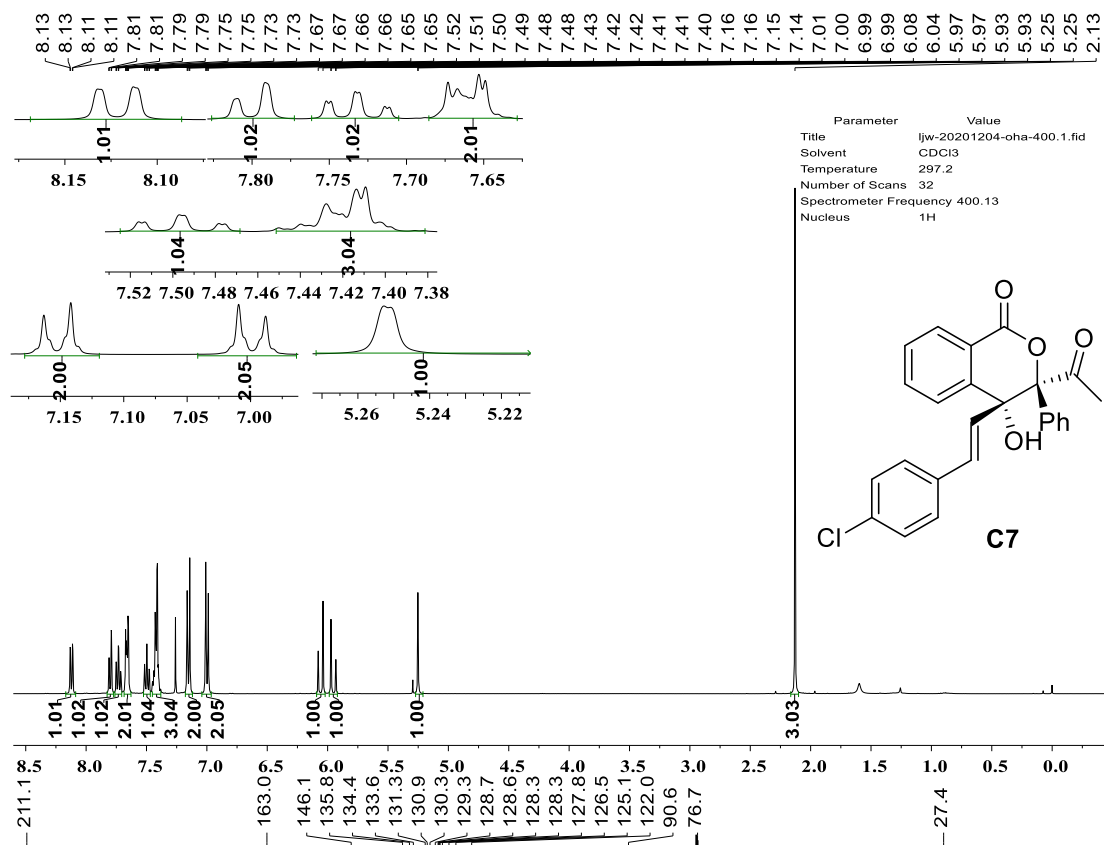

Parameter Value  
 Title ljw-20201204-oha-400.1.fid  
 Solvent CDCl<sub>3</sub>  
 Temperature 297.2  
 Number of Scans 32  
 Spectrometer Frequency 400.13  
 Nucleus <sup>1</sup>H

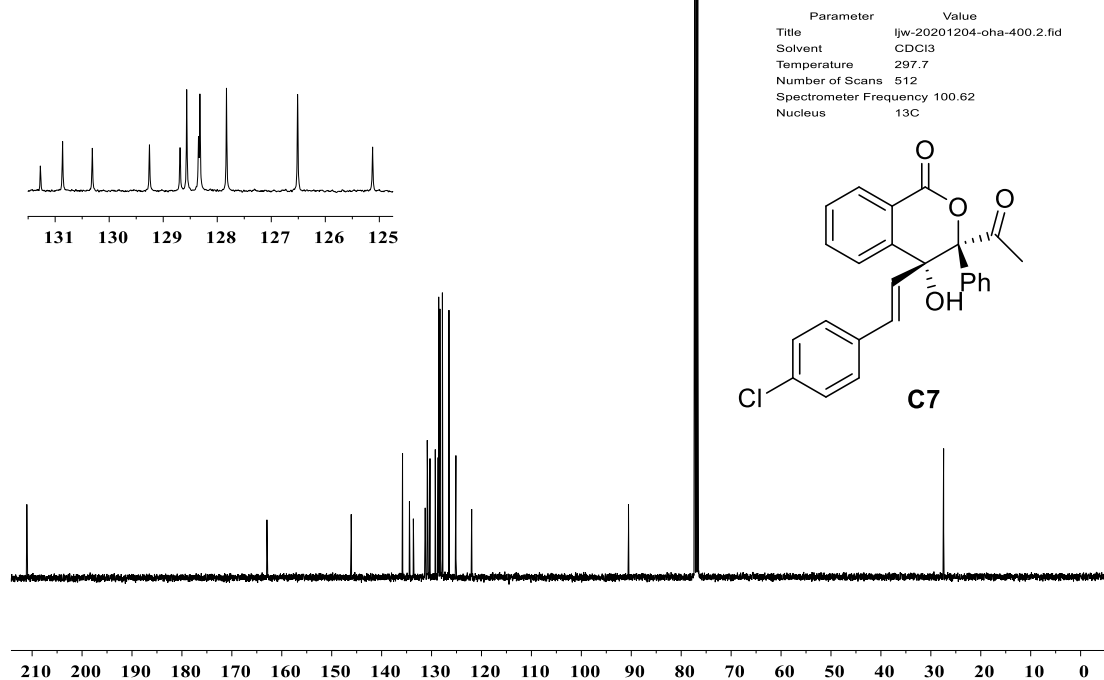

Parameter Value  
 Title ljw-20201204-oha-400.2.fid  
 Solvent CDCl<sub>3</sub>  
 Temperature 297.7  
 Number of Scans 512  
 Spectrometer Frequency 100.62  
 Nucleus <sup>13</sup>C

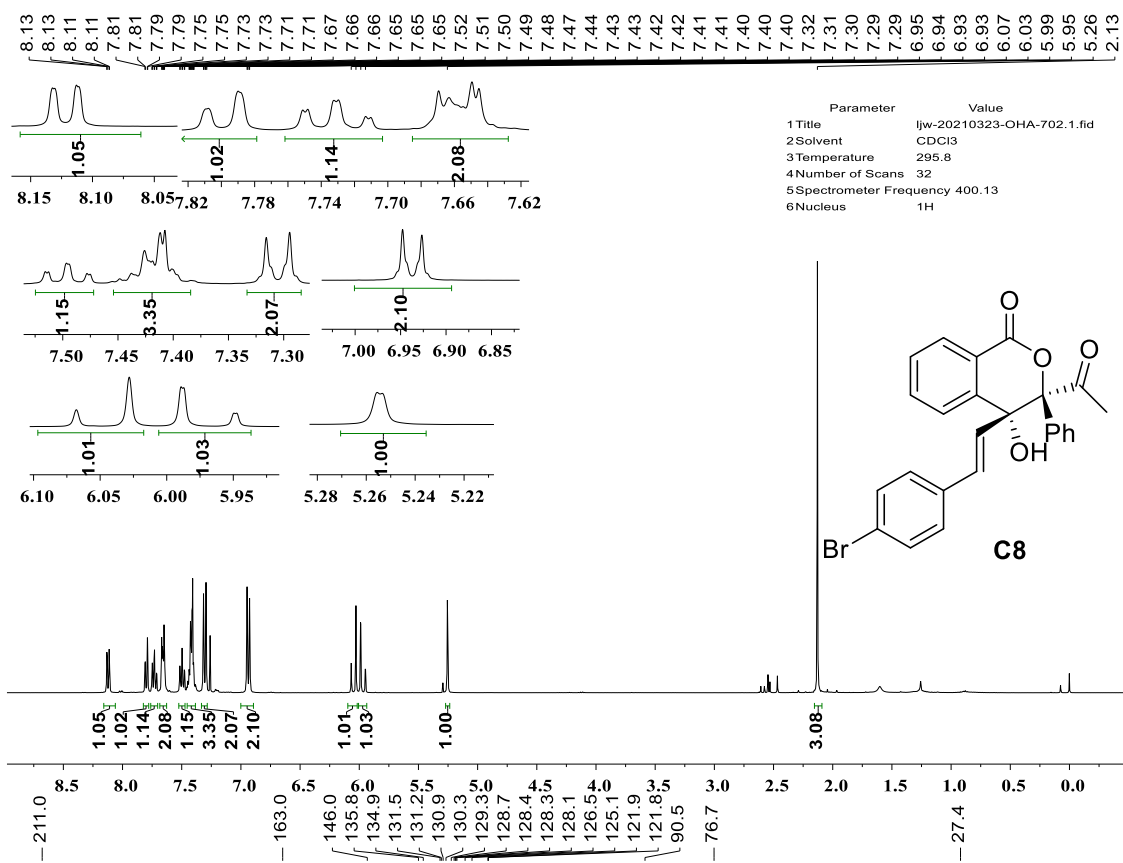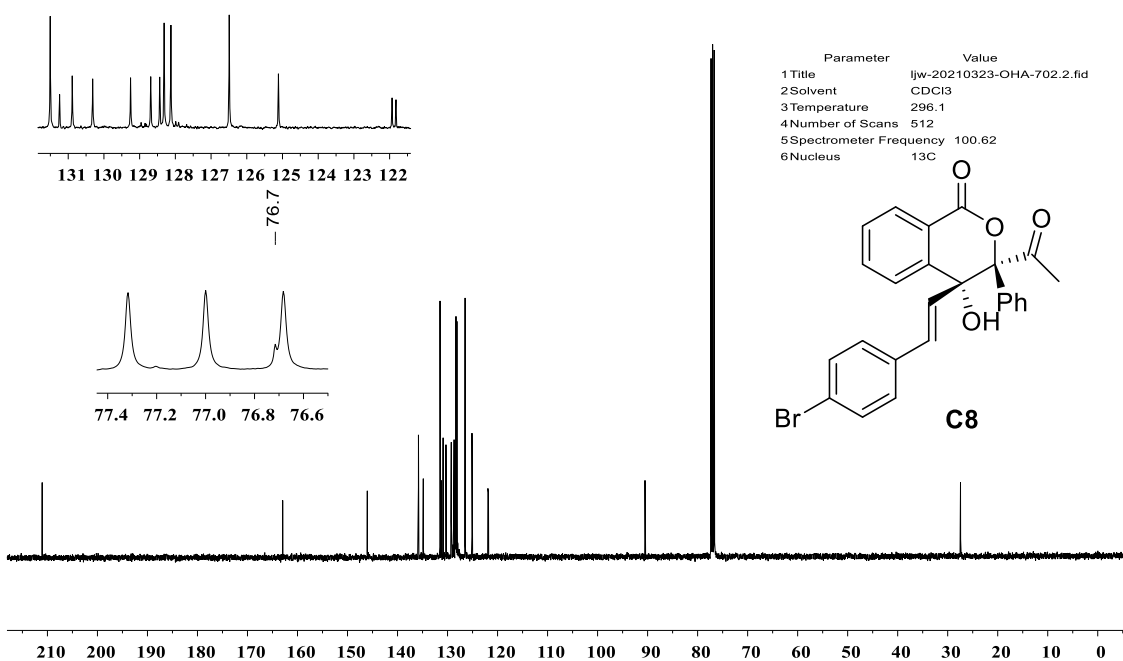

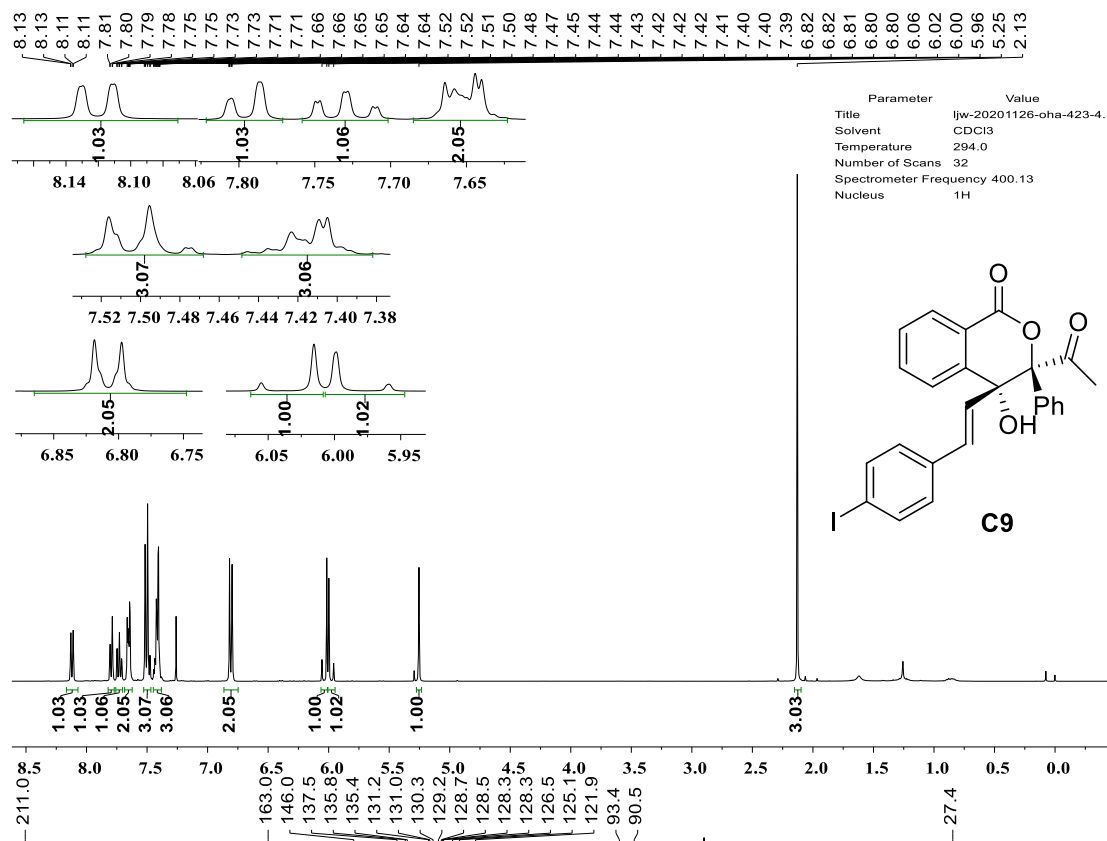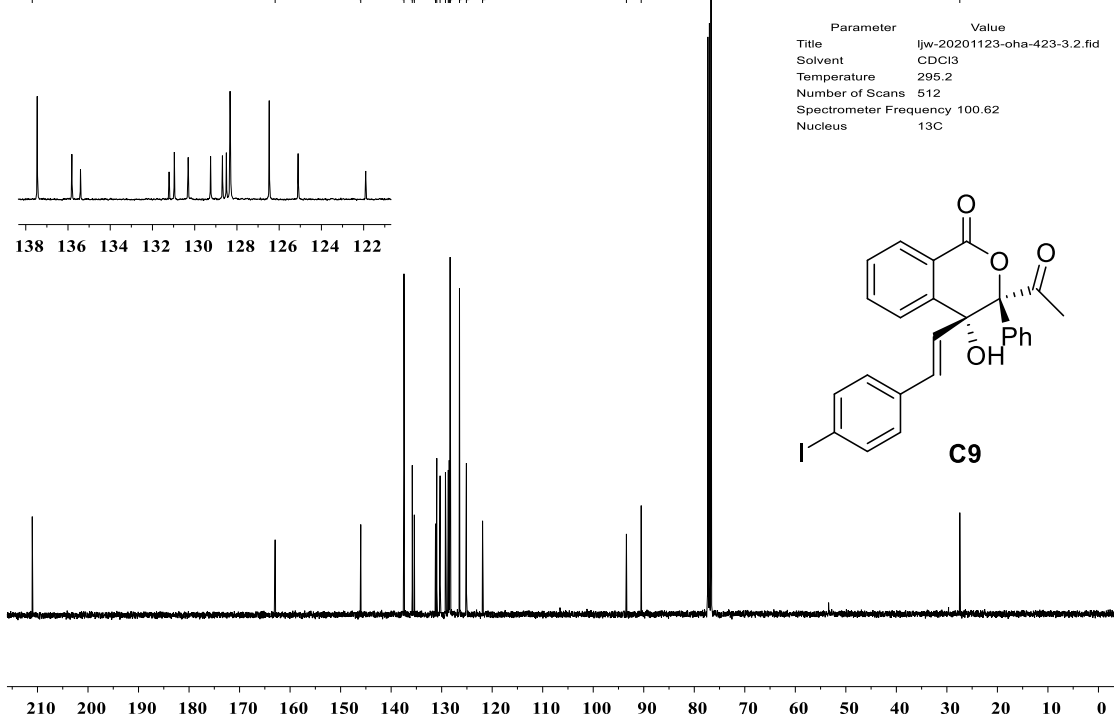

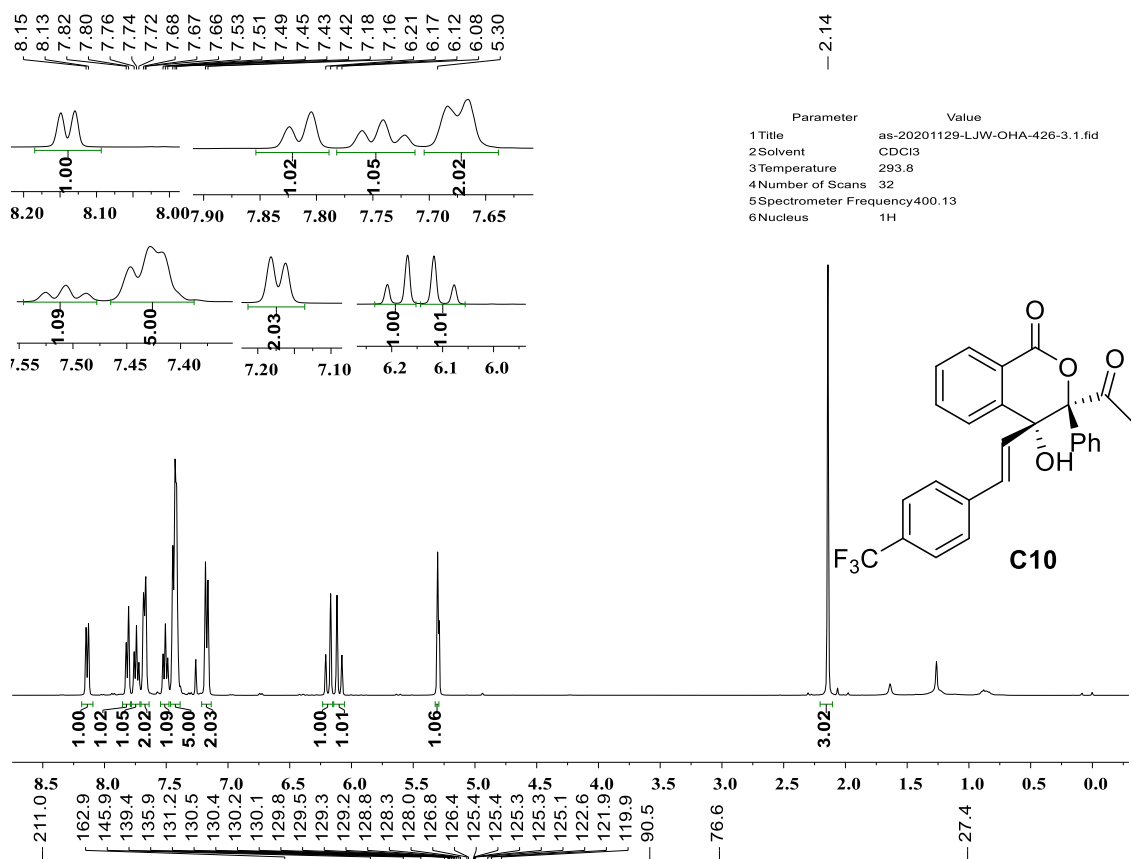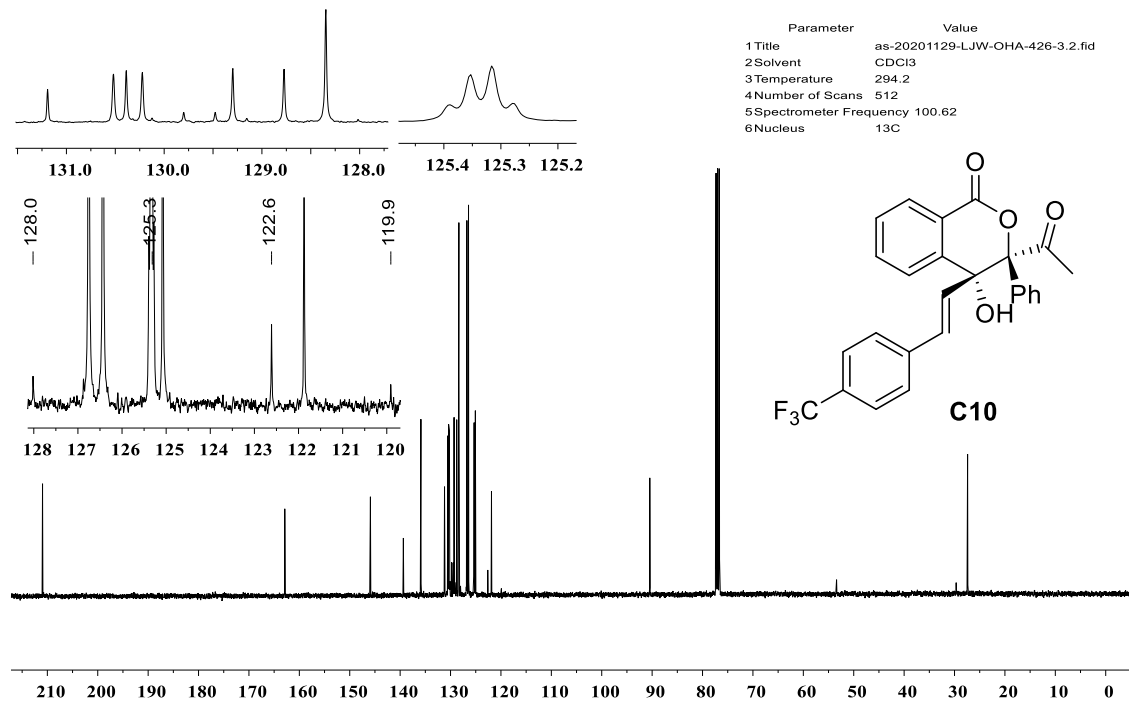



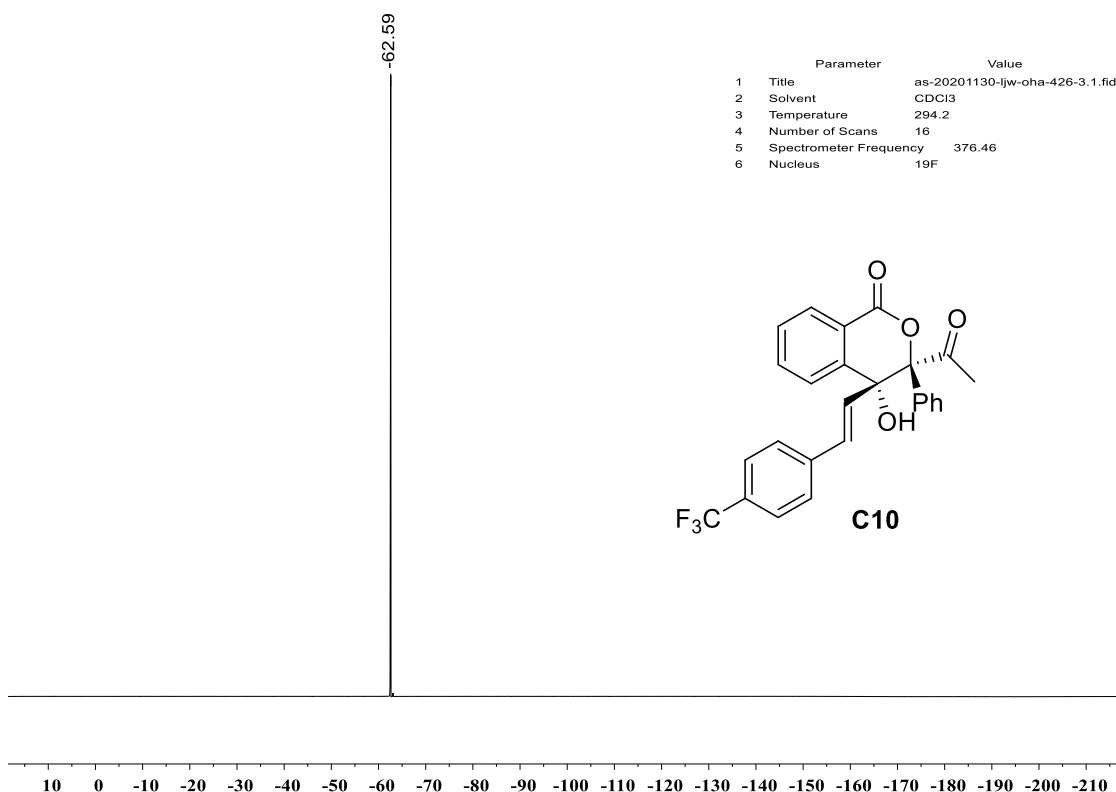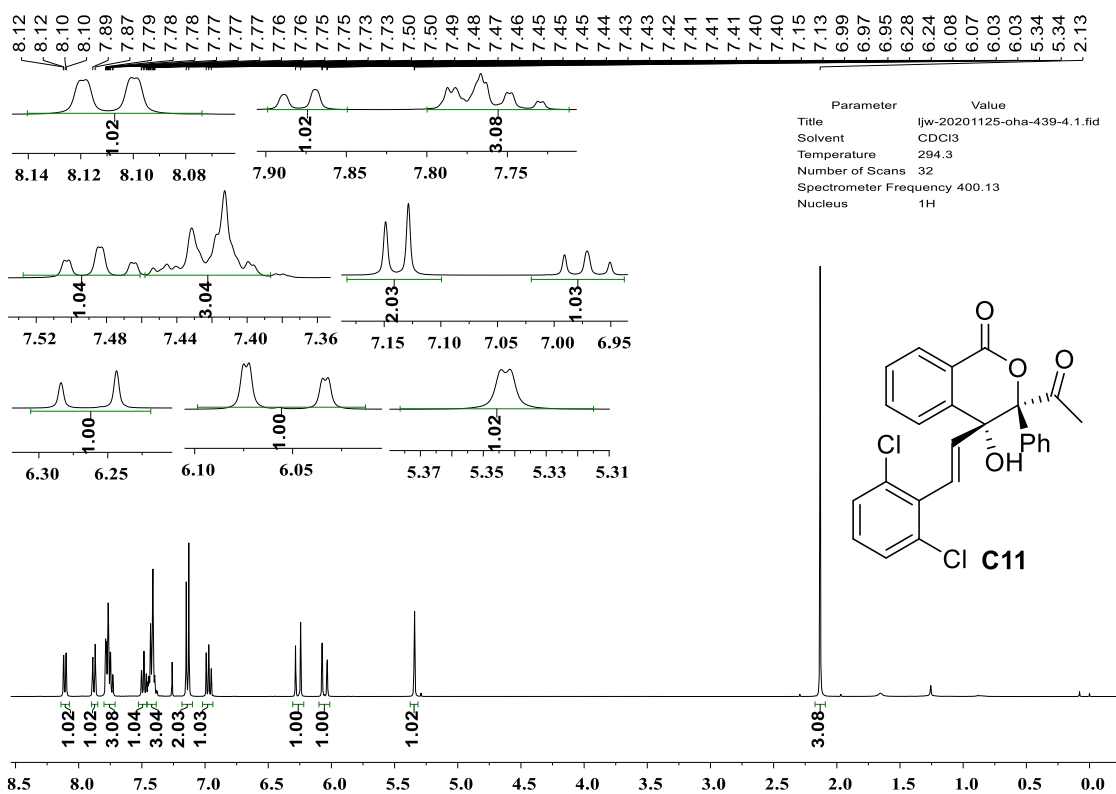

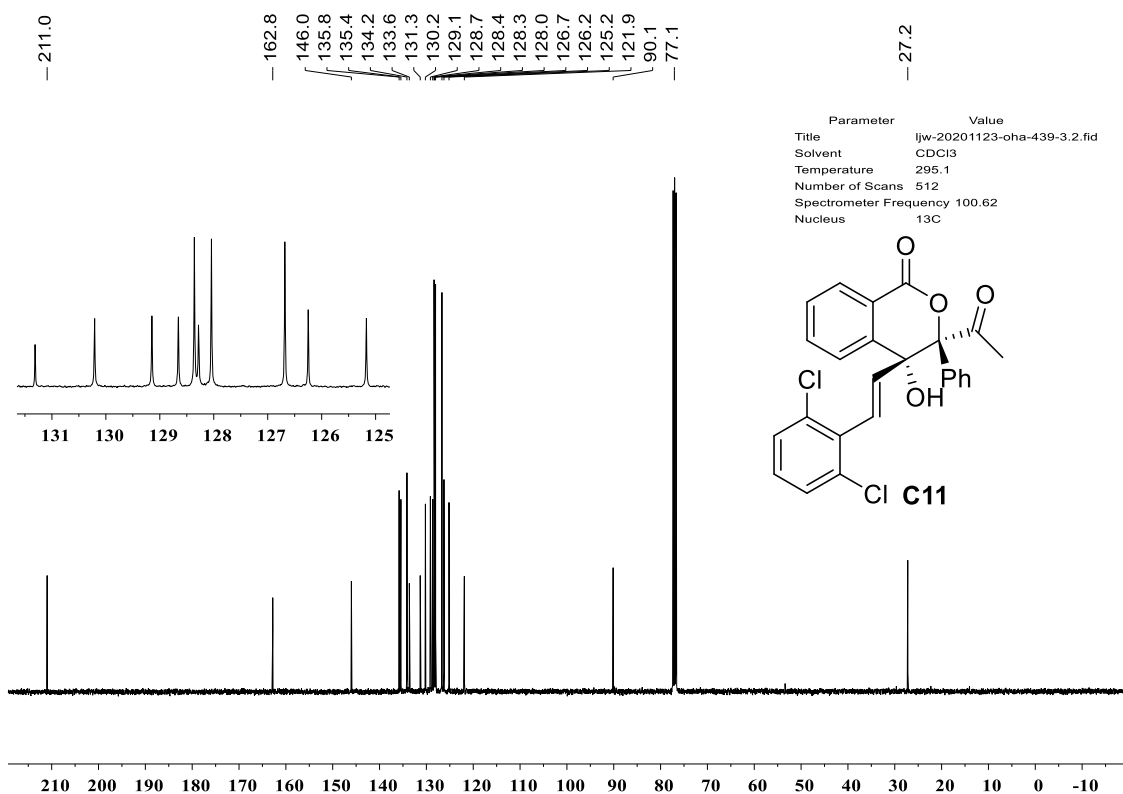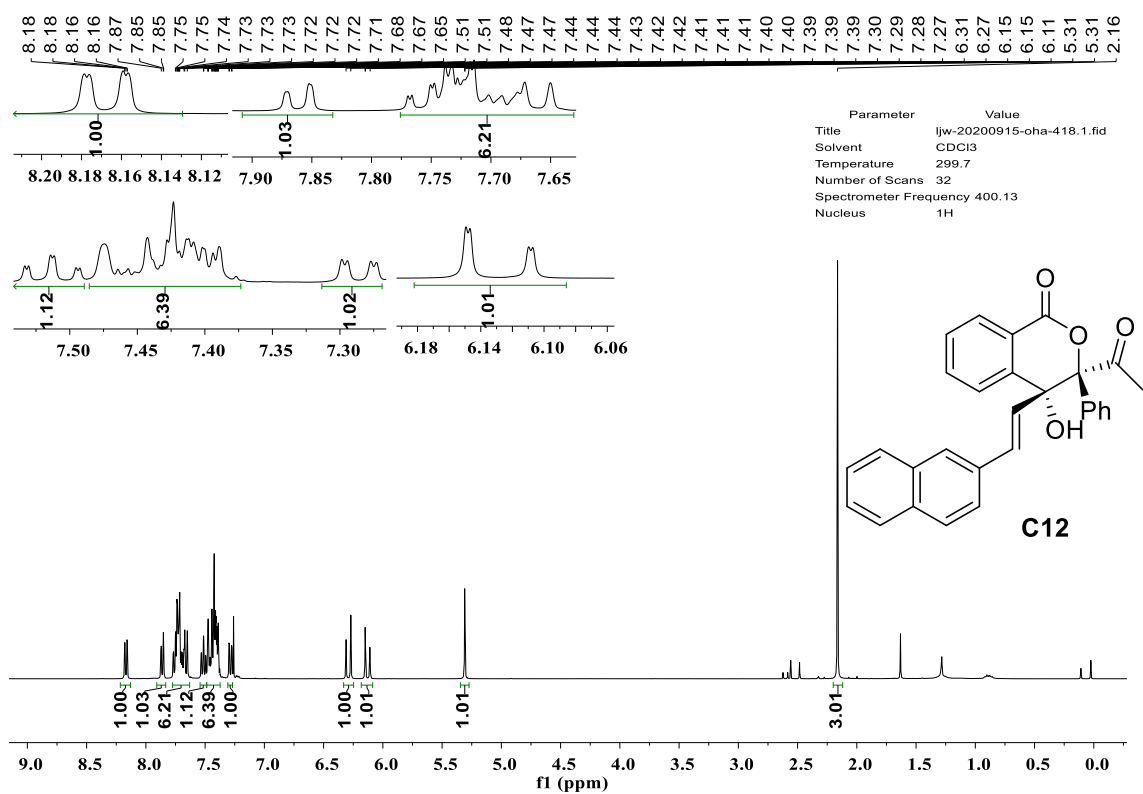

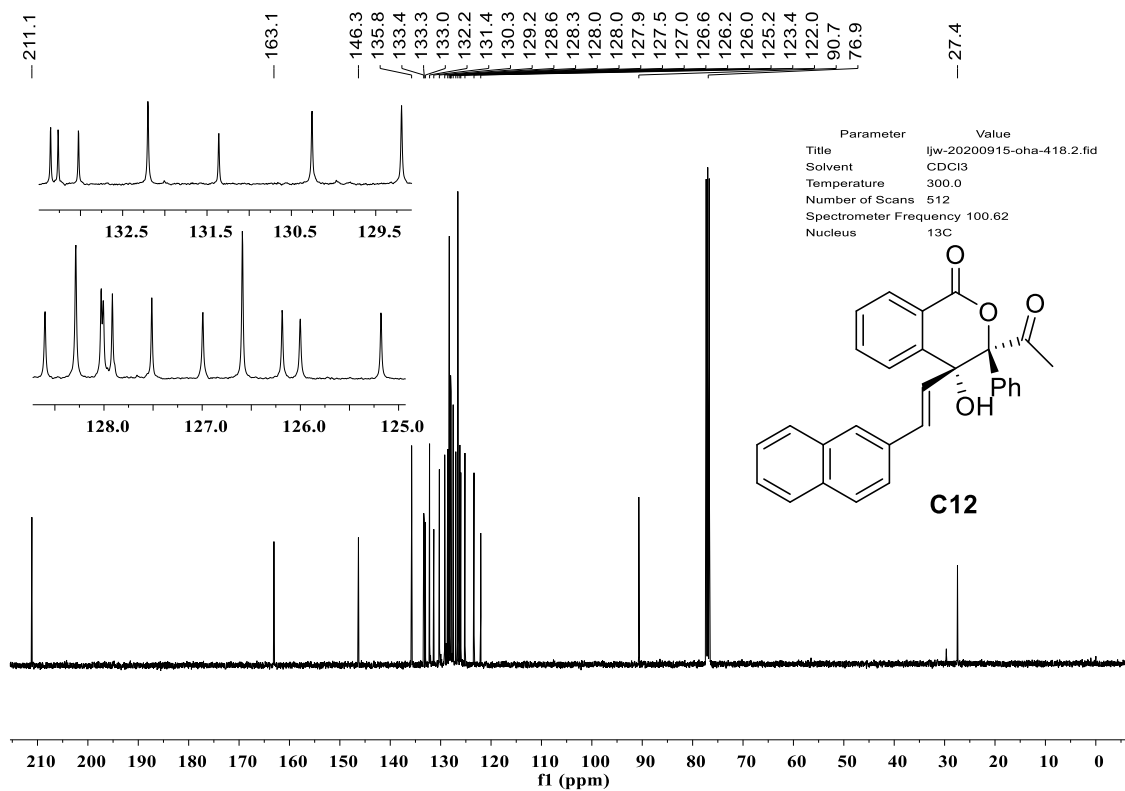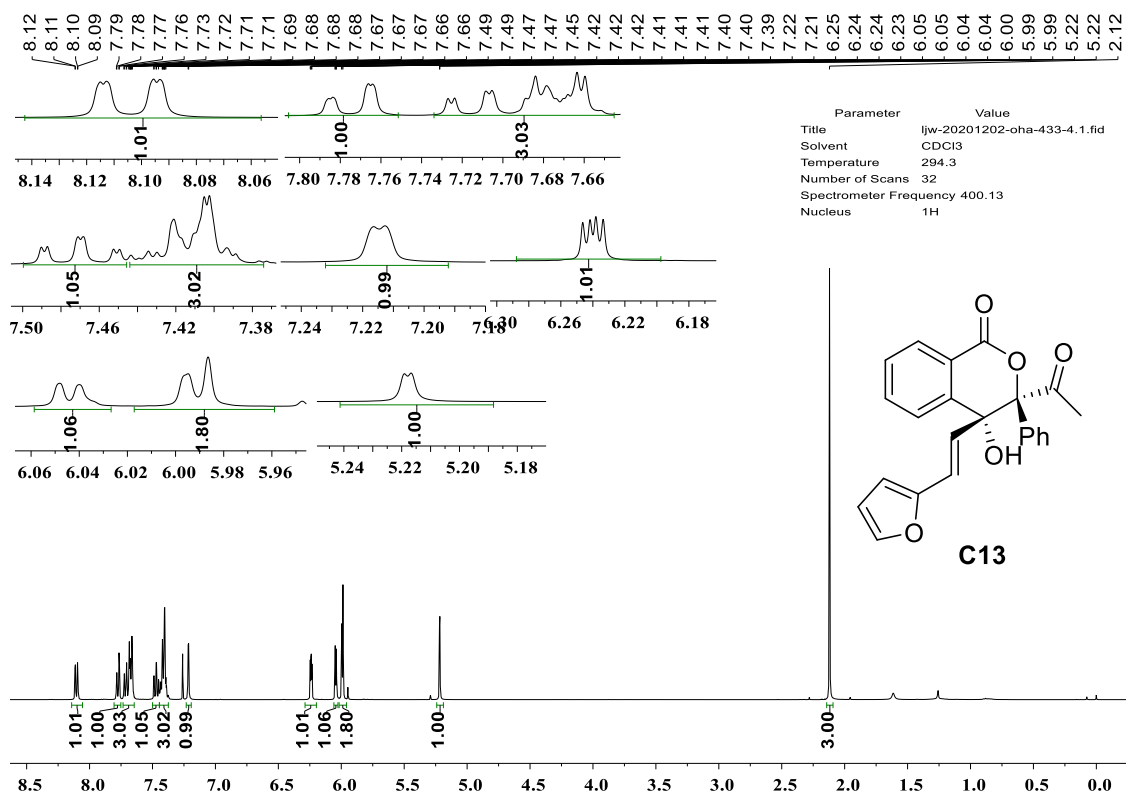

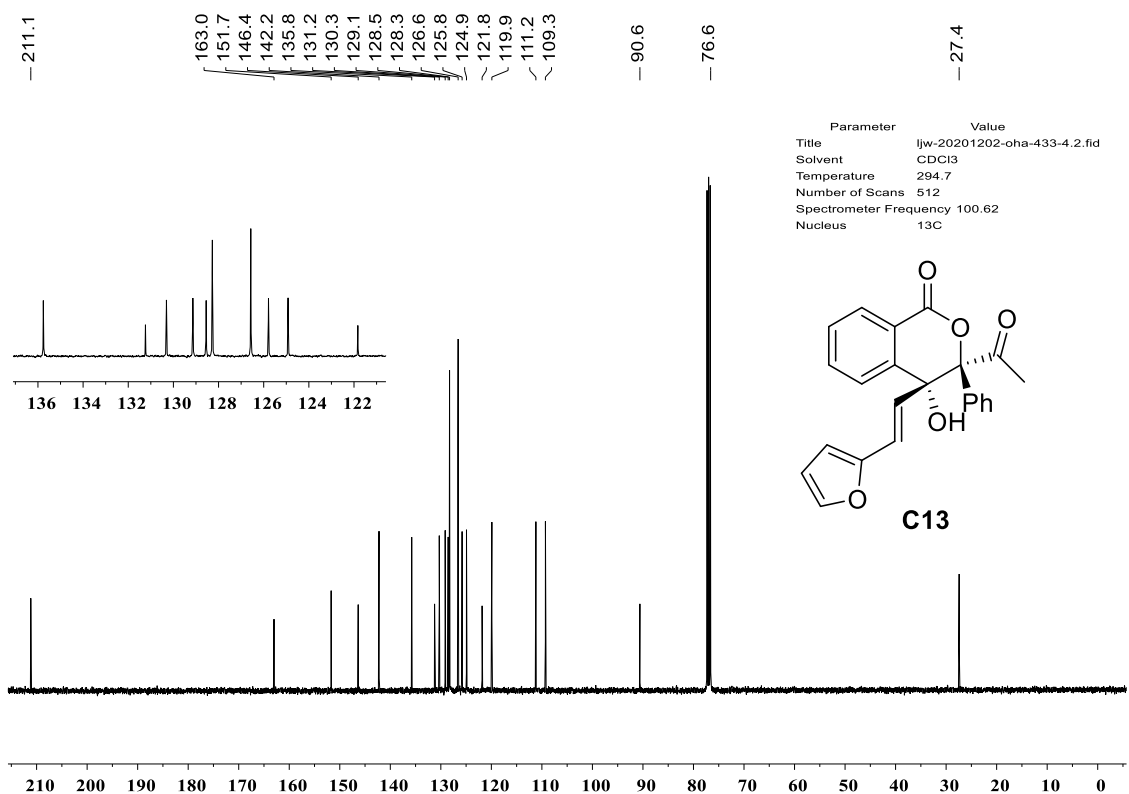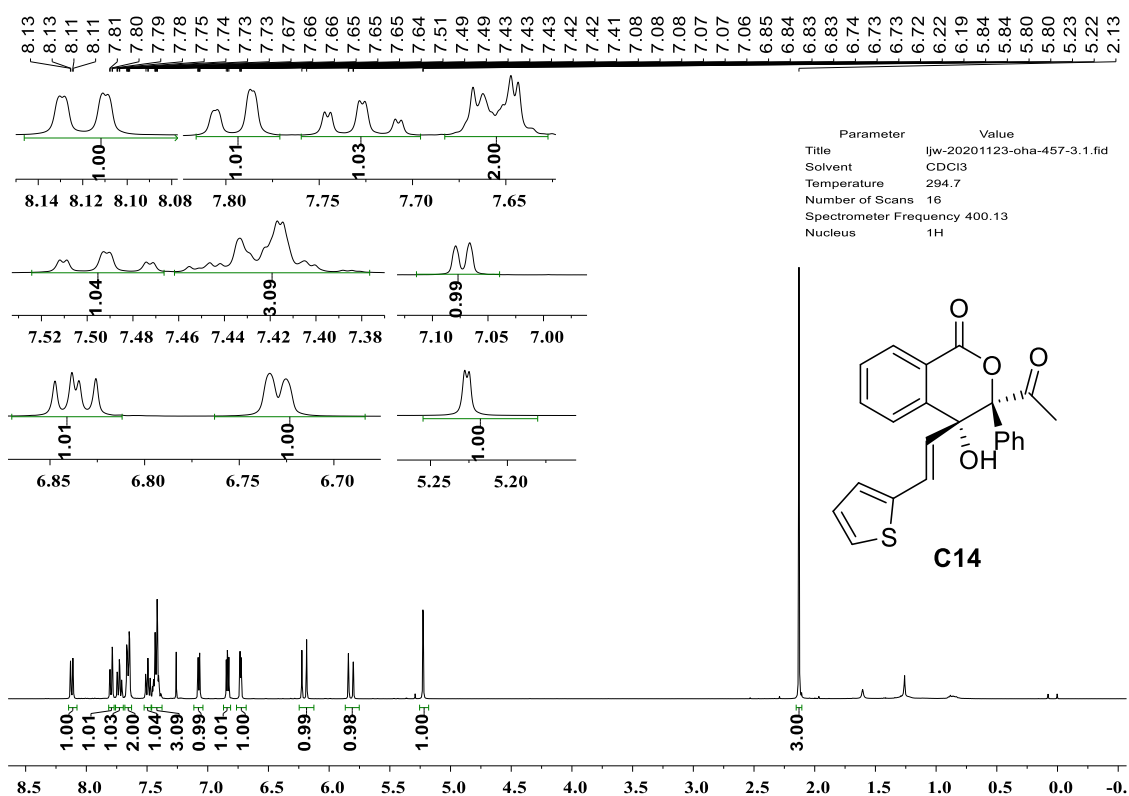

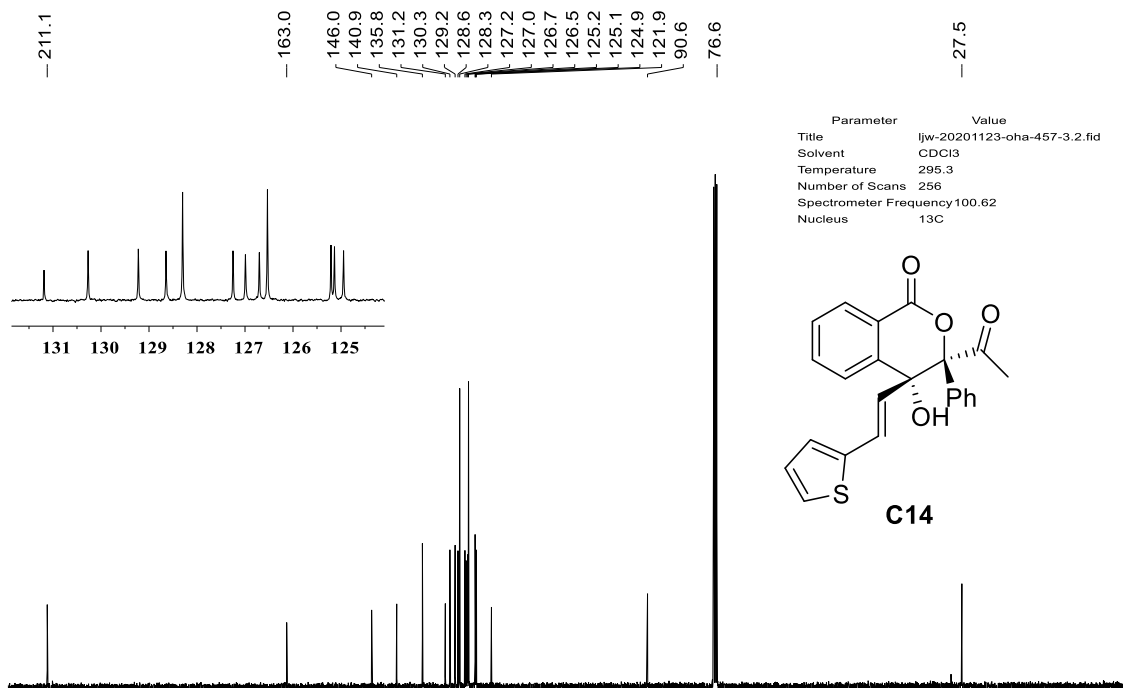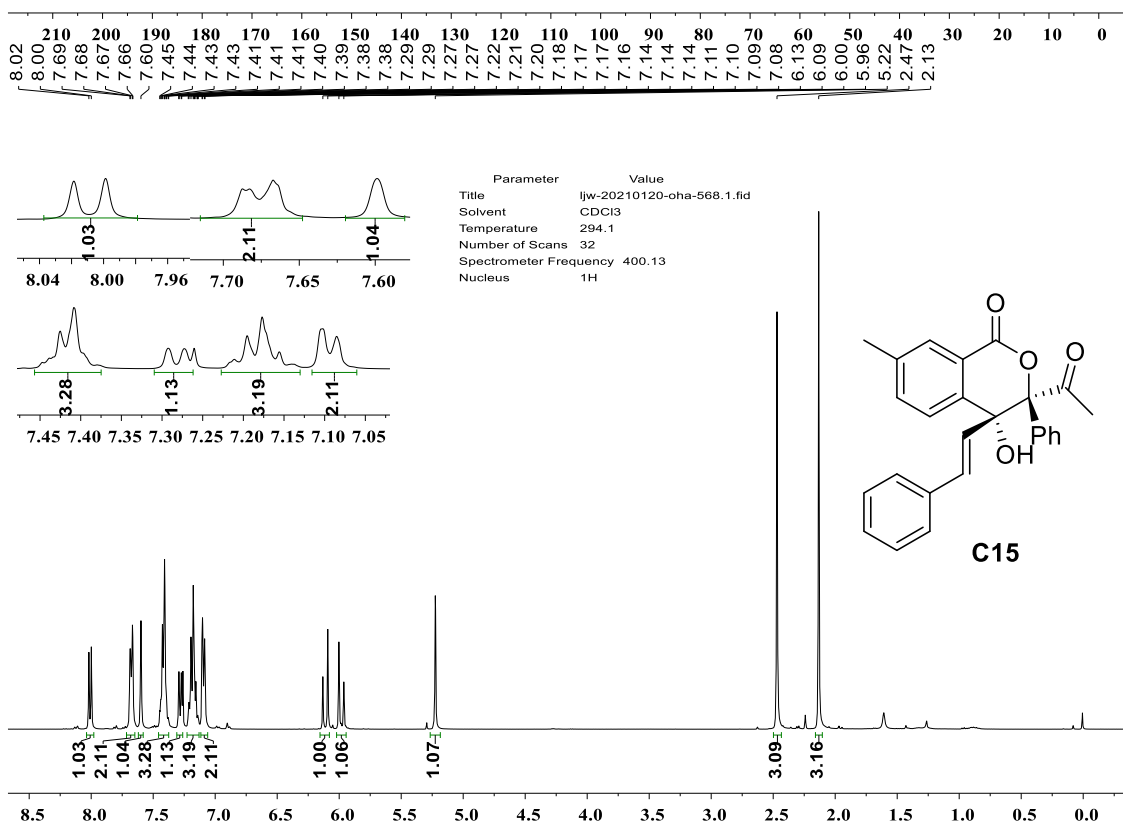

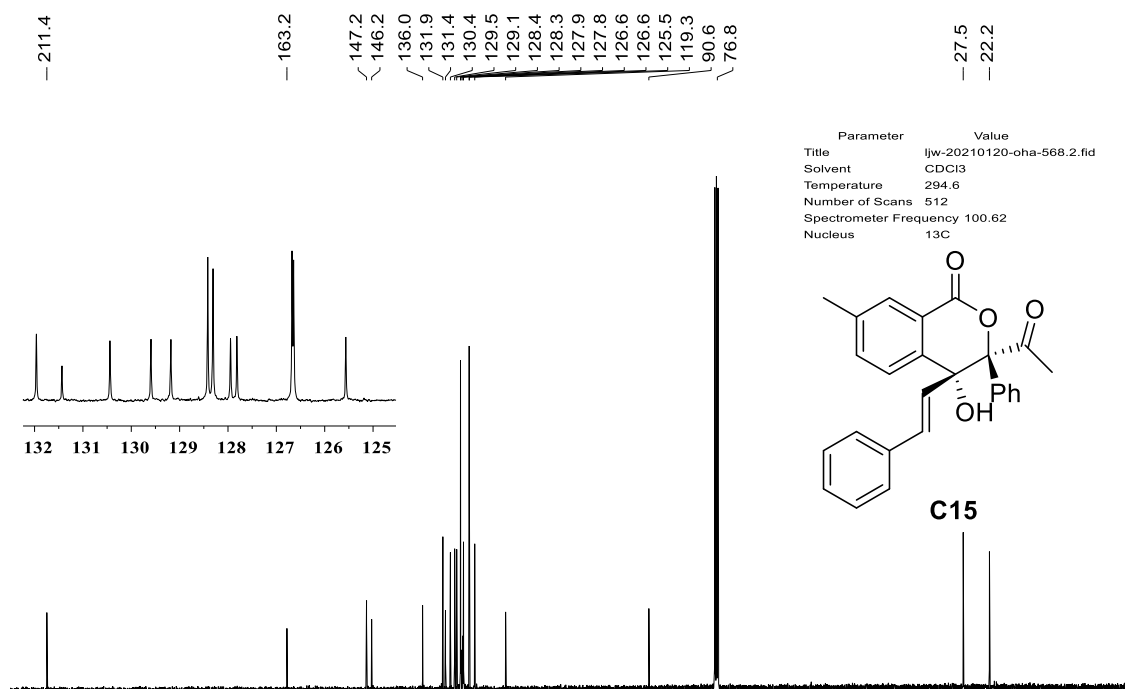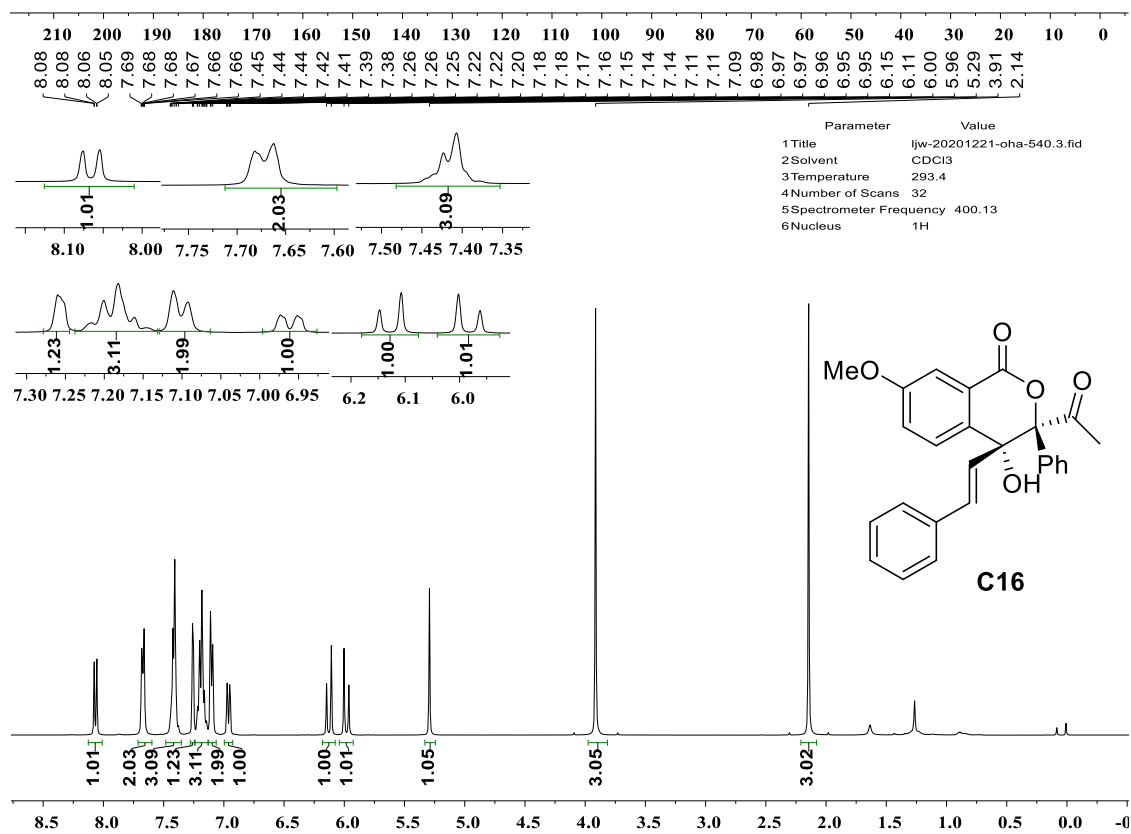

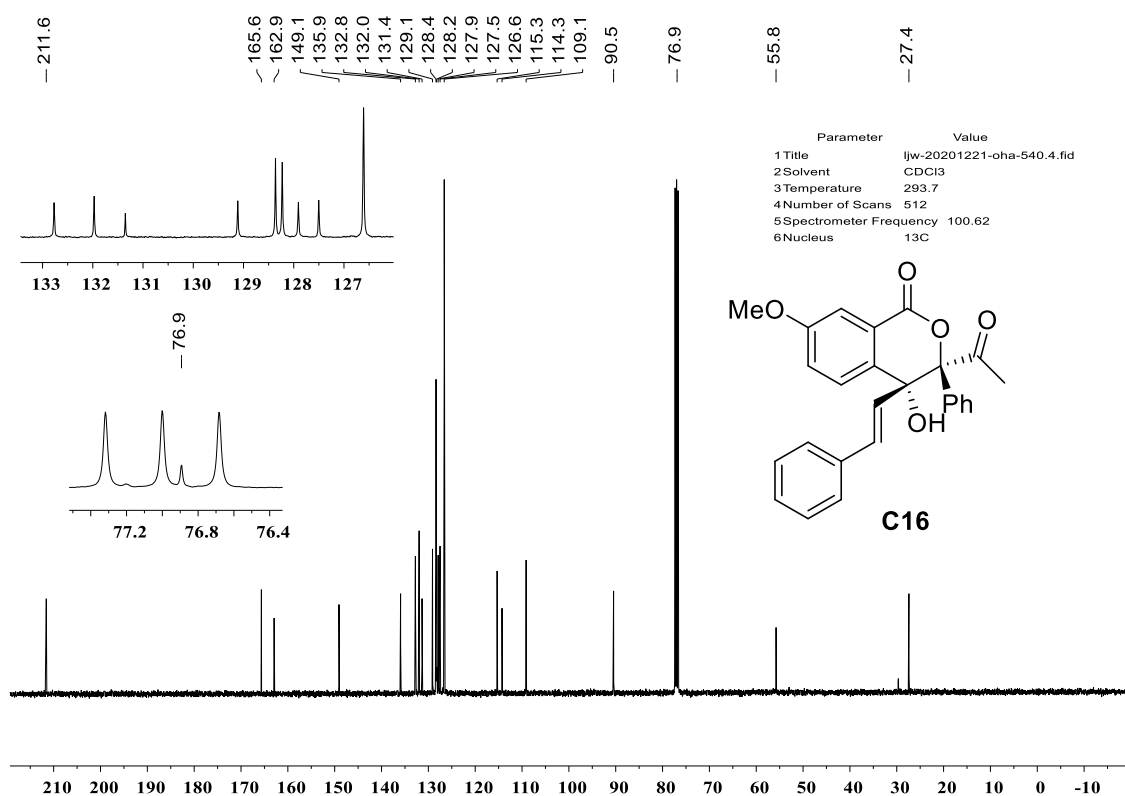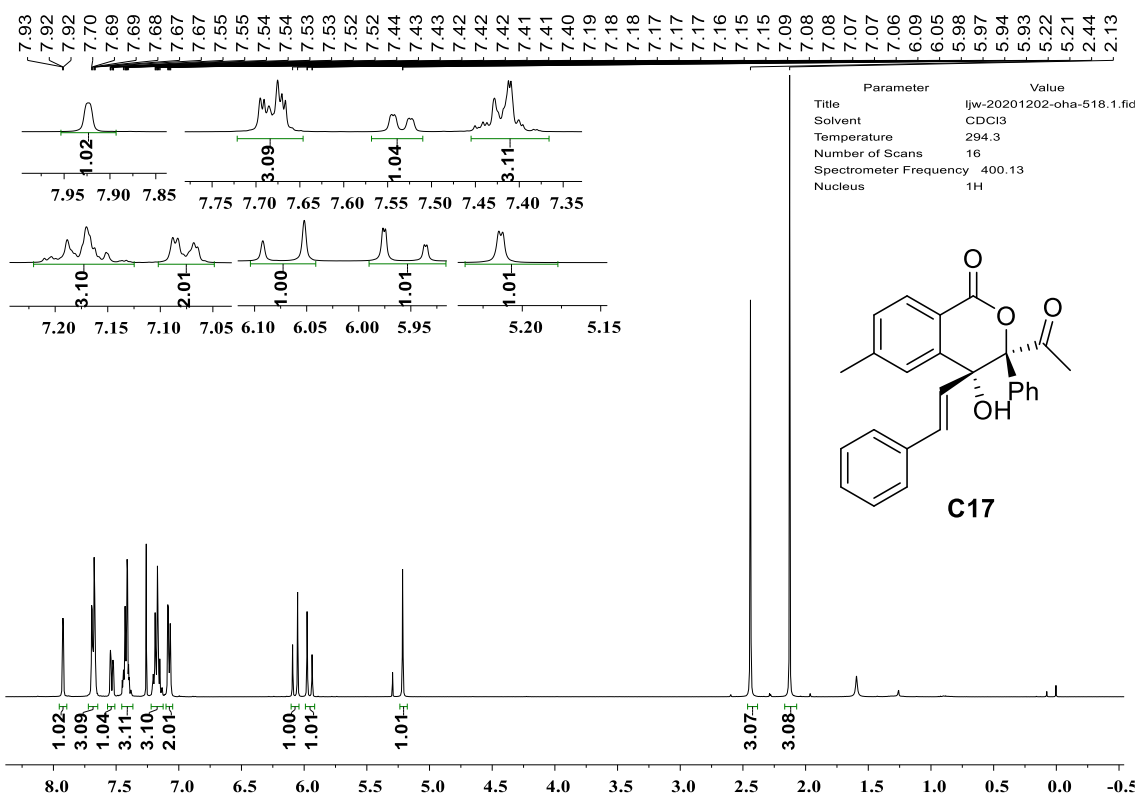

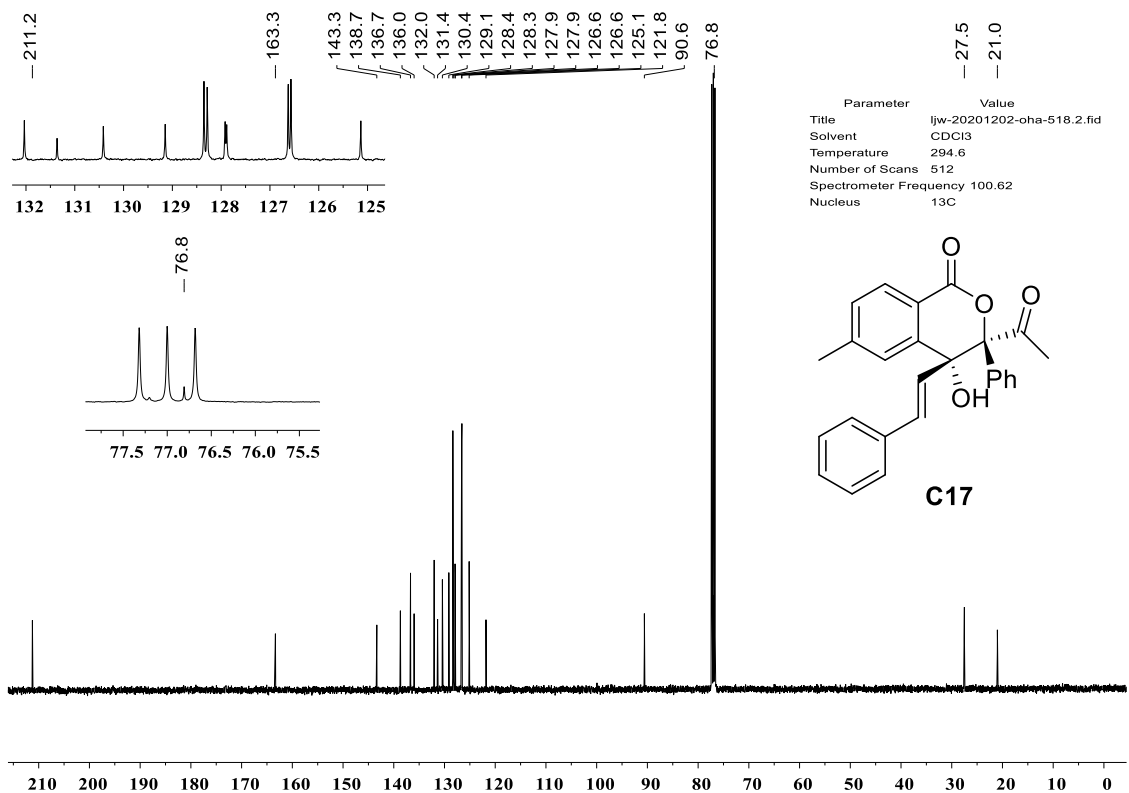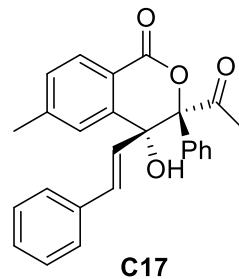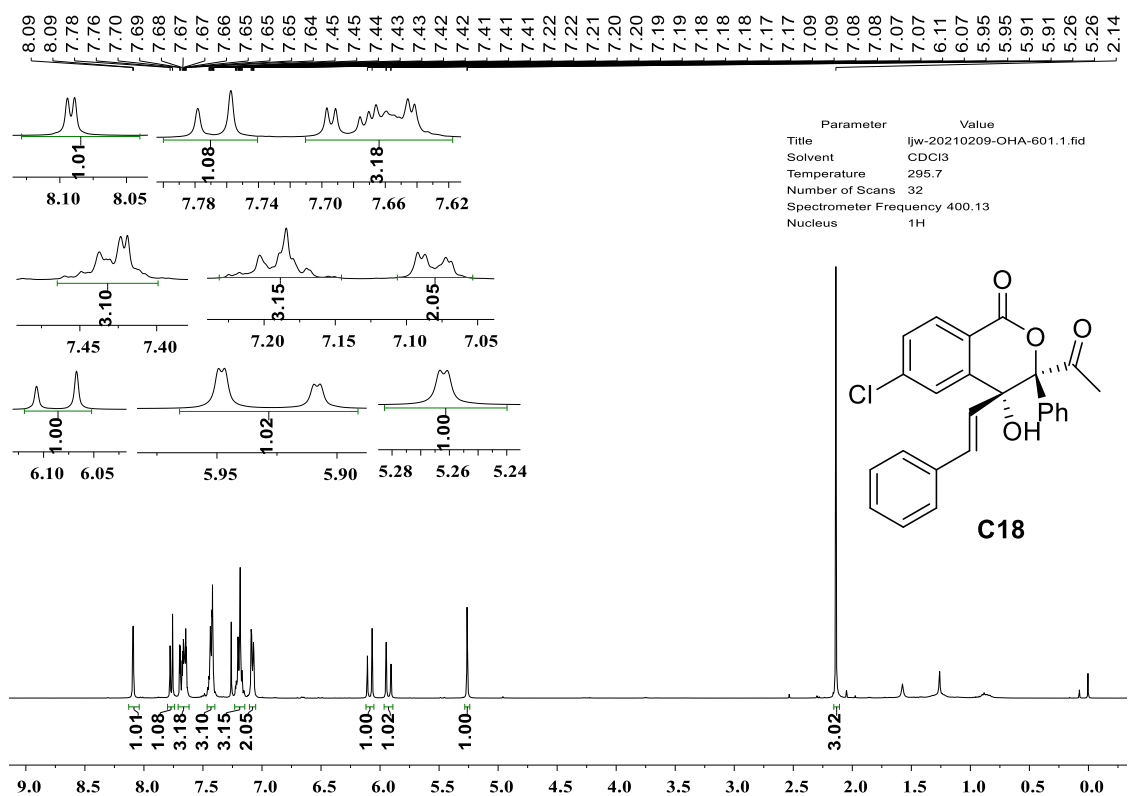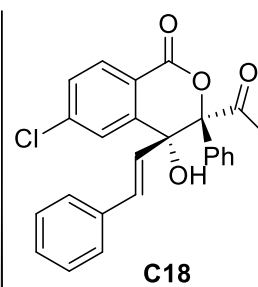



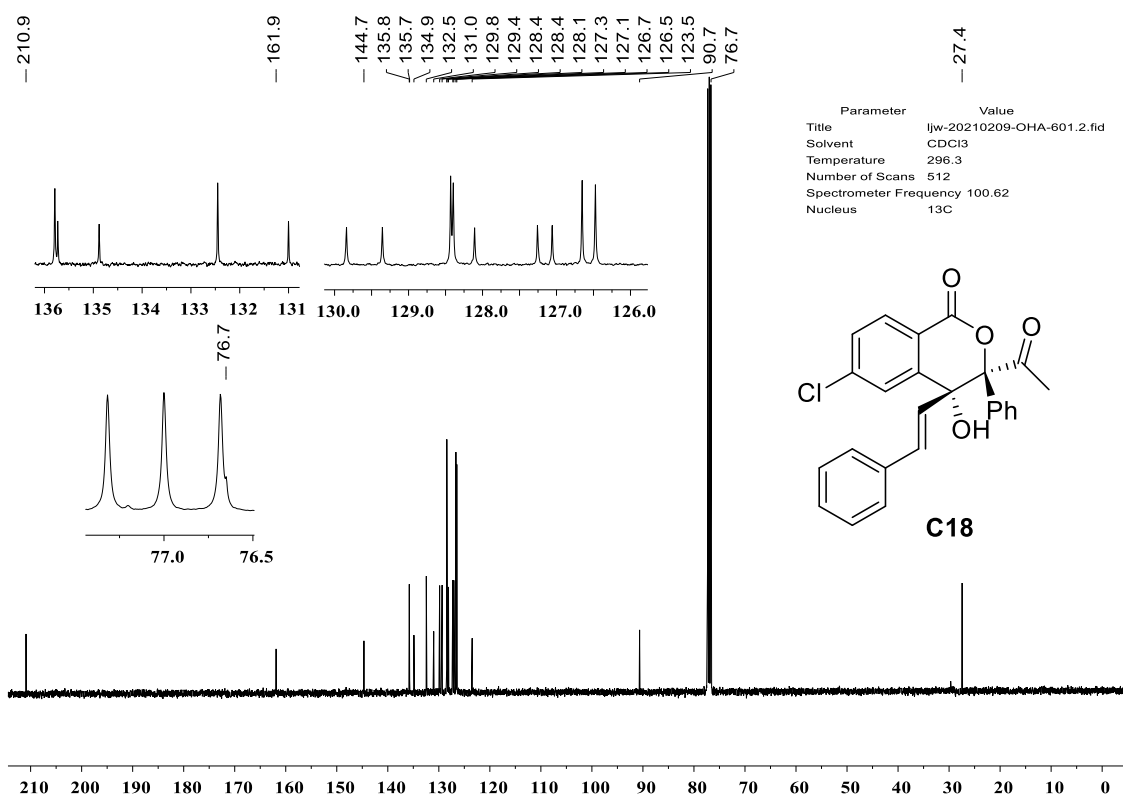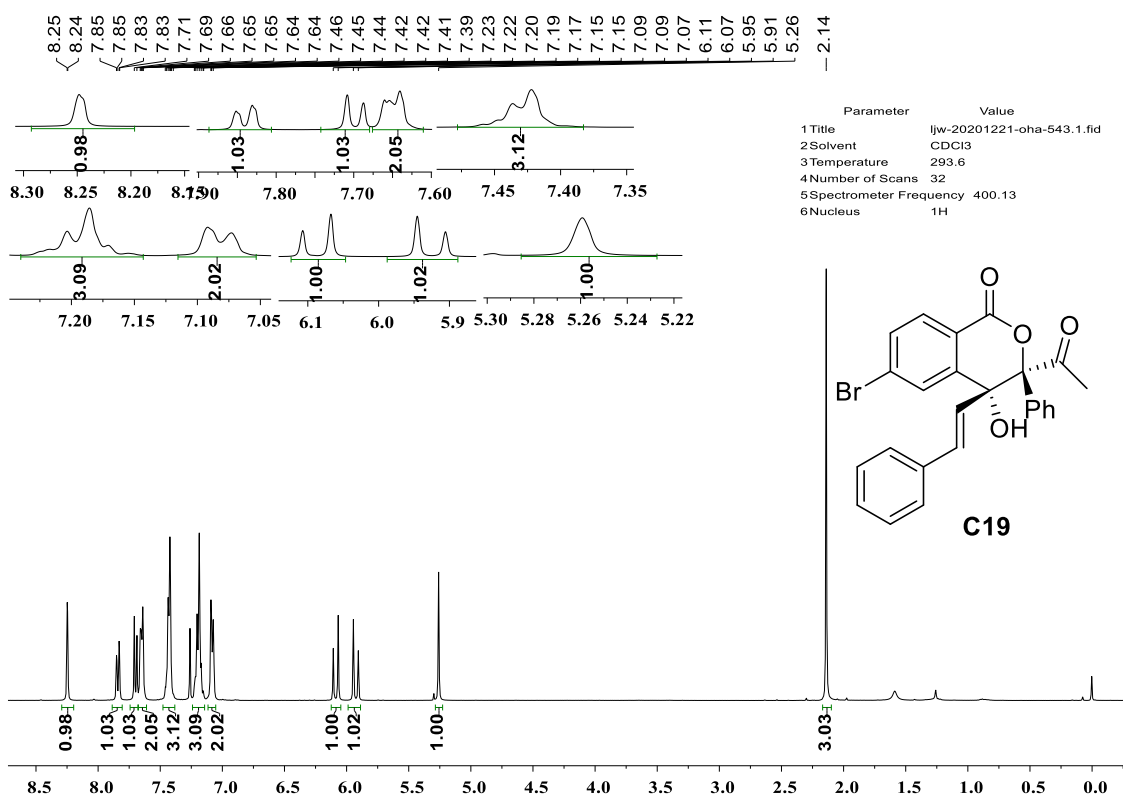

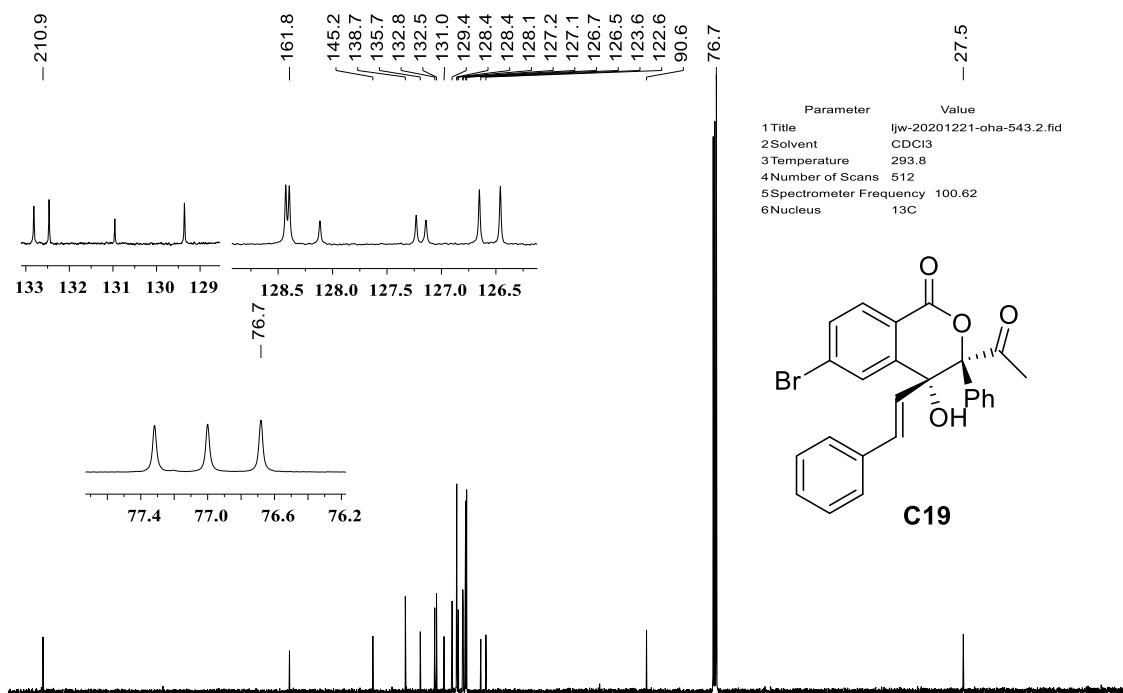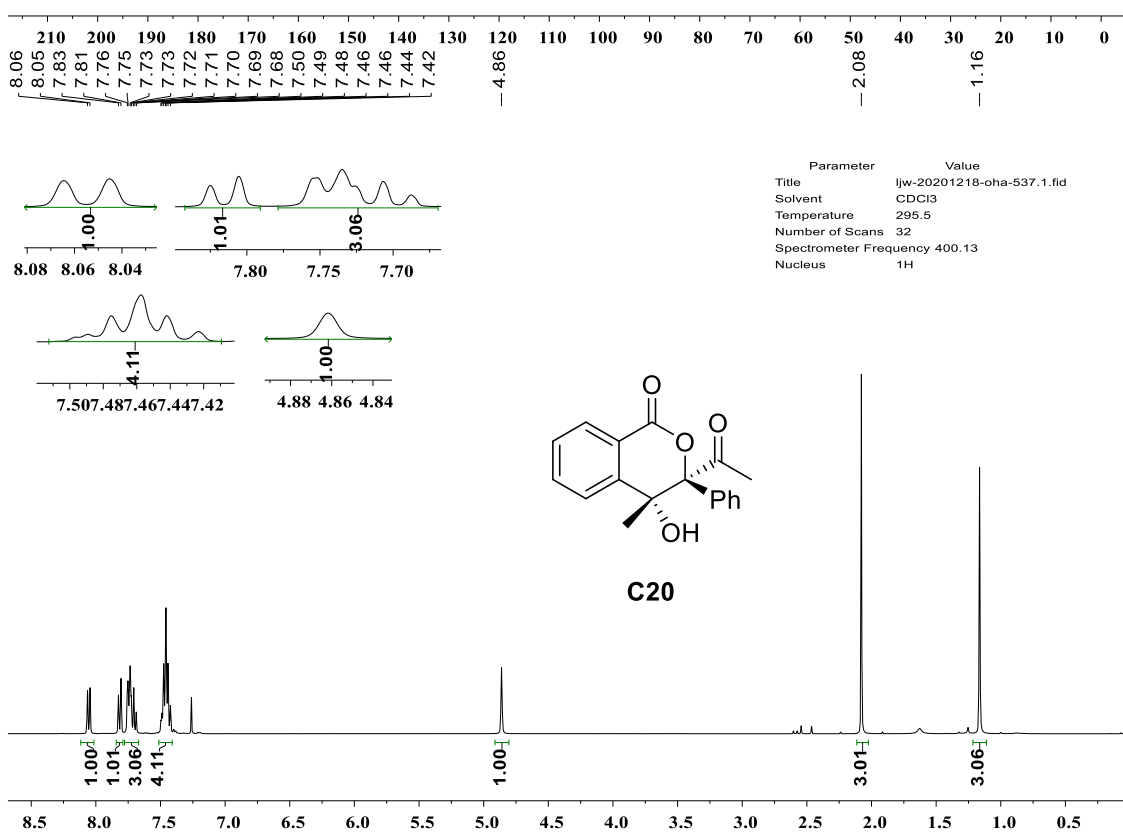

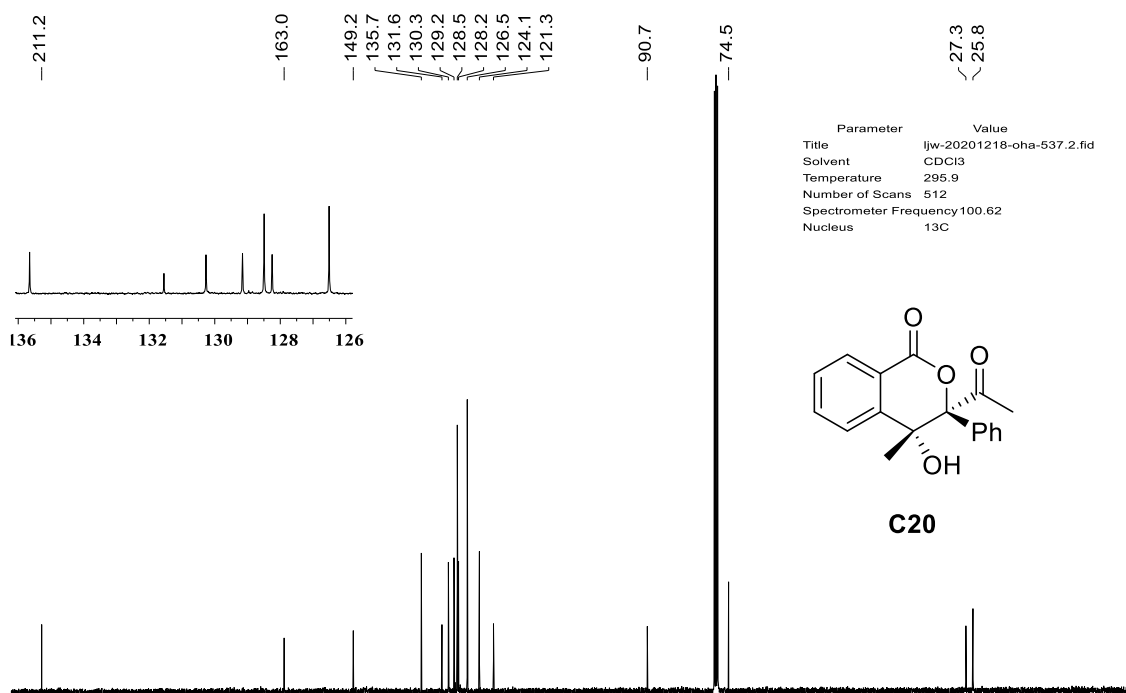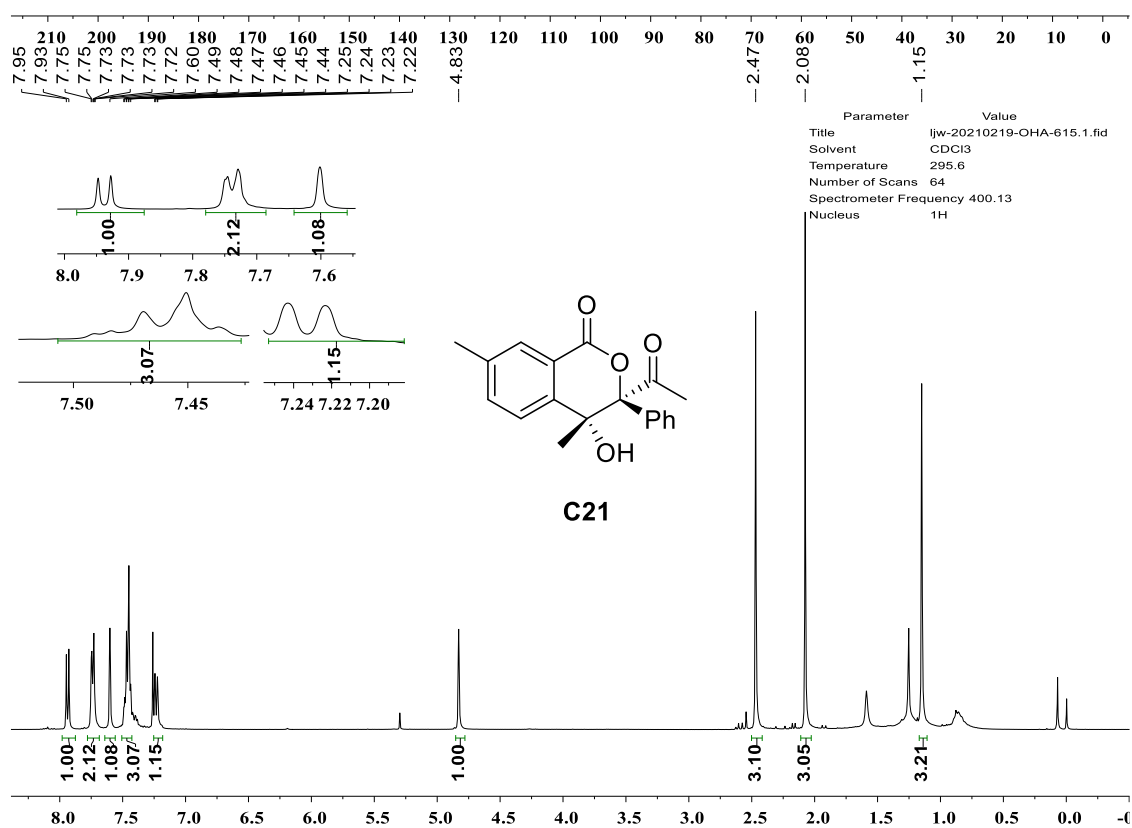

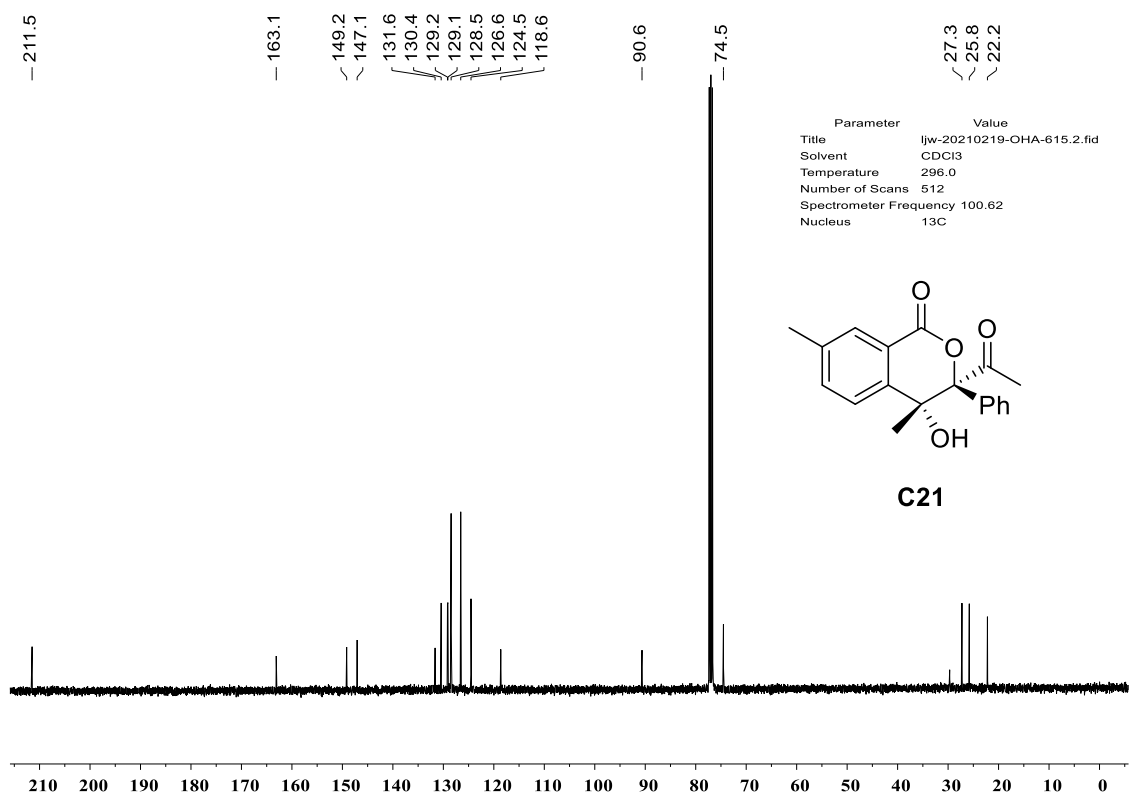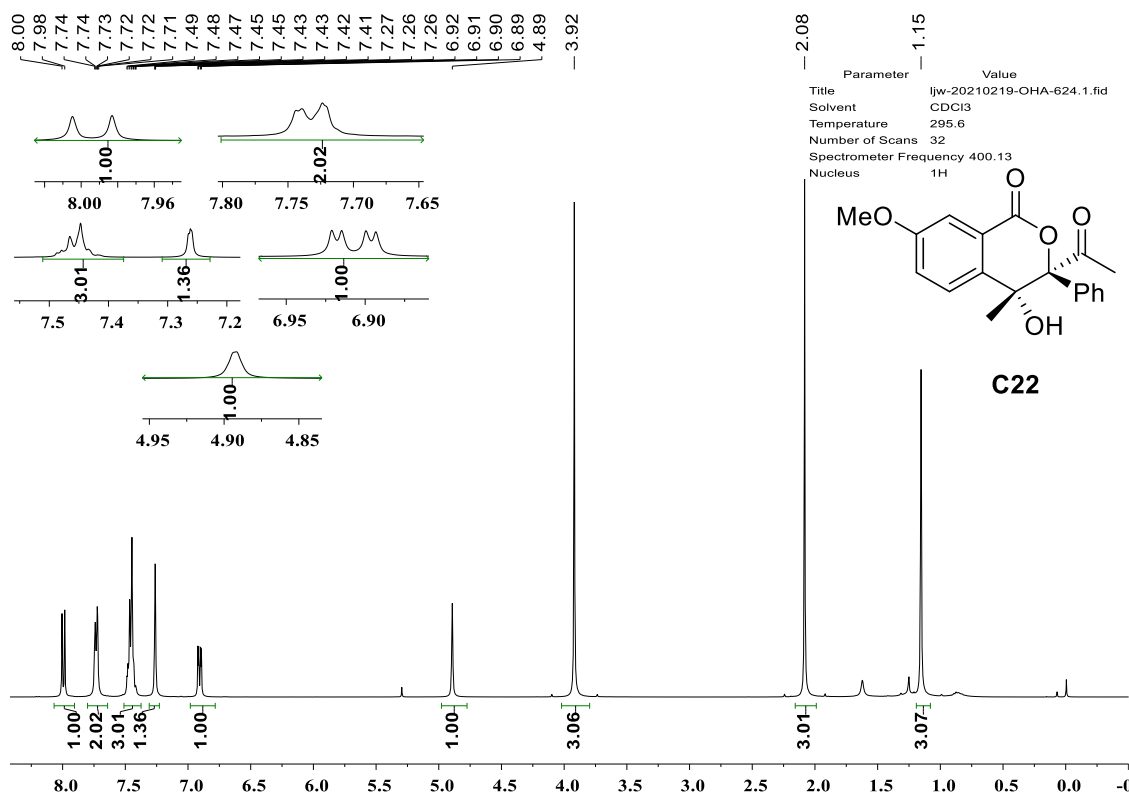

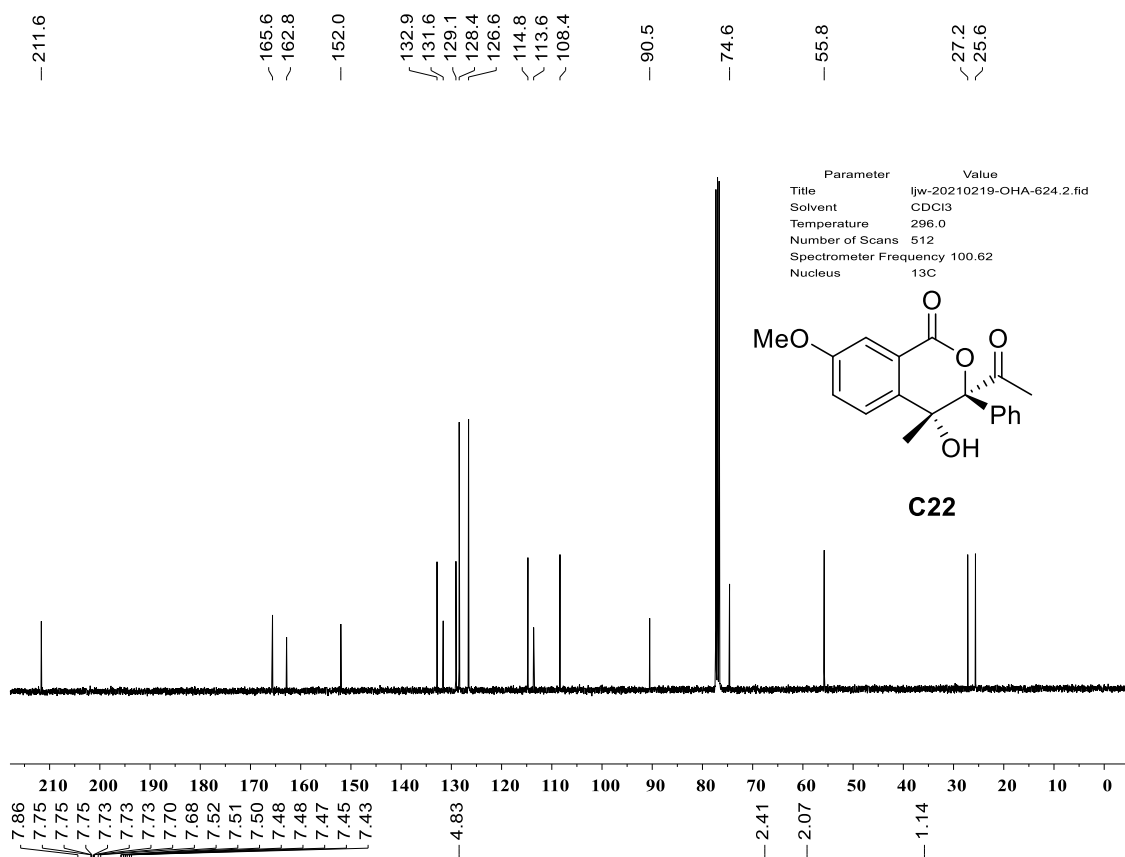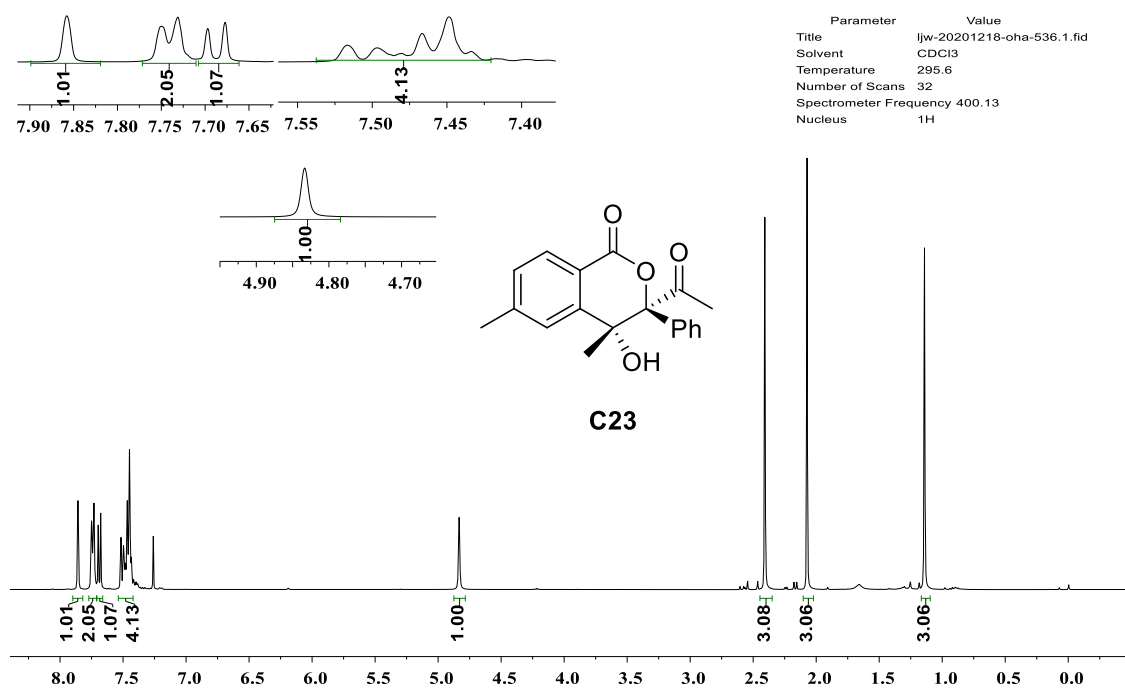

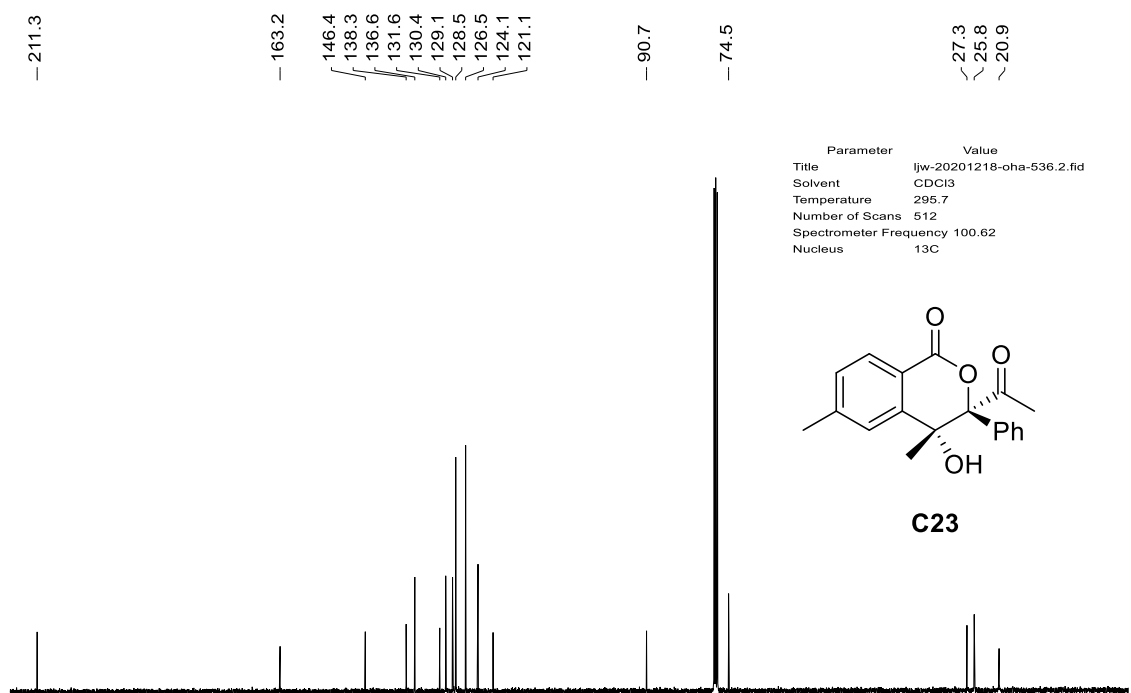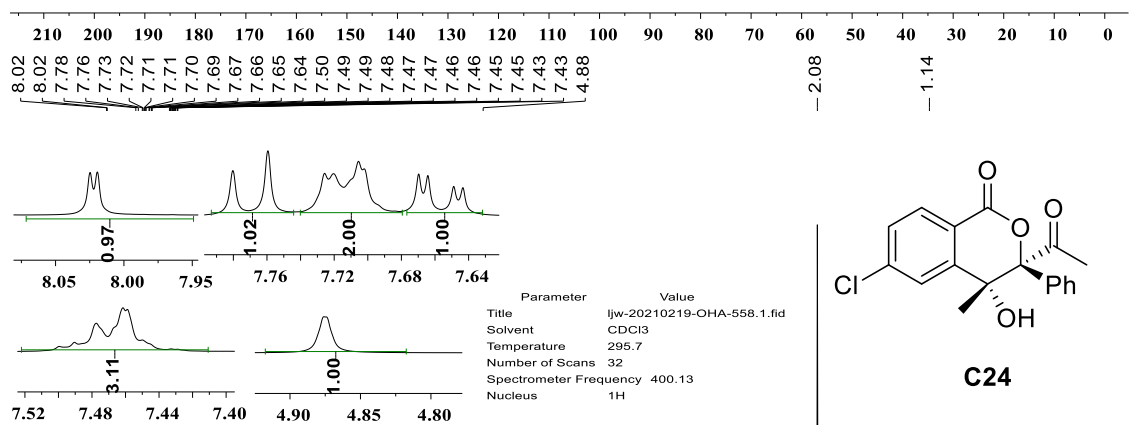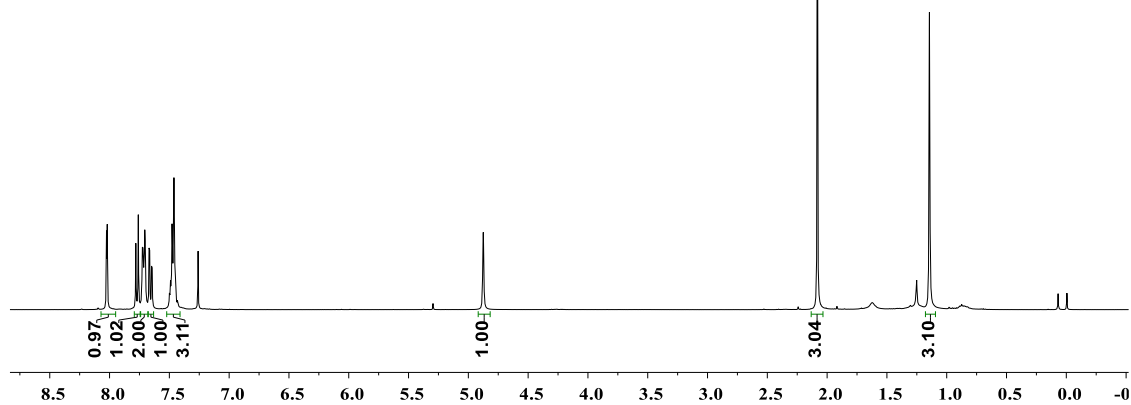



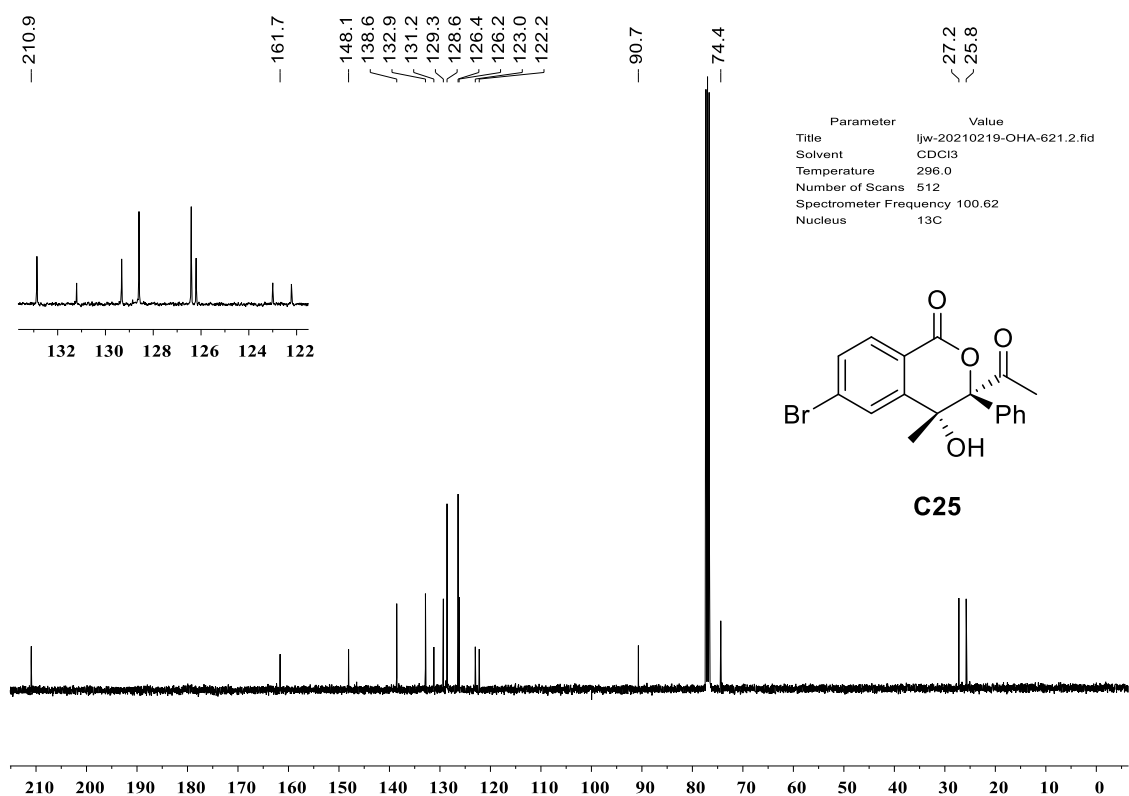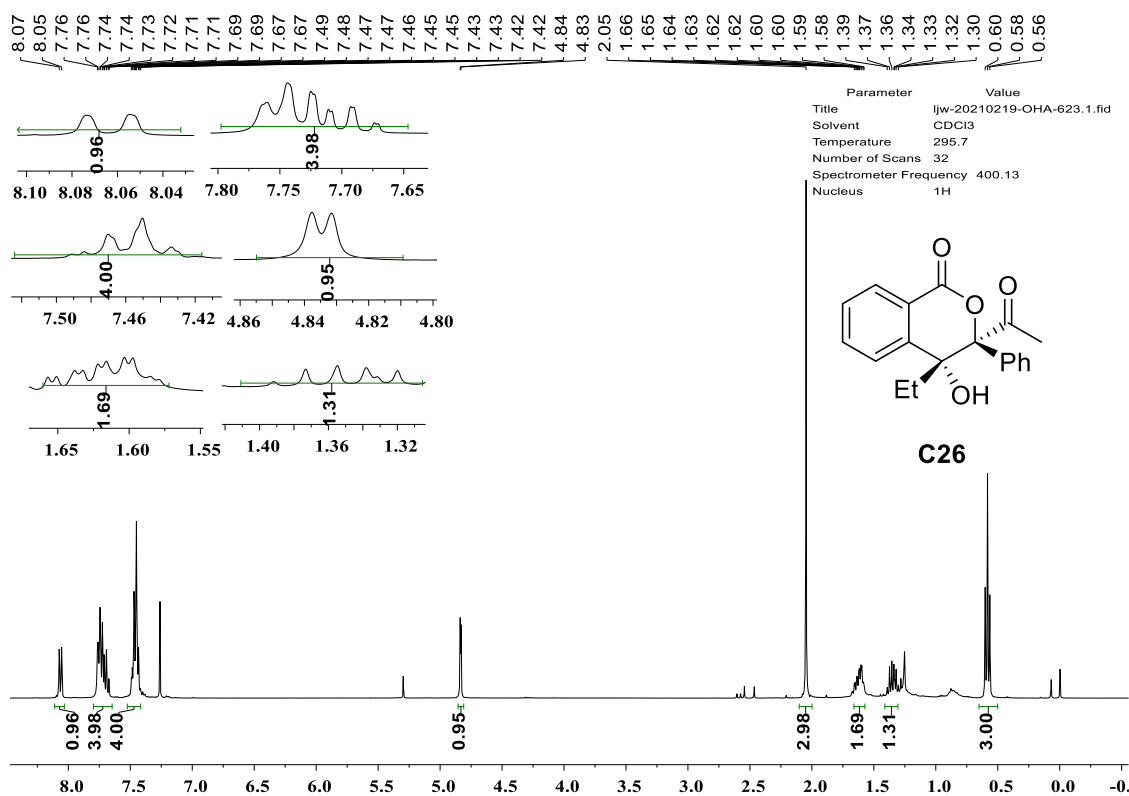



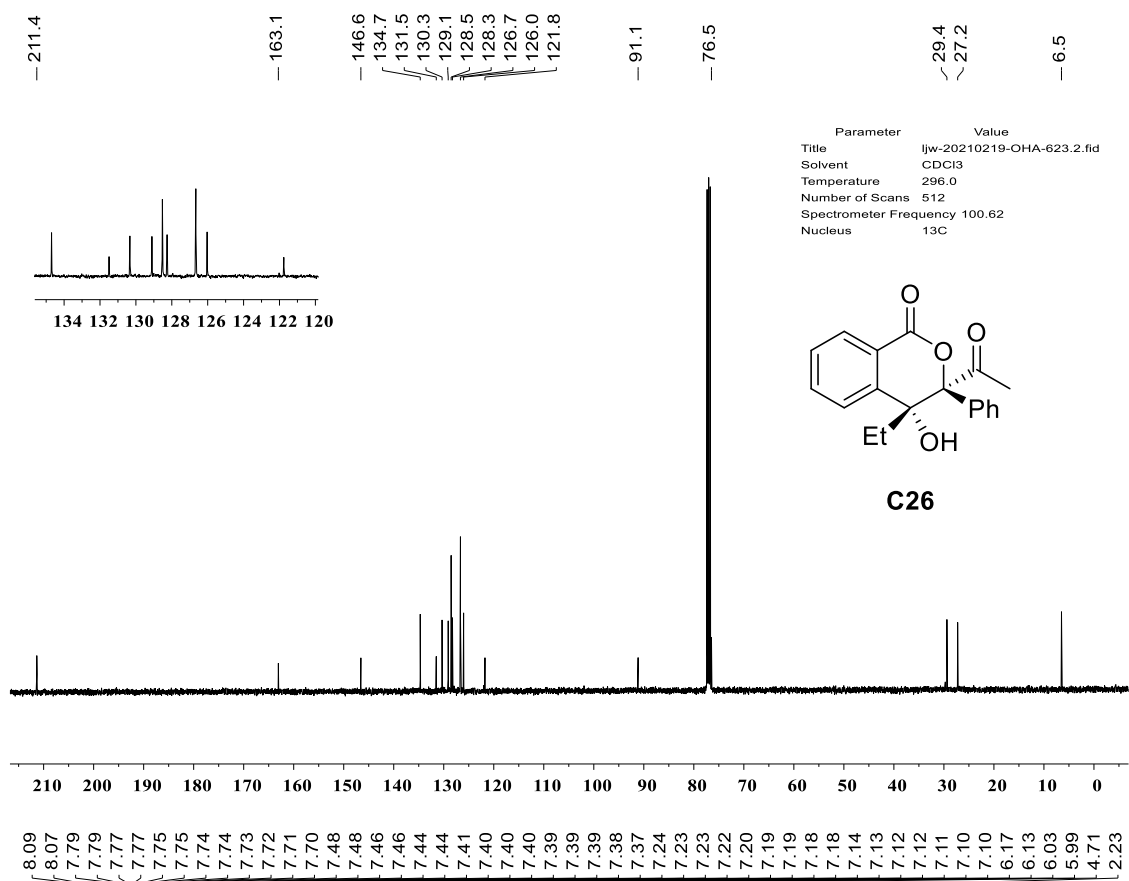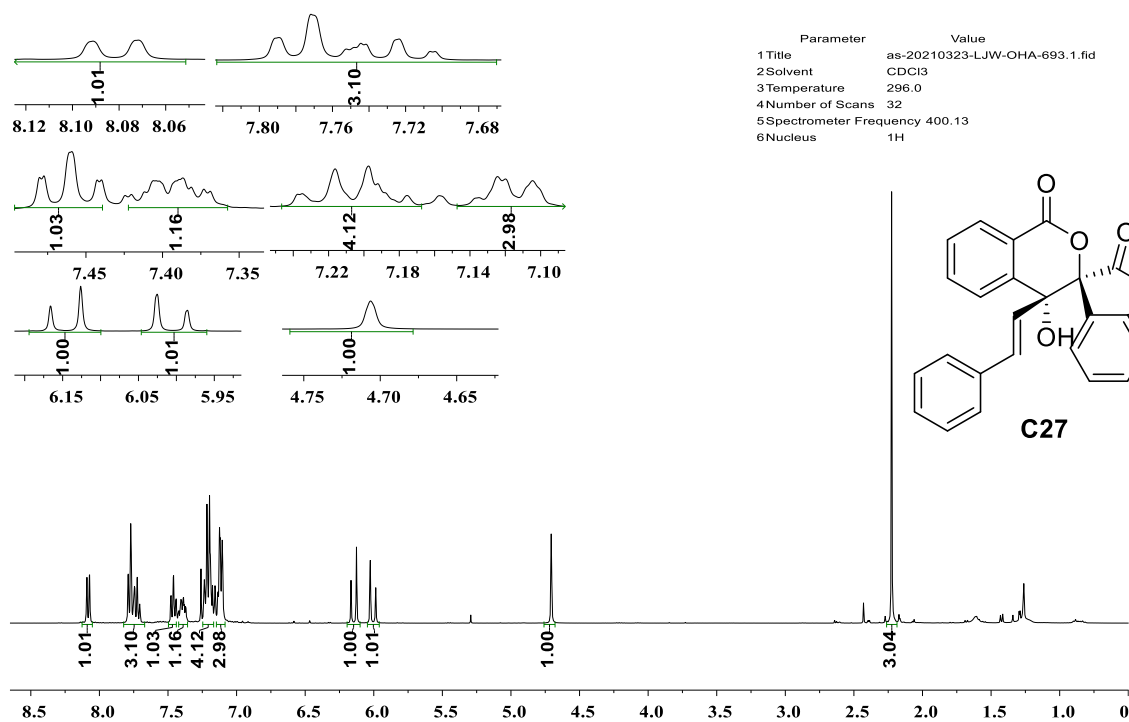

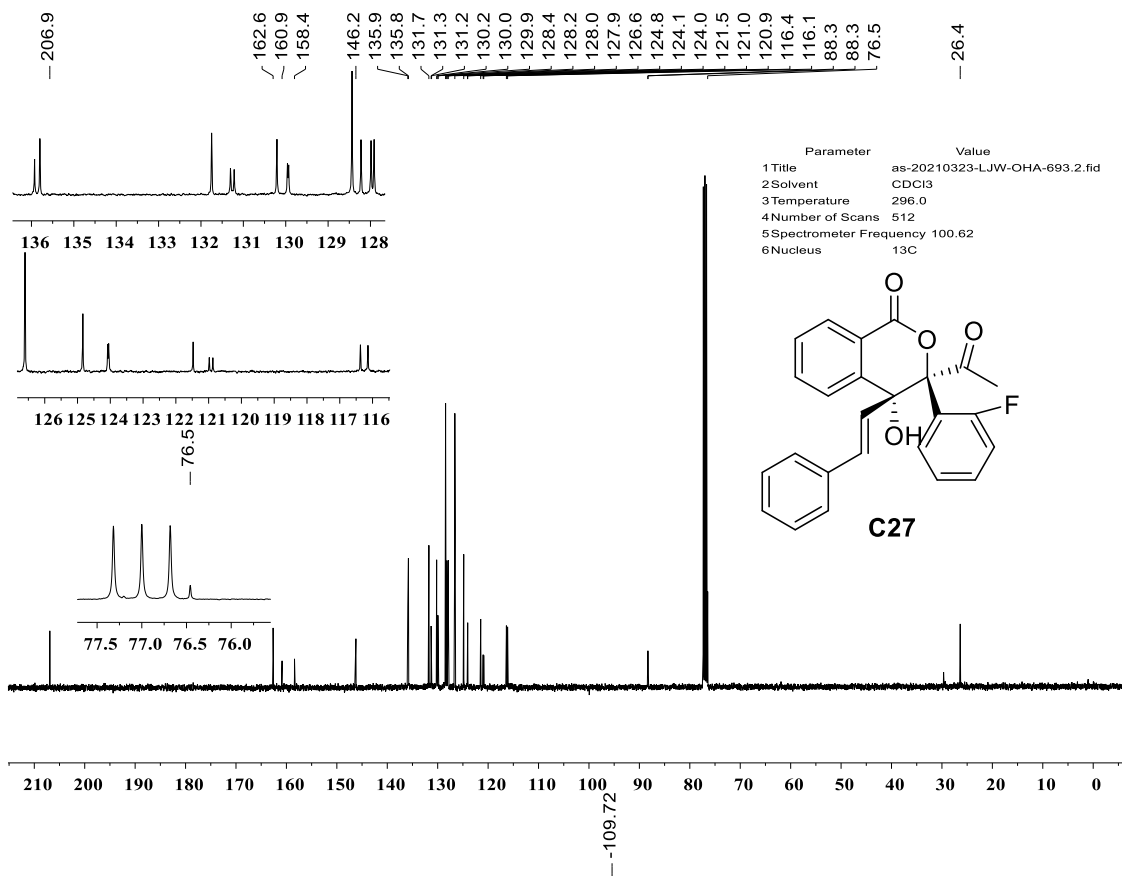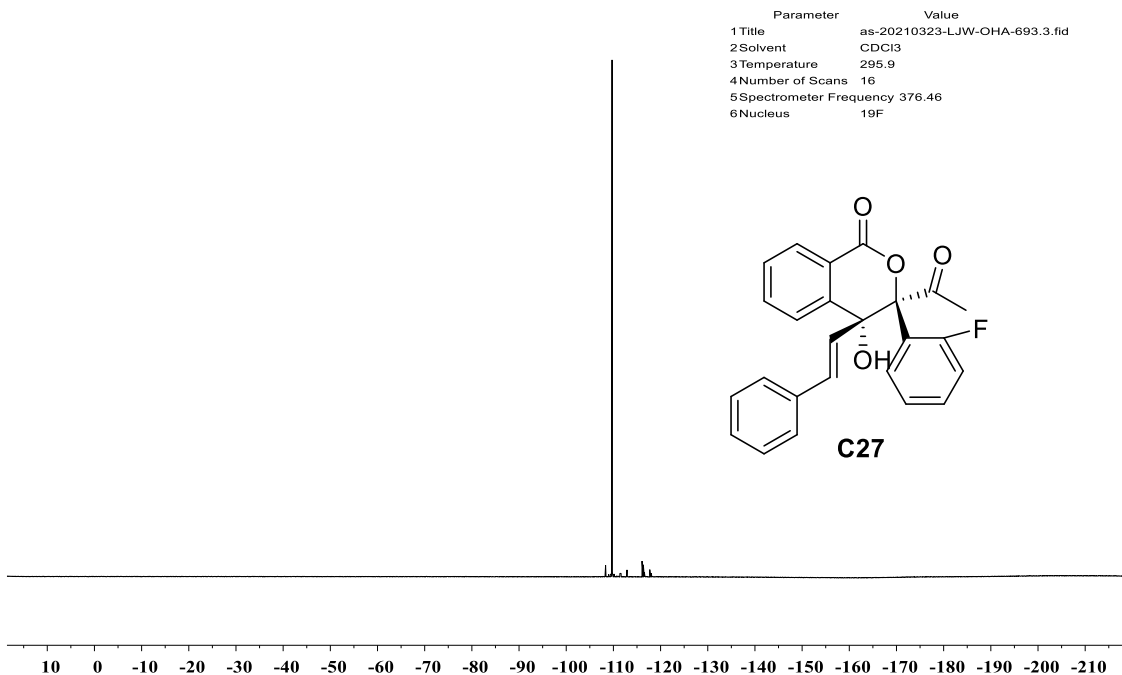

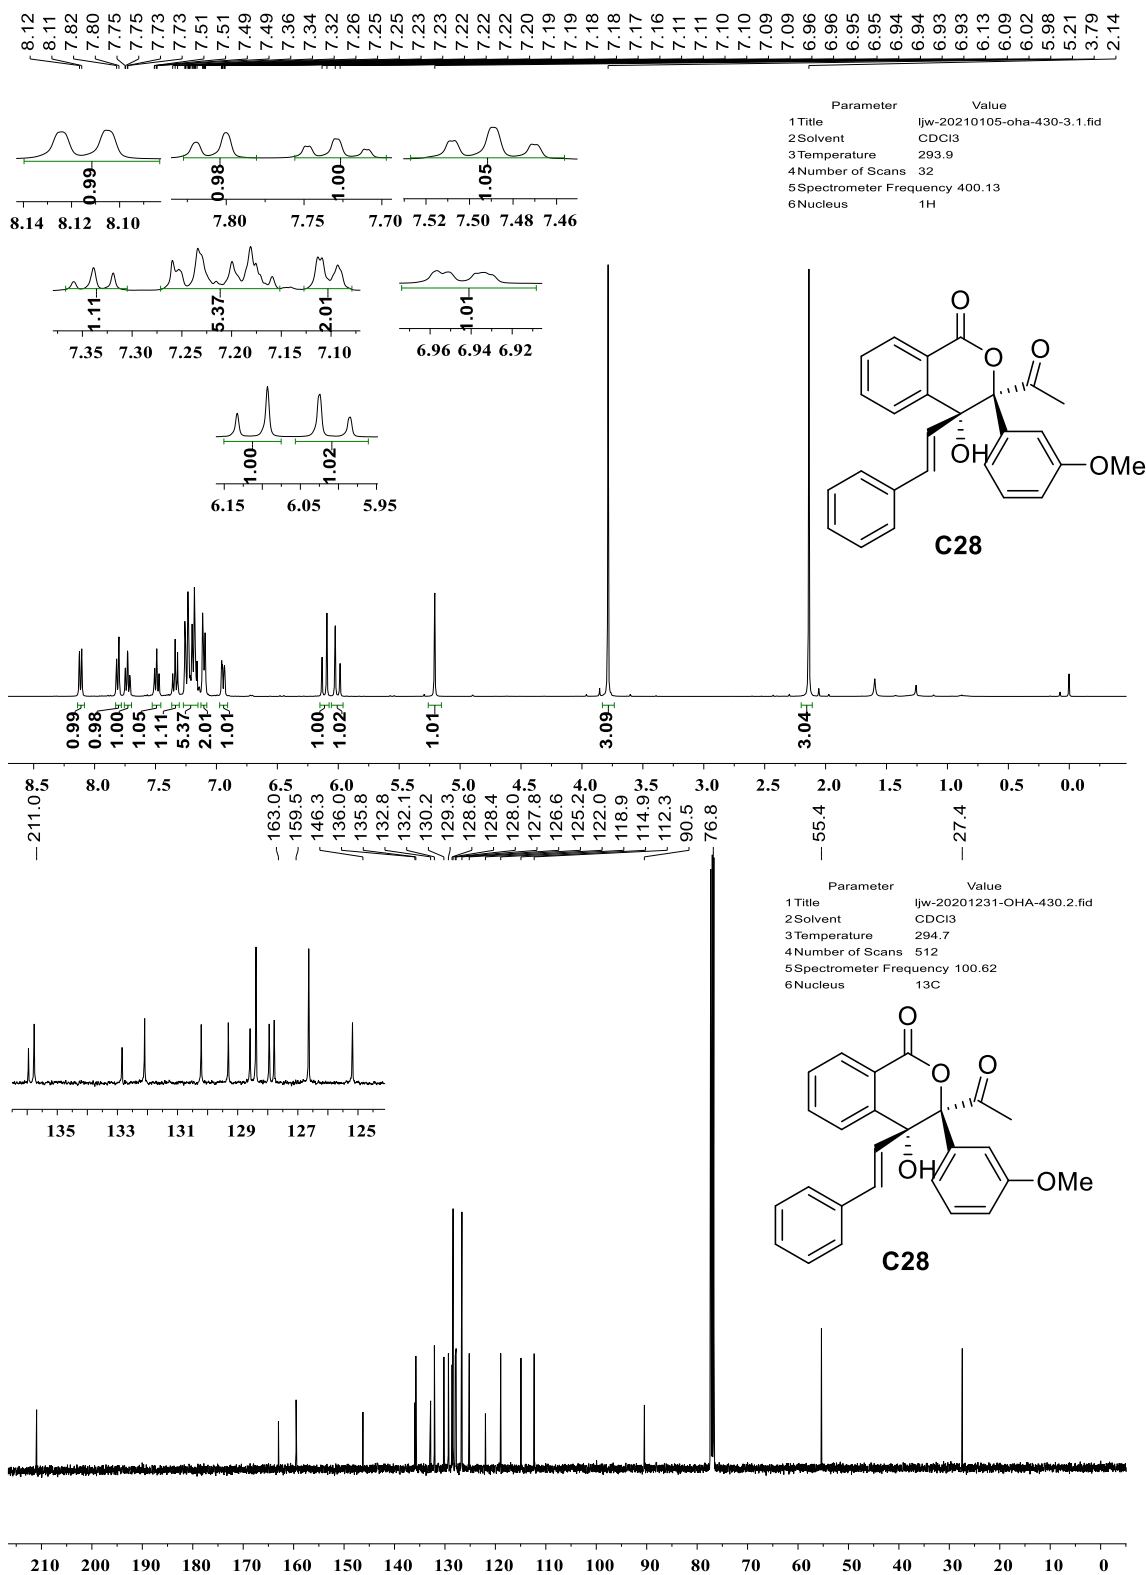

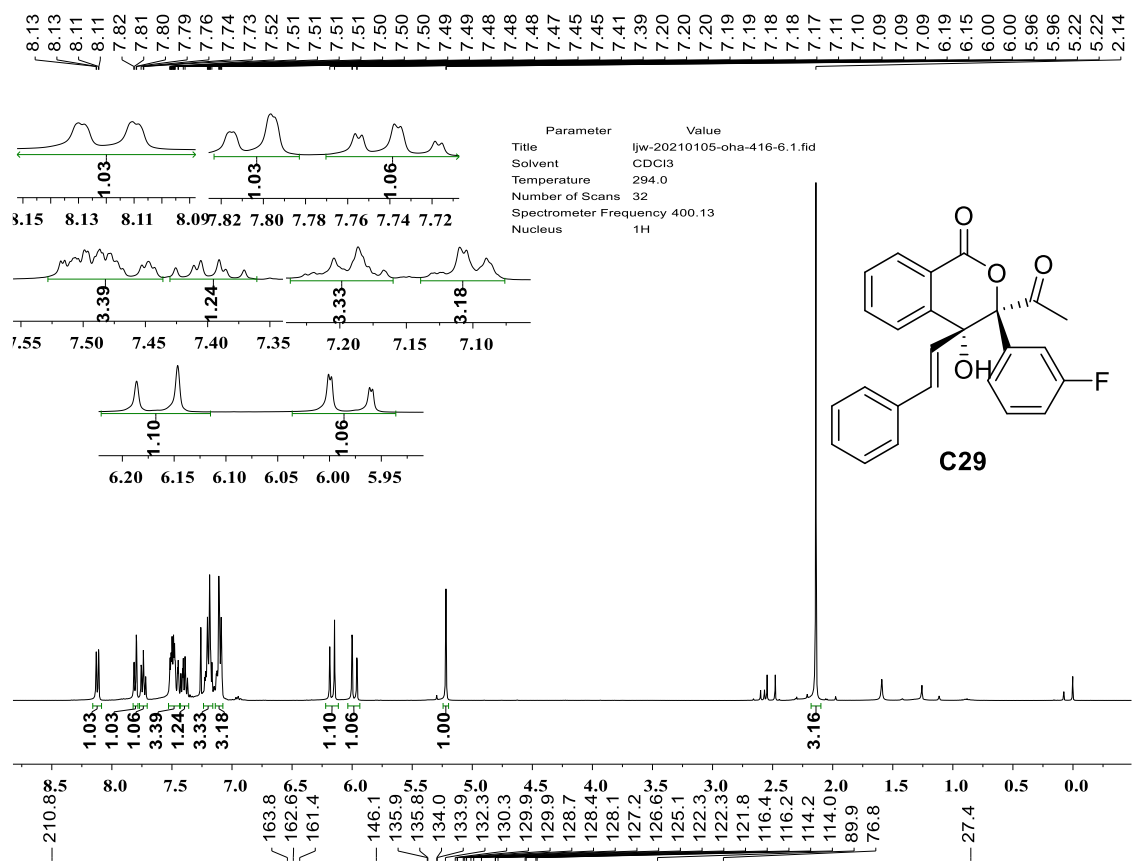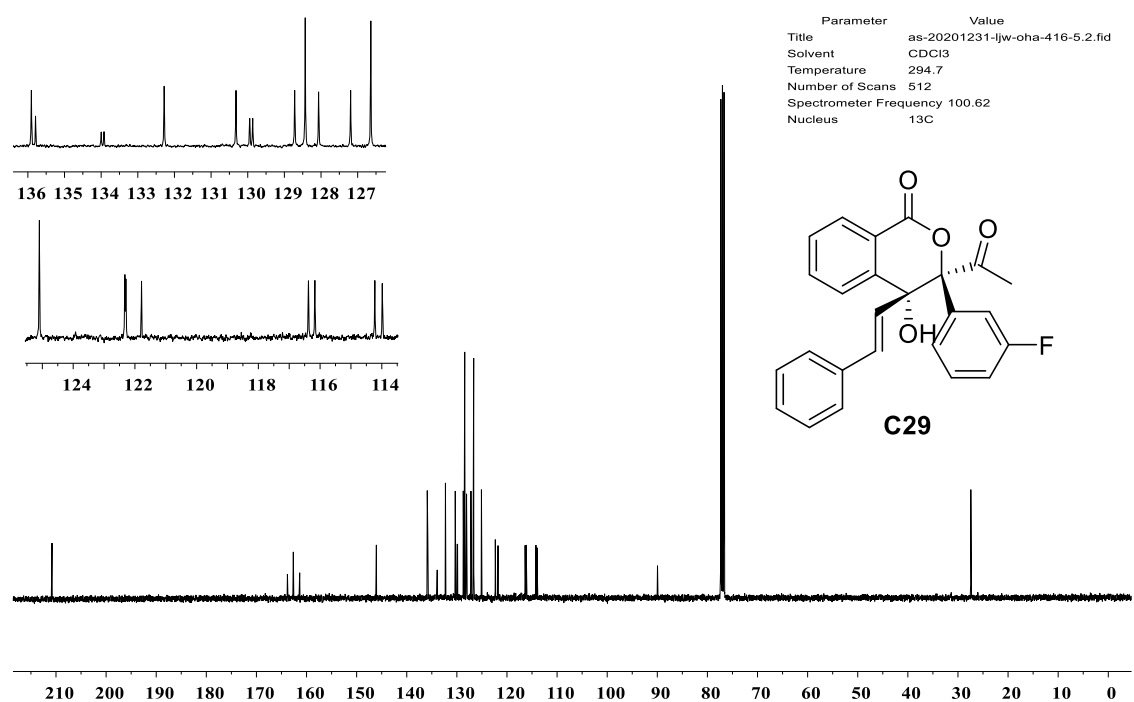

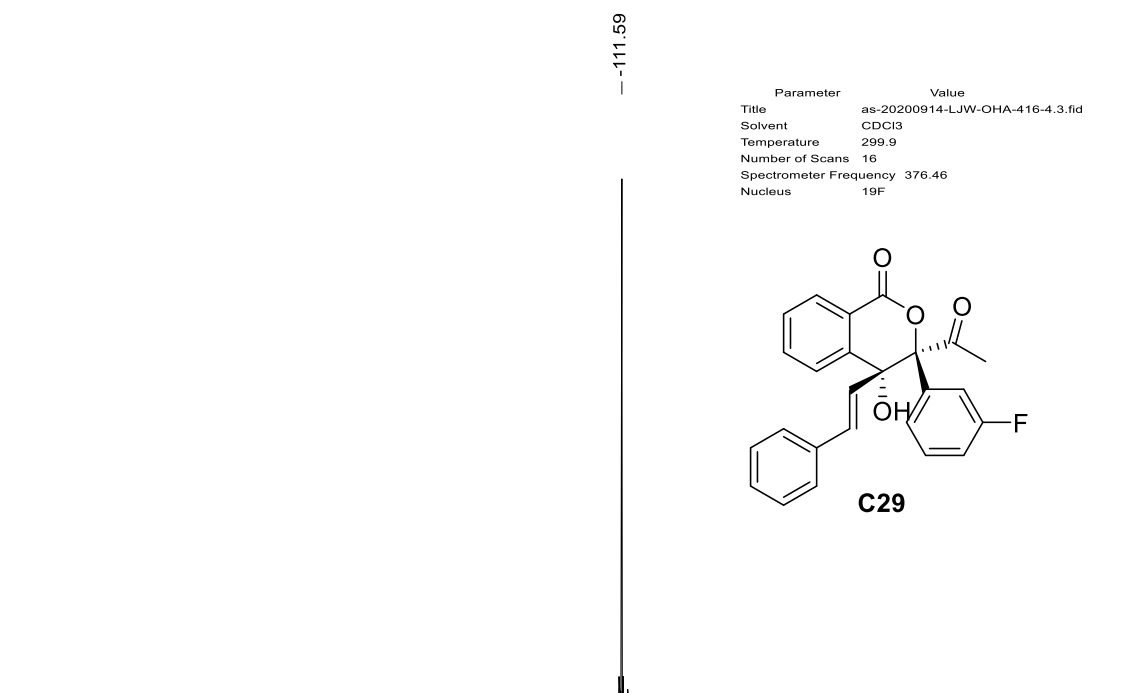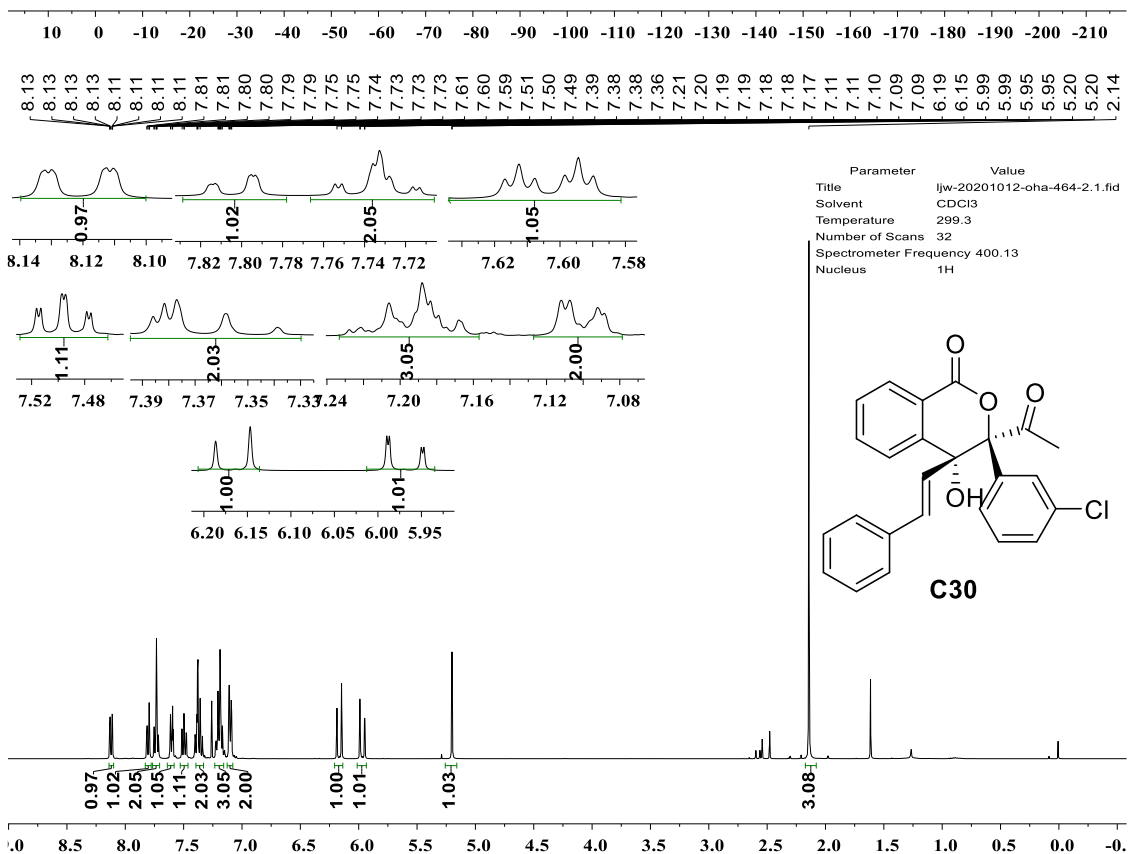

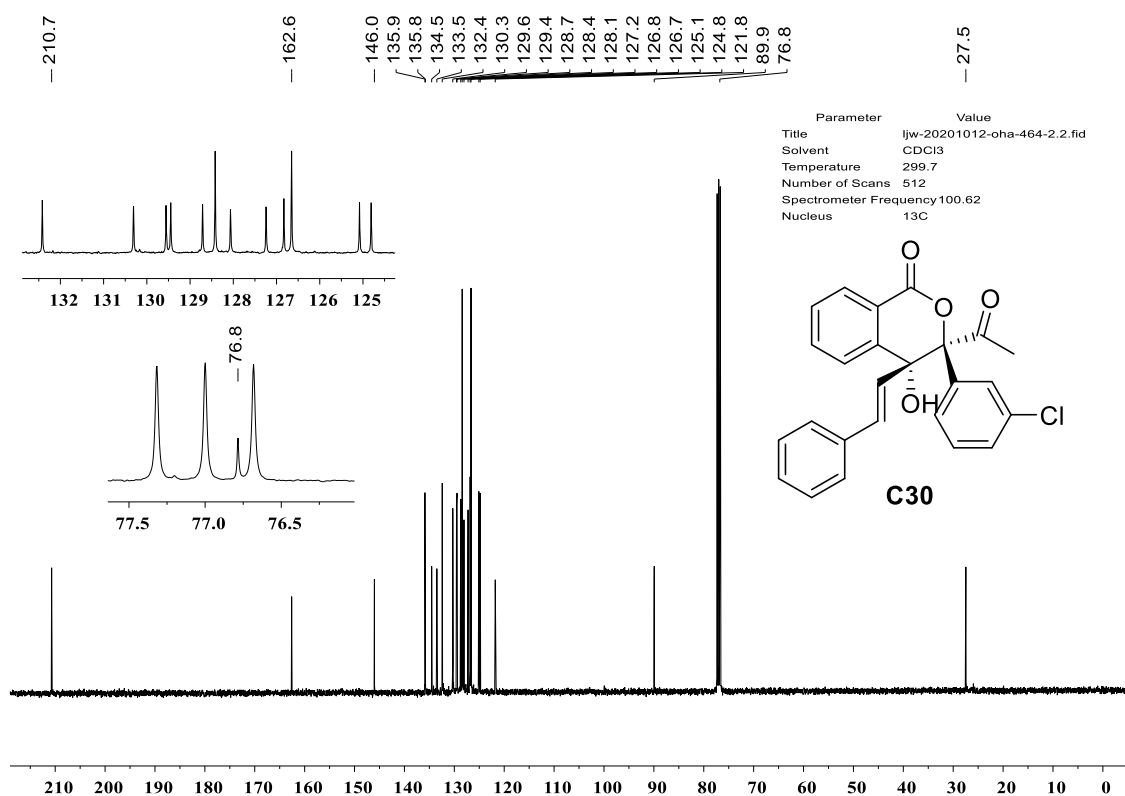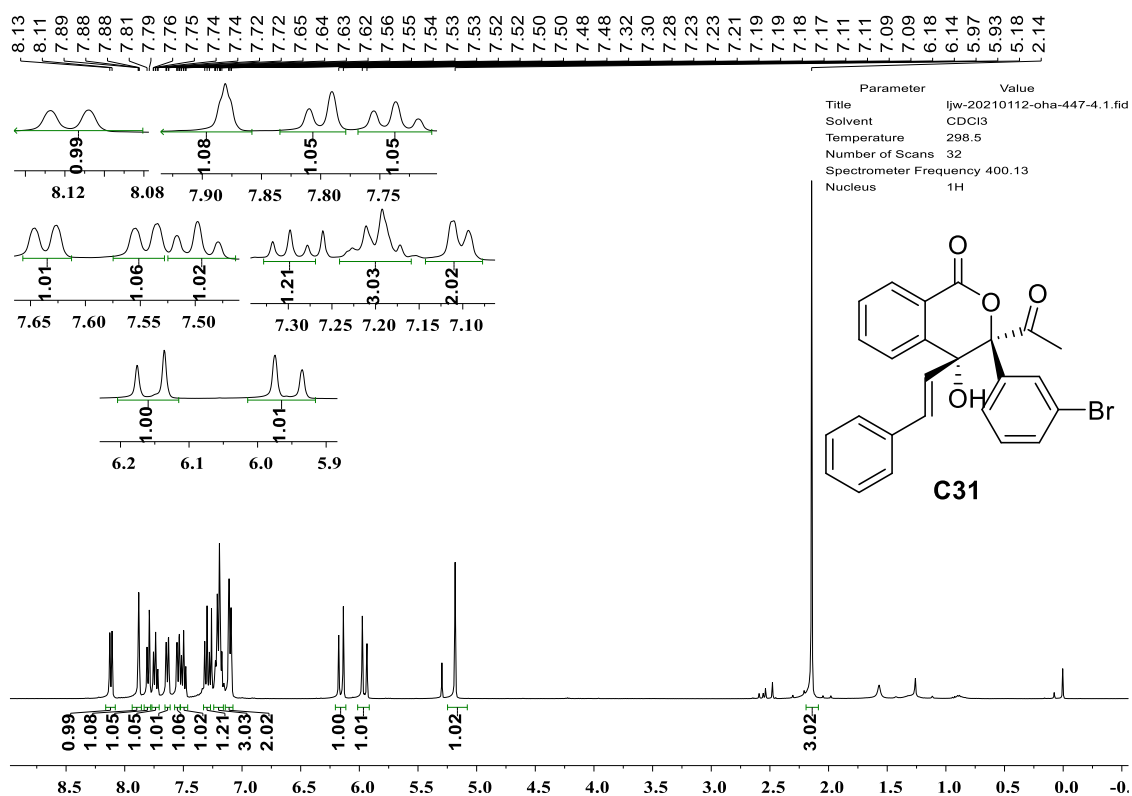

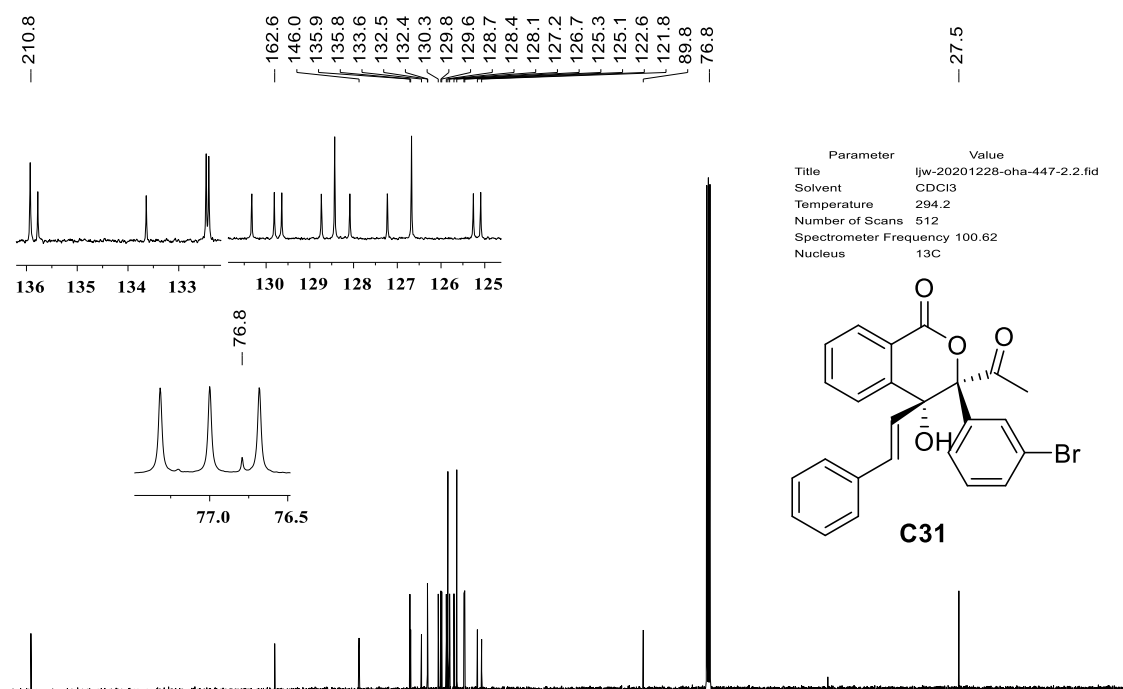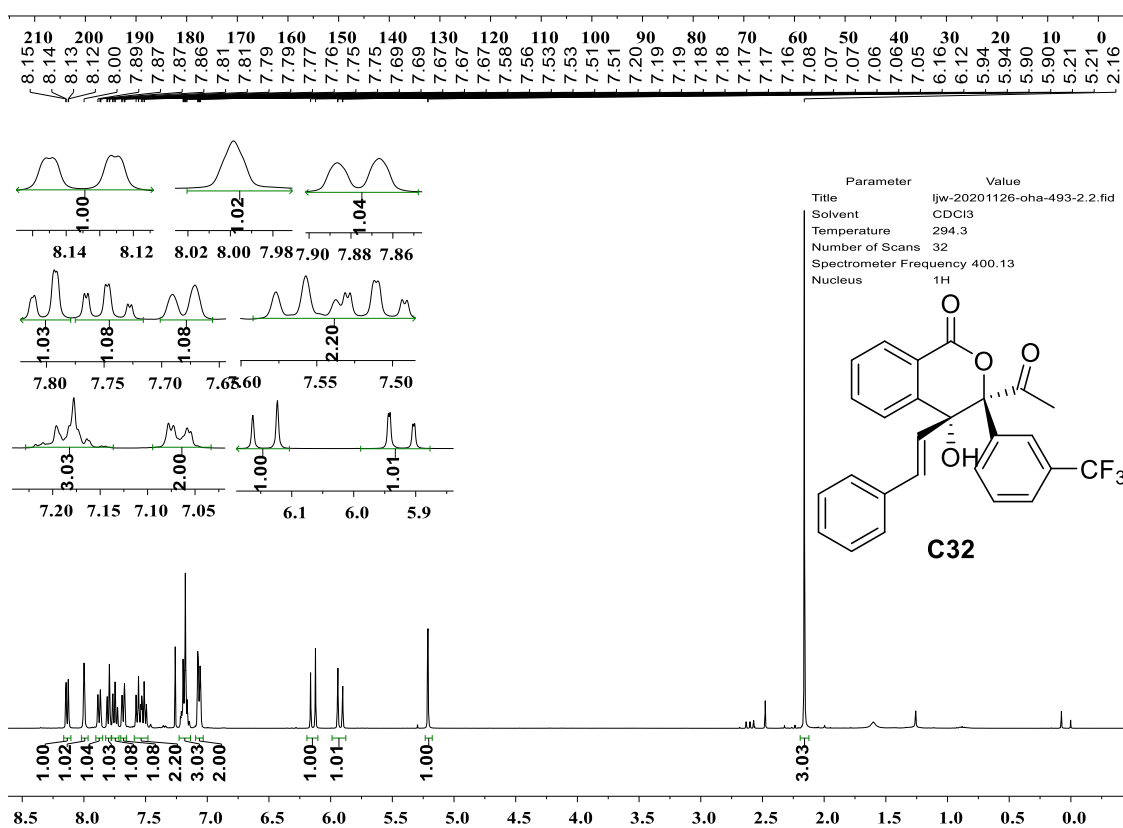

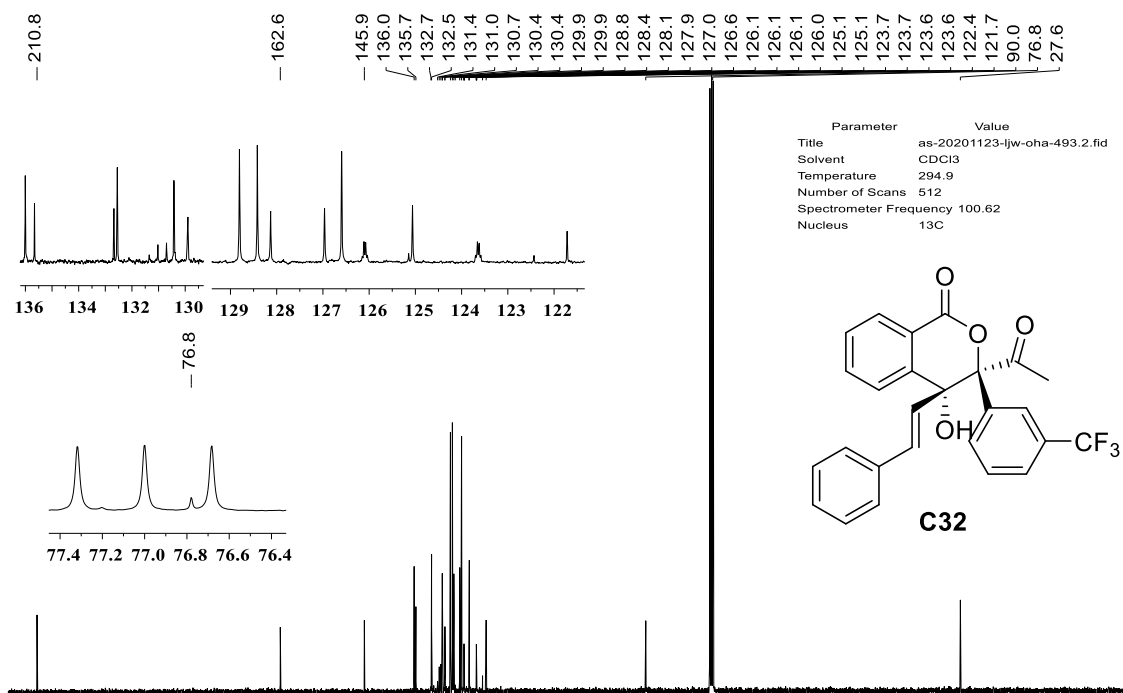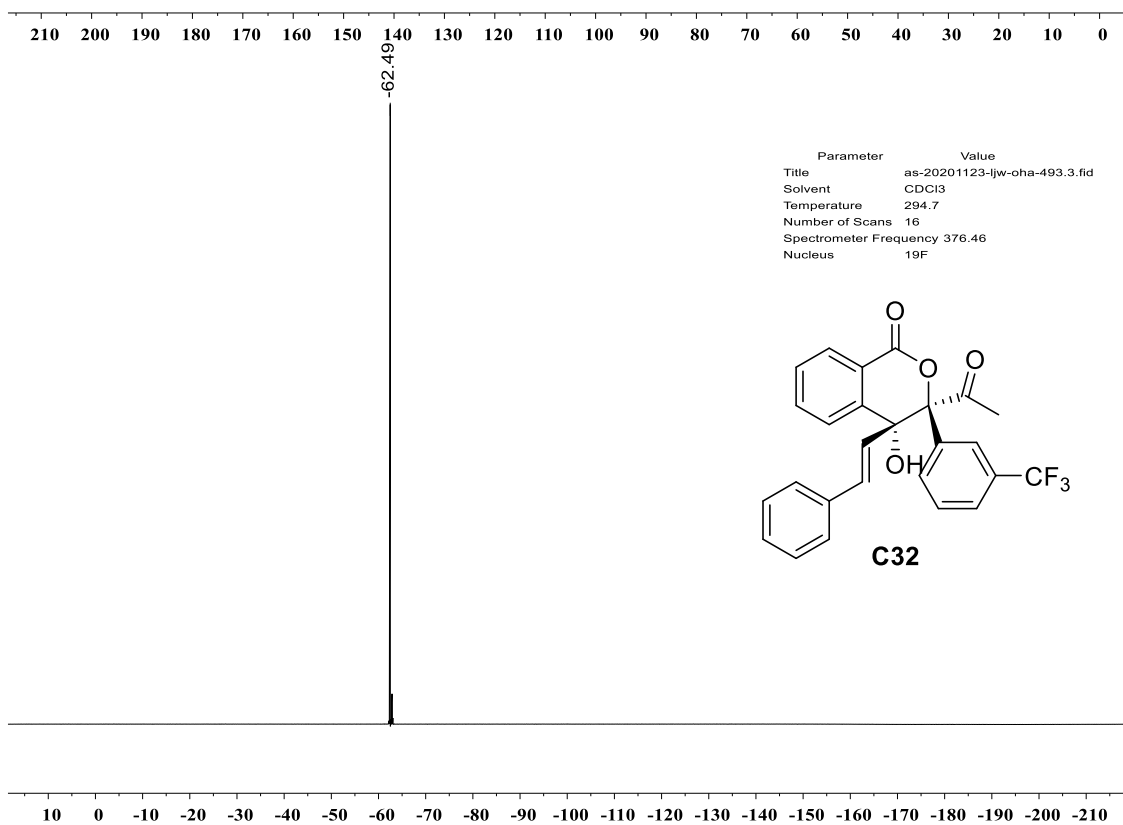



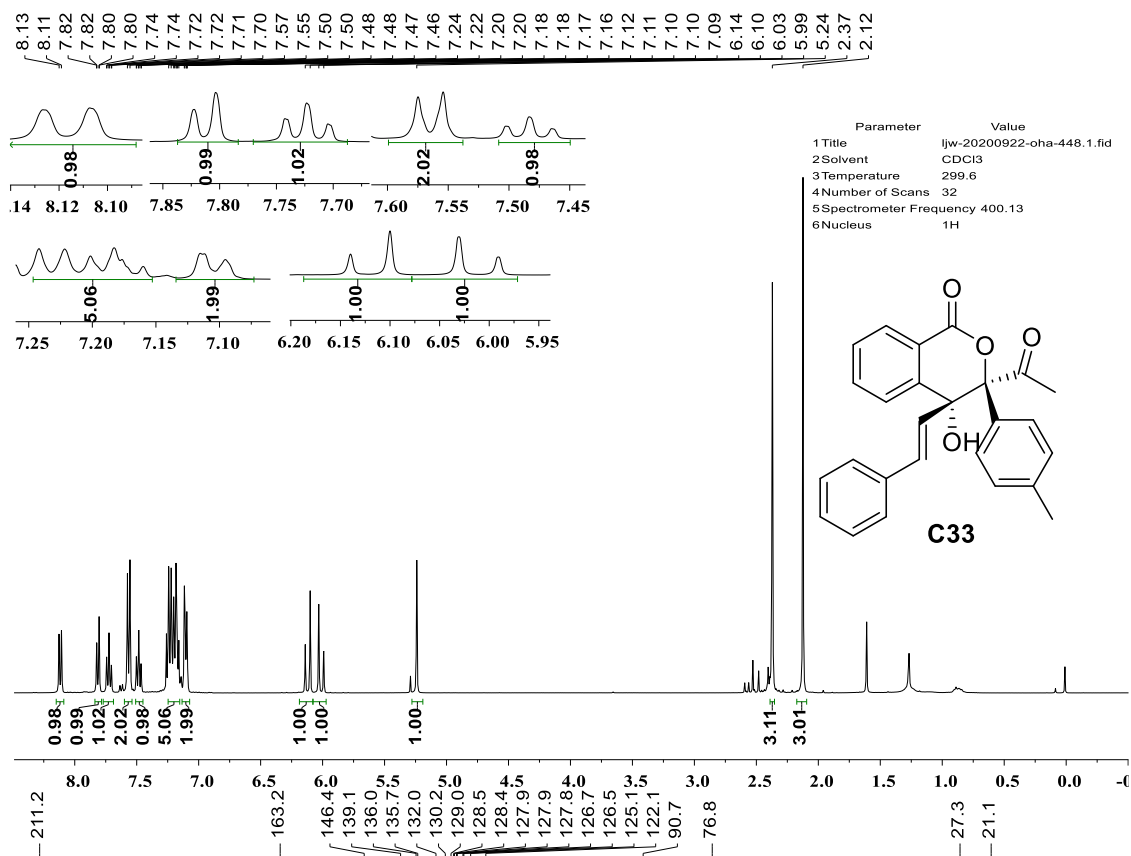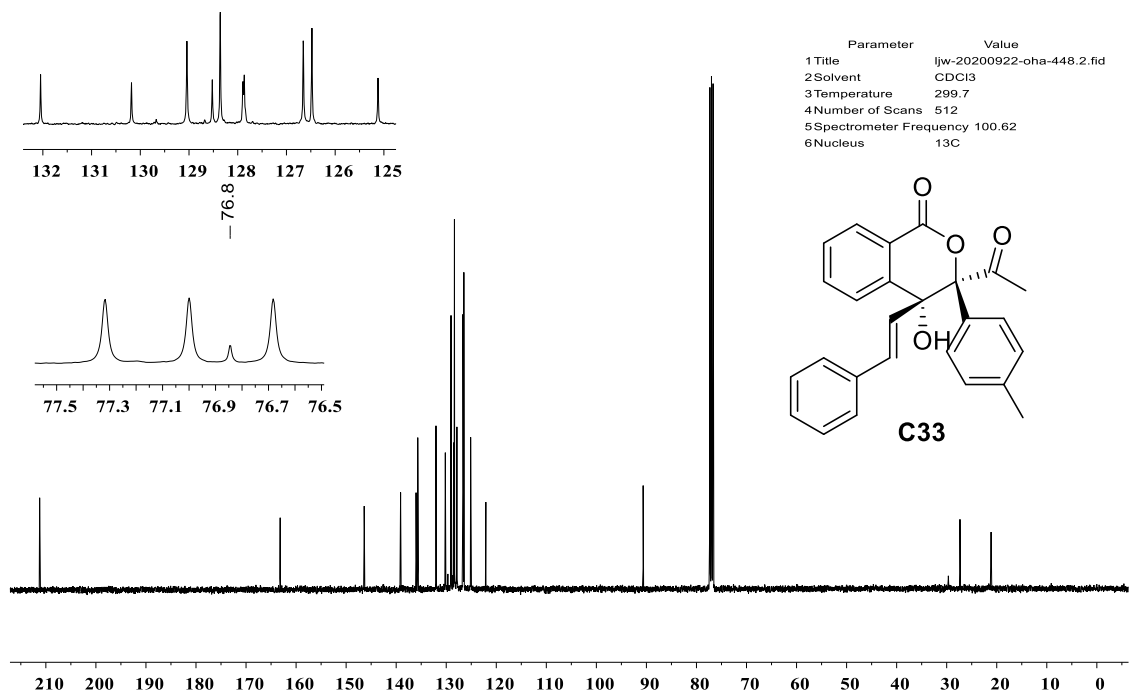

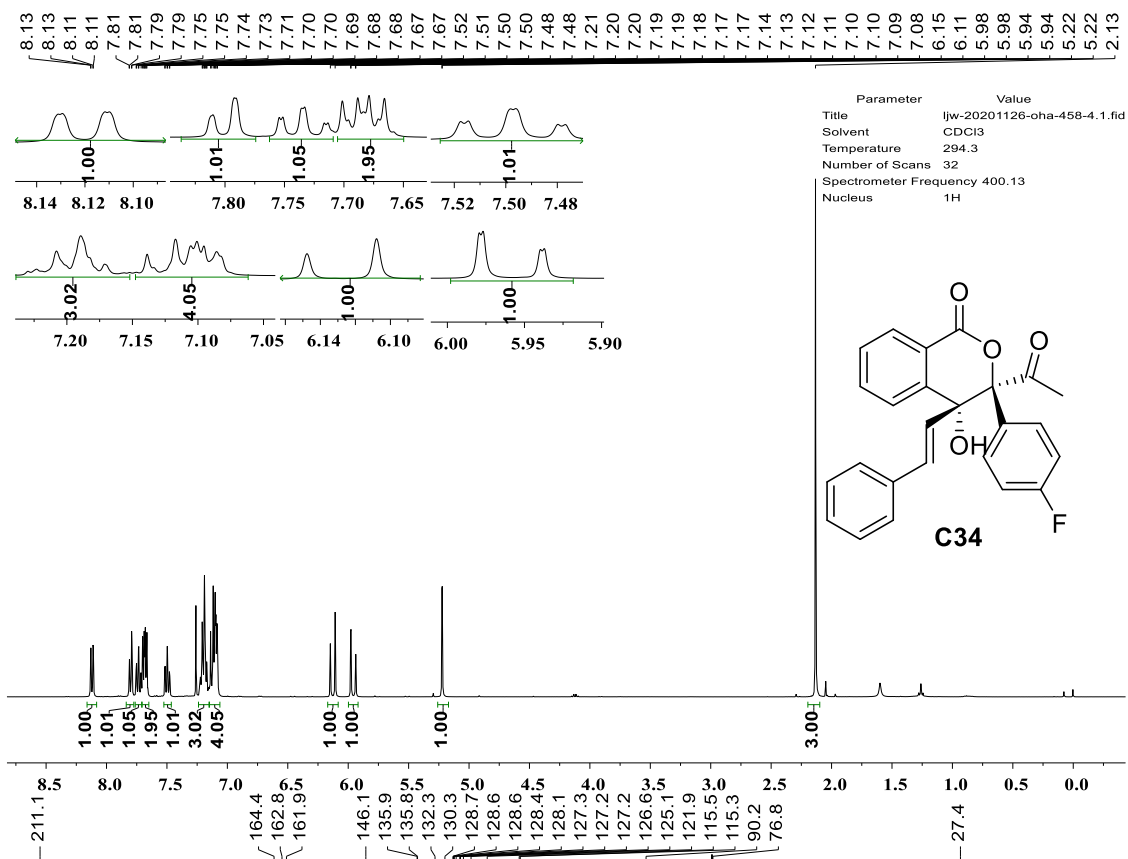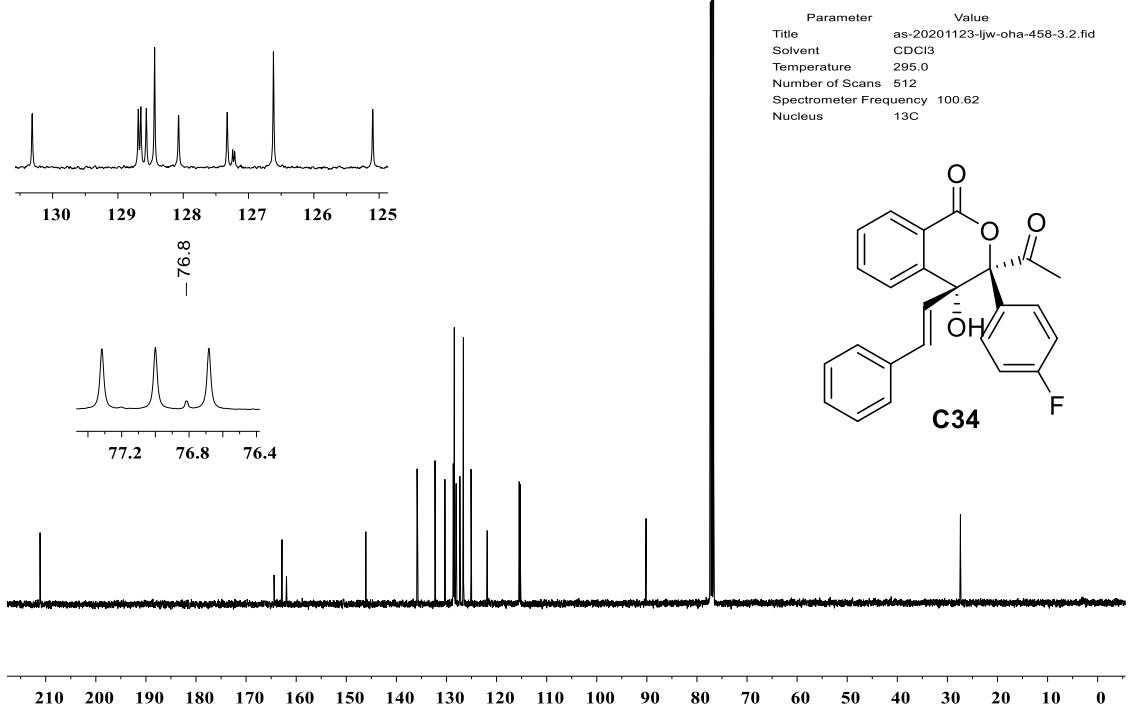

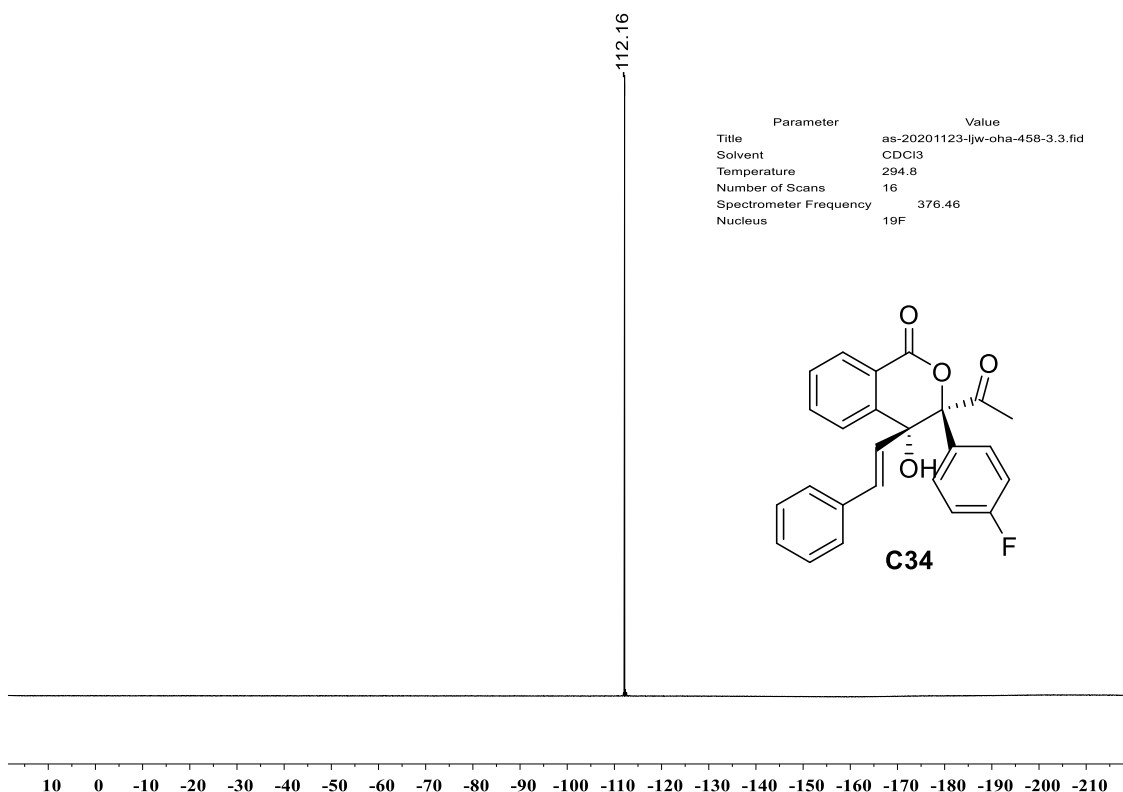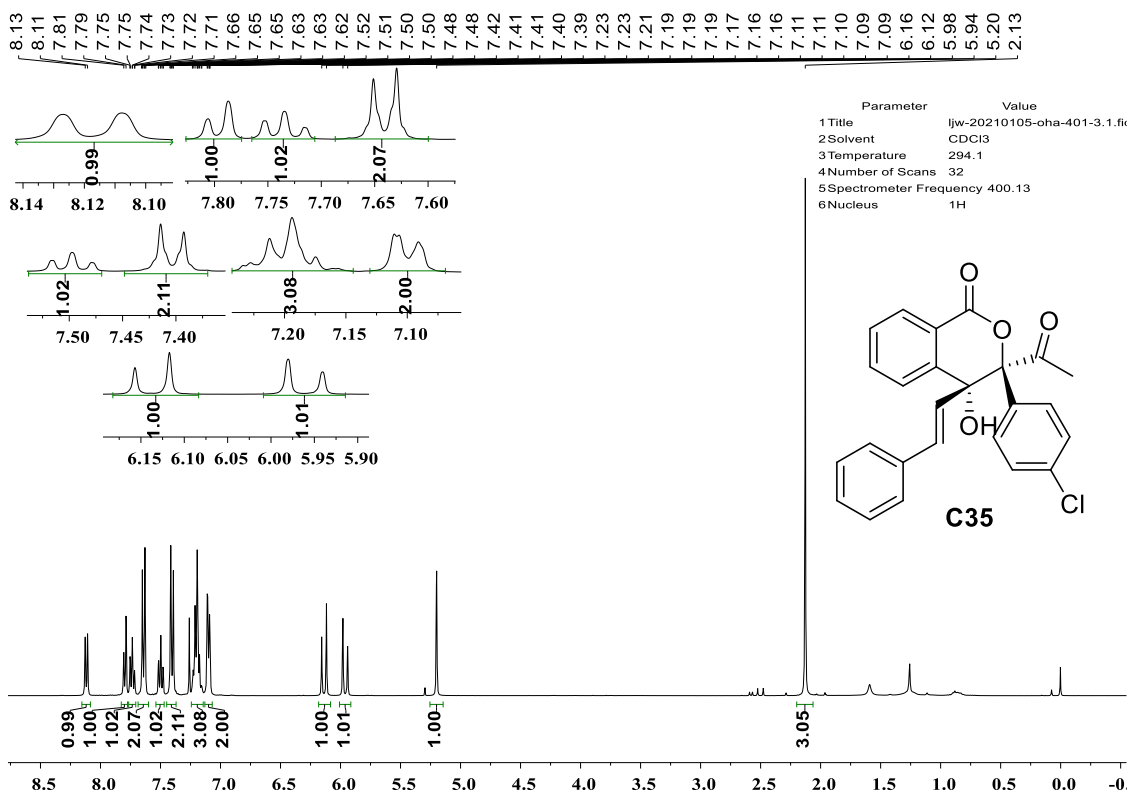



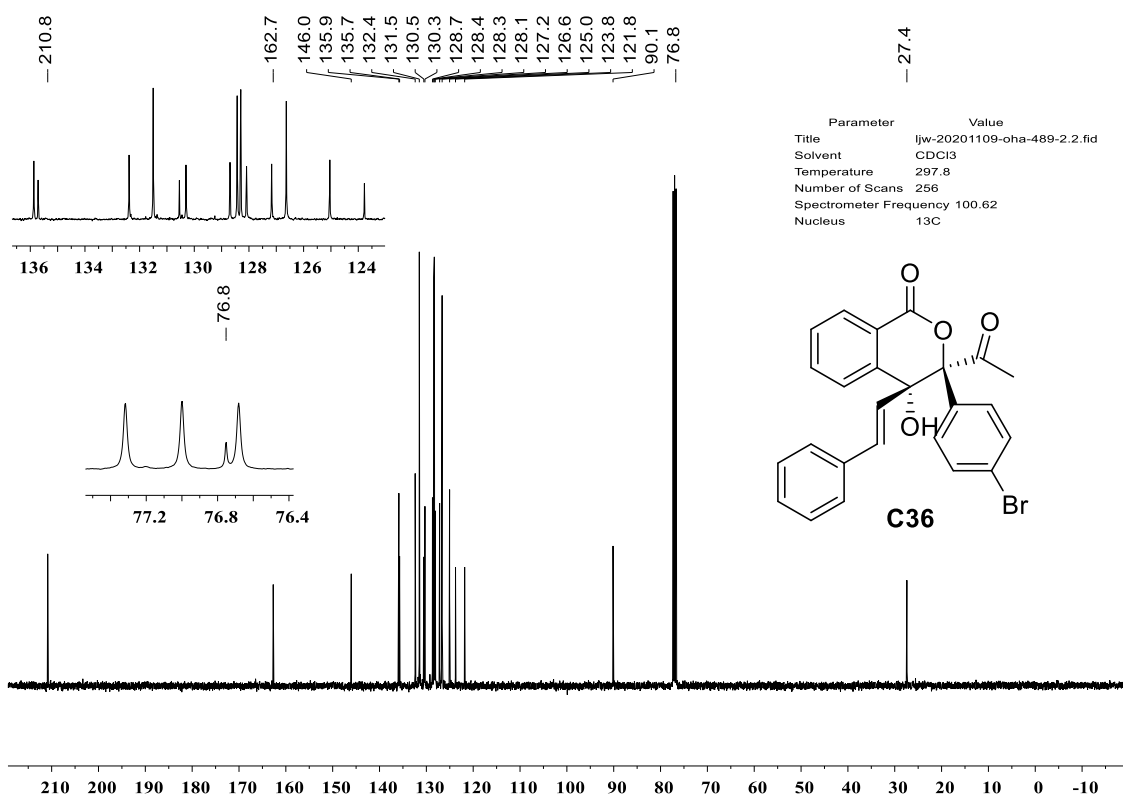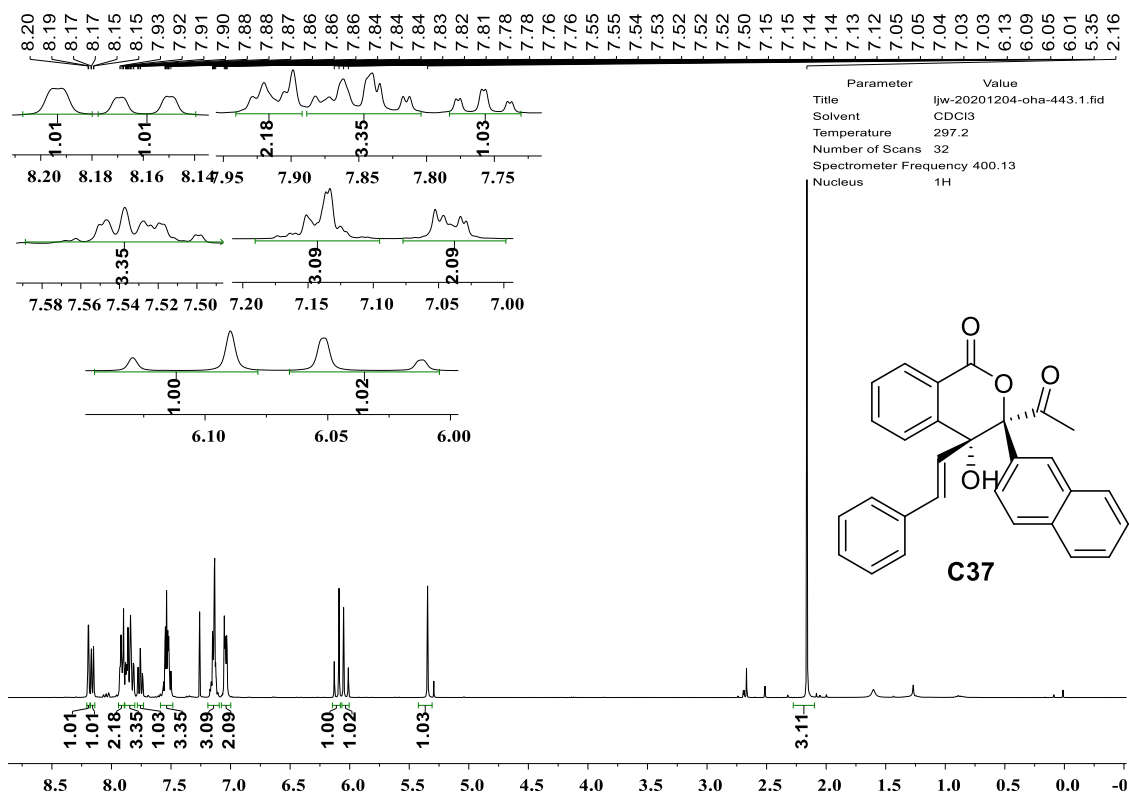

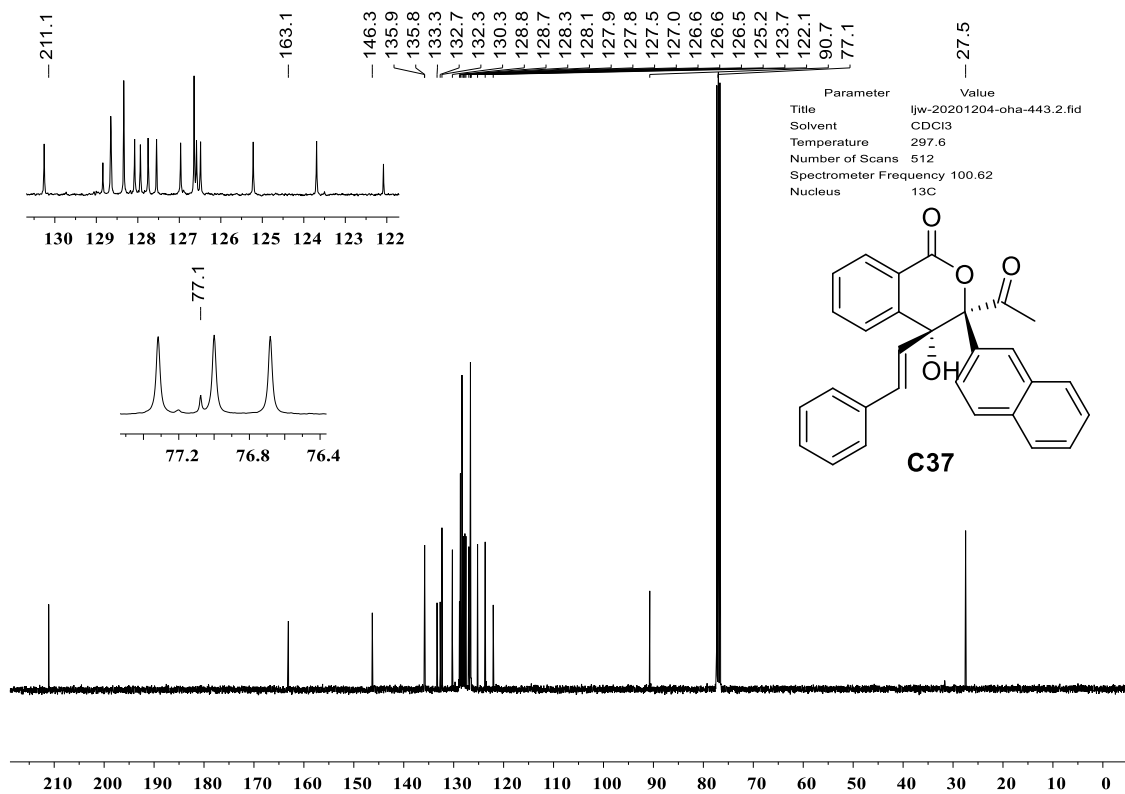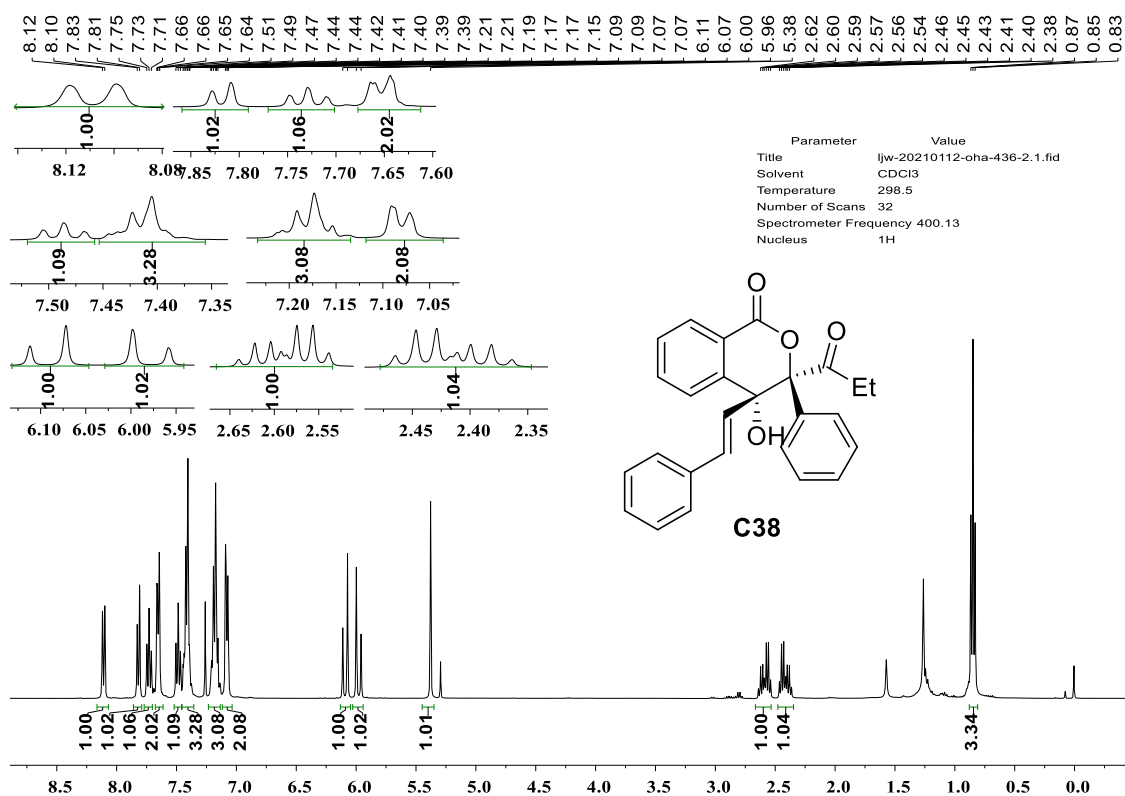

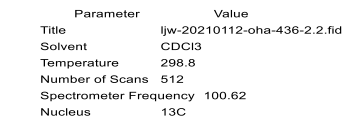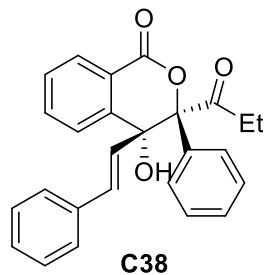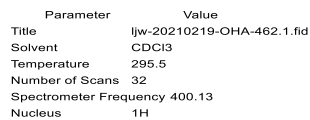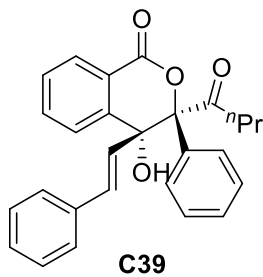

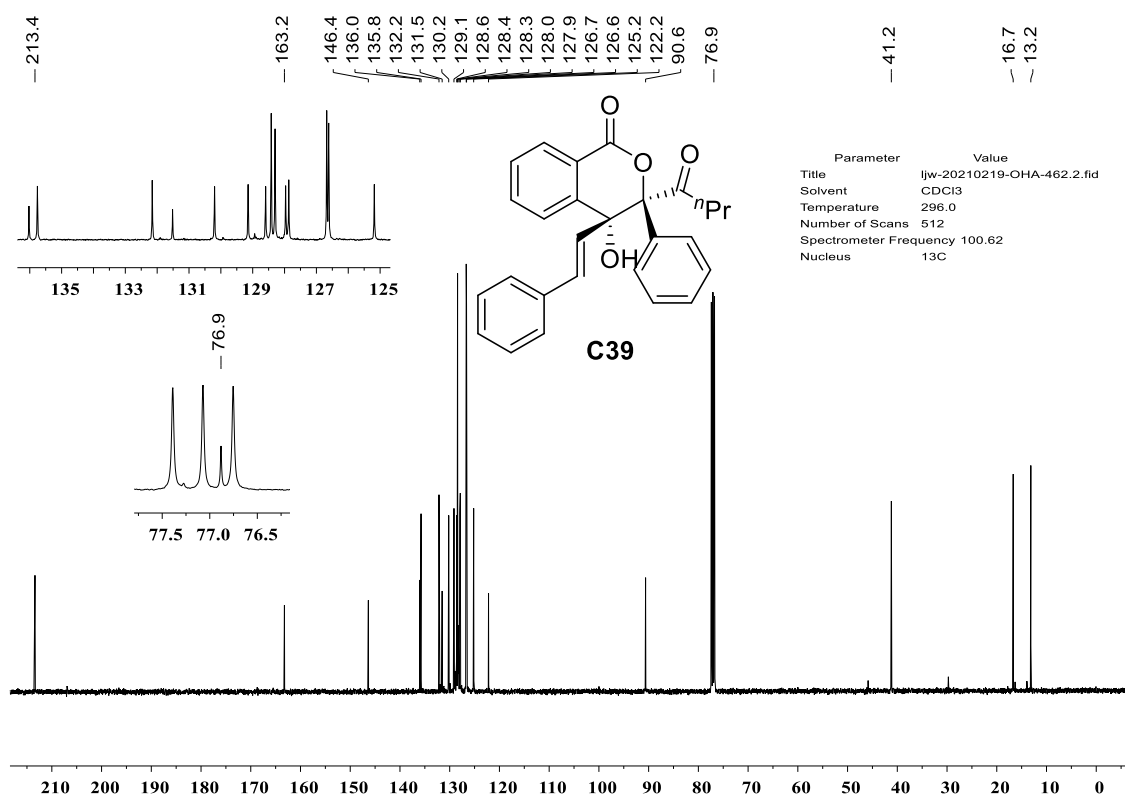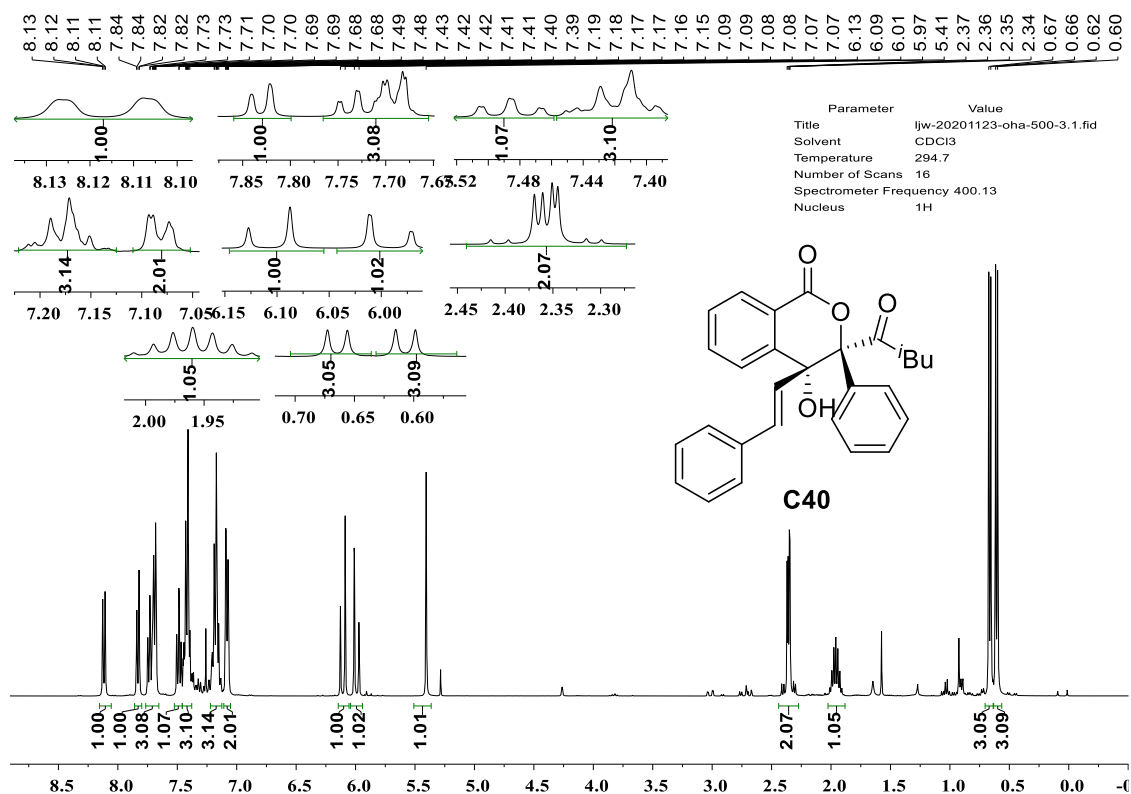



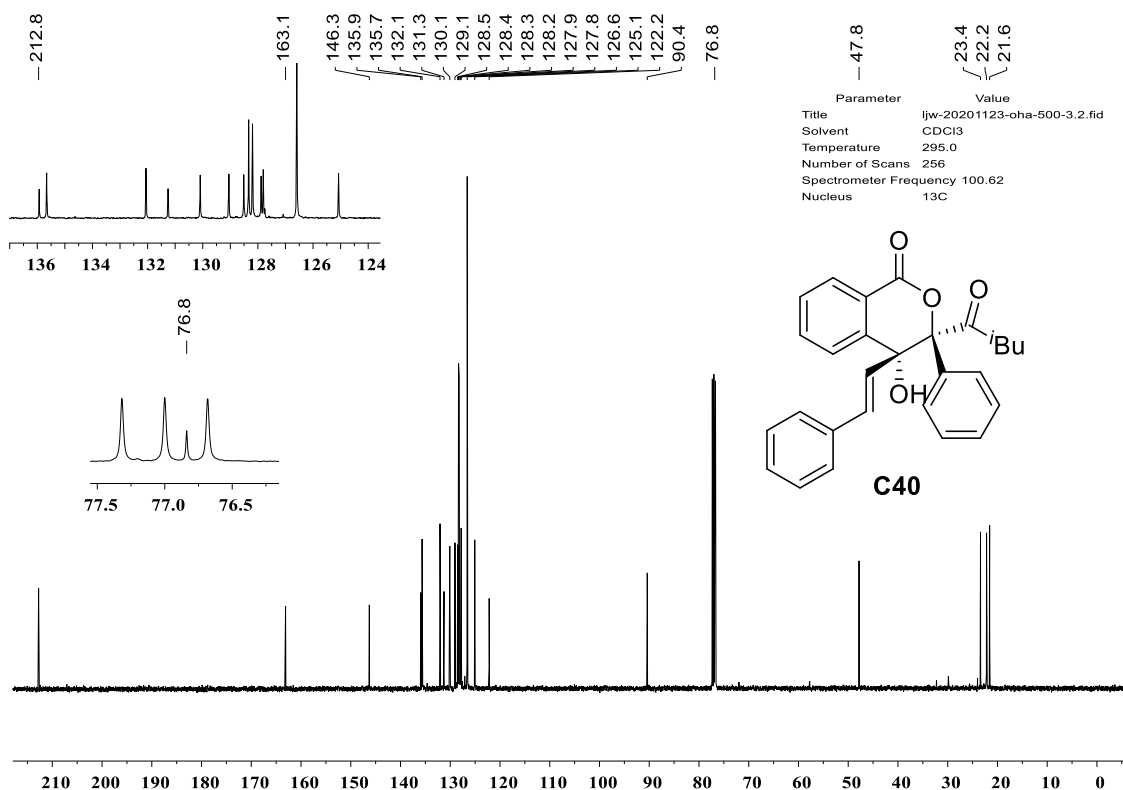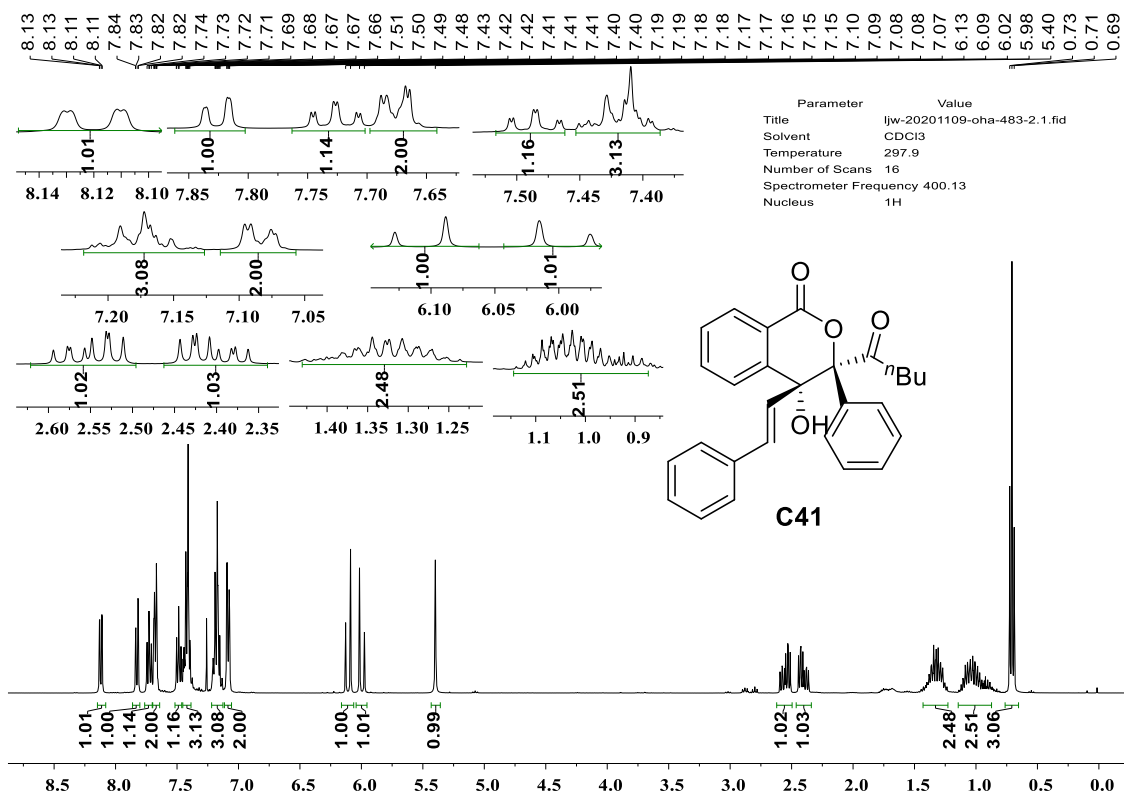

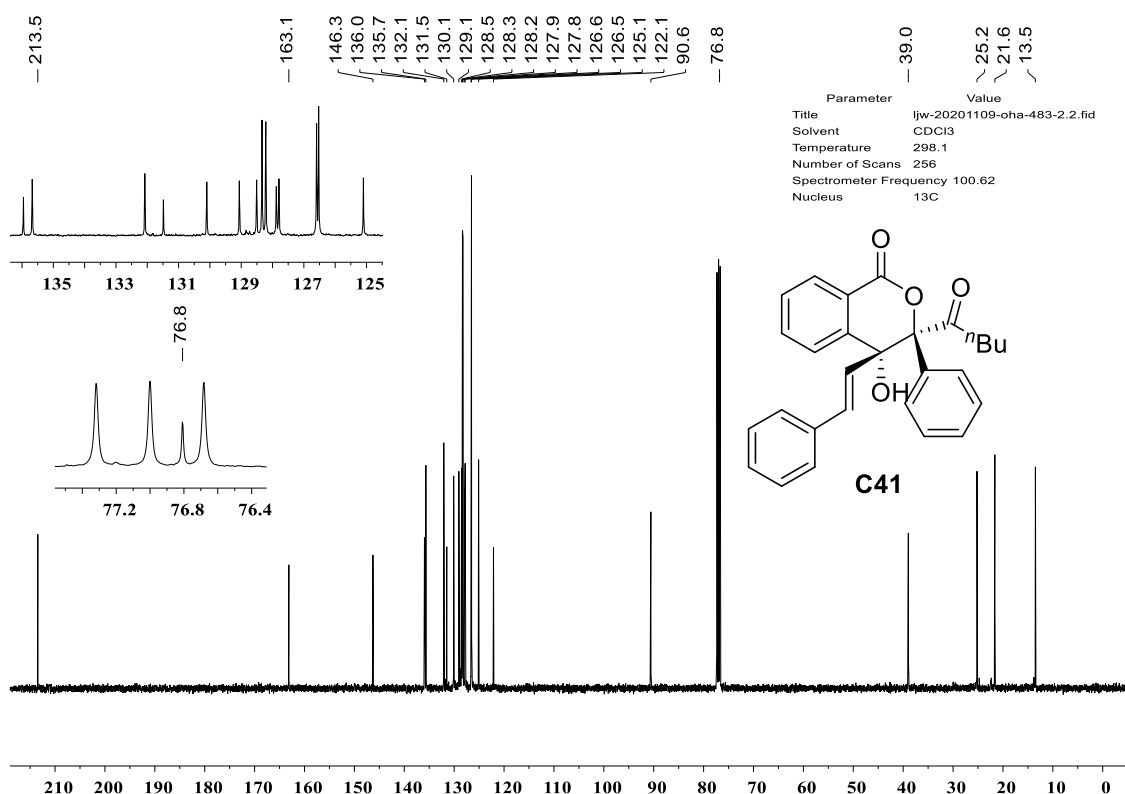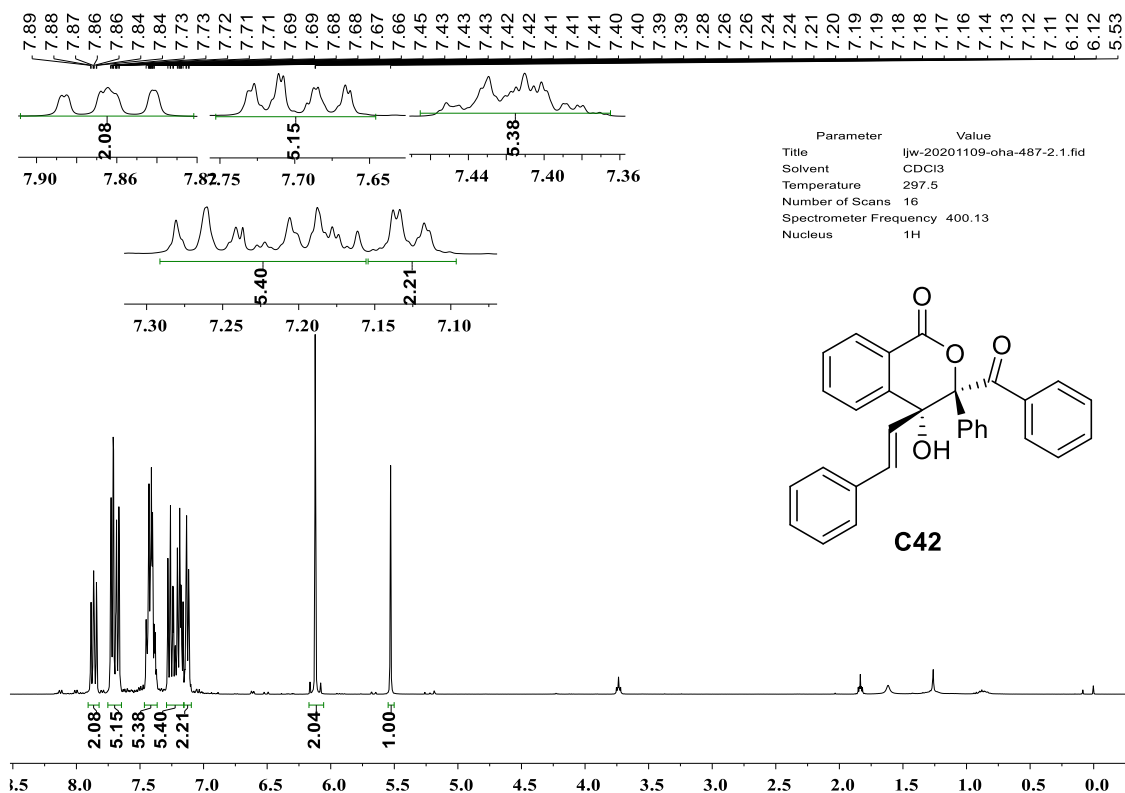

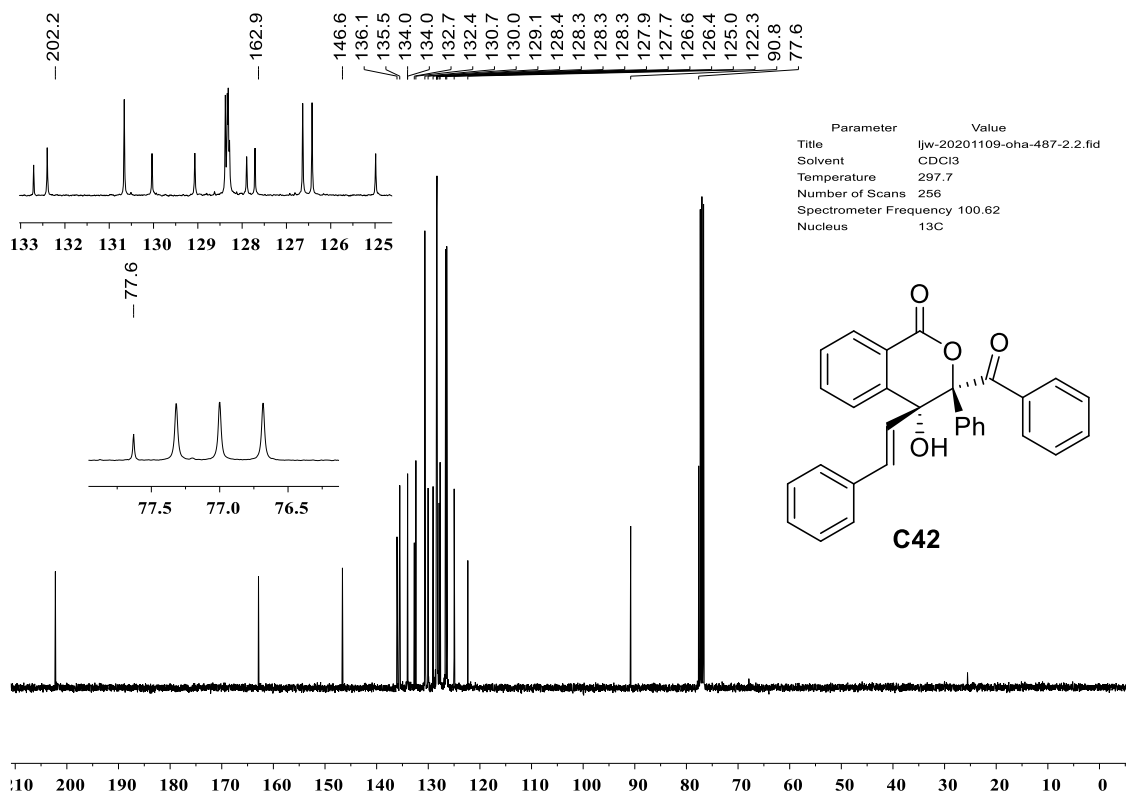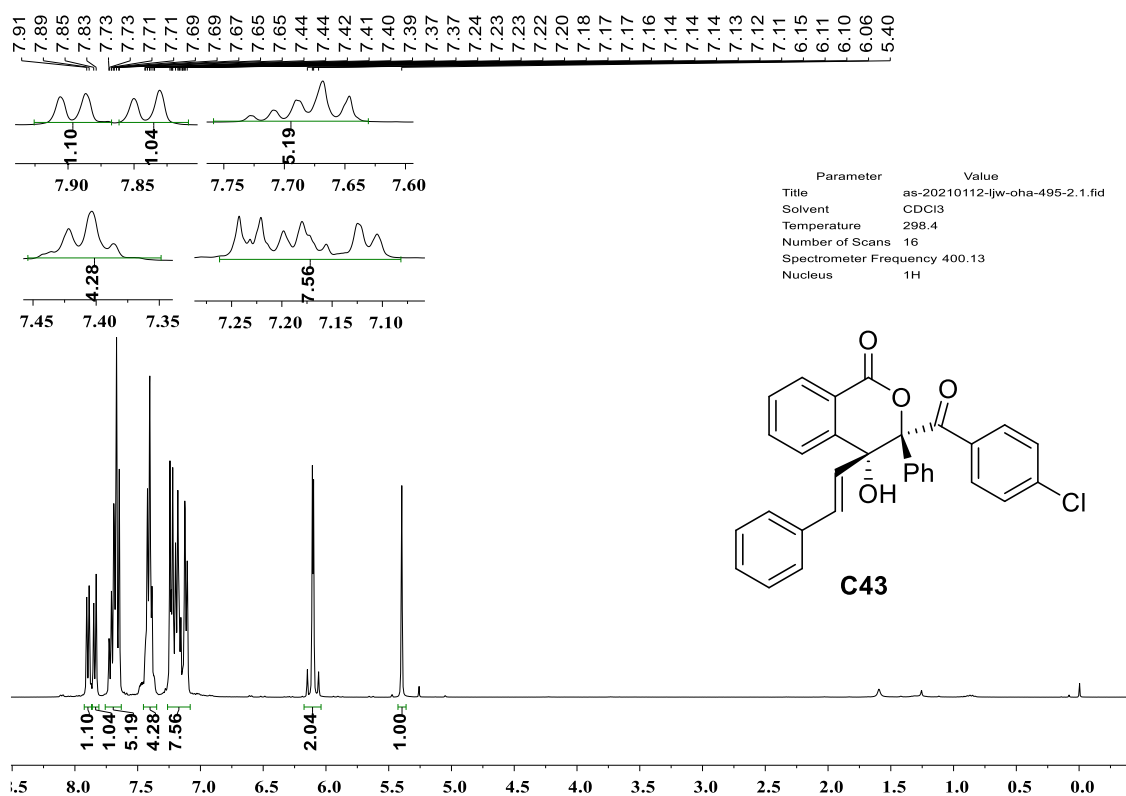

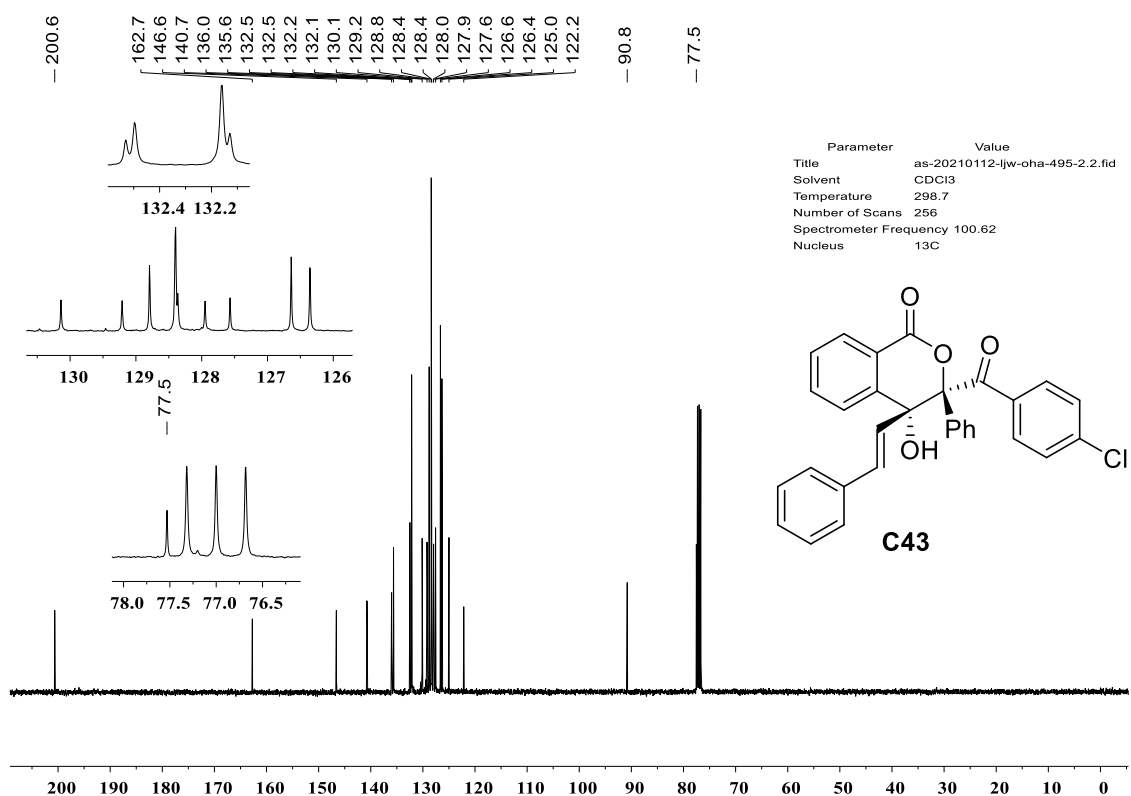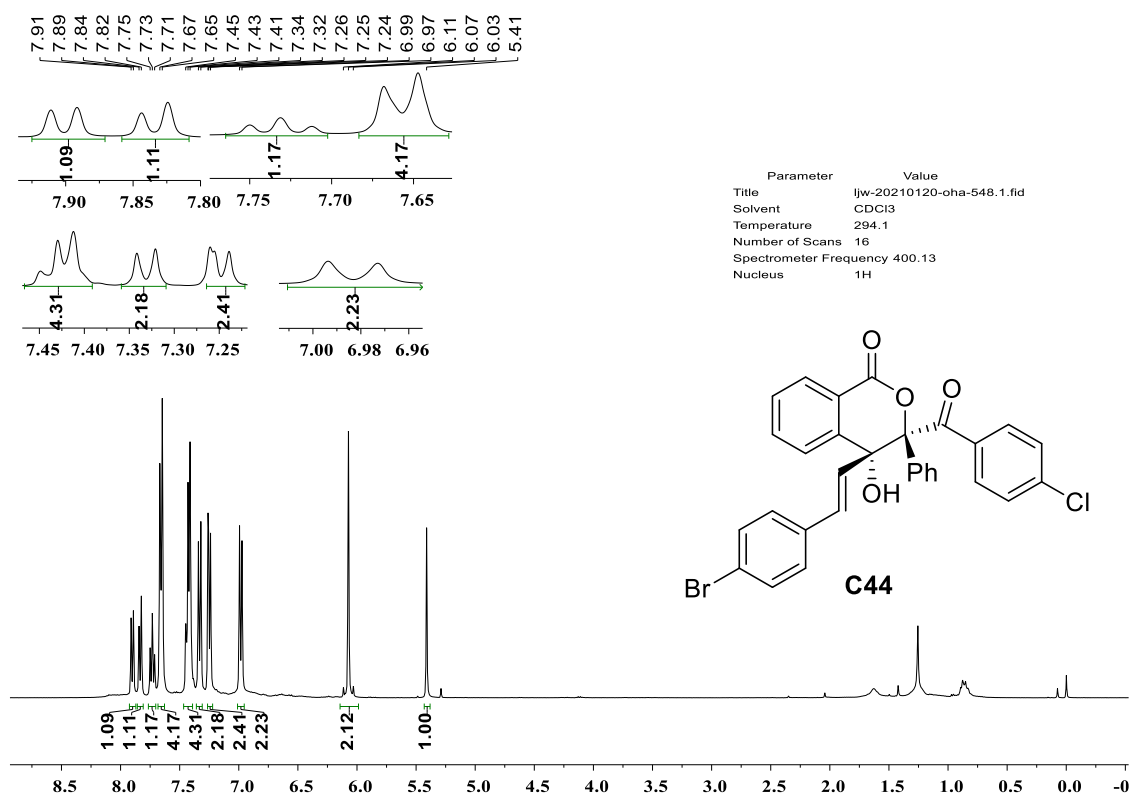

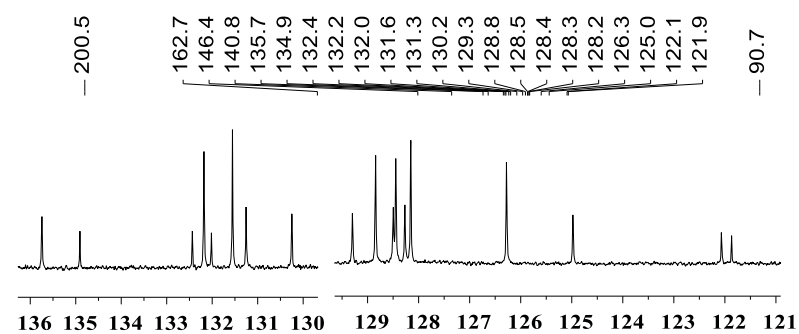

| Parameter              | Value                      |
|------------------------|----------------------------|
| Title                  | ljw-20210120-oha-548.2.fid |
| Solvent                | CDCl3                      |
| Temperature            | 294.6                      |
| Number of Scans        | 256                        |
| Spectrometer Frequency | 100.62                     |
| Nucleus                | 13C                        |

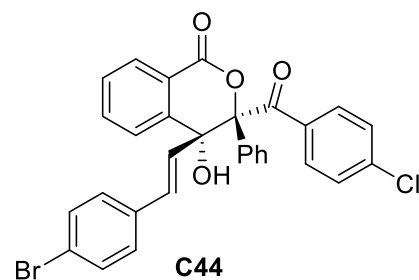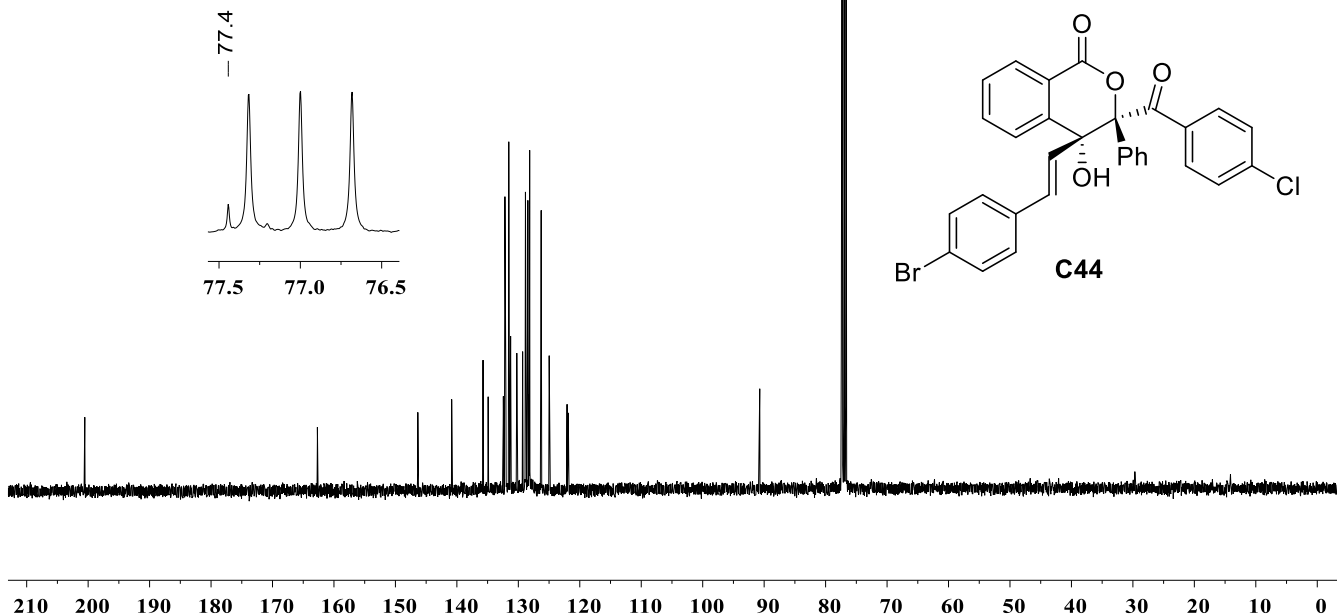

| Parameter              | Value                      |
|------------------------|----------------------------|
| Title                  | ljw-20210120-oha-546.1.fid |
| Solvent                | CDCl3                      |
| Temperature            | 294.0                      |
| Number of Scans        | 16                         |
| Spectrometer Frequency | 400.13                     |
| Nucleus                | 1H                         |

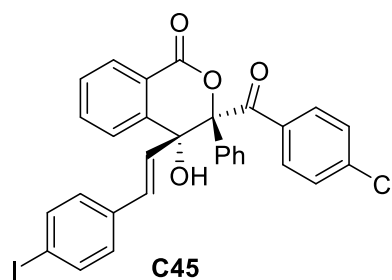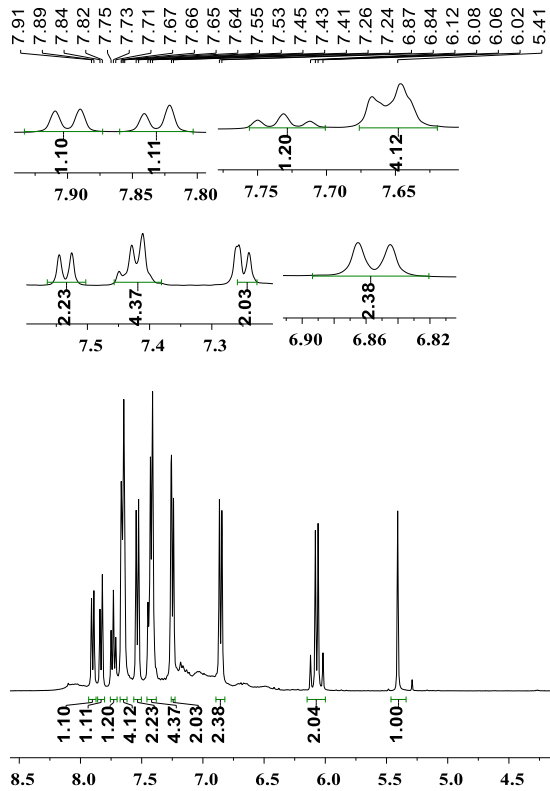

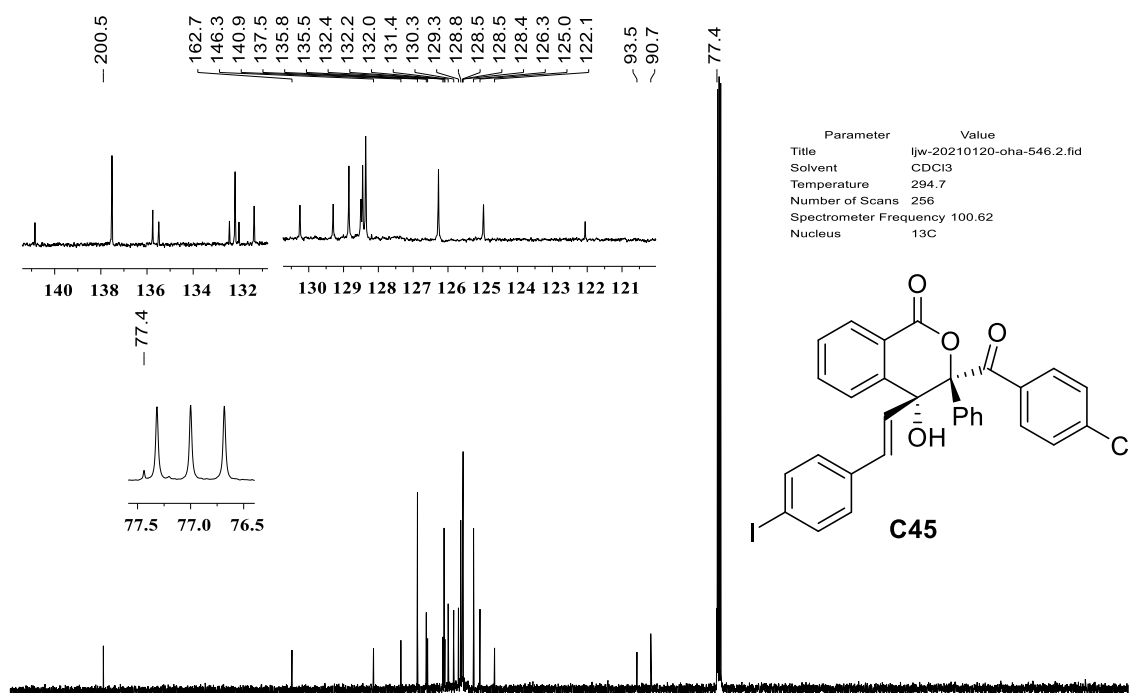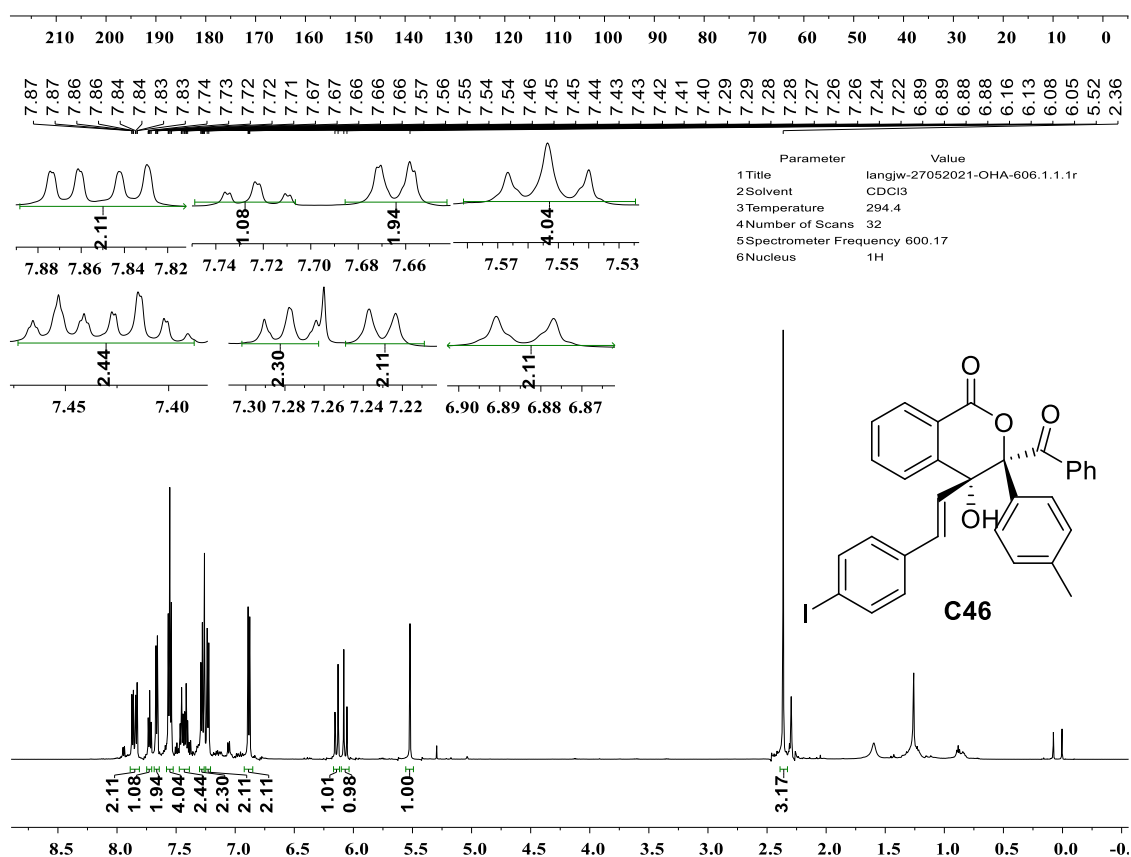

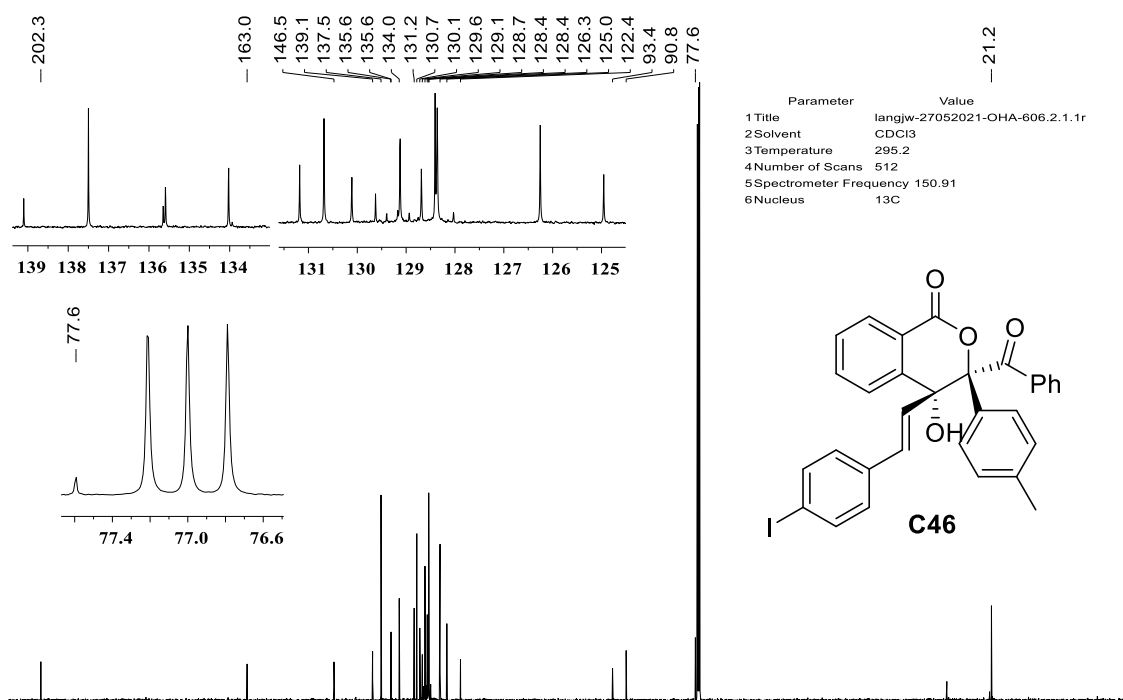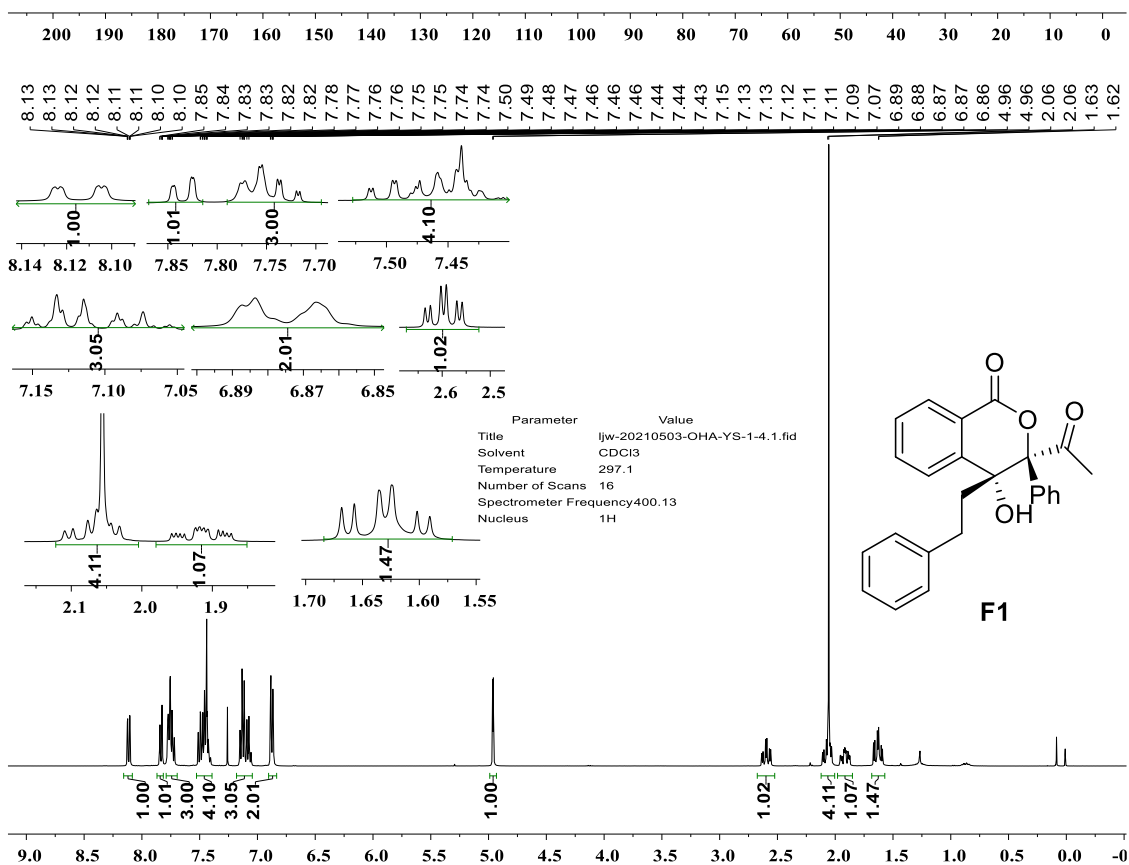

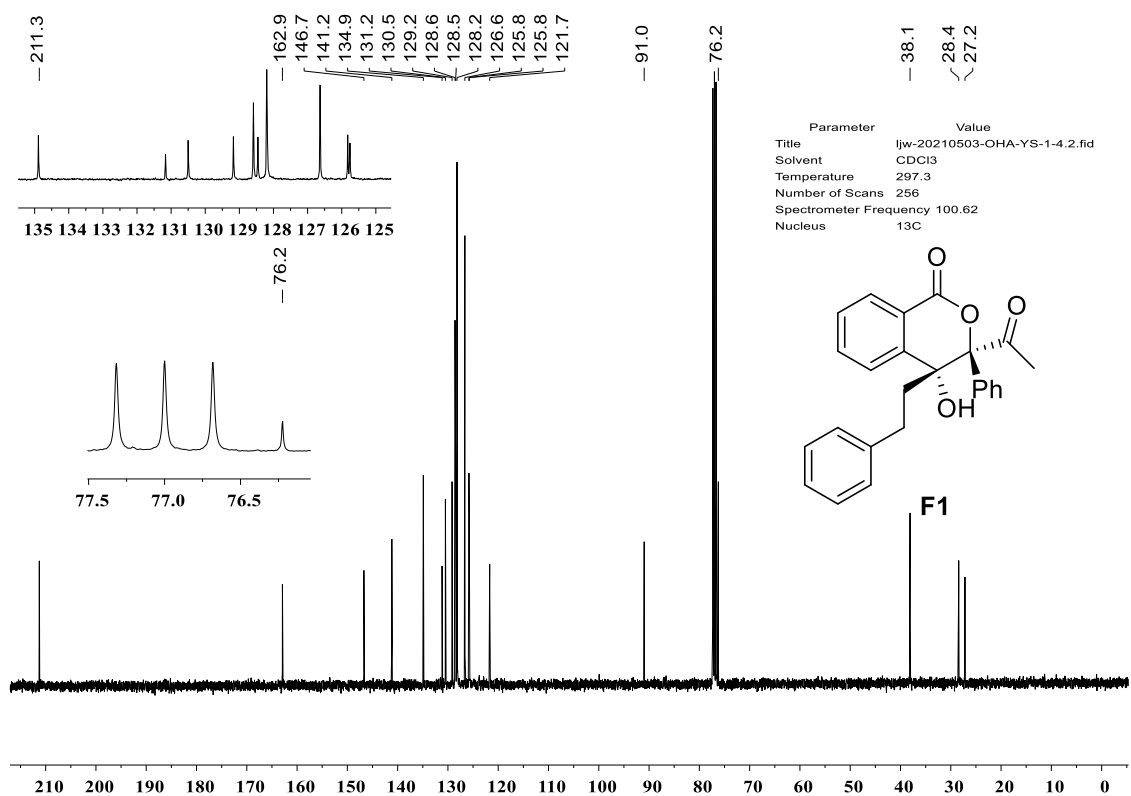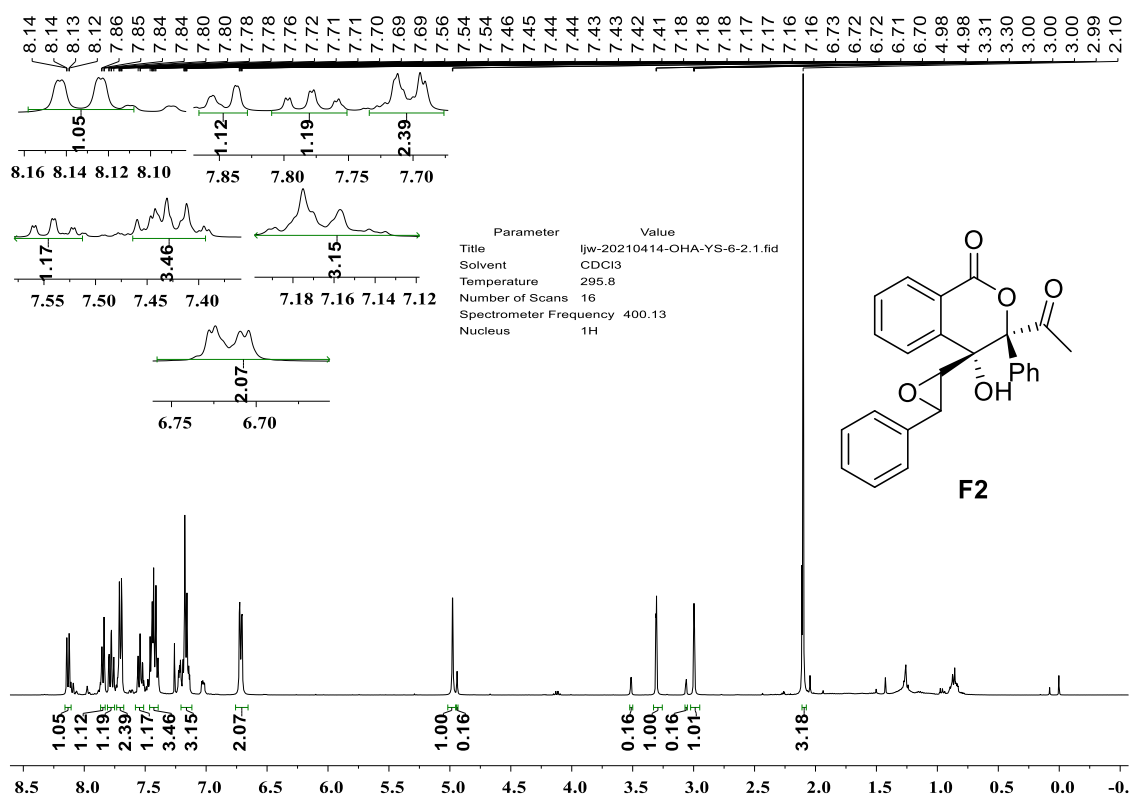



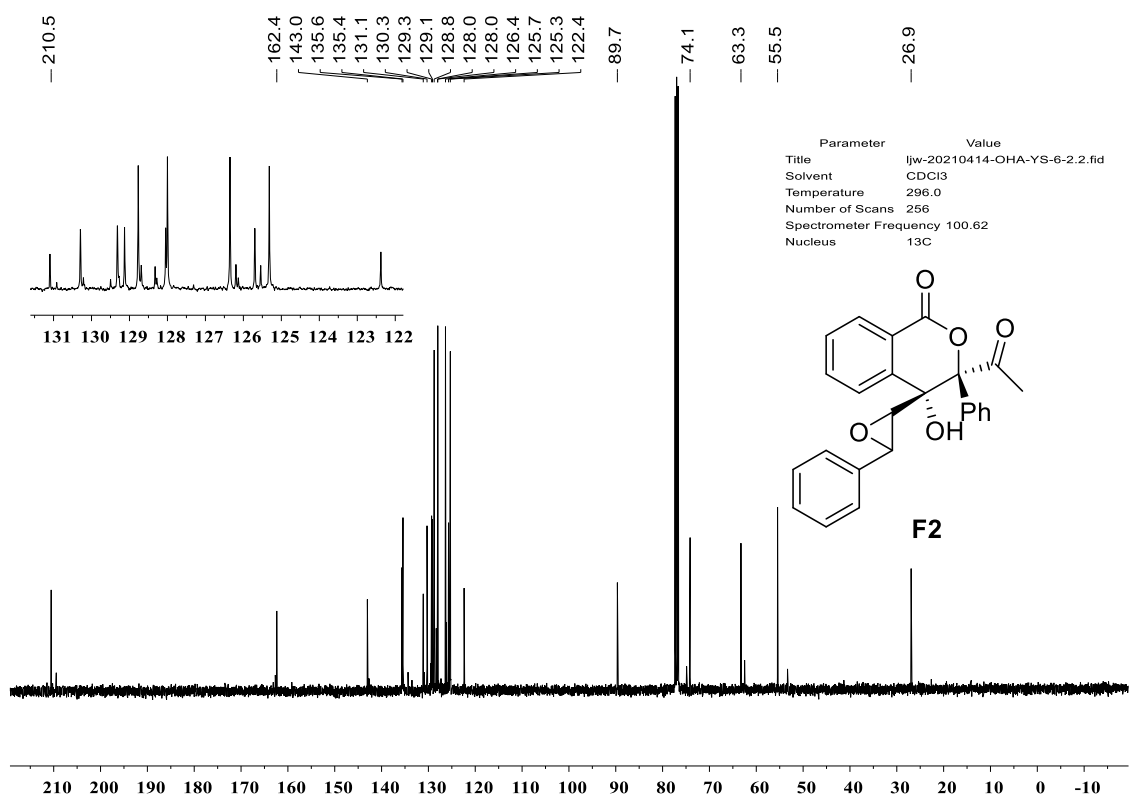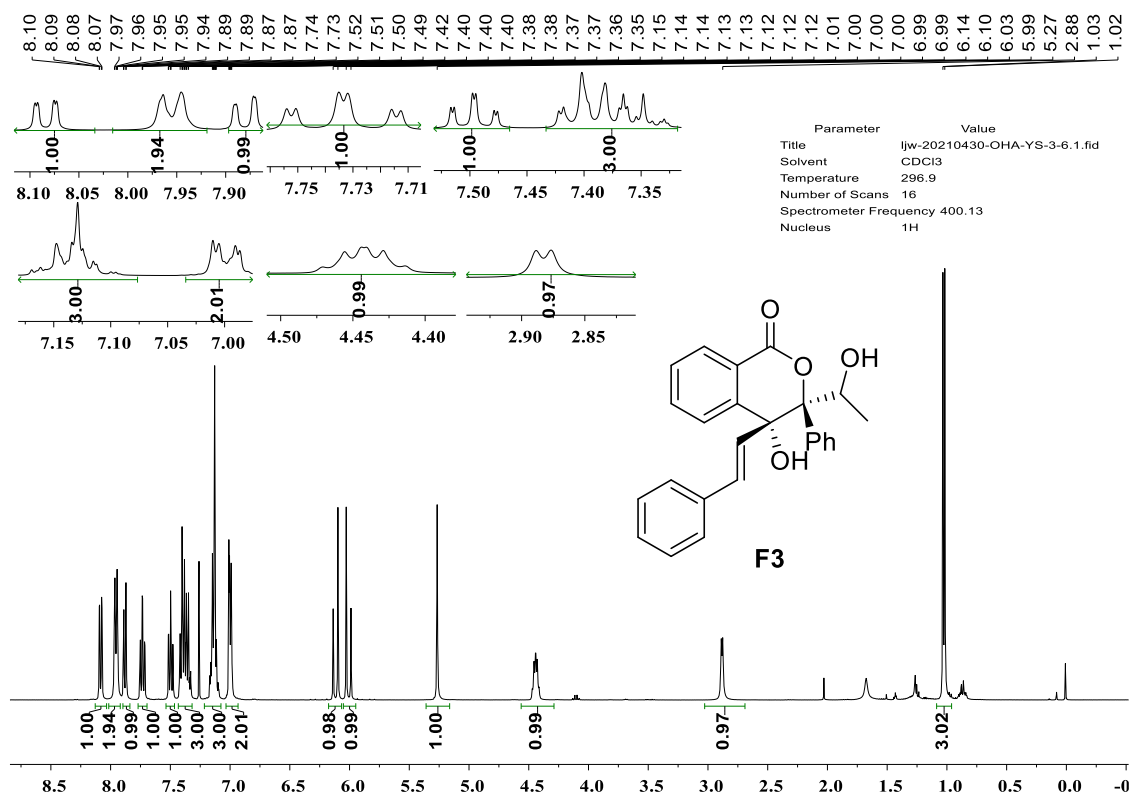

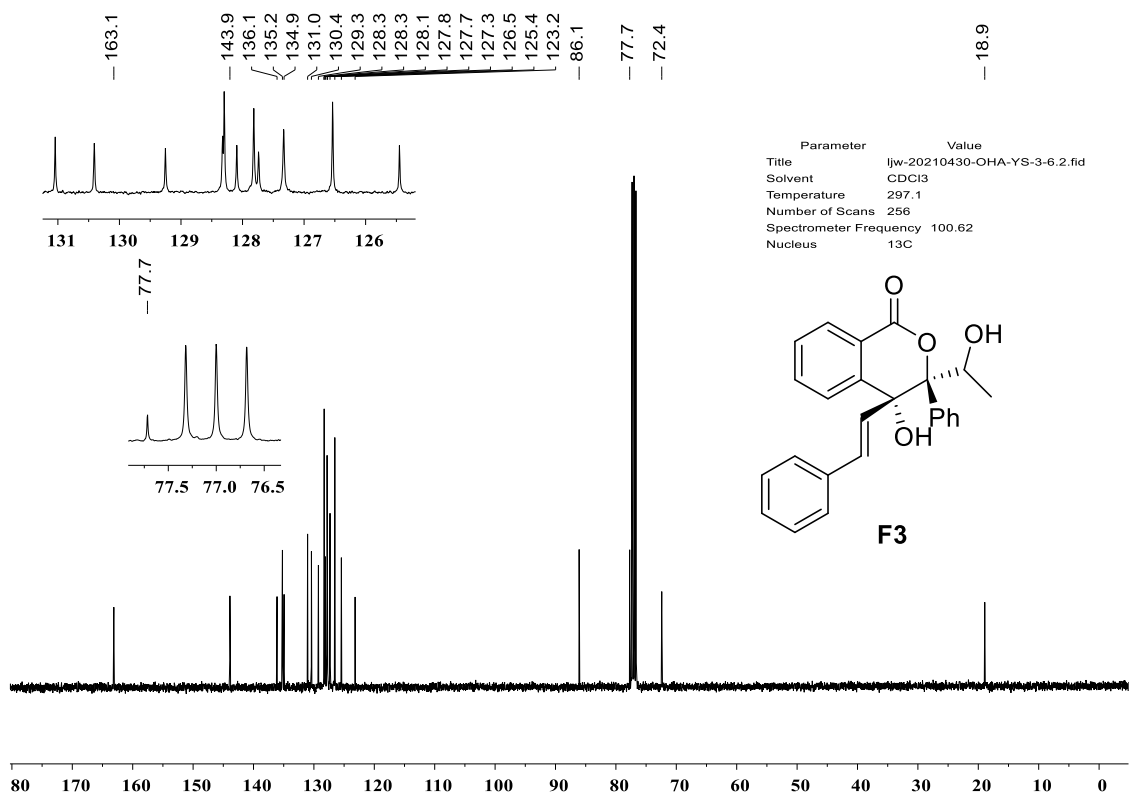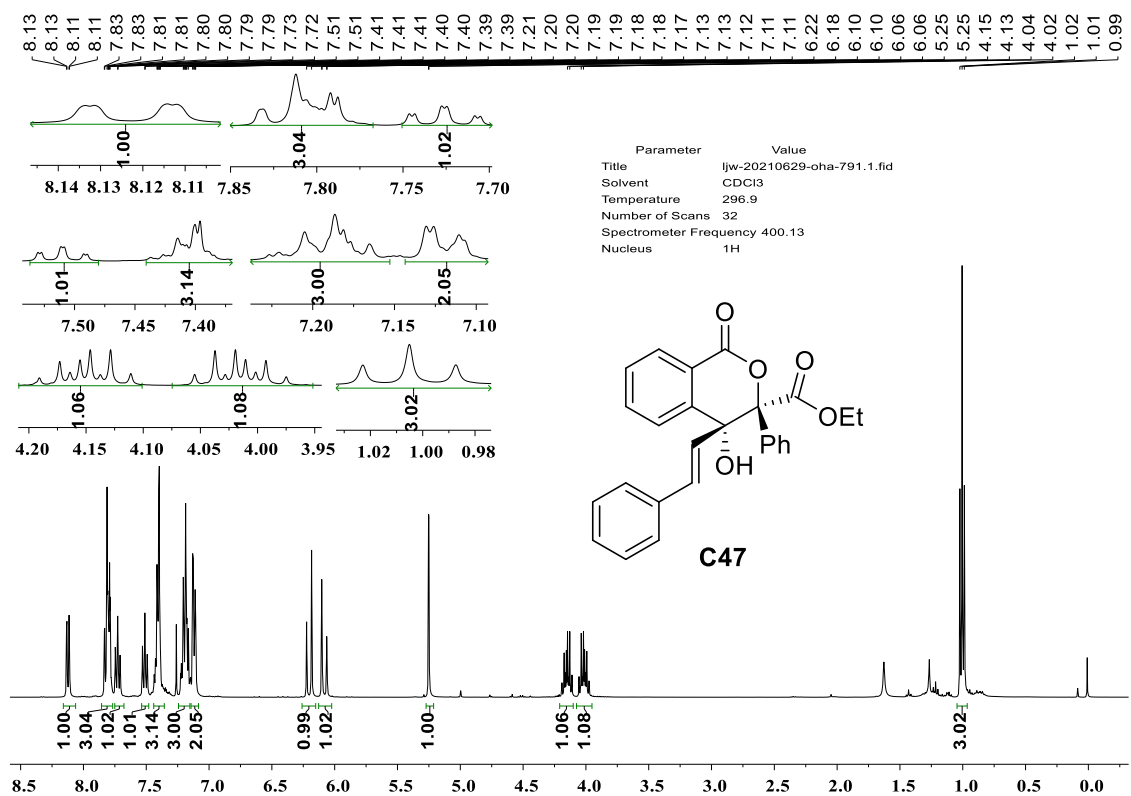

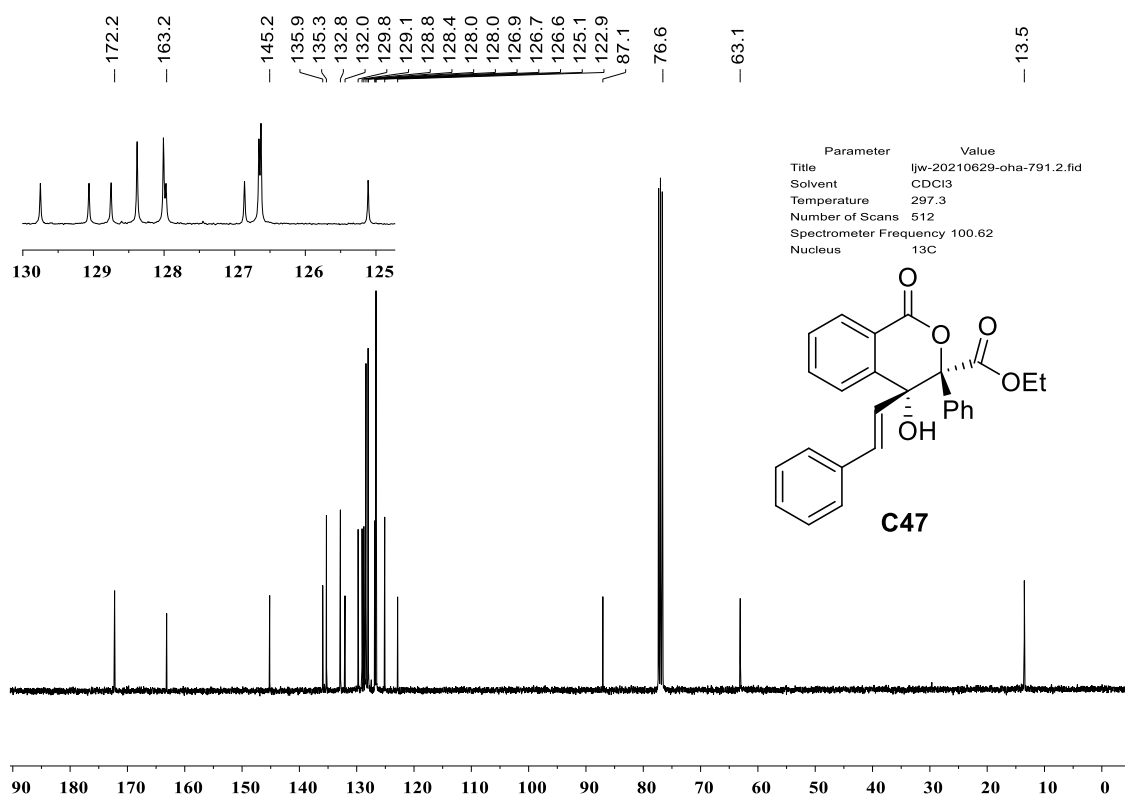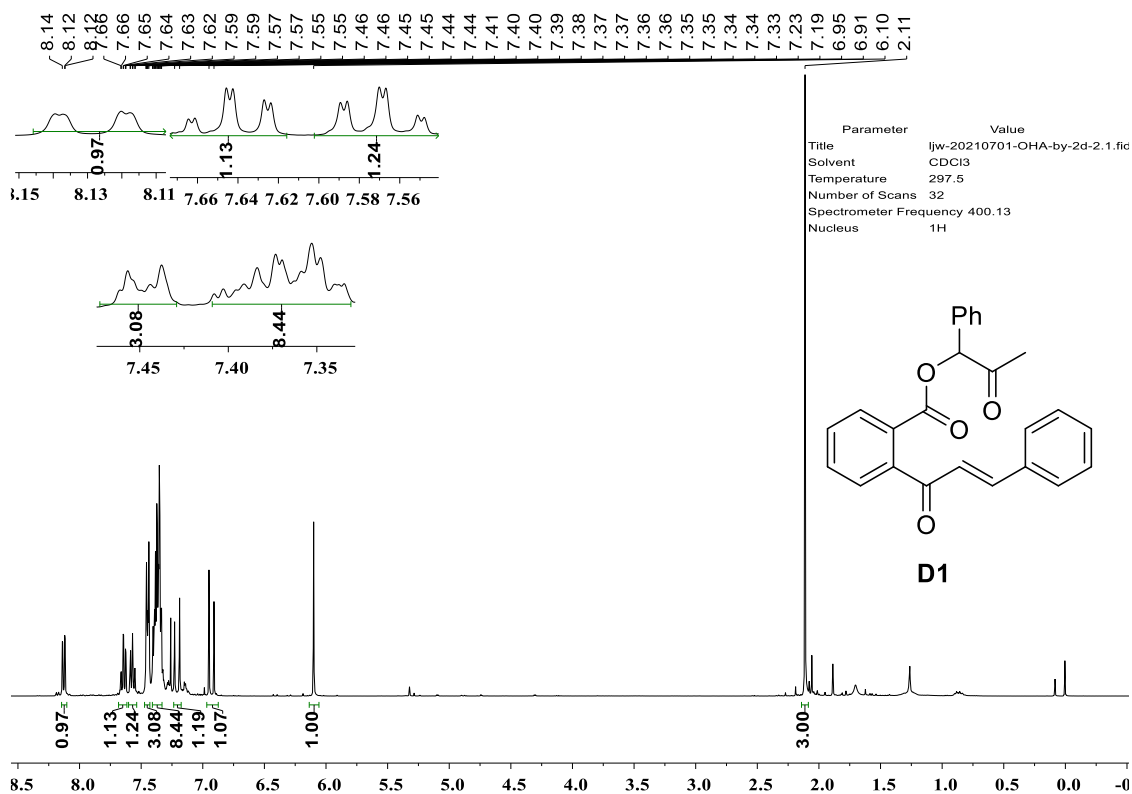

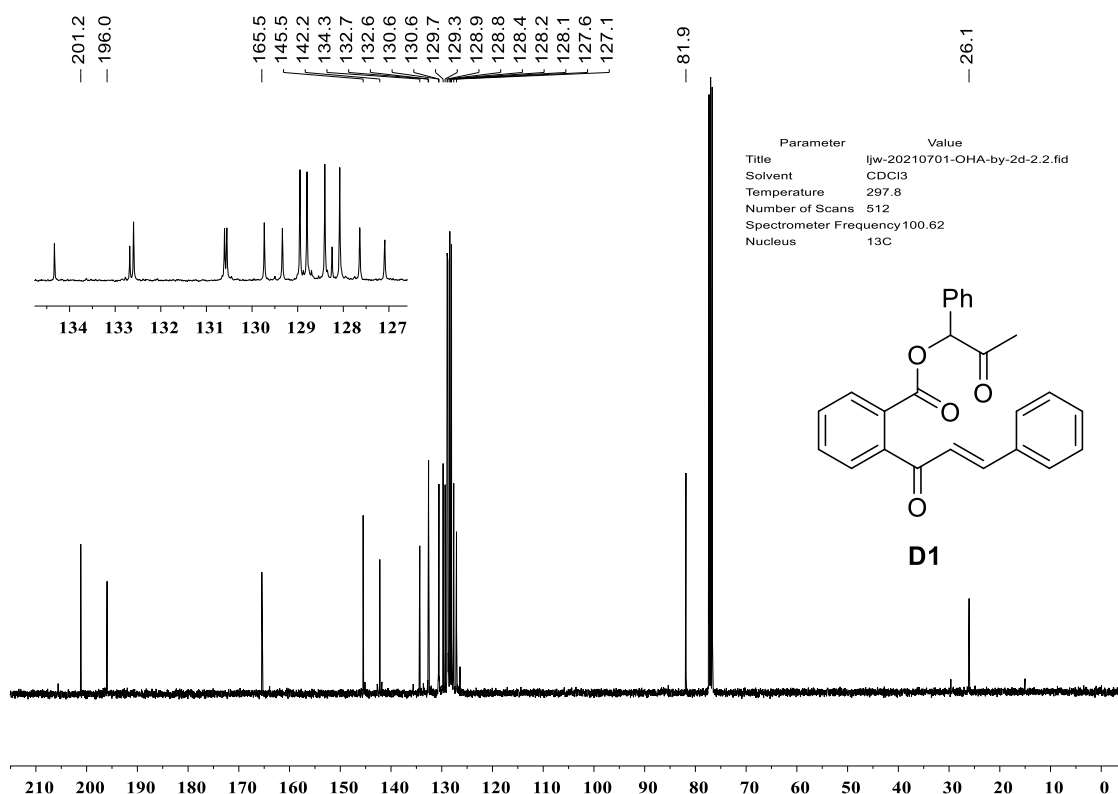

## (L) References

- (a) Y. J. Shi, X. F. Tan, S. Gao, Y. Zhang, J. X. Wang and X. M. Zhang, *Org. Lett.*, 2020, **22**, 2707; (b) S. Z. Wang, L. Y. Cao, H. J. Shi, Y. M. Dong, J. W. Sun and Y. F. Hu, *Chem. Pharm. Bull.*, 2005, **53**, 67; (c) X.-J. Dai, M. Liu, J.-Y. Zhang, X.-Y. Xu, W.-C. Yuan and X.-M. Zhang, *ChemistrySelect*, 2019, **4**, 4458.
- (a) B. Xu, S. -F. Zhou, X. -D. Zuo, Z. -C. Zhang and Q. -L. Zhou, *Angew. Chem., Int. Ed.*, 2014, **53**, 3913; (b) J. Yang, C. Q. Ke, D. Zhang, X. H. Liu and X. M. Feng, *Org. Lett.*, 2018, **20**, 4536.
- a) X. H. Liu, L. L. Lin and X. M. Feng, *Acc. Chem. Res.*, 2011, **44**, 574; (b) X. H. Liu, L. L. Lin and X. M. Feng, *Org. Chem. Front.*, 2014, **1**, 298.
